# Supplementary material
Source: publisher figshare collection journal article supplement (https://gsapubs.figshare.com/articles/dataset/_/16850284)
Supplement: Supplementary file 1 [file 1]

This Supplemental Material accompanies Miller, E.L., Raftrey, M.E., and Lund Snee, J.-E., 2021, Downhill from Austin and Ely to Las Vegas: U-Pb detrital zircon suites from the Eocene–Oligocene Titus Canyon Formation and associated strata, Death Valley, California, *Geological Society of America Bulletin*, v. 132, p. 1559–1574. This Supplemental Material D.H., Foreman, B.Z., and Konstantinou, A., eds., Tectonic Evolution of the Sevier-Laramide Hinterland, Thrust Belt, and Foreland, and Postorogenic Slab Rollback (180–20 Ma): Geological Society of America Special Paper 555, [https://doi.org/10.1130/2021.2555\(14\)](https://doi.org/10.1130/2021.2555(14)).

**Table S1. Detrital Zircon U-Pb data**

| Sample/Analysis | Isotope ratios |                            |      |                              |          |                            |          |                            |          |                | Apparent ages (Ma)         |           |                            |           |                              |           |                  |           |             |  |
|-----------------|----------------|----------------------------|------|------------------------------|----------|----------------------------|----------|----------------------------|----------|----------------|----------------------------|-----------|----------------------------|-----------|------------------------------|-----------|------------------|-----------|-------------|--|
|                 | U<br>(ppm)     | <sup>206</sup> Pb<br>204Pb | U/Th | <sup>206</sup> Pb*<br>207Pb* | ±<br>(%) | <sup>207</sup> Pb*<br>235U | ±<br>(%) | <sup>206</sup> Pb*<br>238U | ±<br>(%) | error<br>corr. | <sup>206</sup> Pb*<br>238U | ±<br>(Ma) | <sup>207</sup> Pb*<br>235U | ±<br>(Ma) | <sup>207</sup> Pb*<br>206Pb* | ±<br>(Ma) | Best age<br>(Ma) | ±<br>(Ma) | Conc<br>(%) |  |
| ELM15MC-10      |                |                            |      |                              |          |                            |          |                            |          |                |                            |           |                            |           |                              |           |                  |           |             |  |
| Spot 114        | 507            | 25114                      | 0.6  | 20.6239                      | 5.4      | 0.0978                     | 5.5      | 0.0146                     | 1.0      | 0.19           | 93.6                       | 1.0       | 94.7                       | 5.0       | 123.1                        | 126.8     | 93.6             | 1.0       | NA          |  |
| Spot 56         | 87             | 9489                       | 1.0  | 21.1666                      | 23.9     | 0.0974                     | 24.2     | 0.0149                     | 3.9      | 0.16           | 95.6                       | 3.7       | 94.3                       | 21.8      | 61.6                         | 575.9     | 95.6             | 3.7       | NA          |  |
| Spot 39         | 301            | 13803                      | 2.1  | 20.0961                      | 7.6      | 0.1046                     | 8.0      | 0.0152                     | 2.7      | 0.34           | 97.5                       | 2.6       | 101.0                      | 7.7       | 183.8                        | 176.3     | 97.5             | 2.6       | NA          |  |
| Spot 62         | 169            | 10917                      | 1.5  | 20.8670                      | 16.0     | 0.1014                     | 16.2     | 0.0153                     | 2.9      | 0.18           | 98.1                       | 2.8       | 98.0                       | 15.1      | 95.5                         | 379.7     | 98.1             | 2.8       | NA          |  |
| Spot 6          | 869            | 97391                      | 0.9  | 21.3437                      | 3.1      | 0.1003                     | 3.3      | 0.0155                     | 0.9      | 0.29           | 99.3                       | 0.9       | 97.0                       | 3.0       | 41.7                         | 75.2      | 99.3             | 0.9       | NA          |  |
| Spot 97         | 149            | 9690                       | 2.3  | 20.0668                      | 24.0     | 0.1081                     | 24.4     | 0.0157                     | 4.3      | 0.18           | 100.6                      | 4.3       | 104.2                      | 24.2      | 187.2                        | 566.0     | 101              | 4.3       | NA          |  |
| Spot 36         | 844            | 21147                      | 1.9  | 20.8507                      | 4.0      | 0.1057                     | 4.0      | 0.0160                     | 0.8      | 0.19           | 102.2                      | 0.8       | 102.0                      | 3.9       | 97.3                         | 94.1      | 102              | 0.8       | NA          |  |
| Spot 38         | 271            | 24572                      | 1.4  | 21.9509                      | 12.3     | 0.1015                     | 12.4     | 0.0162                     | 1.6      | 0.13           | 103.3                      | 1.6       | 98.2                       | 11.6      | -25.8                        | 298.6     | 103              | 1.6       | NA          |  |
| Spot 118        | 345            | 41275                      | 1.7  | 20.4419                      | 4.4      | 0.1093                     | 4.6      | 0.0162                     | 1.0      | 0.23           | 103.6                      | 1.1       | 105.3                      | 4.6       | 144.0                        | 104.1     | 104              | 1.1       | NA          |  |
| Spot 60         | 383            | 33308                      | 2.4  | 21.5475                      | 8.1      | 0.1045                     | 8.2      | 0.0163                     | 1.1      | 0.13           | 104.4                      | 1.1       | 100.9                      | 7.9       | 19.0                         | 195.7     | 104              | 1.1       | NA          |  |
| Spot 117        | 523            | 25700                      | 1.9  | 20.9572                      | 5.5      | 0.1085                     | 6.5      | 0.0165                     | 3.5      | 0.54           | 105.4                      | 3.7       | 104.6                      | 6.5       | 85.2                         | 130.2     | 105              | 3.7       | NA          |  |
| Spot 34         | 682            | 98003                      | 1.4  | 20.9260                      | 2.3      | 0.1171                     | 2.6      | 0.0178                     | 1.1      | 0.44           | 113.5                      | 1.3       | 112.4                      | 2.7       | 88.8                         | 55.0      | 114              | 1.3       | NA          |  |
| Spot 46         | 619            | 22455                      | 3.9  | 20.6783                      | 3.9      | 0.1209                     | 4.1      | 0.0181                     | 1.0      | 0.24           | 115.9                      | 1.1       | 115.9                      | 4.4       | 116.9                        | 92.7      | 116              | 1.1       | NA          |  |
| Spot 101        | 610            | 81857                      | 1.4  | 20.9008                      | 2.4      | 0.1206                     | 2.7      | 0.0183                     | 1.3      | 0.47           | 116.8                      | 1.5       | 115.6                      | 3.0       | 91.6                         | 56.8      | 117              | 1.5       | NA          |  |
| Spot 35         | 114            | 10124                      | 1.0  | 19.9922                      | 14.1     | 0.1624                     | 14.6     | 0.0236                     | 4.1      | 0.28           | 150.1                      | 6.0       | 152.8                      | 20.8      | 195.9                        | 328.2     | 150              | 6.0       | NA          |  |
| Spot 67         | 246            | 2290                       | 0.8  | 16.6809                      | 23.9     | 0.2013                     | 24.1     | 0.0244                     | 3.2      | 0.13           | 155.1                      | 4.9       | 186.2                      | 41.0      | 601.7                        | 523.2     | 155              | 4.9       | NA          |  |
| Spot 12         | 255            | 21973                      | 1.1  | 20.6989                      | 7.0      | 0.1689                     | 7.1      | 0.0254                     | 1.3      | 0.19           | 161.4                      | 2.1       | 158.5                      | 10.4      | 114.5                        | 164.2     | 161              | 2.1       | NA          |  |
| Spot 7          | 259            | 43125                      | 1.3  | 21.9313                      | 6.4      | 0.1596                     | 6.5      | 0.0254                     | 0.9      | 0.14           | 161.6                      | 1.4       | 150.4                      | 9.1       | -23.6                        | 155.6     | 162              | 1.4       | NA          |  |
| Spot 26         | 289            | 26388                      | 0.9  | 20.8272                      | 5.6      | 0.1684                     | 5.7      | 0.0254                     | 1.2      | 0.21           | 161.9                      | 1.9       | 158.0                      | 8.3       | 100.0                        | 131.9     | 162              | 1.9       | NA          |  |
| Spot 53         | 106            | 16159                      | 0.9  | 22.2842                      | 24.1     | 0.1576                     | 24.2     | 0.0255                     | 2.8      | 0.11           | 162.1                      | 4.4       | 148.6                      | 33.5      | -62.4                        | 594.0     | 162              | 4.4       | NA          |  |
| Spot 11         | 162            | 21024                      | 1.4  | 20.1989                      | 15.2     | 0.1744                     | 15.5     | 0.0256                     | 2.9      | 0.19           | 162.7                      | 4.7       | 163.3                      | 23.4      | 171.9                        | 357.5     | 163              | 4.7       | NA          |  |
| Spot 52         | 69             | 11686                      | 1.1  | 21.1724                      | 27.4     | 0.1666                     | 27.6     | 0.0256                     | 3.3      | 0.12           | 162.8                      | 5.3       | 156.4                      | 40.0      | 61.0                         | 663.3     | 163              | 5.3       | NA          |  |
| Spot 25         | 381            | 31064                      | 0.9  | 19.9008                      | 3.7      | 0.1779                     | 3.7      | 0.0257                     | 0.7      | 0.19           | 163.4                      | 1.1       | 166.2                      | 5.7       | 206.6                        | 85.4      | 163              | 1.1       | NA          |  |
| Spot 49         | 337            | 14927                      | 0.7  | 19.6362                      | 5.7      | 0.1803                     | 5.9      | 0.0257                     | 1.6      | 0.27           | 163.4                      | 2.5       | 168.3                      | 9.1       | 237.5                        | 130.6     | 163              | 2.5       | NA          |  |
| Spot 102        | 275            | 21103                      | 1.0  | 20.1135                      | 9.2      | 0.1762                     | 9.2      | 0.0257                     | 1.0      | 0.10           | 163.6                      | 1.5       | 164.8                      | 14.0      | 181.8                        | 213.9     | 164              | 1.5       | NA          |  |
| Spot 100        | 303            | 57710                      | 1.4  | 20.1317                      | 4.4      | 0.1760                     | 4.6      | 0.0257                     | 1.3      | 0.28           | 163.6                      | 2.1       | 164.6                      | 7.0       | 179.7                        | 103.4     | 164              | 2.1       | NA          |  |
| Spot 108        | 127            | 26280                      | 1.2  | 19.5663                      | 16.6     | 0.1812                     | 16.8     | 0.0257                     | 2.7      | 0.16           | 163.7                      | 4.4       | 169.1                      | 26.2      | 245.7                        | 383.7     | 164              | 4.4       | NA          |  |
| Spot 20         | 289            | 3617                       | 1.3  | 19.1963                      | 6.3      | 0.1849                     | 6.5      | 0.0257                     | 1.5      | 0.23           | 163.9                      | 2.4       | 172.3                      | 10.3      | 289.5                        | 144.6     | 164              | 2.4       | NA          |  |
| Spot 16         | 274            | 31611                      | 1.0  | 19.0287                      | 3.4      | 0.1866                     | 3.7      | 0.0258                     | 1.3      | 0.35           | 163.9                      | 2.1       | 173.7                      | 5.9       | 309.5                        | 78.5      | 164              | 2.1       | NA          |  |
| Spot 105        | 265            | 42839                      | 0.8  | 19.2497                      | 7.8      | 0.1848                     | 8.8      | 0.0258                     | 3.9      | 0.44           | 164.2                      | 6.3       | 172.2                      | 13.9      | 283.2                        | 179.8     | 164              | 6.3       | NA          |  |
| Spot 71         | 117            | 15312                      | 1.2  | 23.3728                      | 20.8     | 0.1526                     | 20.9     | 0.0259                     | 1.5      | 0.07           | 164.7                      | 2.5       | 144.2                      | 28.1      | -180.1                       | 524.9     | 165              | 2.5       | NA          |  |
| Spot 79         | 233            | 9834                       | 1.2  | 20.1892                      | 7.7      | 0.1769                     | 7.8      | 0.0259                     | 1.4      | 0.18           | 164.9                      | 2.3       | 165.4                      | 11.9      | 173.0                        | 179.4     | 165              | 2.3       | NA          |  |
| Spot 32         | 728            | 100723                     | 0.5  | 19.9375                      | 3.3      | 0.1799                     | 3.5      | 0.0260                     | 1.1      | 0.32           | 165.5                      | 1.8       | 168.0                      | 5.4       | 202.2                        | 77.1      | 166              | 1.8       | NA          |  |
| Spot 29         | 645            | 111889                     | 0.9  | 19.9635                      | 2.6      | 0.1797                     | 3.0      | 0.0260                     | 1.5      | 0.50           | 165.6                      | 2.4       | 167.8                      | 4.6       | 199.3                        | 60.0      | 166              | 2.4       | NA          |  |
| Spot 65         | 459            | 35760                      | 0.6  | 20.1709                      | 3.1      | 0.1780                     | 3.2      | 0.0260                     | 0.8      | 0.25           | 165.7                      | 1.3       | 166.3                      | 4.9       | 175.2                        | 72.6      | 166              | 1.3       | NA          |  |
| Spot 58         | 118            | 960                        | 1.3  | 14.7834                      | 26.8     | 0.2430                     | 28.6     | 0.0261                     | 10.0     | 0.35           | 165.8                      | 16.3      | 220.9                      | 56.9      | 857.6                        | 566.6     | 166              | 16.3      | NA          |  |
| Spot 95         | 204            | 16517                      | 1.5  | 19.9661                      | 12.1     | 0.1809                     | 12.4     | 0.0262                     | 2.7      | 0.22           | 166.7                      | 4.4       | 168.8                      | 19.2      | 198.9                        | 281.1     | 167              | 4.4       | NA          |  |
| Spot 81         | 225            | 26869                      | 1.3  | 21.3872                      | 3.9      | 0.1691                     | 4.2      | 0.0262                     | 1.5      | 0.36           | 166.9                      | 2.5       | 158.6                      | 6.2       | 36.8                         | 93.5      | 167              | 2.5       | NA          |  |
| Spot 99         | 375            | 26200                      | 1.5  | 19.9976                      | 4.3      | 0.1809                     | 4.4      | 0.0262                     | 1.0      | 0.23           | 166.9                      | 1.7       | 168.8                      | 6.9       | 195.3                        | 100.2     | 167              | 1.7       | NA          |  |
| Spot 107        | 362            | 124746                     | 1.1  | 20.9378                      | 2.5      | 0.1741                     | 2.8      | 0.0264                     | 1.1      | 0.41           | 168.2                      | 1.9       | 162.9                      | 4.2       | 87.4                         | 60.2      | 168              | 1.9       | NA          |  |
| Spot 112        | 296            | 38645                      | 1.0  | 21.2766                      | 3.1      | 0.1714                     | 5.0      | 0.0264                     | 3.9      | 0.78           | 168.3                      | 6.5       | 160.6                      | 7.5       | 49.2                         | 74.8      | 168              | 6.5       | NA          |  |
| Spot 119        | 344            | 64077                      | 1.3  | 20.6368                      | 2.1      | 0.1771                     | 2.4      | 0.0265                     | 1.2      | 0.49           | 168.7                      | 2.0       | 165.6                      | 3.7       | 121.6                        | 49.1      | 169              | 2.0       | NA          |  |
| Spot 87         | 271            | 25098                      | 1.3  | 20.3964                      | 5.9      | 0.1794                     | 6.3      | 0.0265                     | 2.3      | 0.36           | 168.8                      | 3.8       | 167.5                      | 9.8       | 149.2                        | 138.7     | 169              | 3.8       | NA          |  |
| Spot 9          | 797            | 61230                      | 0.5  | 20.0979                      | 2.6      | 0.1821                     | 2.7      | 0.0265                     | 0.8      | 0.29           | 168.8                      | 1.3       | 169.8                      | 4.3       | 183.6                        | 60.9      | 169              | 1.3       | NA          |  |
| Spot 75         | 363            | 9104                       | 1.5  | 19.3406                      | 6.0      | 0.1901                     | 6.6      | 0.0267                     | 2.7      | 0.40           | 169.6                      | 4.4       | 176.7                      | 10.7      | 272.3                        | 138.8     | 170              | 4.4       | NA          |  |
| Spot 33         | 698            | 73540                      | 1.3  | 20.0634                      | 2.5      | 0.1842                     | 4.2      | 0.0268                     | 3.4      | 0.81           | 170.6                      | 5.7       | 171.7                      | 6.6       | 187.6                        | 57.1      | 171              | 5.7       | NA          |  |
| Spot 4          | 168            | 15572                      | 2.5  | 19.9652                      | 7.6      | 0.1860                     | 7.7      | 0.0269                     | 1.4      | 0.18           | 171.4                      | 2.3       | 173.2                      | 12.3      | 199.0                        | 177.3     | 171              | 2.3       | NA          |  |
| Spot 93         | 262            | 25613                      | 1.2  | 20.1118                      | 7.2      | 0.1848                     | 7.3      | 0.0270                     | 1.3      | 0.18           | 171.4                      | 2.2       | 172.2                      | 11.5      | 182.0                        | 166.9     | 171              | 2.2       | NA          |  |
| Spot 116        | 93             | 12352                      | 1.3  | 21.8443                      | 17.2     | 0.1702                     | 17.3     | 0.0270                     | 1.9      | 0.11           | 171.6                      | 3.2       | 159.6                      | 25.5      | -14.0                        | 417.6     | 172              | 3.2       | NA          |  |
| Spot 48         | 153            | 20624                      | 0.6  | 21.1719                      | 11.3     | 0.1761                     | 11.7     | 0.0270                     | 2.9      | 0.25           | 172.0                      | 4.9       | 164.7                      | 17.7      | 61.0                         | 270.1     | 172              | 4.9       | NA          |  |
| Spot 24         | 140            | 27396                      | 0.8  | 20.3532                      | 11.1     | 0.1833                     | 11.3     | 0.0271                     | 2.2      | 0.19           | 172.1                      | 3.7       | 170.9                      | 17.8      | 154.1                        | 260.0     | 172              | 3.7       | NA          |  |
| Spot 76         | 376            | 62668                      | 1.1  | 19.8718                      | 4.0      | 0.1878                     | 4.6      | 0.0271                     | 2.2      | 0.48           | 172.1                      | 3.7       | 174.7                      | 7.4       | 209.9                        | 93.4      | 172              | 3.7       | NA          |  |
| Spot 13         | 124            | 21523                      | 1.4  | 22.5478                      | 11.8     | 0.1659                     | 11.9     | 0.0271                     | 2.0      | 0.17           | 172.5                      | 3.5       | 155.8                      | 17.3      | -91.2                        | 289.4     | 173              | 3.5       | NA          |  |
| Spot 57         | 193            | 39777                      | 1.4  | 19.3890                      | 4.6      | 0.1934                     | 4.7      | 0.0272                     | 1.3      | 0.28           | 173.0                      | 2.2       | 179.5                      | 7.8       | 266.7                        | 104.6     | 173              | 2.2       | NA          |  |
| Spot 72         | 243            | 45219                      | 0.7  | 20.0682                      | 5.2      | 0.1869                     | 5.6      | 0.0272                     | 2.2      | 0.39           | 173.0                      | 3.8       | 174.0                      | 9.0       | 187.1                        | 120.6     |                  |           |             |  |

|          |      |        |     |         |     |        |     |        |     |      |        |      |        |      |        |      |      |      |         |
|----------|------|--------|-----|---------|-----|--------|-----|--------|-----|------|--------|------|--------|------|--------|------|------|------|---------|
| Spot 37  | 904  | 61577  | 1.8 | 19.7226 | 1.2 | 0.2313 | 1.4 | 0.0331 | 0.5 | 0.40 | 209.8  | 1.1  | 211.3  | 2.6  | 227.4  | 28.8 | 210  | 1.1  | NA      |
| Spot 1   | 925  | 10475  | 1.7 | 19.3557 | 1.7 | 0.2359 | 2.8 | 0.0331 | 2.2 | 0.79 | 210.1  | 4.6  | 215.1  | 5.4  | 270.6  | 39.6 | 210  | 4.6  | NA      |
| Spot 111 | 863  | 97900  | 2.3 | 19.7264 | 1.1 | 0.2358 | 1.5 | 0.0337 | 1.0 | 0.64 | 213.9  | 2.0  | 215.0  | 2.9  | 226.9  | 26.3 | 214  | 2.0  | NA      |
| Spot 91  | 648  | 110676 | 1.3 | 19.6868 | 1.9 | 0.2383 | 2.0 | 0.0340 | 0.6 | 0.28 | 215.7  | 1.2  | 217.0  | 3.9  | 231.5  | 44.0 | 216  | 1.2  | NA      |
| Spot 70  | 880  | 123811 | 1.9 | 19.6718 | 1.0 | 0.2408 | 1.2 | 0.0344 | 0.6 | 0.53 | 217.7  | 1.3  | 219.1  | 2.3  | 233.3  | 23.0 | 218  | 1.3  | NA      |
| Spot 42  | 886  | 116888 | 1.9 | 19.8746 | 1.6 | 0.2405 | 1.7 | 0.0347 | 0.6 | 0.34 | 219.7  | 1.3  | 218.8  | 3.4  | 209.6  | 37.7 | 220  | 1.3  | NA      |
| Spot 98  | 874  | 242873 | 2.2 | 19.5513 | 1.0 | 0.2448 | 1.2 | 0.0347 | 0.7 | 0.59 | 220.0  | 1.5  | 222.3  | 2.4  | 247.5  | 22.5 | 220  | 1.5  | NA      |
| Spot 82  | 568  | 98522  | 1.7 | 19.3607 | 1.9 | 0.2492 | 2.9 | 0.0350 | 2.2 | 0.75 | 221.7  | 4.8  | 225.9  | 6.0  | 270.0  | 44.5 | 222  | 4.8  | NA      |
| Spot 69  | 578  | 86573  | 1.7 | 19.9361 | 2.3 | 0.2426 | 2.9 | 0.0351 | 1.8 | 0.61 | 222.2  | 3.9  | 220.5  | 5.8  | 202.4  | 54.0 | 222  | 3.9  | NA      |
| Spot 23  | 884  | 160034 | 1.9 | 19.6858 | 1.5 | 0.2469 | 1.6 | 0.0353 | 0.5 | 0.31 | 223.3  | 1.1  | 224.1  | 3.3  | 231.7  | 35.7 | 223  | 1.1  | NA      |
| Spot 64  | 734  | 102296 | 2.9 | 19.5899 | 1.1 | 0.2494 | 1.3 | 0.0354 | 0.7 | 0.53 | 224.5  | 1.5  | 226.1  | 2.6  | 242.9  | 25.2 | 224  | 1.5  | NA      |
| Spot 15  | 1394 | 199645 | 2.9 | 19.6858 | 0.9 | 0.2483 | 2.3 | 0.0354 | 2.1 | 0.92 | 224.6  | 4.6  | 225.2  | 4.6  | 231.6  | 21.4 | 225  | 4.6  | NA      |
| Spot 10  | 748  | 87528  | 1.8 | 19.8556 | 1.3 | 0.2476 | 1.7 | 0.0357 | 1.1 | 0.63 | 225.9  | 2.4  | 224.6  | 3.4  | 211.8  | 30.5 | 226  | 2.4  | NA      |
| Spot 63  | 525  | 152818 | 3.9 | 19.2432 | 1.6 | 0.2575 | 1.7 | 0.0359 | 0.5 | 0.31 | 227.6  | 1.2  | 232.7  | 3.5  | 283.9  | 36.5 | 228  | 1.2  | NA      |
| Spot 51  | 474  | 93774  | 2.0 | 19.4831 | 2.9 | 0.2569 | 3.0 | 0.0363 | 0.9 | 0.30 | 229.8  | 2.0  | 232.1  | 6.3  | 255.5  | 66.1 | 230  | 2.0  | NA      |
| Spot 94  | 393  | 45595  | 2.1 | 19.7832 | 2.1 | 0.2543 | 2.4 | 0.0365 | 1.2 | 0.49 | 231.0  | 2.7  | 230.1  | 5.0  | 220.3  | 49.1 | 231  | 2.7  | NA      |
| Spot 18  | 791  | 167917 | 1.6 | 19.4226 | 1.2 | 0.2599 | 1.3 | 0.0366 | 0.5 | 0.39 | 231.8  | 1.2  | 234.6  | 2.7  | 262.7  | 27.6 | 232  | 1.2  | NA      |
| Spot 47  | 264  | 59870  | 2.0 | 19.8320 | 3.7 | 0.2558 | 3.9 | 0.0368 | 1.0 | 0.26 | 232.9  | 2.3  | 231.3  | 8.0  | 214.6  | 86.5 | 233  | 2.3  | NA      |
| Spot 41  | 338  | 68111  | 2.0 | 20.1730 | 3.1 | 0.2515 | 3.3 | 0.0368 | 1.3 | 0.39 | 232.9  | 3.0  | 227.8  | 6.8  | 174.9  | 71.4 | 233  | 3.0  | NA      |
| Spot 90  | 1603 | 57200  | 2.4 | 19.5869 | 0.7 | 0.2595 | 1.0 | 0.0369 | 0.7 | 0.72 | 233.4  | 1.7  | 234.3  | 2.1  | 243.3  | 16.2 | 233  | 1.7  | NA      |
| Spot 103 | 985  | 38476  | 1.8 | 19.6913 | 0.9 | 0.2660 | 2.9 | 0.0380 | 2.8 | 0.95 | 240.4  | 6.5  | 239.5  | 6.2  | 231.0  | 21.5 | 240  | 6.5  | NA      |
| Spot 22  | 424  | 11583  | 1.6 | 18.9832 | 3.4 | 0.2796 | 3.9 | 0.0385 | 2.0 | 0.51 | 243.5  | 4.7  | 250.3  | 8.6  | 314.9  | 76.4 | 244  | 4.7  | NA      |
| Spot 45  | 170  | 125791 | 2.2 | 13.7505 | 1.3 | 1.6085 | 1.4 | 0.1604 | 0.5 | 0.36 | 959.1  | 4.4  | 973.5  | 8.6  | 1006.3 | 25.9 | 1006 | 25.9 | 95.309  |
| Spot 66  | 39   | 25712  | 1.4 | 13.2835 | 4.2 | 1.7578 | 4.4 | 0.1693 | 1.3 | 0.30 | 1008.5 | 12.5 | 1030.0 | 28.8 | 1076.0 | 85.1 | 1076 | 85.1 | 93.725  |
| Spot 74  | 179  | 114298 | 0.7 | 11.8481 | 0.6 | 2.4774 | 2.0 | 0.2129 | 1.9 | 0.96 | 1244.1 | 21.6 | 1265.4 | 14.4 | 1301.8 | 10.7 | 1302 | 10.7 | 95.570  |
| Spot 61  | 134  | 118340 | 0.9 | 9.8209  | 0.8 | 4.1220 | 1.7 | 0.2936 | 1.5 | 0.87 | 1659.5 | 21.4 | 1658.7 | 13.8 | 1657.6 | 15.6 | 1658 | 15.6 | 100.115 |
| Spot 8   | 111  | 224862 | 1.4 | 9.5533  | 0.4 | 4.2420 | 0.8 | 0.2939 | 0.6 | 0.82 | 1661.1 | 9.3  | 1682.2 | 6.4  | 1708.6 | 8.3  | 1709 | 8.3  | 97.218  |
| Spot 106 | 40   | 58175  | 0.8 | 9.3544  | 1.1 | 4.7642 | 2.5 | 0.3232 | 2.2 | 0.89 | 1805.5 | 34.4 | 1778.6 | 20.7 | 1747.2 | 20.7 | 1747 | 20.7 | 103.332 |
| Spot 96  | 223  | 368955 | 4.4 | 9.1911  | 0.4 | 5.0458 | 1.3 | 0.3364 | 1.2 | 0.96 | 1869.1 | 19.6 | 1827.1 | 10.7 | 1779.4 | 6.5  | 1779 | 6.5  | 105.041 |
| Spot 30  | 321  | 468606 | 5.1 | 9.1824  | 0.3 | 4.8141 | 0.8 | 0.3206 | 0.7 | 0.93 | 1792.7 | 11.2 | 1787.4 | 6.5  | 1781.1 | 5.3  | 1781 | 5.3  | 100.649 |

## ELM15MC-11

|          |      |        |     |         |       |         |       |        |      |      |       |     |        |        |        |        |      |     |    |
|----------|------|--------|-----|---------|-------|---------|-------|--------|------|------|-------|-----|--------|--------|--------|--------|------|-----|----|
| Spot 95  | 279  | 10950  | 1.3 | 21.8276 | 26.8  | 0.0329  | 27.1  | 0.0052 | 4.0  | 0.15 | 33.4  | 1.3 | 32.8   | 8.8    | -12.2  | 658.0  | 33.4 | 1.3 | NA |
| Spot 38  | 163  | 2366   | 1.2 | 11.0468 | 194.8 | 0.0660  | 195.0 | 0.0053 | 9.1  | 0.05 | 34.0  | 3.1 | 64.9   | 123.2  | 1436.6 | 543.9  | 34.0 | 3.1 | NA |
| Spot 63  | 353  | 9650   | 2.0 | 15.5105 | 55.2  | 0.0478  | 55.4  | 0.0054 | 4.8  | 0.09 | 34.6  | 1.7 | 47.5   | 25.7   | 757.1  | 1265.0 | 34.6 | 1.7 | NA |
| Spot 68  | 164  | 2639   | 1.5 | 6.2264  | 298.7 | 0.1193  | 298.8 | 0.0054 | 3.8  | 0.01 | 34.6  | 1.3 | 114.4  | 335.0  | 2462.0 | 166.5  | 34.6 | 1.3 | NA |
| Spot 25  | 235  | 6163   | 1.5 | 10.8608 | 39.0  | 0.0688  | 39.2  | 0.0054 | 4.2  | 0.11 | 34.9  | 1.5 | 67.6   | 25.6   | 1468.9 | 770.3  | 34.9 | 1.5 | NA |
| Spot 90  | 74   | 2035   | 1.3 | 5.9718  | 130.1 | 0.1257  | 130.8 | 0.0054 | 12.7 | 0.10 | 35.0  | 4.4 | 120.2  | 149.3  | 2532.3 | 503.6  | 35.0 | 4.4 | NA |
| Spot 66  | 183  | 4618   | 1.1 | 8.5882  | 147.4 | 0.0875  | 147.4 | 0.0054 | 3.6  | 0.02 | 35.0  | 1.3 | 85.1   | 121.0  | 1902.2 | 26.2   | 35.0 | 1.3 | NA |
| Spot 74  | 3355 | 77727  | 4.4 | 21.5725 | 4.0   | 0.0353  | 4.4   | 0.0055 | 1.9  | 0.43 | 35.5  | 0.7 | 35.2   | 1.5    | 16.1   | 96.2   | 35.5 | 0.7 | NA |
| Spot 54  | 76   | 1169   | 1.6 | 2.4058  | 194.9 | 0.3169  | 195.2 | 0.0055 | 10.1 | 0.05 | 35.5  | 3.6 | 279.5  | 517.5  | 3966.7 | 1119.3 | 35.5 | 3.6 | NA |
| Spot 106 | 2762 | 68344  | 5.0 | 20.5947 | 3.4   | 0.0372  | 3.6   | 0.0056 | 1.1  | 0.32 | 35.7  | 0.4 | 37.1   | 1.3    | 126.5  | 79.5   | 35.7 | 0.4 | NA |
| Spot 17  | 3454 | 29394  | 4.6 | 21.2955 | 1.4   | 0.0362  | 5.5   | 0.0056 | 5.3  | 0.97 | 35.9  | 1.9 | 36.1   | 1.9    | 47.1   | 32.5   | 35.9 | 1.9 | NA |
| Spot 9   | 1874 | 48769  | 4.7 | 20.9223 | 3.0   | 0.0369  | 3.1   | 0.0056 | 0.8  | 0.25 | 36.0  | 0.3 | 36.8   | 1.1    | 89.2   | 72.0   | 36.0 | 0.3 | NA |
| Spot 67  | 2336 | 79621  | 4.7 | 21.9982 | 10.9  | 0.0351  | 10.9  | 0.0056 | 0.6  | 0.06 | 36.0  | 0.2 | 35.0   | 3.7    | -31.0  | 264.0  | 36.0 | 0.2 | NA |
| Spot 52  | 100  | 5358   | 1.7 | -7.3268 | 249.2 | -0.1059 | 249.3 | 0.0056 | 6.9  | 0.03 | 36.2  | 2.5 | -113.6 | -308.9 | NA     | NA     | 36.2 | 2.5 | NA |
| Spot 109 | 2594 | 63666  | 3.9 | 21.0967 | 3.1   | 0.0370  | 3.3   | 0.0057 | 0.9  | 0.28 | 36.4  | 0.3 | 36.9   | 1.2    | 69.4   | 74.7   | 36.4 | 0.3 | NA |
| Spot 11  | 1757 | 40449  | 5.2 | 21.6874 | 3.1   | 0.0361  | 3.2   | 0.0057 | 1.0  | 0.30 | 36.5  | 0.4 | 36.0   | 1.1    | 3.3    | 73.9   | 36.5 | 0.4 | NA |
| Spot 112 | 169  | 5408   | 1.6 | 13.7040 | 139.1 | 0.0573  | 139.1 | 0.0057 | 4.3  | 0.03 | 36.6  | 1.6 | 56.6   | 76.7   | 1013.1 | 553.1  | 36.6 | 1.6 | NA |
| Spot 15  | 219  | 5451   | 2.8 | 31.2021 | 36.7  | 0.0271  | 37.8  | 0.0061 | 9.0  | 0.24 | 39.4  | 3.5 | 27.1   | 10.1   | -960.4 | 1108.7 | 39.4 | 3.5 | NA |
| Spot 104 | 3694 | 149514 | 2.9 | 21.3705 | 2.3   | 0.0428  | 4.0   | 0.0066 | 3.3  | 0.82 | 42.6  | 1.4 | 42.6   | 1.7    | 38.7   | 54.2   | 42.6 | 1.4 | NA |
| Spot 20  | 3705 | 29576  | 2.9 | 20.2755 | 2.8   | 0.0557  | 4.6   | 0.0082 | 3.6  | 0.78 | 52.6  | 1.9 | 55.1   | 2.5    | 163.1  | 66.5   | 52.6 | 1.9 | NA |
| Spot 110 | 242  | 9121   | 3.4 | 20.6300 | 10.3  | 0.1046  | 10.5  | 0.0156 | 2.1  | 0.20 | 100.1 | 2.1 | 101.0  | 10.1   | 122.4  | 243.4  | 100  | 2.1 | NA |
| Spot 78  | 315  | 11844  | 5.0 | 22.1694 | 22.7  | 0.0987  | 23.1  | 0.0159 | 4.4  | 0.19 | 101.5 | 4.4 | 95.6   | 21.1   | -49.8  | 558.3  | 101  | 4.4 | NA |
| Spot 101 | 148  | 6686   | 1.6 | 20.9562 | 14.9  | 0.1103  | 15.1  | 0.0168 | 2.6  | 0.17 | 107.2 | 2.7 | 106.2  | 15.3   | 85.4   | 355.5  | 107  | 2.7 | NA |
| Spot 41  | 70   | 1831   | 1.3 | 13.4608 | 39.5  | 0.2480  | 39.7  | 0.0242 | 3.7  | 0.09 | 154.2 | 5.6 | 224.9  | 80.2   | 1049.4 | 828.7  | 154  | 5.6 | NA |
| Spot 96  | 949  | 34279  | 1.5 | 20.4279 | 1.1   | 0.1668  | 2.1   | 0.0247 | 1.7  | 0.85 | 157.4 | 2.7 | 156.7  | 3.0    | 145.5  | 25.7   | 157  | 2.7 | NA |
| Spot 48  | 111  | 12783  | 0.7 | 18.3249 | 48.2  | 0.1863  | 48.2  | 0.0248 | 1.8  | 0.04 | 157.7 | 2.8 | 173.5  | 77.0   | 394.6  | 1144.5 | 158  | 2.8 | NA |
| Spot 31  | 122  | 7918   | 0.7 | 20.8989 | 14.9  | 0.1643  | 15.1  | 0.0249 | 2.3  | 0.15 | 158.6 | 3.6 | 154.5  | 21.6   | 91.8   | 354.1  | 159  | 3.6 | NA |
| Spot 35  | 171  | 27678  | 0.8 | 20.4185 | 25.8  | 0.1684  | 25.8  | 0.0249 | 1.3  | 0.05 | 158.8 | 2.0 | 158.0  | 37.8   | 146.7  | 614.2  | 159  | 2.0 | NA |
| Spot 13  | 315  | 16766  | 1.5 | 20.8542 | 4.0   | 0.1653  | 4.1   | 0.0250 | 0.8  | 0.20 | 159.2 | 1.3 | 155.3  | 5.9    | 96.9   | 95.2   | 159  | 1.3 | NA |
| Spot 105 | 196  | 3352   | 0.8 | 19.1089 | 11.6  | 0.1822  | 11.7  | 0.0253 | 1.7  | 0.15 | 160.8 | 2.8 | 170.0  | 18.4   | 299.9  | 265.2  | 161  | 2.8 | NA |
| Spot 60  | 585  | 26609  | 1.9 | 19.8994 | 6.4   | 0.1755  | 6.5   | 0.0253 | 0.9  | 0.14 | 161.2 | 1.4 | 164.2  | 9.8    | 206.7  | 149.1  | 161  | 1.4 | NA |
| Spot 57  | 208  | 6867   | 0.9 | 23.4192 | 47.1  | 0.1500  | 47.3  | 0.0255 | 4.1  | 0.09 | 162.2 | 6.5 | 141.9  | 62.7   | -185.0 | 1238.4 | 162  | 6.5 | NA |
| Spot 36  | 160  | 11920  | 0.9 | 21.3821 | 18.7  | 0.1646  | 19.0  | 0.0255 | 2.9  | 0.15 | 162.4 | 4.7 | 154.7  | 27.2   | 37.4   | 451.7  | 162  | 4.7 | NA |
| Spot 115 | 172  | 36780  | 0.8 | 20.1562 | 7.8   | 0.1746  | 8.0   | 0.0255 | 1.7  | 0.21 | 162.5 | 2.7 | 163.4  | 12.0   | 176.9  | 181.6  | 162  | 2.7 | NA |
| Spot 18  | 137  | 12697  | 0.7 | 20.3648 | 8.3   | 0.1729  | 8.3   | 0.0255 | 1.1  | 0.14 | 162.6 | 1.8 | 161.9  | 12.5   | 152.8  | 193.8  | 163  | 1.8 | NA |
| Spot 73  | 1067 | 78288  | 2.1 | 20.0220 | 3.6   | 0.1769  | 3.7   | 0.0257 | 0.5  | 0.13 | 163.5 | 0.8 | 165.4  | 5.6    | 192.5  | 84.8   | 163  | 0.8 | NA |
| Spot 108 | 660  | 17798  | 2.0 | 20.3839 | 2.8   | 0.1744  | 3.2   | 0.0258 | 1.5  | 0.48 | 164.1 | 2.5 | 163.3  | 4.9    | 150.6  | 66.2   | 164  | 2.5 | NA |
| Spot 19  | 468  | 54448  | 1.3 | 20.3841 | 13.0  | 0.1745  | 13.0  | 0.0258 | 0.7  | 0.05 | 164.2 | 1.2 | 163.3  | 19.7   | 150.6  | 306.3  | 164  | 1.2 | NA |
| Spot 75  | 534  | 182879 | 1.1 | 20.4307 | 4.4   | 0.1741  | 4.4   | 0.0258 | 0.6  | 0.13 | 164.2 | 0.9 | 163.0  | 6.7    | 145.2  | 103.5  | 164  | 0.9 | NA |
| Spot 69  | 352  | 33389  | 1.1 | 21.7416 | 15.1  | 0.1642  | 15.1  | 0.0259 | 0.9  | 0.06 | 164.8 | 1.4 | 154.4  | 21.6   | -2.6   | 365.5  | 165  | 1.4 | NA |
| Spot 51  | 96   | 7615   | 1.5 | 28.8343 | 67.5  | 0.1240  | 67.5  | 0.0259 | 2.0  | 0.03 | 165.1 | 3.3 | 118.7  | 75.8   | -734.2 | 2115.8 | 165  | 3.3 | NA |
| Spot 92  | 85   | 4237   | 1.0 | 24.9500 | 20.5  | 0.1439  | 20.7  | 0.0260 | 3.3  | 0.16 | 165.7 | 5.3 | 136.5  | 26.5   | -345.8 | 532.3  | 166  | 5.3 | NA |
| Spot 23  | 462  | 7625   | 1.0 | 23.4366 | 8.9   | 0.1532  | 8.9   | 0.0260 | 0.5  | 0.06 | 165.8 | 0.8 | 144.8  | 12.0   | -186.9 | 221.5  | 166  | 0.8 | NA |
| Spot 94  | 568  | 65566  | 1.1 | 20.2575 | 2.9   | 0.1777  | 3.0   | 0.0261 | 0.9  | 0.28 | 166.1 | 1.4 | 166.0  | 4.7    | 165.2  | 68.2   | 166  | 1.4 | NA |
| Spot 64  | 695  | 65335  | 1.6 | 20.5940 | 8.9   | 0.1763  | 9.0   | 0.0263 | 1.4  | 0.15 | 167.5 | 2.3 | 164.8  | 13.7   | 126.6  | 209.3  | 168  | 2.3 | NA |
| Spot 116 | 247  | 13503  | 0.7 | 19.3149 | 7.4   | 0.1895  | 7.5   | 0.0265 | 1.4  | 0.19 | 168.9 | 2.3 | 176.2  | 12.1   | 275.4  | 169.2  | 169  | 2.3 | NA |
| Spot 5   | 147  | 9129   | 1.5 | 20.4916 | 8.0   | 0.1787  | 8.4   | 0.0266 | 2.4  | 0.28 | 169.0 | 4.0 | 166.9  | 12.9   | 138.2  | 189.3  | 169  | 4.0 | NA |
| Spot 1   | 646  | 30862  | 2.1 | 20.1322 | 1.9   | 0.1821  | 2.0   | 0.0266 | 0.7  | 0.34 | 169.1 | 1.1 | 169.8  | 3.2    | 179.6  | 44.5   | 169  | 1.1 | NA |
| Spot 117 | 320  | 26482  | 1.7 | 20.0100 | 4.7   | 0.1847  | 4.9   | 0.0268 | 1.2  | 0.25 | 170.5 | 2.0 | 172.1  | 7.7    | 193.8  | 109.5  | 171  | 2.0 | NA |
| Spot 8   | 93   | 285    | 1.1 | 17.6502 | 33.3  | 0.2097  | 33.4  | 0.0268 | 3.2  | 0.09 | 170.7 | 5.3 | 193.3  | 58.9   | 478.2  | 754.7  | 171  | 5.3 | NA |
| Spot 103 | 149  | 11624  | 1.1 | 19.9562 | 7.3   | 0.1866  | 7.5   | 0.0270 | 1.6  | 0.22 | 171.8 | 2.8 | 173.7  | 12.0   | 200.1  | 170.2  | 172  | 2.8 | NA |
| Spot 82  | 114  | 10502  | 1.9 | 20.1779 | 22.9  | 0.1858  | 22.9  | 0.0272 | 1.1  | 0.05 | 173.0 | 1.9 | 173.0  | 36.5   | 174.3  | 539.9  | 173  | 1.9 | NA |
| Spot 86  | 273  | 18236  | 1.0 | 19.7814 | 7.9   | 0.1900  | 8.1   | 0.0273 | 1.7  | 0.21 | 173.3 | 3.0 | 176.6  | 13.1   | 220.5  | 183.0  | 173  | 3.0 | NA |
| Spot 114 | 288  | 27448  | 0.9 | 20.2869 | 6.2   | 0.1869  | 6.2   | 0.0275 | 0.7  | 0.12 | 174.9 | 1.3 | 174.0  | 9.9    | 161.8  | 144.1  | 175  | 1.3 | NA |
| Spot 2   | 100  | 23425  | 1.1 | 19.2611 | 7.8   | 0.1969  | 8.3   | 0.0275 | 2.9  | 0.35 | 175.0 | 5.1 | 182.5  | 13.9   | 281.8  | 178.9  | 175  | 5.1 | NA |
| Spot 85  | 266  | 44303  | 1.4 | 20.7185 | 7.1   | 0.1855  | 7.2   | 0.0279 | 0.9  | 0.12 | 177.2 | 1.5 | 172.8  | 11.4   | 112.3  | 168.4  | 177  | 1.5 | NA |
| Spot 40  | 367  | 17216  | 0.8 | 20.3385 | 8.6   | 0.1898  | 8.8   | 0.0280 | 1.8  | 0.21 | 178.0 | 3.2 | 176.4  | 14.2   | 155.8  | 200.7  | 178  | 3.2 | NA |
| Spot 33  | 678  | 103939 | 3.2 | 19.4617 | 1.9   | 0.2423  | 3.3   | 0.0342 | 2.7  | 0.81 | 216.8 | 5.7 | 220.3  | 6.5    | 258.1  | 44.7   | 217  | 5.7 | NA |
| Spot 3   | 889  | 5810   | 1.1 | 18.9042 | 5.5   | 0.2551  | 6.7   | 0.0350 | 3.9  | 0.58 | 221.6 | 8.5 | 230.7  | 13.9   | 324.4  | 124.1  | 222  | 8.5 | NA |
| Spot 84  | 664  | 88728  | 2.1 | 20.2104 | 3.9   | 0.2390  | 4.7   | 0.0350 | 2.7  | 0.57 | 222.0 | 5.9 | 217.6  | 9.3    | 170.6  | 91.0   | 222  | 5.9 | NA |
| Spot 111 | 446  | 58492  | 2.6 | 19.5155 | 2.3   | 0.2492  | 2.5   | 0.0353 | 0.9  | 0.35 | 223.5 | 1.9 | 225.9  | 5.1    | 251.7  | 54.0   | 223  | 1.9 | NA |
| Spot 100 | 474  | 77280  | 2.3 | 19.5280 | 3.1   | 0.2556  | 3.3   | 0.0362 | 0.9  | 0.27 | 229.2 | 1.9 | 231.1  | 6.7    | 250.2  | 72.5   | 229  | 1.9 | NA |
| Spot 14  | 620  | 35343  | 2.6 | 19.2497 | 2.1   | 0.2605  | 2.9   | 0.0364 | 2.0  | 0.67 | 230.3 | 4.4 | 235.1  | 6.1    | 283.2  | 49.1   | 230  | 4.4 | NA |

|          |      |        |      |         |      |         |      |        |     |      |        |       |        |      |        |       |      |       |     |
|----------|------|--------|------|---------|------|---------|------|--------|-----|------|--------|-------|--------|------|--------|-------|------|-------|-----|
| Spot 72  | 1243 | 252632 | 1.1  | 19.3176 | 2.0  | 0.3114  | 2.1  | 0.0436 | 0.5 | 0.25 | 275.2  | 1.4   | 275.2  | 5.0  | 275.1  | 45.9  | 275  | 1.4   | NA  |
| Spot 49  | 130  | 17771  | 1.0  | 19.0310 | 25.1 | 0.4613  | 25.2 | 0.0637 | 1.4 | 0.06 | 397.9  | 5.5   | 385.1  | 80.9 | 309.2  | 580.5 | 398  | 5.5   | NA  |
| Spot 97  | 144  | 21060  | 0.9  | 17.6858 | 4.7  | 0.5195  | 5.6  | 0.0666 | 3.1 | 0.55 | 415.8  | 12.4  | 424.8  | 19.5 | 473.7  | 104.1 | 416  | 12.4  | 88  |
| Spot 91  | 179  | 129344 | 10.8 | 17.9312 | 2.7  | 0.5577  | 2.9  | 0.0725 | 0.9 | 0.31 | 451.4  | 3.9   | 450.0  | 10.5 | 443.2  | 60.9  | 451  | 3.9   | 102 |
| Spot 98  | 40   | 16181  | 1.9  | 17.1134 | 10.1 | 0.7781  | 10.5 | 0.0967 | 2.9 | 0.28 | 594.3  | 16.7  | 584.4  | 46.7 | 546.0  | 220.7 | 594  | 16.7  | 109 |
| Spot 83  | 80   | 58446  | 2.0  | 14.0679 | 4.1  | 1.5754  | 4.5  | 0.1660 | 1.8 | 0.41 | 960.9  | 16.2  | 960.6  | 27.7 | 959.8  | 83.3  | 960  | 83.3  | 100 |
| Spot 76  | 133  | 87439  | 2.1  | 13.8107 | 3.9  | 1.6658  | 3.9  | 0.1668 | 0.6 | 0.15 | 994.7  | 5.4   | 995.6  | 24.7 | 997.4  | 78.3  | 997  | 78.3  | 100 |
| Spot 88  | 92   | 52105  | 1.9  | 13.8042 | 1.5  | 1.7055  | 1.9  | 0.1707 | 1.2 | 0.61 | 1016.2 | 11.0  | 1010.6 | 12.2 | 998.4  | 30.7  | 998  | 30.7  | 102 |
| Spot 80  | 123  | 118650 | 2.4  | 13.4196 | 1.5  | 1.8217  | 1.8  | 0.1773 | 1.0 | 0.56 | 1052.2 | 9.6   | 1053.3 | 11.6 | 1055.5 | 29.7  | 1056 | 29.7  | 100 |
| Spot 70  | 174  | 161589 | 3.1  | 13.2033 | 1.2  | 1.9895  | 1.5  | 0.1905 | 0.8 | 0.55 | 1124.1 | 8.4   | 1111.9 | 9.9  | 1088.2 | 24.6  | 1088 | 24.6  | 103 |
| Spot 102 | 136  | 152037 | 2.0  | 13.1886 | 0.9  | 1.9740  | 1.8  | 0.1888 | 1.6 | 0.87 | 1115.0 | 16.3  | 1106.7 | 12.4 | 1090.4 | 18.4  | 1090 | 18.4  | 102 |
| Spot 93  | 30   | 24063  | 1.1  | 13.0606 | 6.1  | 1.9420  | 6.2  | 0.1840 | 1.3 | 0.22 | 1088.5 | 13.4  | 1095.7 | 41.6 | 1109.9 | 121.1 | 1110 | 121.1 | 98  |
| Spot 27  | 119  | 75515  | 2.0  | 13.0380 | 5.1  | 2.0679  | 5.1  | 0.1955 | 0.8 | 0.16 | 1151.3 | 8.8   | 1138.2 | 35.2 | 1113.4 | 101.3 | 1113 | 101.3 | 103 |
| Spot 120 | 53   | 39209  | 2.1  | 12.9782 | 1.6  | 2.0451  | 1.8  | 0.1925 | 0.8 | 0.46 | 1134.9 | 8.5   | 1130.6 | 12.0 | 1122.5 | 31.2  | 1123 | 31.2  | 101 |
| Spot 56  | 524  | 38200  | 1.9  | 12.7833 | 1.3  | 1.7886  | 4.6  | 0.1658 | 4.4 | 0.96 | 989.1  | 40.3  | 1041.3 | 29.9 | 1152.6 | 25.9  | 1153 | 25.9  | 86  |
| Spot 107 | 41   | 57970  | 2.6  | 12.7632 | 4.8  | 2.1847  | 5.0  | 0.2022 | 1.1 | 0.23 | 1187.3 | 12.3  | 1176.2 | 34.6 | 1155.7 | 95.9  | 1156 | 95.9  | 103 |
| Spot 87  | 231  | 95662  | 5.0  | 12.1056 | 0.8  | 2.1679  | 2.9  | 0.1903 | 2.8 | 0.96 | 1123.2 | 28.6  | 1170.8 | 20.2 | 1259.9 | 16.5  | 1260 | 16.5  | 89  |
| Spot 47  | 37   | 34764  | 1.0  | 12.0701 | 7.1  | 2.6077  | 7.1  | 0.2283 | 0.6 | 0.08 | 1325.5 | 7.0   | 1302.8 | 52.1 | 1265.6 | 138.1 | 1266 | 138.1 | 105 |
| Spot 22  | 169  | 231756 | 2.3  | 11.6544 | 0.5  | 2.7373  | 0.6  | 0.2314 | 0.4 | 0.62 | 1341.7 | 4.5   | 1338.6 | 4.5  | 1333.8 | 9.1   | 1334 | 9.1   | 101 |
| Spot 99  | 82   | 60201  | 1.4  | 11.3826 | 1.3  | 2.7971  | 1.4  | 0.2309 | 0.6 | 0.42 | 1339.3 | 7.3   | 1354.8 | 10.7 | 1379.3 | 24.9  | 1379 | 24.9  | 97  |
| Spot 55  | 392  | 97807  | 2.2  | 11.3711 | 0.9  | 2.6701  | 1.9  | 0.2202 | 1.6 | 0.87 | 1282.9 | 18.9  | 1320.2 | 13.8 | 1381.2 | 17.8  | 1381 | 17.8  | 93  |
| Spot 53  | 42   | 34550  | 1.3  | 11.1115 | 8.2  | 3.0774  | 8.4  | 0.2480 | 1.5 | 0.18 | 1428.2 | 19.1  | 1427.1 | 64.2 | 1425.4 | 157.4 | 1425 | 157.4 | 100 |
| Spot 24  | 375  | 236896 | 2.6  | 10.9786 | 0.8  | 2.7955  | 1.1  | 0.2226 | 0.8 | 0.70 | 1295.5 | 9.2   | 1354.3 | 8.4  | 1448.4 | 15.3  | 1448 | 15.3  | 89  |
| Spot 29  | 16   | 20298  | 2.1  | 10.8846 | 9.6  | 3.2196  | 9.8  | 0.2542 | 1.7 | 0.18 | 1459.9 | 22.6  | 1461.9 | 76.0 | 1464.7 | 183.4 | 1465 | 183.4 | 100 |
| Spot 118 | 22   | 21887  | 0.8  | 10.0113 | 3.0  | 3.9388  | 3.1  | 0.2860 | 0.8 | 0.25 | 1621.5 | 11.2  | 1621.7 | 25.1 | 1622.0 | 55.8  | 1622 | 55.8  | 100 |
| Spot 10  | 360  | 10688  | 1.9  | 9.8450  | 0.5  | 3.3489  | 4.4  | 0.2391 | 4.4 | 0.99 | 1382.1 | 55.0  | 1492.5 | 34.8 | 1653.1 | 8.9   | 1653 | 8.9   | 84  |
| Spot 21  | 23   | 29835  | 0.9  | 9.7275  | 2.0  | 4.2389  | 2.8  | 0.2991 | 1.9 | 0.70 | 1686.6 | 28.7  | 1681.6 | 22.7 | 1675.3 | 36.6  | 1675 | 36.6  | 101 |
| Spot 89  | 43   | 57803  | 2.2  | 9.6197  | 1.4  | 4.3544  | 1.6  | 0.3038 | 0.7 | 0.44 | 1710.1 | 10.7  | 1703.7 | 13.3 | 1695.9 | 26.6  | 1696 | 26.6  | 101 |
| Spot 77  | 274  | 360499 | 2.1  | 9.5705  | 0.4  | 4.4184  | 0.7  | 0.3067 | 0.5 | 0.80 | 1724.4 | 8.3   | 1715.8 | 5.7  | 1705.3 | 7.6   | 1705 | 7.6   | 101 |
| Spot 59  | 57   | 41449  | 2.4  | 9.4854  | 6.0  | 4.2638  | 6.2  | 0.2933 | 1.5 | 0.24 | 1658.1 | 21.4  | 1686.4 | 50.9 | 1721.7 | 110.4 | 1722 | 110.4 | 96  |
| Spot 46  | 202  | 464634 | 2.9  | 9.4517  | 1.3  | 4.5053  | 1.5  | 0.3088 | 0.8 | 0.53 | 1735.0 | 12.5  | 1732.0 | 12.8 | 1728.3 | 24.0  | 1728 | 24.0  | 100 |
| Spot 39  | 225  | 32950  | 1.8  | 9.3856  | 1.1  | 3.8476  | 2.6  | 0.2619 | 2.4 | 0.90 | 1499.6 | 31.7  | 1602.8 | 21.2 | 1741.1 | 21.0  | 1741 | 21.0  | 86  |
| Spot 37  | 346  | 35888  | 1.9  | 9.2144  | 0.3  | 4.2953  | 4.2  | 0.2871 | 4.2 | 1.00 | 1626.8 | 60.2  | 1692.5 | 34.6 | 1774.8 | 4.6   | 1775 | 4.6   | 92  |
| Spot 43  | 310  | 475980 | 3.0  | 9.1422  | 0.7  | 4.9374  | 1.0  | 0.3274 | 0.7 | 0.67 | 1825.6 | 10.5  | 1808.7 | 8.3  | 1789.1 | 13.2  | 1789 | 13.2  | 102 |
| Spot 30  | 251  | 16380  | 1.9  | 9.0607  | 0.5  | 4.6391  | 1.6  | 0.3049 | 1.5 | 0.96 | 1715.3 | 22.8  | 1756.3 | 13.2 | 1805.4 | 8.2   | 1805 | 8.2   | 95  |
| Spot 4   | 71   | 104033 | 1.6  | 8.8722  | 0.5  | 5.1493  | 0.9  | 0.3313 | 0.7 | 0.77 | 1844.9 | 10.5  | 1844.3 | 7.3  | 1843.6 | 9.9   | 1844 | 9.9   | 100 |
| Spot 26  | 41   | 32403  | 0.7  | 8.8688  | 6.4  | 5.1933  | 6.4  | 0.3340 | 0.6 | 0.09 | 1858.0 | 8.9   | 1851.5 | 54.8 | 1844.3 | 116.1 | 1844 | 116.1 | 101 |
| Spot 32  | 42   | 115577 | 1.0  | 8.8201  | 1.6  | 5.0480  | 1.8  | 0.3229 | 0.7 | 0.40 | 1804.0 | 11.3  | 1827.4 | 15.1 | 1854.2 | 29.5  | 1854 | 29.5  | 97  |
| Spot 42  | 169  | 282412 | 1.6  | 8.7118  | 1.8  | 5.3868  | 1.9  | 0.3404 | 0.5 | 0.26 | 1888.4 | 7.8   | 1882.8 | 16.0 | 1876.5 | 32.6  | 1877 | 32.6  | 101 |
| Spot 44  | 216  | 237016 | 2.5  | 8.7075  | 1.0  | 5.5156  | 1.1  | 0.3483 | 0.3 | 0.32 | 1926.6 | 5.7   | 1903.0 | 9.3  | 1877.4 | 18.5  | 1877 | 18.5  | 103 |
| Spot 71  | 239  | 298157 | 0.8  | 8.4580  | 0.6  | 5.7709  | 0.7  | 0.3540 | 0.4 | 0.55 | 1953.7 | 6.2   | 1942.0 | 5.8  | 1929.6 | 10.0  | 1930 | 10.0  | 101 |
| Spot 79  | 51   | 193694 | 1.0  | 8.4434  | 2.4  | 5.7541  | 2.7  | 0.3524 | 1.0 | 0.39 | 1945.9 | 17.6  | 1939.5 | 23.0 | 1932.7 | 43.8  | 1933 | 43.8  | 101 |
| Spot 7   | 122  | 121735 | 1.4  | 8.0345  | 0.3  | 6.3140  | 0.6  | 0.3679 | 0.5 | 0.83 | 2019.6 | 8.4   | 2020.4 | 5.1  | 2021.2 | 5.8   | 2021 | 5.8   | 100 |
| Spot 65  | 28   | 59123  | 1.0  | 7.9217  | 6.1  | 6.7843  | 6.2  | 0.3898 | 1.1 | 0.19 | 2121.8 | 20.8  | 2083.7 | 55.0 | 2046.2 | 107.9 | 2046 | 107.9 | 104 |
| Spot 45  | 183  | 191481 | 1.9  | 7.6658  | 1.1  | 7.0575  | 1.2  | 0.3924 | 0.5 | 0.41 | 2133.9 | 9.3   | 2118.7 | 11.0 | 2104.0 | 19.8  | 2104 | 19.8  | 101 |
| Spot 34  | 211  | 289527 | 11.5 | 5.8440  | 0.2  | 11.0021 | 1.3  | 0.4663 | 1.2 | 0.99 | 2467.4 | 25.5  | 2523.3 | 11.8 | 2568.6 | 3.6   | 2569 | 3.6   | 96  |
| Spot 50  | 153  | 108319 | 1.3  | 5.7737  | 0.7  | 10.5207 | 1.7  | 0.4406 | 1.6 | 0.92 | 2353.1 | 30.6  | 2481.7 | 15.7 | 2588.8 | 11.3  | 2589 | 11.3  | 91  |
| Spot 6   | 44   | 124616 | 1.6  | 5.3710  | 0.7  | 13.6399 | 0.8  | 0.5313 | 0.5 | 0.56 | 2747.1 | 10.2  | 2725.0 | 7.7  | 2708.7 | 11.1  | 2709 | 11.1  | 101 |
| Spot 81  | 38   | 54678  | 1.6  | 4.6625  | 1.4  | 13.7435 | 8.0  | 0.4647 | 7.8 | 0.99 | 2460.5 | 160.3 | 2732.2 | 75.4 | 2939.7 | 22.1  | 2940 | 22.1  | 84  |

## ELM15MC-12

|          |      |       |     |         |       |         |       |        |     |      |       |      |       |       |        |        |      |      |    |
|----------|------|-------|-----|---------|-------|---------|-------|--------|-----|------|-------|------|-------|-------|--------|--------|------|------|----|
| Spot 60  | 326  | 14134 | 1.4 | 47.6249 | 113.1 | 0.0145  | 113.3 | 0.0050 | 6.6 | 0.06 | 32.2  | 2.1  | 14.6  | 16.4  | NA     | NA     | 32.2 | 2.1  | NA |
| Spot 90  | 277  | 19293 | 1.3 | 26.1149 | 72.6  | 0.0271  | 72.8  | 0.0051 | 5.5 | 0.08 | 33.0  | 1.8  | 27.2  | 19.5  | -464.9 | 2214.7 | 33.0 | 1.8  | NA |
| Spot 62  | 301  | 21077 | 2.2 | 28.1506 | 99.0  | 0.0253  | 99.1  | 0.0052 | 3.1 | 0.03 | 33.2  | 1.0  | 25.3  | 24.8  | -667.5 | NA     | 33.2 | 1.0  | NA |
| Spot 89  | 139  | 3111  | 1.5 | 15.2951 | 137.8 | 0.0467  | 137.9 | 0.0052 | 5.0 | 0.04 | 33.3  | 1.7  | 46.4  | 62.6  | 786.6  | 718.1  | 33.3 | 1.7  | NA |
| Spot 13  | 1051 | 17170 | 1.6 | 21.4994 | 15.0  | 0.0334  | 15.0  | 0.0052 | 1.3 | 0.08 | 33.5  | 0.4  | 33.4  | 4.9   | 24.3   | 361.2  | 33.5 | 0.4  | NA |
| Spot 66  | 212  | 6879  | 1.7 | 26.8001 | 44.9  | 0.0268  | 45.1  | 0.0052 | 4.1 | 0.09 | 33.5  | 1.4  | 26.9  | 12.0  | -533.9 | 1258.7 | 33.5 | 1.4  | NA |
| Spot 36  | 263  | 15373 | 2.2 | 14.1509 | 122.6 | 0.0508  | 122.6 | 0.0052 | 1.9 | 0.02 | 33.5  | 0.6  | 50.3  | 60.3  | 947.8  | 494.2  | 33.5 | 0.6  | NA |
| Spot 111 | 331  | 9204  | 1.9 | 28.6254 | 59.6  | 0.0252  | 59.6  | 0.0052 | 2.6 | 0.04 | 33.6  | 0.9  | 25.2  | 14.9  | -713.9 | 1802.9 | 33.6 | 0.9  | NA |
| Spot 88  | 290  | 11862 | 1.7 | 15.9952 | 24.4  | 0.0453  | 24.4  | 0.0053 | 2.1 | 0.09 | 33.8  | 0.7  | 44.9  | 10.7  | 691.9  | 526.6  | 33.8 | 0.7  | NA |
| Spot 14  | 238  | 9022  | 2.2 | 14.2382 | 106.7 | 0.0510  | 106.8 | 0.0053 | 4.8 | 0.04 | 33.9  | 1.6  | 50.5  | 52.7  | 935.2  | 396.1  | 33.9 | 1.6  | NA |
| Spot 80  | 253  | 10372 | 1.7 | 24.8023 | 51.4  | 0.0293  | 51.7  | 0.0053 | 5.9 | 0.11 | 33.9  | 2.0  | 29.3  | 14.9  | -330.5 | 1403.5 | 33.9 | 2.0  | NA |
| Spot 95  | 208  | 15057 | 2.5 | 8.2421  | 146.8 | 0.0888  | 146.9 | 0.0053 | 6.3 | 0.04 | 34.1  | 2.2  | 86.4  | 122.2 | 1975.8 | 77.7   | 34.1 | 2.2  | NA |
| Spot 40  | 274  | 16029 | 0.9 | 26.0197 | 34.8  | 0.0282  | 35.5  | 0.0053 | 7.0 | 0.20 | 34.2  | 2.4  | 28.2  | 9.9   | -455.3 | 940.6  | 34.2 | 2.4  | NA |
| Spot 19  | 251  | 11593 | 2.1 | 18.1598 | 43.8  | 0.0405  | 44.2  | 0.0053 | 6.1 | 0.14 | 34.3  | 2.1  | 40.3  | 17.5  | 414.9  | 1025.6 | 34.3 | 2.1  | NA |
| Spot 20  | 219  | 4680  | 2.3 | 19.6518 | 43.7  | 0.0374  | 43.9  | 0.0053 | 4.2 | 0.10 | 34.3  | 1.5  | 37.3  | 16.1  | 235.7  | 1054.0 | 34.3 | 1.5  | NA |
| Spot 8   | 257  | 5421  | 1.6 | 18.0828 | 29.1  | 0.0409  | 29.3  | 0.0054 | 3.5 | 0.12 | 34.5  | 1.2  | 40.7  | 11.7  | 424.4  | 662.8  | 34.5 | 1.2  | NA |
| Spot 12  | 733  | 44823 | 3.2 | 23.9240 | 17.0  | 0.0311  | 17.0  | 0.0054 | 1.4 | 0.08 | 34.6  | 0.5  | 31.1  | 5.2   | -238.6 | 430.6  | 34.6 | 0.5  | NA |
| Spot 96  | 562  | 3981  | 0.7 | 16.6858 | 31.5  | 0.0449  | 31.7  | 0.0054 | 3.8 | 0.12 | 34.9  | 1.3  | 44.6  | 13.8  | 601.1  | 698.1  | 34.9 | 1.3  | NA |
| Spot 38  | 153  | 7462  | 2.3 | 16.2041 | 57.3  | 0.0462  | 57.5  | 0.0054 | 3.9 | 0.07 | 34.9  | 1.4  | 45.9  | 25.8  | 664.2  | 1343.0 | 34.9 | 1.4  | NA |
| Spot 104 | 198  | 13846 | 2.0 | 9.6748  | 172.0 | 0.0775  | 172.0 | 0.0054 | 4.8 | 0.03 | 34.9  | 1.7  | 75.7  | 126.2 | 1685.3 | 242.4  | 34.9 | 1.7  | NA |
| Spot 81  | 486  | 20761 | 1.6 | 21.1561 | 18.4  | 0.0354  | 18.7  | 0.0054 | 3.3 | 0.18 | 35.0  | 1.1  | 35.4  | 6.5   | 62.7   | 440.9  | 35.0 | 1.1  | NA |
| Spot 15  | 398  | 20703 | 2.0 | 24.6797 | 20.0  | 0.0304  | 20.2  | 0.0054 | 2.2 | 0.11 | 35.0  | 0.8  | 30.4  | 6.0   | -317.8 | 518.0  | 35.0 | 0.8  | NA |
| Spot 24  | 274  | 23250 | 1.6 | 18.8330 | 38.3  | 0.0399  | 38.6  | 0.0054 | 4.7 | 0.12 | 35.0  | 1.6  | 39.7  | 15.0  | 333.0  | 899.3  | 35.0 | 1.6  | NA |
| Spot 100 | 220  | 8400  | 1.7 | 26.2146 | 62.1  | 0.0291  | 62.8  | 0.0055 | 9.3 | 0.15 | 35.6  | 3.3  | 29.1  | 18.0  | -475.0 | 1808.1 | 35.6 | 3.3  | NA |
| Spot 93  | 130  | 5360  | 0.9 | 9.9583  | 99.5  | 0.0773  | 99.8  | 0.0056 | 7.1 | 0.07 | 35.9  | 2.5  | 75.6  | 72.8  | 1631.8 | NA     | 35.9 | 2.5  | NA |
| Spot 6   | 144  | 6678  | 0.9 | 19.5767 | 40.3  | 0.0396  | 40.5  | 0.0056 | 3.9 | 0.10 | 36.2  | 1.4  | 39.5  | 15.7  | 244.5  | 964.1  | 36.2 | 1.4  | NA |
| Spot 110 | 257  | 14921 | 2.8 | 40.6942 | 70.2  | 0.0191  | 70.5  | 0.0056 | 5.4 | 0.08 | 36.3  | 1.9  | 19.2  | 13.4  | NA     | NA     | 36.3 | 1.9  | NA |
| Spot 94  | 211  | 12073 | 0.5 | 25.7303 | 43.6  | 0.0306  | 43.9  | 0.0057 | 5.7 | 0.13 | 36.7  | 2.1  | 30.6  | 13.2  | -425.8 | 1190.4 | 36.7 | 2.1  | NA |
| Spot 107 | 115  | 6145  | 1.3 | 22.1319 | 70.6  | 0.0357  | 71.0  | 0.0057 | 7.5 | 0.11 | 36.9  | 2.8  | 35.6  | 24.9  | -45.7  | 1972.7 | 36.9 | 2.8  | NA |
| Spot 99  | 67   | 3131  | 0.6 | -0.7035 | 832.4 | -1.1251 | 832.5 | 0.0057 | 9.4 | 0.01 | 36.9  | 3.4  | NA    | NA    | NA     | NA     | 36.9 | 3.4  | NA |
| Spot 33  | 104  | 13252 | 1.2 | 17.9993 | 29.0  | 0.1058  | 29.1  | 0.0138 | 2.3 | 0.08 | 88.4  | 2.0  | 102.1 | 28.3  | 434.7  | 659.2  | 88.4 | 2.0  | NA |
| Spot 115 | 263  | 25079 | 2.0 | 20.3265 | 10.5  | 0.0953  | 10.6  | 0.0140 | 1.5 | 0.14 | 89.9  | 1.3  | 92.4  | 9.4   | 157.2  | 246.2  | 89.9 | 1.3  | NA |
| Spot 49  | 455  | 52897 | 3.5 | 22.1285 | 9.6   | 0.0883  | 9.7   | 0.0142 | 1.6 | 0.16 | 90.7  | 1.4  | 85.9  | 8.0   | -45.3  | 233.2  | 90.7 | 1.4  | NA |
| Spot 119 | 147  | 16258 | 0.6 | 18.8710 | 10.4  | 0.1181  | 12.7  | 0.0162 | 7.3 | 0.58 | 103.4 | 7.5  | 113.3 | 13.6  | 328.4  | 235.8  | 103  | 7.5  | NA |
| Spot 73  | 371  | 61081 | 2.1 | 21.0804 | 18.0  | 0.1124  | 18.0  | 0.0172 | 1.2 | 0.07 | 109.8 | 1.4  | 108.1 | 18.5  | 71.3   | 430.5  | 110  | 1.4  | NA |
| Spot 75  | 498  | 34231 | 0.7 | 20.4789 | 7.8   | 0.1485  | 9.0   | 0.0221 | 4.4 | 0.49 | 140.6 | 6.1  | 140.6 | 11.8  | 139.7  | 183.7  | 141  | 6.1  | NA |
| Spot 87  | 212  | 16507 | 2.6 | 21.4511 | 11.7  | 0.1425  | 12.7  | 0.0222 | 4.8 | 0.38 | 141.3 | 6.7  | 135.2 | 16.0  | 29.7   | 281.8  | 141  | 6.7  | NA |
| Spot 70  | 93   | 6793  | 1.0 | 17.3175 | 29.4  | 0.1955  | 31.0  | 0.0246 | 9.8 | 0.32 | 156.4 | 15.1 | 181.3 | 51.5  | 520.1  | 658.8  | 156  | 15.1 | NA |
| Spot 10  | 333  | 61452 | 1.6 | 21.0390 | 6.2   | 0.1638  | 6.2   | 0.0250 | 0.6 | 0.10 | 159.2 | 1.0  | 154.0 | 8.9   | 76.0   | 146.7  | 159  | 1.0  | NA |
| Spot 108 | 228  | 31700 | 1.2 | 20.3530 | 9.0   | 0.1700  | 9.0   | 0.0251 | 1.1 | 0.12 | 159.7 | 1.7  | 159.4 | 13.3  | 154.2  | 210.2  | 160  | 1.7  | NA |
| Spot 5   | 303  | 60404 | 0.6 | 20.6656 | 10.4  | 0.1677  | 10.5  | 0.0251 | 1.0 | 0.09 | 160.0 | 1.5  | 157.4 | 15.3  | 118.4  | 246.1  | 160  | 1.5  | NA |
| Spot 79  | 266  | 50832 | 0.7 | 20.4215 | 4.2   | 0.1697  | 4.3   | 0.0251 | 1.1 | 0.26 | 160.0 | 1.8  | 159.1 | 6.4   | 146.3  | 98.3   | 160  | 1.8  | NA |
| Spot 105 | 174  | 41150 | 1.6 | 19.4122 | 12.8  | 0.1788  | 12.9  | 0.0252 | 1.4 | 0.11 | 160.3 | 2.3  | 167.0 | 19.9  | 263.9  | 295.4  | 160  | 2.3  | NA |
| Spot 9   | 170  | 35854 | 0.7 | 20.7026 | 8.1   | 0.1679  | 8.3   | 0.0252 | 1.6 | 0.19 | 160.5 | 2.5  | 157.6 | 12.0  | 114.1  | 191.4  | 160  | 2.5  | NA |

|          |      |        |     |         |      |         |      |        |     |      |        |      |        |      |        |       |      |       |     |
|----------|------|--------|-----|---------|------|---------|------|--------|-----|------|--------|------|--------|------|--------|-------|------|-------|-----|
| Spot 69  | 233  | 37987  | 0.8 | 20.7779 | 11.2 | 0.1675  | 11.2 | 0.0252 | 0.8 | 0.07 | 160.7  | 1.2  | 157.2  | 16.3 | 105.5  | 264.9 | 161  | 1.2   | NA  |
| Spot 1   | 143  | 23716  | 1.0 | 21.1939 | 13.7 | 0.1643  | 13.7 | 0.0253 | 1.1 | 0.08 | 160.8  | 1.7  | 154.5  | 19.7 | 58.5   | 327.7 | 161  | 1.7   | NA  |
| Spot 28  | 360  | 57535  | 0.8 | 20.6434 | 3.5  | 0.1689  | 3.6  | 0.0253 | 0.7 | 0.19 | 161.0  | 1.1  | 158.5  | 5.2  | 120.9  | 82.5  | 161  | 1.1   | NA  |
| Spot 72  | 1426 | 394839 | 1.6 | 20.1305 | 1.1  | 0.1734  | 1.2  | 0.0253 | 0.4 | 0.35 | 161.2  | 0.6  | 162.4  | 1.7  | 179.8  | 25.1  | 161  | 0.6   | NA  |
| Spot 92  | 180  | 38590  | 0.8 | 19.3543 | 5.8  | 0.1804  | 6.1  | 0.0253 | 1.8 | 0.30 | 161.2  | 2.9  | 168.4  | 9.5  | 270.7  | 133.8 | 161  | 2.9   | NA  |
| Spot 44  | 480  | 36913  | 1.8 | 20.0803 | 6.6  | 0.1749  | 6.6  | 0.0255 | 0.6 | 0.10 | 162.1  | 1.0  | 163.6  | 10.0 | 185.6  | 152.8 | 162  | 1.0   | NA  |
| Spot 22  | 480  | 157483 | 1.1 | 19.9354 | 2.5  | 0.1772  | 2.8  | 0.0256 | 1.3 | 0.45 | 163.1  | 2.0  | 165.7  | 4.3  | 202.5  | 57.8  | 163  | 2.0   | NA  |
| Spot 113 | 120  | 16437  | 0.9 | 19.1572 | 13.8 | 0.1846  | 14.4 | 0.0257 | 4.1 | 0.29 | 163.3  | 6.7  | 172.0  | 22.8 | 294.2  | 316.3 | 163  | 6.7   | NA  |
| Spot 41  | 384  | 9263   | 0.9 | 18.8580 | 9.0  | 0.1877  | 9.1  | 0.0257 | 1.5 | 0.17 | 163.4  | 2.5  | 174.7  | 14.7 | 330.0  | 204.8 | 163  | 2.5   | NA  |
| Spot 65  | 258  | 34354  | 1.1 | 20.5192 | 7.6  | 0.1730  | 7.6  | 0.0258 | 1.0 | 0.13 | 163.9  | 1.6  | 162.1  | 11.4 | 135.1  | 177.9 | 164  | 1.6   | NA  |
| Spot 56  | 330  | 92270  | 1.0 | 20.0470 | 7.6  | 0.1772  | 7.7  | 0.0258 | 1.4 | 0.18 | 164.0  | 2.2  | 165.7  | 11.8 | 189.5  | 177.5 | 164  | 2.2   | NA  |
| Spot 46  | 361  | 35844  | 1.0 | 20.7183 | 4.8  | 0.1715  | 5.2  | 0.0258 | 1.9 | 0.37 | 164.0  | 3.1  | 160.7  | 7.7  | 112.4  | 114.3 | 164  | 3.1   | NA  |
| Spot 55  | 200  | 42090  | 1.4 | 20.9119 | 13.8 | 0.1700  | 13.8 | 0.0258 | 1.0 | 0.07 | 164.1  | 1.6  | 159.4  | 20.4 | 90.3   | 328.6 | 164  | 1.6   | NA  |
| Spot 82  | 278  | 43071  | 1.9 | 20.7941 | 11.1 | 0.1719  | 11.2 | 0.0259 | 1.1 | 0.10 | 165.0  | 1.9  | 161.1  | 16.7 | 103.8  | 263.5 | 165  | 1.9   | NA  |
| Spot 116 | 176  | 36729  | 0.9 | 18.7554 | 15.1 | 0.1906  | 15.2 | 0.0259 | 1.8 | 0.12 | 165.0  | 2.9  | 177.1  | 24.7 | 342.4  | 343.4 | 165  | 2.9   | NA  |
| Spot 53  | 343  | 50630  | 3.4 | 20.0303 | 3.2  | 0.1791  | 3.9  | 0.0260 | 2.2 | 0.57 | 165.6  | 3.6  | 167.3  | 5.9  | 191.5  | 73.7  | 166  | 3.6   | NA  |
| Spot 83  | 86   | 4826   | 1.1 | 18.3969 | 41.8 | 0.1952  | 42.0 | 0.0260 | 3.9 | 0.09 | 165.7  | 6.4  | 181.0  | 69.7 | 385.8  | 978.4 | 166  | 6.4   | NA  |
| Spot 71  | 64   | 14685  | 0.7 | 19.2445 | 28.8 | 0.1867  | 29.3 | 0.0261 | 5.1 | 0.17 | 165.8  | 8.3  | 173.8  | 46.8 | 283.8  | 671.7 | 166  | 8.3   | NA  |
| Spot 27  | 230  | 30370  | 1.2 | 21.1953 | 12.0 | 0.1702  | 12.0 | 0.0262 | 1.2 | 0.10 | 166.5  | 2.0  | 159.6  | 17.8 | 58.4   | 286.4 | 166  | 2.0   | NA  |
| Spot 64  | 142  | 3363   | 0.8 | 16.9451 | 19.9 | 0.2133  | 21.5 | 0.0262 | 8.1 | 0.38 | 166.8  | 13.3 | 196.3  | 38.4 | 567.6  | 438.2 | 167  | 13.3  | NA  |
| Spot 61  | 134  | 18563  | 0.7 | 20.6379 | 15.9 | 0.1764  | 16.2 | 0.0264 | 3.4 | 0.21 | 168.0  | 5.7  | 164.9  | 24.7 | 121.5  | 375.5 | 168  | 5.7   | NA  |
| Spot 117 | 288  | 9178   | 1.3 | 19.4891 | 10.5 | 0.1869  | 10.6 | 0.0264 | 0.5 | 0.05 | 168.1  | 0.8  | 174.0  | 16.9 | 254.8  | 242.9 | 168  | 0.8   | NA  |
| Spot 7   | 252  | 31074  | 0.7 | 19.7037 | 6.8  | 0.1864  | 6.9  | 0.0266 | 1.3 | 0.18 | 169.4  | 2.1  | 173.5  | 11.1 | 229.6  | 157.8 | 169  | 2.1   | NA  |
| Spot 2   | 91   | 13088  | 0.5 | 20.8338 | 17.9 | 0.1790  | 18.3 | 0.0270 | 3.7 | 0.20 | 172.0  | 6.3  | 167.2  | 28.1 | 99.2   | 425.7 | 172  | 6.3   | NA  |
| Spot 47  | 172  | 37146  | 1.3 | 19.3202 | 14.5 | 0.1931  | 14.6 | 0.0271 | 1.0 | 0.07 | 172.1  | 1.7  | 179.3  | 24.0 | 274.8  | 334.6 | 172  | 1.7   | NA  |
| Spot 48  | 151  | 46171  | 1.1 | 19.3655 | 8.4  | 0.1951  | 9.0  | 0.0274 | 3.3 | 0.37 | 174.3  | 5.7  | 181.0  | 14.9 | 269.4  | 192.2 | 174  | 5.7   | NA  |
| Spot 51  | 168  | 30201  | 1.4 | 21.4762 | 20.4 | 0.1774  | 20.5 | 0.0276 | 1.9 | 0.09 | 175.7  | 3.2  | 165.8  | 31.4 | 26.9   | 494.7 | 176  | 3.2   | NA  |
| Spot 77  | 204  | 46751  | 1.5 | 20.3871 | 16.6 | 0.1870  | 16.6 | 0.0277 | 0.5 | 0.03 | 175.9  | 0.9  | 174.1  | 26.6 | 150.3  | 391.7 | 176  | 0.9   | NA  |
| Spot 86  | 44   | 8734   | 2.0 | 17.4438 | 37.8 | 0.2189  | 38.2 | 0.0277 | 5.8 | 0.15 | 176.1  | 10.1 | 201.0  | 69.8 | 504.1  | 860.0 | 176  | 10.1  | NA  |
| Spot 84  | 188  | 56084  | 1.0 | 19.7630 | 9.2  | 0.1934  | 9.3  | 0.0277 | 1.2 | 0.13 | 176.2  | 2.1  | 179.5  | 15.3 | 222.6  | 213.2 | 176  | 2.1   | NA  |
| Spot 120 | 103  | 26571  | 1.3 | 21.5792 | 26.9 | 0.1784  | 26.9 | 0.0279 | 2.1 | 0.08 | 177.5  | 3.7  | 166.7  | 41.4 | 15.4   | 655.6 | 178  | 3.7   | NA  |
| Spot 37  | 179  | 95256  | 1.6 | 19.5892 | 11.2 | 0.1977  | 11.3 | 0.0281 | 1.1 | 0.10 | 178.6  | 1.9  | 183.2  | 18.9 | 243.0  | 259.8 | 179  | 1.9   | NA  |
| Spot 109 | 1396 | 12084  | 2.3 | 19.3932 | 1.6  | 0.2235  | 1.8  | 0.0314 | 0.9 | 0.49 | 199.6  | 1.7  | 204.8  | 3.3  | 266.1  | 35.6  | 200  | 1.7   | NA  |
| Spot 39  | 824  | 12654  | 1.7 | 18.9848 | 3.8  | 0.2356  | 5.1  | 0.0324 | 3.5 | 0.67 | 205.8  | 7.0  | 214.8  | 10.0 | 314.8  | 86.6  | 206  | 7.0   | NA  |
| Spot 63  | 873  | 145588 | 0.9 | 19.8899 | 2.4  | 0.2303  | 2.7  | 0.0332 | 1.2 | 0.44 | 210.7  | 2.4  | 210.4  | 5.1  | 207.8  | 56.3  | 211  | 2.4   | NA  |
| Spot 85  | 132  | 27253  | 1.5 | 19.4955 | 10.7 | 0.2362  | 10.8 | 0.0334 | 0.8 | 0.08 | 211.8  | 1.7  | 215.3  | 20.9 | 254.1  | 247.8 | 212  | 1.7   | NA  |
| Spot 106 | 812  | 264824 | 1.4 | 20.0003 | 2.3  | 0.2319  | 2.5  | 0.0336 | 0.9 | 0.35 | 213.3  | 1.8  | 211.8  | 4.7  | 195.0  | 54.1  | 213  | 1.8   | NA  |
| Spot 30  | 761  | 248344 | 2.1 | 19.8340 | 1.0  | 0.2346  | 1.2  | 0.0337 | 0.6 | 0.53 | 214.0  | 1.3  | 214.0  | 2.3  | 214.4  | 23.5  | 214  | 1.3   | NA  |
| Spot 42  | 1027 | 322964 | 2.1 | 19.7476 | 1.9  | 0.2363  | 2.7  | 0.0338 | 1.9 | 0.70 | 214.5  | 4.0  | 215.4  | 5.3  | 224.4  | 44.9  | 215  | 4.0   | NA  |
| Spot 23  | 532  | 48126  | 2.2 | 20.0551 | 3.2  | 0.2350  | 3.3  | 0.0342 | 0.8 | 0.24 | 216.7  | 1.7  | 214.3  | 6.4  | 188.6  | 75.4  | 217  | 1.7   | NA  |
| Spot 45  | 542  | 27117  | 2.3 | 19.0393 | 5.5  | 0.2484  | 5.9  | 0.0343 | 1.9 | 0.33 | 217.4  | 4.1  | 225.2  | 11.8 | 308.2  | 126.1 | 217  | 4.1   | NA  |
| Spot 58  | 601  | 27028  | 2.2 | 19.2026 | 3.1  | 0.2477  | 3.2  | 0.0345 | 0.8 | 0.26 | 218.6  | 1.8  | 224.7  | 6.5  | 288.8  | 71.5  | 219  | 1.8   | NA  |
| Spot 16  | 1058 | 266369 | 2.0 | 19.6208 | 1.0  | 0.2469  | 1.2  | 0.0351 | 0.6 | 0.53 | 222.6  | 1.4  | 224.1  | 2.4  | 239.3  | 23.0  | 223  | 1.4   | NA  |
| Spot 21  | 595  | 43084  | 1.7 | 19.5770 | 2.7  | 0.2483  | 8.5  | 0.0353 | 8.0 | 0.95 | 223.4  | 17.7 | 225.2  | 17.1 | 244.5  | 61.1  | 223  | 17.7  | NA  |
| Spot 118 | 404  | 170169 | 5.5 | 19.9588 | 4.2  | 0.2467  | 4.6  | 0.0357 | 2.0 | 0.42 | 226.2  | 4.4  | 223.9  | 9.3  | 199.8  | 97.0  | 226  | 4.4   | NA  |
| Spot 4   | 181  | 2441   | 1.9 | 17.1631 | 9.8  | 0.2878  | 10.0 | 0.0358 | 2.2 | 0.22 | 226.9  | 5.0  | 256.8  | 22.7 | 539.7  | 213.8 | 227  | 5.0   | NA  |
| Spot 57  | 124  | 36083  | 2.4 | 13.4468 | 4.0  | 0.9149  | 7.3  | 0.0892 | 6.1 | 0.83 | 550.9  | 32.1 | 659.6  | 35.3 | 1051.5 | 81.0  | 551  | 32.1  | 52  |
| Spot 35  | 189  | 141601 | 2.2 | 13.7120 | 1.1  | 1.7345  | 1.1  | 0.1725 | 0.3 | 0.27 | 1025.8 | 2.9  | 1021.4 | 7.3  | 1012.0 | 22.1  | 1012 | 22.1  | 101 |
| Spot 91  | 62   | 115144 | 2.0 | 13.3835 | 3.0  | 1.8821  | 3.3  | 0.1827 | 1.2 | 0.36 | 1081.7 | 11.5 | 1074.8 | 21.6 | 1061.0 | 61.4  | 1061 | 61.4  | 102 |
| Spot 102 | 105  | 201576 | 1.4 | 13.3561 | 2.6  | 1.8772  | 2.7  | 0.1818 | 0.7 | 0.25 | 1077.0 | 6.6  | 1073.1 | 17.8 | 1065.1 | 52.4  | 1065 | 52.4  | 101 |
| Spot 26  | 65   | 59951  | 1.5 | 13.2658 | 2.5  | 1.9200  | 2.6  | 0.1847 | 0.9 | 0.34 | 1092.8 | 9.0  | 1088.1 | 17.7 | 1078.7 | 50.0  | 1079 | 50.0  | 101 |
| Spot 11  | 48   | 65300  | 1.4 | 13.1662 | 2.8  | 1.8834  | 2.9  | 0.1798 | 0.8 | 0.27 | 1066.1 | 7.5  | 1075.3 | 18.9 | 1093.8 | 55.1  | 1094 | 55.1  | 97  |
| Spot 50  | 90   | 212726 | 1.9 | 13.1560 | 2.2  | 1.9299  | 2.2  | 0.1841 | 0.4 | 0.16 | 1089.6 | 3.7  | 1091.5 | 14.8 | 1095.4 | 43.8  | 1095 | 43.8  | 99  |
| Spot 3   | 80   | 116637 | 1.0 | 13.1127 | 1.9  | 1.9767  | 1.9  | 0.1880 | 0.4 | 0.23 | 1110.5 | 4.4  | 1107.6 | 12.9 | 1102.0 | 37.1  | 1102 | 37.1  | 101 |
| Spot 67  | 110  | 18770  | 1.9 | 13.0478 | 3.1  | 1.9350  | 8.1  | 0.1831 | 7.4 | 0.92 | 1084.0 | 74.3 | 1093.3 | 54.1 | 1111.9 | 62.7  | 1112 | 62.7  | 97  |
| Spot 101 | 116  | 197431 | 2.4 | 12.7194 | 1.9  | 2.1659  | 2.0  | 0.1998 | 0.7 | 0.36 | 1174.3 | 7.8  | 1170.2 | 14.1 | 1162.6 | 37.6  | 1163 | 37.6  | 101 |
| Spot 112 | 35   | 61132  | 2.4 | 12.7135 | 8.4  | 1.9909  | 8.5  | 0.1836 | 1.6 | 0.19 | 1086.5 | 15.8 | 1112.4 | 57.7 | 1163.5 | 166.4 | 1163 | 166.4 | 93  |
| Spot 32  | 179  | 61052  | 1.2 | 11.0697 | 1.1  | 2.7860  | 4.6  | 0.2237 | 4.5 | 0.97 | 1301.3 | 52.8 | 1351.8 | 34.5 | 1432.6 | 21.1  | 1433 | 21.1  | 91  |
| Spot 59  | 185  | 101066 | 1.2 | 8.8943  | 1.0  | 4.0473  | 1.4  | 0.2904 | 1.0 | 0.71 | 1643.7 | 14.4 | 1643.8 | 11.4 | 1643.8 | 18.3  | 1644 | 18.3  | 100 |
| Spot 17  | 158  | 552128 | 1.4 | 8.8405  | 0.5  | 4.4404  | 4.5  | 0.2847 | 4.5 | 0.99 | 1615.0 | 63.8 | 1719.9 | 37.3 | 1850.1 | 9.5   | 1850 | 9.5   | 87  |
| Spot 43  | 72   | 204235 | 1.2 | 8.5263  | 0.9  | 5.6453  | 1.1  | 0.3491 | 0.6 | 0.54 | 1930.3 | 9.5  | 1923.0 | 9.1  | 1915.2 | 15.9  | 1915 | 15.9  | 101 |
| Spot 114 | 429  | 129724 | 1.1 | 6.0675  | 0.2  | 9.9972  | 2.6  | 0.4399 | 2.6 | 1.00 | 2350.3 | 51.3 | 2434.5 | 24.1 | 2505.6 | 2.7   | 2506 | 2.7   | 94  |
| Spot 31  | 62   | 349247 | 0.7 | 5.3615  | 0.5  | 13.6576 | 0.8  | 0.5311 | 0.7 | 0.81 | 2746.0 | 15.4 | 2726.3 | 8.0  | 2711.7 | 8.2   | 2712 | 8.2   | 101 |

## ELM15MC-16

|         |     |       |     |         |      |        |      |        |     |      |       |     |       |      |        |       |      |     |    |
|---------|-----|-------|-----|---------|------|--------|------|--------|-----|------|-------|-----|-------|------|--------|-------|------|-----|----|
| Spot 91 | 436 | 13568 | 1.0 | 20.6608 | 5.4  | 0.0866 | 5.7  | 0.0130 | 1.7 | 0.30 | 83.1  | 1.4 | 84.3  | 4.6  | 118.9  | 128.5 | 83.1 | 1.4 | NA |
| Spot 15 | 291 | 10773 | 1.1 | 21.5972 | 3.8  | 0.0829 | 4.3  | 0.0130 | 1.9 | 0.44 | 83.2  | 1.5 | 80.9  | 3.3  | 13.4   | 92.5  | 83.2 | 1.5 | NA |
| Spot 62 | 755 | 38280 | 1.1 | 21.4832 | 2.7  | 0.0838 | 3.2  | 0.0130 | 1.6 | 0.49 | 83.6  | 1.3 | 81.7  | 2.5  | 26.1   | 65.8  | 83.6 | 1.3 | NA |
| Spot 94 | 295 | 19802 | 1.8 | 21.0799 | 12.8 | 0.0876 | 12.9 | 0.0134 | 1.3 | 0.10 | 85.7  | 1.1 | 85.2  | 10.5 | 71.3   | 306.0 | 85.7 | 1.1 | NA |
| Spot 53 | 324 | 23919 | 1.5 | 21.2408 | 5.3  | 0.0881 | 5.5  | 0.0136 | 1.3 | 0.23 | 86.9  | 1.1 | 85.8  | 4.5  | 53.2   | 126.8 | 86.9 | 1.1 | NA |
| Spot 97 | 186 | 1905  | 1.7 | 17.8015 | 13.5 | 0.1058 | 14.0 | 0.0137 | 3.7 | 0.26 | 87.5  | 3.2 | 102.1 | 13.6 | 459.3  | 301.6 | 87.5 | 3.2 | NA |
| Spot 29 | 93  | 3125  | 0.7 | 26.0195 | 23.2 | 0.0737 | 23.5 | 0.0139 | 3.9 | 0.17 | 89.0  | 3.4 | 72.2  | 16.4 | -455.3 | 617.6 | 89.0 | 3.4 | NA |
| Spot 11 | 254 | 12676 | 2.0 | 20.3997 | 5.5  | 0.1013 | 6.2  | 0.0150 | 3.0 | 0.48 | 95.9  | 2.8 | 97.9  | 5.8  | 148.8  | 128.5 | 95.9 | 2.8 | NA |
| Spot 40 | 332 | 6138  | 1.6 | 20.5255 | 6.1  | 0.1026 | 6.4  | 0.0153 | 2.0 | 0.31 | 97.8  | 2.0 | 99.2  | 6.0  | 134.4  | 142.6 | 97.8 | 2.0 | NA |
| Spot 65 | 711 | 54500 | 1.4 | 20.9775 | 2.8  | 0.1039 | 2.9  | 0.0158 | 0.5 | 0.18 | 101.1 | 0.5 | 100.4 | 2.8  | 82.9   | 67.6  | 101  | 0.5 | NA |
| Spot 14 | 591 | 53801 | 1.5 | 21.3391 | 1.6  | 0.1032 | 1.8  | 0.0160 | 0.9 | 0.49 | 102.2 | 0.9 | 99.8  | 1.7  | 42.2   | 37.7  | 102  | 0.9 | NA |
| Spot 80 | 784 | 51551 | 2.0 | 20.5690 | 1.9  | 0.1200 | 2.1  | 0.0179 | 0.7 | 0.35 | 114.4 | 0.8 | 115.1 | 2.2  | 129.4  | 45.3  | 114  | 0.8 | NA |
| Spot 21 | 845 | 72947 | 1.6 | 20.7286 | 2.6  | 0.1201 | 4.0  | 0.0181 | 3.0 | 0.74 | 115.3 | 3.4 | 115.2 | 4.3  | 111.2  | 62.5  | 115  | 3.4 | NA |
| Spot 20 | 412 | 44385 | 1.7 | 20.3657 | 2.2  | 0.1376 | 6.1  | 0.0203 | 5.7 | 0.93 | 129.7 | 7.3 | 130.9 | 7.5  | 152.7  | 51.6  | 130  | 7.3 | NA |
| Spot 85 | 260 | 36492 | 1.7 | 20.1736 | 5.4  | 0.1610 | 5.4  | 0.0236 | 0.8 | 0.15 | 150.1 | 1.2 | 151.6 | 7.6  | 174.8  | 125.1 | 150  | 1.2 | NA |
| Spot 41 | 384 | 33472 | 1.0 | 20.1658 | 3.5  | 0.1659 | 3.7  | 0.0243 | 1.1 | 0.31 | 154.5 | 1.8 | 155.8 | 5.3  | 175.7  | 81.0  | 155  | 1.8 | NA |
| Spot 90 | 204 | 3673  | 1.1 | 18.8524 | 9.8  | 0.1836 | 9.9  | 0.0251 | 1.6 | 0.16 | 159.8 | 2.5 | 171.1 | 15.6 | 330.7  | 222.3 | 160  | 2.5 | NA |
| Spot 76 | 124 | 15256 | 0.8 | 20.5964 | 6.2  | 0.1683 | 6.4  | 0.0251 | 1.6 | 0.25 | 160.0 | 2.5 | 157.9 | 9.3  | 126.3  | 145.5 | 160  | 2.5 | NA |
| Spot 82 | 82  | 10878 | 0.8 | 21.6361 | 13.3 | 0.1611 | 13.6 | 0.0253 | 2.6 | 0.19 | 160.9 | 4.1 | 151.6 | 19.1 | 9.1    | 322.3 | 161  | 4.1 | NA |
| Spot 10 | 622 | 46322 | 0.4 | 20.2031 | 1.5  | 0.1727 | 2.1  | 0.0253 | 1.4 | 0.69 | 161.1 | 2.3 | 161.8 | 3.1  | 171.4  | 34.6  | 161  | 2.3 | NA |
| Spot 34 | 478 | 83515 | 1.6 | 20.0663 | 2.1  | 0.1745 | 2.8  | 0.0254 | 1.8 | 0.66 | 161.7 | 2.9 | 163.3 | 4.2  | 187.3  | 48.9  | 162  | 2.9 | NA |
| Spot 60 | 590 | 78303 | 1.0 | 19.8389 | 1.8  | 0.1765 | 1.9  | 0.0254 | 0.6 | 0.30 | 161.7 | 0.9 | 165.0 | 2.8  | 213.8  | 41.1  | 162  | 0.9 | NA |
| Spot 63 | 389 | 29146 | 3.8 | 20.5776 | 2.9  | 0.1707 | 3.0  | 0.0255 | 0.8 | 0.25 | 162.1 | 1.2 | 160.0 | 4.5  | 128.4  | 69.4  | 162  | 1.2 | NA |
| Spot 98 | 102 | 6099  | 0.7 | 19.4494 | 28.2 | 0.1812 | 28.3 | 0.0256 | 1.9 | 0.07 | 162.7 | 3.0 | 169.1 | 44.1 | 259.5  | 660.0 | 163  | 3.0 | NA |
| Spot 36 | 297 | 38605 | 1.4 | 20.5126 | 2.5  | 0.1720 | 2.7  | 0.0256 | 1.1 | 0.39 | 162.9 | 1.7 | 161.2 | 4.0  | 135.8  | 58.2  | 163  | 1.7 | NA |
| Spot 4  | 780 | 53329 | 1.8 | 20.3641 | 1.2  | 0.1734 | 1.3  | 0.0256 | 0.4 | 0.31 | 163.0 | 0.6 | 162.3 | 2.0  | 152.9  | 29.1  | 163  | 0.6 | NA |
| Spot 81 | 199 | 19201 | 1.2 | 20.9493 | 4.4  | 0.1694 | 4.6  | 0.0257 | 1.1 | 0.24 | 163.8 | 1.8 | 158.9 | 6.7  | 86.1   | 105.4 | 164  | 1.8 | NA |
| Spot 68 | 116 | 13358 | 1.2 | 21.5158 | 7.0  | 0.1651 | 7.3  | 0.0258 | 1.8 | 0.25 | 164.0 | 3.0 | 155.2 | 10.5 | 22.4   | 169.3 | 164  | 3.0 | NA |
| Spot 24 | 302 | 27080 | 1.3 | 20.5147 | 5.1  | 0.1739 | 5.2  | 0.0259 | 0.9 | 0.16 | 164.7 | 1.4 | 162.8 | 7.8  | 135.6  | 120.2 | 165  | 1.4 | NA |
| Spot 22 | 326 | 26526 | 1.5 | 20.4274 | 2.6  | 0.1751 | 2.8  | 0.0259 | 1.1 | 0.37 | 165.1 | 1.7 | 163.9 | 4.3  | 145.6  | 61.7  | 165  | 1.7 | NA |

|          |      |        |     |         |      |        |      |        |     |      |        |      |        |      |        |       |      |      |     |
|----------|------|--------|-----|---------|------|--------|------|--------|-----|------|--------|------|--------|------|--------|-------|------|------|-----|
| Spot 92  | 118  | 13884  | 1.3 | 21.4233 | 12.5 | 0.1675 | 12.7 | 0.0260 | 2.0 | 0.16 | 165.6  | 3.2  | 157.2  | 18.5 | 32.8   | 301.4 | 166  | 3.2  | NA  |
| Spot 70  | 350  | 31928  | 1.2 | 20.5932 | 2.3  | 0.1743 | 2.6  | 0.0260 | 1.3 | 0.50 | 165.7  | 2.1  | 163.1  | 3.9  | 126.7  | 53.2  | 166  | 2.1  | NA  |
| Spot 74  | 531  | 50131  | 1.4 | 20.4487 | 1.7  | 0.1756 | 1.9  | 0.0260 | 0.9 | 0.49 | 165.7  | 1.5  | 164.3  | 2.9  | 143.2  | 39.7  | 166  | 1.5  | NA  |
| Spot 103 | 593  | 37217  | 1.4 | 20.2194 | 10.0 | 0.1783 | 10.0 | 0.0262 | 0.7 | 0.07 | 166.4  | 1.2  | 166.6  | 15.4 | 169.5  | 233.2 | 166  | 1.2  | NA  |
| Spot 49  | 365  | 96920  | 1.7 | 20.3288 | 2.7  | 0.1775 | 2.8  | 0.0262 | 0.7 | 0.25 | 166.5  | 1.2  | 165.9  | 4.2  | 156.9  | 62.3  | 167  | 1.2  | NA  |
| Spot 42  | 607  | 153405 | 1.0 | 20.2327 | 1.5  | 0.1791 | 4.6  | 0.0263 | 4.4 | 0.94 | 167.3  | 7.2  | 167.3  | 7.1  | 168.0  | 35.2  | 167  | 7.2  | NA  |
| Spot 107 | 415  | 30491  | 0.5 | 20.3531 | 7.6  | 0.1786 | 7.7  | 0.0264 | 1.3 | 0.17 | 167.7  | 2.2  | 166.8  | 11.9 | 154.1  | 178.5 | 168  | 2.2  | NA  |
| Spot 55  | 211  | 32935  | 0.7 | 20.2726 | 5.8  | 0.1794 | 6.1  | 0.0264 | 2.1 | 0.34 | 167.9  | 3.5  | 167.6  | 9.5  | 163.4  | 134.9 | 168  | 3.5  | NA  |
| Spot 57  | 159  | 6966   | 0.8 | 20.4104 | 5.8  | 0.1794 | 6.1  | 0.0266 | 2.0 | 0.32 | 169.0  | 3.3  | 167.6  | 9.5  | 147.6  | 136.5 | 169  | 3.3  | NA  |
| Spot 78  | 356  | 49877  | 1.3 | 20.0620 | 2.5  | 0.1827 | 2.9  | 0.0266 | 1.5 | 0.51 | 169.1  | 2.5  | 170.4  | 4.6  | 187.8  | 58.4  | 169  | 2.5  | NA  |
| Spot 93  | 184  | 24995  | 1.1 | 21.5108 | 7.1  | 0.1715 | 7.3  | 0.0268 | 1.9 | 0.26 | 170.2  | 3.2  | 160.7  | 10.9 | 23.0   | 169.6 | 170  | 3.2  | NA  |
| Spot 28  | 285  | 58817  | 1.5 | 20.1294 | 2.0  | 0.1843 | 3.2  | 0.0269 | 2.4 | 0.76 | 171.2  | 4.1  | 171.8  | 5.0  | 180.0  | 47.8  | 171  | 4.1  | NA  |
| Spot 35  | 220  | 24184  | 1.0 | 19.5426 | 5.8  | 0.1908 | 5.9  | 0.0270 | 0.9 | 0.15 | 172.0  | 1.5  | 177.3  | 9.5  | 248.5  | 133.6 | 172  | 1.5  | NA  |
| Spot 73  | 239  | 27139  | 0.6 | 21.2099 | 4.3  | 0.1761 | 4.6  | 0.0271 | 1.6 | 0.36 | 172.3  | 2.8  | 164.7  | 7.0  | 56.7   | 103.0 | 172  | 2.8  | NA  |
| Spot 19  | 1201 | 61823  | 0.7 | 20.0814 | 0.7  | 0.1875 | 1.3  | 0.0273 | 1.1 | 0.84 | 173.7  | 1.9  | 174.5  | 2.1  | 185.5  | 16.1  | 174  | 1.9  | NA  |
| Spot 108 | 207  | 23782  | 1.0 | 21.1167 | 12.8 | 0.1810 | 12.8 | 0.0277 | 1.0 | 0.08 | 176.2  | 1.7  | 168.9  | 20.0 | 67.2   | 305.7 | 176  | 1.7  | NA  |
| Spot 26  | 67   | 7920   | 1.2 | 20.6411 | 7.7  | 0.1864 | 8.1  | 0.0279 | 2.4 | 0.30 | 177.4  | 4.3  | 173.6  | 13.0 | 121.1  | 182.8 | 177  | 4.3  | NA  |
| Spot 33  | 214  | 30342  | 1.4 | 19.6682 | 3.1  | 0.1973 | 3.6  | 0.0281 | 1.7 | 0.48 | 178.9  | 3.1  | 182.9  | 6.0  | 233.8  | 72.6  | 179  | 3.1  | NA  |
| Spot 8   | 211  | 2219   | 1.1 | 19.1177 | 7.9  | 0.2037 | 8.1  | 0.0282 | 1.7 | 0.21 | 179.5  | 3.0  | 188.2  | 13.9 | 298.9  | 181.2 | 180  | 3.0  | NA  |
| Spot 54  | 59   | 5475   | 1.0 | 20.5529 | 14.9 | 0.1966 | 15.3 | 0.0293 | 3.3 | 0.21 | 186.2  | 6.0  | 182.2  | 25.5 | 131.2  | 352.9 | 186  | 6.0  | NA  |
| Spot 5   | 815  | 94506  | 1.3 | 19.8261 | 0.7  | 0.2294 | 1.0  | 0.0330 | 0.6 | 0.65 | 209.2  | 1.3  | 209.7  | 1.9  | 215.3  | 17.3  | 209  | 1.3  | NA  |
| Spot 48  | 954  | 11457  | 1.9 | 19.6954 | 1.4  | 0.2354 | 1.8  | 0.0336 | 1.2 | 0.64 | 213.2  | 2.5  | 214.6  | 3.5  | 230.5  | 32.3  | 213  | 2.5  | NA  |
| Spot 47  | 632  | 78537  | 2.2 | 19.7863 | 1.3  | 0.2360 | 1.8  | 0.0339 | 1.3 | 0.72 | 214.7  | 2.8  | 215.2  | 3.5  | 219.9  | 29.3  | 215  | 2.8  | NA  |
| Spot 100 | 441  | 99023  | 1.9 | 19.0326 | 6.0  | 0.2459 | 6.0  | 0.0339 | 0.8 | 0.14 | 215.2  | 1.7  | 223.2  | 12.1 | 309.1  | 136.6 | 215  | 1.7  | NA  |
| Spot 38  | 1200 | 158995 | 1.6 | 19.7546 | 0.6  | 0.2374 | 0.7  | 0.0340 | 0.5 | 0.63 | 215.6  | 1.0  | 216.3  | 1.4  | 223.6  | 13.1  | 216  | 1.0  | NA  |
| Spot 43  | 346  | 37098  | 2.5 | 19.8851 | 2.6  | 0.2385 | 2.8  | 0.0344 | 0.9 | 0.34 | 218.0  | 2.0  | 217.2  | 5.4  | 208.4  | 60.7  | 218  | 2.0  | NA  |
| Spot 87  | 1235 | 75534  | 1.9 | 19.1109 | 3.3  | 0.2482 | 9.0  | 0.0344 | 8.4 | 0.93 | 218.1  | 18.0 | 225.1  | 18.2 | 299.7  | 74.5  | 218  | 18.0 | NA  |
| Spot 64  | 368  | 140607 | 2.7 | 19.7050 | 2.1  | 0.2440 | 2.2  | 0.0349 | 0.8 | 0.37 | 220.9  | 1.8  | 221.7  | 4.5  | 229.4  | 48.2  | 221  | 1.8  | NA  |
| Spot 39  | 432  | 73991  | 1.6 | 19.7511 | 1.5  | 0.2442 | 2.3  | 0.0350 | 1.7 | 0.73 | 221.6  | 3.6  | 221.9  | 4.5  | 224.0  | 35.7  | 222  | 3.6  | NA  |
| Spot 30  | 885  | 15827  | 2.9 | 19.4606 | 1.9  | 0.2496 | 3.0  | 0.0352 | 2.3 | 0.77 | 223.2  | 5.0  | 226.2  | 6.0  | 258.2  | 43.8  | 223  | 5.0  | NA  |
| Spot 27  | 864  | 363929 | 2.3 | 19.6135 | 0.5  | 0.2521 | 0.6  | 0.0359 | 0.4 | 0.67 | 227.1  | 0.9  | 228.2  | 1.3  | 240.2  | 10.9  | 227  | 0.9  | NA  |
| Spot 104 | 534  | 68295  | 2.2 | 19.9342 | 5.2  | 0.2501 | 5.2  | 0.0362 | 0.7 | 0.13 | 229.0  | 1.6  | 226.7  | 10.6 | 202.7  | 120.0 | 229  | 1.6  | NA  |
| Spot 59  | 743  | 78356  | 2.1 | 19.7852 | 1.3  | 0.2580 | 1.5  | 0.0370 | 0.8 | 0.51 | 234.4  | 1.8  | 233.1  | 3.1  | 220.0  | 29.8  | 234  | 1.8  | NA  |
| Spot 46  | 245  | 77144  | 1.5 | 18.8381 | 1.3  | 0.2940 | 5.1  | 0.0402 | 4.9 | 0.97 | 253.9  | 12.3 | 261.7  | 11.8 | 332.4  | 29.3  | 254  | 12.3 | NA  |
| Spot 51  | 420  | 50485  | 2.0 | 19.4846 | 1.3  | 0.2917 | 2.7  | 0.0412 | 2.4 | 0.88 | 260.4  | 6.1  | 259.9  | 6.2  | 255.3  | 29.8  | 260  | 6.1  | NA  |
| Spot 7   | 149  | 47445  | 1.5 | 18.7377 | 1.5  | 0.4555 | 2.6  | 0.0619 | 2.1 | 0.80 | 387.2  | 7.7  | 381.1  | 8.2  | 344.5  | 34.8  | 387  | 7.7  | NA  |
| Spot 71  | 97   | 32219  | 1.1 | 18.1300 | 4.5  | 0.4914 | 4.7  | 0.0646 | 1.1 | 0.24 | 403.6  | 4.4  | 405.9  | 15.6 | 418.6  | 101.3 | 404  | 4.4  | 96  |
| Spot 6   | 36   | 17293  | 0.8 | 13.8399 | 3.1  | 1.6733 | 3.3  | 0.1680 | 1.3 | 0.40 | 1000.9 | 12.4 | 998.4  | 21.2 | 993.1  | 62.1  | 993  | 62.1 | 101 |
| Spot 67  | 46   | 19218  | 1.3 | 13.7909 | 2.3  | 1.6010 | 2.3  | 0.1601 | 0.6 | 0.24 | 957.5  | 5.0  | 970.6  | 14.6 | 1000.3 | 46.1  | 1000 | 46.1 | 96  |
| Spot 58  | 643  | 734145 | 0.9 | 13.7349 | 0.2  | 1.6934 | 0.4  | 0.1687 | 0.3 | 0.86 | 1004.9 | 2.9  | 1006.1 | 2.3  | 1008.6 | 3.8   | 1009 | 3.8  | 100 |
| Spot 13  | 53   | 42893  | 1.2 | 13.6092 | 2.5  | 1.7228 | 2.7  | 0.1700 | 1.0 | 0.36 | 1012.3 | 9.1  | 1017.1 | 17.1 | 1027.2 | 50.1  | 1027 | 50.1 | 99  |
| Spot 12  | 79   | 30679  | 1.0 | 13.3888 | 1.1  | 1.8387 | 1.8  | 0.1785 | 1.4 | 0.78 | 1059.0 | 14.0 | 1059.4 | 12.1 | 1060.2 | 23.1  | 1060 | 23.1 | 100 |
| Spot 2   | 115  | 78379  | 1.3 | 13.1977 | 0.7  | 1.8661 | 0.8  | 0.1786 | 0.5 | 0.57 | 1059.4 | 4.6  | 1069.1 | 5.4  | 1089.0 | 13.5  | 1089 | 13.5 | 97  |
| Spot 23  | 33   | 21540  | 1.7 | 13.1952 | 2.9  | 1.9895 | 3.1  | 0.1904 | 0.8 | 0.27 | 1123.5 | 8.6  | 1111.9 | 20.6 | 1089.4 | 58.9  | 1089 | 58.9 | 103 |
| Spot 84  | 61   | 54774  | 1.9 | 12.9418 | 1.0  | 2.0532 | 1.1  | 0.1927 | 0.5 | 0.40 | 1136.1 | 4.8  | 1133.4 | 7.8  | 1128.2 | 20.9  | 1128 | 20.9 | 101 |
| Spot 89  | 374  | 643087 | 1.9 | 12.9382 | 0.4  | 2.0440 | 0.9  | 0.1918 | 0.8 | 0.91 | 1131.1 | 8.4  | 1130.3 | 6.1  | 1128.7 | 7.4   | 1129 | 7.4  | 100 |
| Spot 52  | 81   | 83097  | 2.0 | 12.9268 | 1.3  | 2.0576 | 1.4  | 0.1929 | 0.6 | 0.46 | 1137.1 | 6.8  | 1134.8 | 9.7  | 1130.5 | 25.2  | 1130 | 25.2 | 101 |
| Spot 9   | 89   | 49811  | 2.0 | 12.8027 | 1.6  | 2.1232 | 1.8  | 0.1972 | 0.9 | 0.50 | 1160.0 | 9.8  | 1156.4 | 12.7 | 1149.6 | 31.6  | 1150 | 31.6 | 101 |
| Spot 110 | 286  | 420655 | 1.2 | 12.2332 | 0.9  | 2.4497 | 2.4  | 0.2173 | 2.3 | 0.93 | 1267.8 | 26.3 | 1257.3 | 17.7 | 1239.4 | 17.3  | 1239 | 17.3 | 102 |
| Spot 86  | 61   | 58890  | 1.6 | 11.1569 | 1.1  | 3.0917 | 1.2  | 0.2502 | 0.5 | 0.39 | 1439.3 | 6.1  | 1430.6 | 9.3  | 1417.7 | 21.5  | 1418 | 21.5 | 102 |
| Spot 83  | 63   | 54620  | 1.5 | 11.0477 | 1.1  | 3.1602 | 1.3  | 0.2532 | 0.7 | 0.56 | 1455.0 | 9.5  | 1447.5 | 10.2 | 1436.4 | 20.9  | 1436 | 20.9 | 101 |
| Spot 96  | 38   | 24007  | 1.4 | 11.0399 | 4.7  | 3.0356 | 4.8  | 0.2431 | 1.2 | 0.24 | 1402.6 | 14.5 | 1416.6 | 36.9 | 1437.8 | 89.5  | 1438 | 89.5 | 98  |
| Spot 31  | 106  | 35121  | 2.6 | 10.9524 | 0.9  | 3.1225 | 1.0  | 0.2480 | 0.5 | 0.51 | 1428.3 | 6.8  | 1438.2 | 7.9  | 1452.9 | 16.8  | 1453 | 16.8 | 98  |
| Spot 56  | 129  | 361931 | 1.3 | 10.4999 | 0.5  | 3.5192 | 0.7  | 0.2680 | 0.5 | 0.71 | 1530.6 | 6.6  | 1531.5 | 5.4  | 1532.8 | 9.0   | 1533 | 9.0  | 100 |
| Spot 111 | 66   | 59225  | 0.3 | 9.9990  | 2.3  | 3.9190 | 2.9  | 0.2842 | 1.9 | 0.63 | 1612.5 | 26.4 | 1617.6 | 23.9 | 1624.3 | 42.7  | 1624 | 42.7 | 99  |
| Spot 3   | 101  | 20756  | 2.0 | 9.8762  | 0.7  | 4.0171 | 1.0  | 0.2877 | 0.7 | 0.70 | 1630.2 | 9.8  | 1637.7 | 7.9  | 1647.2 | 12.9  | 1647 | 12.9 | 99  |
| Spot 101 | 160  | 276842 | 2.7 | 9.5225  | 1.0  | 4.5144 | 1.1  | 0.3118 | 0.6 | 0.50 | 1749.4 | 8.5  | 1733.6 | 9.3  | 1714.6 | 17.8  | 1715 | 17.8 | 102 |
| Spot 18  | 146  | 115525 | 2.1 | 9.4916  | 0.3  | 4.4536 | 1.6  | 0.3066 | 1.6 | 0.98 | 1723.9 | 23.6 | 1722.4 | 13.2 | 1720.5 | 5.2   | 1721 | 5.2  | 100 |
| Spot 37  | 242  | 352807 | 1.3 | 9.3487  | 0.3  | 4.6067 | 0.7  | 0.3123 | 0.7 | 0.93 | 1752.2 | 10.2 | 1750.5 | 6.0  | 1748.3 | 4.9   | 1748 | 4.9  | 100 |
| Spot 109 | 88   | 207371 | 1.9 | 9.2066  | 1.1  | 4.8295 | 1.4  | 0.3225 | 0.8 | 0.61 | 1801.8 | 13.1 | 1790.1 | 11.6 | 1776.4 | 20.0  | 1776 | 20.0 | 101 |
| Spot 45  | 213  | 138476 | 1.8 | 9.1732  | 0.2  | 4.7548 | 1.2  | 0.3163 | 1.2 | 0.99 | 1771.8 | 19.1 | 1777.0 | 10.4 | 1783.0 | 3.4   | 1783 | 3.4  | 99  |
| Spot 50  | 277  | 153783 | 0.9 | 9.1717  | 0.2  | 4.8251 | 2.2  | 0.3210 | 2.2 | 1.00 | 1794.4 | 34.8 | 1789.3 | 18.7 | 1783.3 | 2.8   | 1783 | 2.8  | 101 |
| Spot 44  | 190  | 263171 | 2.9 | 9.1383  | 0.2  | 4.8984 | 0.4  | 0.3246 | 0.3 | 0.85 | 1812.4 | 5.4  | 1802.0 | 3.4  | 1789.9 | 3.8   | 1790 | 3.8  | 101 |
| Spot 69  | 284  | 464155 | 4.6 | 8.9536  | 0.4  | 4.8217 | 1.5  | 0.3131 | 1.4 | 0.97 | 1756.0 | 22.0 | 1788.7 | 12.5 | 1827.0 | 7.0   | 1827 | 7.0  | 96  |
| Spot 79  | 102  | 144732 | 0.8 | 8.9269  | 0.5  | 5.0569 | 0.8  | 0.3274 | 0.6 | 0.77 | 1825.8 | 10.0 | 1828.9 | 6.9  | 1832.4 | 9.3   | 1832 | 9.3  | 100 |
| Spot 17  | 48   | 48914  | 1.4 | 8.1521  | 0.8  | 6.0458 | 1.1  | 0.3575 | 0.8 | 0.72 | 1970   |      |        |      |        |       |      |      |     |

|          |      |       |     |         |     |        |      |        |     |      |       |     |       |      |        |       |     |     |    |
|----------|------|-------|-----|---------|-----|--------|------|--------|-----|------|-------|-----|-------|------|--------|-------|-----|-----|----|
| Spot 24  | 640  | 8334  | 2.0 | 17.7554 | 2.0 | 0.1907 | 2.7  | 0.0254 | 0.7 | 0.25 | 161.7 | 1.0 | 177.2 | 4.3  | 389.5  | 58.1  | 162 | 1.0 | NA |
| Spot 35  | 806  | 11691 | 0.5 | 18.2245 | 2.1 | 0.1874 | 2.3  | 0.0254 | 0.5 | 0.24 | 161.8 | 0.9 | 174.4 | 3.7  | 348.6  | 50.3  | 162 | 0.9 | NA |
| Spot 25  | 602  | 9843  | 1.1 | 18.1578 | 2.1 | 0.1877 | 3.2  | 0.0255 | 0.8 | 0.23 | 162.1 | 1.2 | 174.7 | 5.1  | 348.7  | 70.4  | 162 | 1.2 | NA |
| Spot 14  | 366  | 4542  | 1.4 | 16.0713 | 2.7 | 0.2074 | 3.4  | 0.0255 | 0.8 | 0.23 | 162.2 | 1.3 | 191.4 | 6.0  | 568.3  | 72.7  | 162 | 1.3 | NA |
| Spot 60  | 774  | 12249 | 1.7 | 18.3765 | 1.5 | 0.1868 | 1.9  | 0.0255 | 0.5 | 0.27 | 162.3 | 0.8 | 173.9 | 3.1  | 333.9  | 42.5  | 162 | 0.8 | NA |
| Spot 55  | 254  | 499   | 1.6 | 11.5337 | 4.0 | 0.2018 | 16.1 | 0.0255 | 0.6 | 0.03 | 162.4 | 0.9 | 186.7 | 27.4 | 506.5  | 355.2 | 162 | 0.9 | NA |
| Spot 36  | 987  | 15328 | 1.6 | 19.2130 | 1.2 | 0.1792 | 2.2  | 0.0255 | 0.6 | 0.25 | 162.4 | 0.9 | 167.4 | 3.4  | 238.3  | 49.7  | 162 | 0.9 | NA |
| Spot 108 | 675  | 9572  | 1.5 | 18.3935 | 1.8 | 0.1861 | 2.7  | 0.0256 | 0.6 | 0.22 | 162.7 | 0.9 | 173.3 | 4.3  | 320.3  | 59.5  | 163 | 0.9 | NA |
| Spot 103 | 600  | 8018  | 1.6 | 17.6043 | 1.9 | 0.1941 | 2.1  | 0.0256 | 0.5 | 0.26 | 162.9 | 0.9 | 180.1 | 3.5  | 412.0  | 45.3  | 163 | 0.9 | NA |
| Spot 80  | 544  | 7365  | 1.2 | 17.5106 | 1.8 | 0.1946 | 2.2  | 0.0256 | 0.6 | 0.27 | 163.0 | 1.0 | 180.5 | 3.7  | 416.4  | 47.7  | 163 | 1.0 | NA |
| Spot 77  | 293  | 3993  | 1.1 | 15.8358 | 3.2 | 0.2111 | 4.5  | 0.0257 | 0.5 | 0.10 | 163.4 | 0.7 | 194.5 | 7.9  | 590.7  | 96.9  | 163 | 0.7 | NA |
| Spot 85  | 210  | 2831  | 1.8 | 14.3027 | 3.2 | 0.2298 | 5.5  | 0.0257 | 0.6 | 0.11 | 163.5 | 1.0 | 210.0 | 10.4 | 770.8  | 114.6 | 163 | 1.0 | NA |
| Spot 34  | 250  | 3584  | 1.3 | 13.8944 | 3.9 | 0.2401 | 5.0  | 0.0257 | 0.6 | 0.12 | 163.6 | 1.0 | 218.5 | 9.8  | 861.4  | 102.6 | 164 | 1.0 | NA |
| Spot 15  | 606  | 10100 | 1.8 | 17.9283 | 1.7 | 0.1927 | 3.1  | 0.0257 | 0.6 | 0.20 | 163.7 | 1.0 | 178.9 | 5.1  | 385.1  | 68.4  | 164 | 1.0 | NA |
| Spot 98  | 855  | 11723 | 1.8 | 18.6216 | 1.5 | 0.1862 | 2.0  | 0.0257 | 0.8 | 0.41 | 163.8 | 1.3 | 173.4 | 3.2  | 306.2  | 41.1  | 164 | 1.3 | NA |
| Spot 107 | 924  | 14346 | 1.5 | 19.0584 | 1.4 | 0.1827 | 2.0  | 0.0258 | 0.6 | 0.31 | 164.0 | 1.0 | 170.4 | 3.1  | 260.6  | 43.3  | 164 | 1.0 | NA |
| Spot 62  | 530  | 8103  | 1.9 | 18.3452 | 1.5 | 0.1872 | 2.8  | 0.0258 | 0.5 | 0.18 | 164.0 | 0.8 | 174.2 | 4.4  | 314.7  | 61.9  | 164 | 0.8 | NA |
| Spot 39  | 762  | 11005 | 1.9 | 18.1602 | 1.5 | 0.1911 | 2.6  | 0.0259 | 0.6 | 0.23 | 164.7 | 1.0 | 177.5 | 4.2  | 351.5  | 56.6  | 165 | 1.0 | NA |
| Spot 113 | 184  | 2873  | 1.3 | 15.0327 | 3.8 | 0.2194 | 6.4  | 0.0259 | 0.6 | 0.09 | 165.0 | 1.0 | 201.4 | 11.8 | 653.1  | 137.7 | 165 | 1.0 | NA |
| Spot 102 | 791  | 3061  | 1.6 | 17.1847 | 1.6 | 0.1910 | 6.3  | 0.0259 | 0.6 | 0.09 | 165.1 | 0.9 | 177.4 | 10.3 | 345.0  | 143.2 | 165 | 0.9 | NA |
| Spot 57  | 853  | 8519  | 2.2 | 18.4665 | 1.8 | 0.1871 | 2.5  | 0.0259 | 0.8 | 0.33 | 165.1 | 1.3 | 174.2 | 4.0  | 298.7  | 53.2  | 165 | 1.3 | NA |
| Spot 64  | 777  | 7683  | 1.0 | 18.4474 | 1.6 | 0.1872 | 2.8  | 0.0260 | 0.6 | 0.22 | 165.4 | 1.0 | 174.3 | 4.5  | 296.4  | 62.3  | 165 | 1.0 | NA |
| Spot 109 | 399  | 6446  | 0.9 | 16.4646 | 2.4 | 0.2094 | 4.3  | 0.0260 | 0.5 | 0.12 | 165.6 | 0.9 | 193.1 | 7.6  | 544.0  | 93.9  | 166 | 0.9 | NA |
| Spot 118 | 1410 | 19169 | 1.5 | 19.1971 | 1.0 | 0.1840 | 1.6  | 0.0260 | 0.5 | 0.34 | 165.7 | 0.9 | 171.5 | 2.5  | 252.6  | 34.4  | 166 | 0.9 | NA |
| Spot 104 | 394  | 5998  | 1.5 | 15.7924 | 2.7 | 0.2186 | 4.4  | 0.0260 | 0.6 | 0.13 | 165.7 | 0.9 | 200.7 | 7.9  | 635.5  | 93.1  | 166 | 0.9 | NA |
| Spot 1   | 652  | 10517 | 1.5 | 18.2837 | 1.5 | 0.1916 | 2.0  | 0.0261 | 0.5 | 0.24 | 165.8 | 0.8 | 178.0 | 3.2  | 342.9  | 43.6  | 166 | 0.8 | NA |
| Spot 6   | 1363 | 21015 | 2.0 | 19.5170 | 0.9 | 0.1821 | 1.4  | 0.0261 | 0.5 | 0.32 | 166.3 | 0.8 | 169.9 | 2.2  | 220.0  | 31.3  | 166 | 0.8 | NA |
| Spot 90  | 1004 | 16963 | 2.3 | 19.2127 | 1.3 | 0.1850 | 2.1  | 0.0262 | 0.7 | 0.34 | 166.6 | 1.1 | 172.3 | 3.3  | 251.6  | 44.9  | 167 | 1.1 | NA |
| Spot 100 | 1099 | 14567 | 1.0 | 19.5747 | 1.2 | 0.1816 | 1.9  | 0.0263 | 0.5 | 0.28 | 167.4 | 0.9 | 169.4 | 2.9  | 197.3  | 41.8  | 167 | 0.9 | NA |
| Spot 67  | 913  | 13624 | 1.4 | 18.9135 | 1.2 | 0.1885 | 1.9  | 0.0264 | 0.5 | 0.28 | 168.1 | 0.9 | 175.4 | 3.0  | 274.3  | 41.1  | 168 | 0.9 | NA |
| Spot 40  | 667  | 2101  | 1.5 | 16.4545 | 2.3 | 0.1974 | 8.0  | 0.0267 | 0.6 | 0.07 | 169.9 | 1.0 | 182.9 | 13.4 | 354.6  | 181.2 | 170 | 1.0 | NA |
| Spot 37  | 705  | 9607  | 1.2 | 18.7662 | 1.4 | 0.1915 | 2.7  | 0.0269 | 0.7 | 0.24 | 171.2 | 1.1 | 177.9 | 4.4  | 268.3  | 60.0  | 171 | 1.1 | NA |
| Spot 112 | 1545 | 22508 | 0.6 | 19.3281 | 0.9 | 0.1894 | 1.4  | 0.0269 | 0.7 | 0.48 | 171.3 | 1.1 | 176.1 | 2.3  | 241.6  | 28.4  | 171 | 1.1 | NA |
| Spot 84  | 515  | 7614  | 1.8 | 18.4685 | 1.6 | 0.1941 | 2.0  | 0.0269 | 0.5 | 0.25 | 171.3 | 0.8 | 180.2 | 3.4  | 297.6  | 44.9  | 171 | 0.8 | NA |
| Spot 23  | 350  | 5920  | 1.7 | 16.1386 | 2.3 | 0.2214 | 4.4  | 0.0270 | 0.6 | 0.14 | 171.9 | 1.0 | 203.1 | 8.2  | 582.1  | 95.3  | 172 | 1.0 | NA |
| Spot 91  | 221  | 3640  | 1.7 | 14.9659 | 3.1 | 0.2345 | 3.8  | 0.0270 | 0.5 | 0.12 | 171.9 | 0.8 | 213.9 | 7.4  | 705.3  | 80.7  | 172 | 0.8 | NA |
| Spot 59  | 249  | 3418  | 1.2 | 14.6421 | 3.2 | 0.2385 | 5.0  | 0.0270 | 0.6 | 0.12 | 172.0 | 1.0 | 217.2 | 9.7  | 739.9  | 104.0 | 172 | 1.0 | NA |
| Spot 28  | 300  | 3713  | 2.3 | 16.0258 | 3.0 | 0.2179 | 3.5  | 0.0271 | 0.6 | 0.18 | 172.4 | 1.1 | 200.2 | 6.3  | 541.9  | 74.5  | 172 | 1.1 | NA |
| Spot 38  | 657  | 10350 | 1.5 | 18.0646 | 1.9 | 0.2012 | 2.4  | 0.0271 | 0.5 | 0.22 | 172.6 | 0.9 | 186.1 | 4.1  | 361.2  | 53.2  | 173 | 0.9 | NA |
| Spot 48  | 229  | 3766  | 1.9 | 14.7061 | 3.7 | 0.2393 | 5.2  | 0.0272 | 0.7 | 0.13 | 172.8 | 1.2 | 217.8 | 10.2 | 737.4  | 108.7 | 173 | 1.2 | NA |
| Spot 52  | 580  | 9459  | 1.5 | 18.3164 | 1.6 | 0.1982 | 2.9  | 0.0272 | 0.7 | 0.24 | 173.0 | 1.2 | 183.6 | 4.9  | 322.2  | 63.8  | 173 | 1.2 | NA |
| Spot 7   | 380  | 6202  | 1.0 | 16.4269 | 2.9 | 0.2198 | 3.6  | 0.0272 | 0.6 | 0.16 | 173.2 | 1.0 | 201.7 | 6.6  | 549.9  | 78.1  | 173 | 1.0 | NA |
| Spot 95  | 497  | 7696  | 2.0 | 18.3229 | 1.8 | 0.1983 | 2.1  | 0.0273 | 0.6 | 0.27 | 173.4 | 1.0 | 183.7 | 3.5  | 317.2  | 46.0  | 173 | 1.0 | NA |
| Spot 17  | 839  | 13042 | 1.3 | 18.6679 | 1.2 | 0.1974 | 1.9  | 0.0273 | 0.5 | 0.29 | 173.6 | 0.9 | 182.9 | 3.2  | 305.2  | 41.2  | 174 | 0.9 | NA |
| Spot 88  | 851  | 12662 | 1.4 | 18.2199 | 1.4 | 0.2024 | 1.8  | 0.0273 | 0.6 | 0.34 | 173.7 | 1.1 | 187.2 | 3.1  | 360.6  | 38.3  | 174 | 1.1 | NA |
| Spot 82  | 798  | 15650 | 1.3 | 18.9065 | 1.3 | 0.1958 | 2.2  | 0.0273 | 0.6 | 0.27 | 173.9 | 1.0 | 181.5 | 3.6  | 282.6  | 47.6  | 174 | 1.0 | NA |
| Spot 54  | 385  | 5779  | 1.5 | 16.9108 | 2.3 | 0.2131 | 3.0  | 0.0274 | 0.6 | 0.19 | 174.2 | 1.0 | 196.2 | 5.4  | 469.0  | 65.8  | 174 | 1.0 | NA |
| Spot 114 | 593  | 9477  | 1.7 | 18.4556 | 1.6 | 0.1987 | 2.9  | 0.0274 | 0.5 | 0.18 | 174.4 | 0.9 | 184.0 | 4.9  | 310.4  | 65.3  | 174 | 0.9 | NA |
| Spot 12  | 594  | 9872  | 1.2 | 18.7941 | 1.6 | 0.1955 | 2.4  | 0.0274 | 0.6 | 0.25 | 174.4 | 1.0 | 181.3 | 3.9  | 272.4  | 52.3  | 174 | 1.0 | NA |
| Spot 75  | 123  | 2464  | 1.3 | 12.0066 | 5.3 | 0.2939 | 6.8  | 0.0274 | 0.5 | 0.08 | 174.4 | 0.9 | 261.6 | 15.7 | 1139.3 | 134.9 | 174 | 0.9 | NA |
| Spot 120 | 173  | 3155  | 1.4 | 13.3138 | 4.5 | 0.2668 | 5.2  | 0.0274 | 0.5 | 0.10 | 174.5 | 0.9 | 240.1 | 11.2 | 943.5  | 107.0 | 175 | 0.9 | NA |
| Spot 61  | 238  | 3867  | 1.7 | 15.8770 | 2.5 | 0.2237 | 3.8  | 0.0274 | 0.6 | 0.15 | 174.6 | 1.0 | 205.0 | 7.1  | 571.2  | 82.5  | 175 | 1.0 | NA |
| Spot 81  | 424  | 6825  | 1.5 | 17.6025 | 1.8 | 0.2069 | 2.5  | 0.0275 | 0.6 | 0.23 | 174.6 | 1.0 | 191.0 | 4.4  | 397.8  | 55.2  | 175 | 1.0 | NA |
| Spot 93  | 358  | 5591  | 2.2 | 16.4576 | 2.6 | 0.2203 | 3.1  | 0.0275 | 0.6 | 0.19 | 174.7 | 1.0 | 202.2 | 5.7  | 536.4  | 66.6  | 175 | 1.0 | NA |
| Spot 30  | 1072 | 17438 | 1.1 | 19.0808 | 1.1 | 0.1956 | 1.4  | 0.0276 | 0.6 | 0.40 | 175.5 | 1.0 | 181.4 | 2.4  | 258.3  | 30.1  | 176 | 1.0 | NA |
| Spot 96  | 683  | 9862  | 1.8 | 18.6263 | 1.4 | 0.1989 | 2.4  | 0.0276 | 0.5 | 0.22 | 175.6 | 0.9 | 184.2 | 4.0  | 296.8  | 53.4  | 176 | 0.9 | NA |
| Spot 111 | 236  | 3104  | 1.2 | 15.3186 | 3.1 | 0.2305 | 4.3  | 0.0276 | 0.5 | 0.12 | 175.6 | 0.9 | 210.6 | 8.2  | 622.4  | 92.2  | 176 | 0.9 | NA |
| Spot 11  | 1511 | 25220 | 2.1 | 19.5980 | 0.9 | 0.1923 | 1.4  | 0.0276 | 0.5 | 0.38 | 175.8 | 0.9 | 178.6 | 2.3  | 215.7  | 29.7  | 176 | 0.9 | NA |
| Spot 115 | 813  | 14522 | 1.2 | 18.9215 | 1.6 | 0.1973 | 2.0  | 0.0276 | 0.9 | 0.44 | 175.8 | 1.6 | 182.9 | 3.4  | 275.5  | 41.9  | 176 | 1.6 | NA |
| Spot 16  | 498  | 8768  | 1.0 | 18.3757 | 1.8 | 0.2019 | 3.4  | 0.0278 | 0.6 | 0.17 | 176.5 | 1.0 | 186.7 | 5.8  | 318.4  | 75.8  | 176 | 1.0 | NA |
| Spot 76  | 455  | 7473  | 2.5 | 17.3325 | 1.9 | 0.2145 | 2.6  | 0.0278 | 0.5 | 0.19 | 177.0 | 0.9 | 197.3 | 4.7  | 447.2  | 57.7  | 177 | 0.9 | NA |
| Spot 46  | 256  | 3979  | 1.6 | 14.1731 | 3.1 | 0.2566 | 4.8  | 0.0279 | 0.7 | 0.13 | 177.6 | 1.1 | 232.0 | 10.0 | 826.4  | 100.0 | 178 | 1.1 | NA |
| Spot 119 | 757  | 13415 | 1.5 | 18.9133 | 1.3 | 0.1994 | 1.8  | 0.0280 | 0.5 | 0.27 | 177.7 | 0.8 | 184.6 | 3.0  | 273.9  | 39.1  | 178 | 0.8 | NA |
| Spot 97  | 468  | 8088  | 1.6 | 17.3915 | 2.0 | 0.2149 | 2.4  | 0.0280 | 0.5 | 0.21 | 177.7 | 0.9 | 197.7 | 4.3  | 442.7  | 52.5  | 178 | 0.9 | NA |
| Spot 92  | 874  | 12439 | 2.2 | 18.7097 | 1.4 | 0.2021 | 2.3  | 0.0280 | 1.0 | 0.44 | 178.1 | 1.8 | 186.9 | 3.9  | 299.7  | 47.4  | 178 | 1.8 | NA |
| Spot 56  | 831  | 13361 | 1.3 | 18.8200 | 1.3 | 0.2008 | 2.0  | 0.0280 | 0.5 | 0.23 | 178.3 | 0.8 | 185.8 | 3.4  | 281.8  | 45.1  | 178 | 0.8 | NA |
| Spot 101 | 609  | 10512 | 2.6 | 18.0630 | 1.6 | 0.2100 | 3.0  | 0.0282 | 0.7 | 0.23 | 179.5 | 1.3 | 193.6 | 5.3  |        |       |     |     |    |

ELM18DVT-2

|          |      |       |     |         |      |        |       |        |     |      |      |     |       |      |        |       |      |     |    |
|----------|------|-------|-----|---------|------|--------|-------|--------|-----|------|------|-----|-------|------|--------|-------|------|-----|----|
| Spot 111 | 147  | 63    | 1.0 | 3.8904  | 15.0 | 0.0078 | 247.9 | 0.0040 | 0.5 | 0.00 | 25.9 | 0.1 | 7.9   | 19.4 | NA     | NA    | 25.9 | 0.1 | NA |
| Spot 63  | 99   | 280   | 0.8 | 4.4738  | 19.3 | 0.1181 | 24.0  | 0.0048 | 0.5 | 0.02 | 30.7 | 0.1 | 113.4 | 25.7 | 2650.6 | 403.7 | 30.7 | 0.1 | NA |
| Spot 81  | 797  | 365   | 0.5 | 8.9363  | 7.8  | 0.0483 | 36.4  | 0.0048 | 0.5 | 0.01 | 31.0 | 0.2 | 47.9  | 17.1 | 1009.4 | 763.5 | 31.0 | 0.2 | NA |
| Spot 38  | 362  | 255   | 0.5 | 6.2549  | 8.1  | 0.0712 | 16.5  | 0.0049 | 0.7 | 0.04 | 31.3 | 0.2 | 69.8  | 11.1 | 1732.6 | 304.4 | 31.3 | 0.2 | NA |
| Spot 23  | 138  | 441   | 1.0 | 5.3344  | 15.0 | 0.1082 | 19.2  | 0.0050 | 0.5 | 0.03 | 31.9 | 0.2 | 104.3 | 19.0 | 2436.4 | 328.3 | 31.9 | 0.2 | NA |
| Spot 82  | 284  | 1004  | 1.0 | 8.2566  | 8.5  | 0.0758 | 9.6   | 0.0051 | 0.6 | 0.07 | 32.8 | 0.2 | 74.2  | 6.9  | 1759.7 | 175.6 | 32.8 | 0.2 | NA |
| Spot 16  | 126  | 395   | 0.9 | 4.2475  | 18.6 | 0.1456 | 21.1  | 0.0052 | 0.9 | 0.04 | 33.1 | 0.3 | 138.0 | 27.3 | 2866.3 | 347.6 | 33.1 | 0.3 | NA |
| Spot 18  | 326  | 394   | 1.2 | 7.2262  | 9.3  | 0.0734 | 23.4  | 0.0052 | 0.6 | 0.03 | 33.1 | 0.2 | 71.9  | 16.2 | 1683.6 | 437.9 | 33.1 | 0.2 | NA |
| Spot 68  | 477  | 500   | 1.1 | 9.9040  | 6.5  | 0.0518 | 27.6  | 0.0052 | 0.5 | 0.02 | 33.3 | 0.2 | 51.3  | 13.8 | 999.0  | 572.1 | 33.3 | 0.2 | NA |
| Spot 28  | 462  | 1516  | 1.0 | 10.6225 | 6.5  | 0.0608 | 9.1   | 0.0052 | 1.0 | 0.11 | 33.5 | 0.3 | 59.9  | 5.3  | 1305.3 | 176.5 | 33.5 | 0.3 | NA |
| Spot 118 | 231  | 763   | 1.6 | 5.8402  | 12.0 | 0.1116 | 12.4  | 0.0052 | 0.6 | 0.05 | 33.7 | 0.2 | 107.4 | 12.6 | 2395.7 | 210.8 | 33.7 | 0.2 | NA |
| Spot 53  | 218  | 635   | 1.0 | 7.4772  | 10.5 | 0.0816 | 17.2  | 0.0053 | 0.7 | 0.04 | 33.9 | 0.2 | 79.6  | 13.2 | 1837.6 | 314.4 | 33.9 | 0.2 | NA |
| Spot 119 | 248  | 716   | 0.8 | 8.2017  | 8.4  | 0.0746 | 10.8  | 0.0053 | 0.5 | 0.05 | 33.9 | 0.2 | 73.1  | 7.6  | 1670.6 | 199.2 | 33.9 | 0.2 | NA |
| Spot 113 | 418  | 1371  | 0.9 | 10.6132 | 7.9  | 0.0611 | 9.2   | 0.0053 | 0.9 | 0.10 | 34.0 | 0.3 | 60.2  | 5.4  | 1286.9 | 179.5 | 34.0 | 0.3 | NA |
| Spot 21  | 433  | 1601  | 1.4 | 9.9247  | 7.4  | 0.0671 | 9.7   | 0.0053 | 0.7 | 0.08 | 34.1 | 0.3 | 65.9  | 6.2  | 1462.6 | 184.3 | 34.1 | 0.3 | NA |
| Spot 95  | 194  | 552   | 0.5 | 5.6800  | 11.3 | 0.1120 | 15.5  | 0.0053 | 0.5 | 0.03 | 34.1 | 0.2 | 107.8 | 15.8 | 2380.3 | 265.0 | 34.1 | 0.2 | NA |
| Spot 107 | 335  | 1062  | 0.9 | 9.6556  | 7.7  | 0.0662 | 9.6   | 0.0053 | 0.6 | 0.06 | 34.2 | 0.2 | 65.1  | 6.0  | 1433.8 | 182.8 | 34.2 | 0.2 | NA |
| Spot 11  | 493  | 1404  | 0.8 | 11.1844 | 6.3  | 0.0581 | 7.6   | 0.0053 | 0.5 | 0.06 | 34.2 | 0.2 | 57.3  | 4.2  | 1175.3 | 149.5 | 34.2 | 0.2 | NA |
| Spot 71  | 608  | 2102  | 1.5 | 11.4135 | 6.5  | 0.0595 | 10.6  | 0.0053 | 0.7 | 0.06 | 34.3 | 0.2 | 58.7  | 6.0  | 1220.6 | 207.6 | 34.3 | 0.2 | NA |
| Spot 36  | 522  | 1600  | 0.6 | 11.5412 | 6.7  | 0.0571 | 8.6   | 0.0053 | 0.6 | 0.07 | 34.3 | 0.2 | 56.4  | 4.7  | 1134.9 | 170.4 | 34.3 | 0.2 | NA |
| Spot 110 | 218  | 682   | 1.0 | 5.9046  | 12.6 | 0.1109 | 15.2  | 0.0053 | 0.6 | 0.04 | 34.4 | 0.2 | 106.8 | 15.4 | 2351.6 | 260.5 | 34.4 | 0.2 | NA |
| Spot 114 | 568  | 1753  | 0.7 | 10.9388 | 5.9  | 0.0615 | 7.0   | 0.0053 | 0.6 | 0.09 | 34.4 | 0.2 | 60.6  | 4.1  | 1277.5 | 135.3 | 34.4 | 0.2 | NA |
| Spot 24  | 385  | 1197  | 0.7 | 10.5170 | 7.1  | 0.0613 | 8.1   | 0.0054 | 0.6 | 0.08 | 34.4 | 0.2 | 60.4  | 4.7  | 1270.4 | 157.1 | 34.4 | 0.2 | NA |
| Spot 50  | 375  | 626   | 0.8 | 8.6881  | 8.3  | 0.0685 | 19.8  | 0.0054 | 0.5 | 0.03 | 34.4 | 0.2 | 67.3  | 12.9 | 1483.7 | 379.1 | 34.4 | 0.2 | NA |
| Spot 74  | 693  | 2184  | 1.9 | 11.1066 | 7.8  | 0.0618 | 8.6   | 0.0054 | 0.6 | 0.07 | 34.4 | 0.2 | 60.9  | 5.1  | 1285.6 | 167.9 | 34.4 | 0.2 | NA |
| Spot 98  | 743  | 2268  | 0.7 | 12.9289 | 4.4  | 0.0525 | 5.5   | 0.0054 | 0.7 | 0.13 | 34.4 | 0.2 | 51.9  | 2.8  | 959.9  | 112.5 | 34.4 | 0.2 | NA |
| Spot 104 | 609  | 1801  | 0.7 | 12.2058 | 5.3  | 0.0547 | 9.1   | 0.0054 | 0.6 | 0.07 | 34.5 | 0.2 | 54.0  | 4.8  | 1041.0 | 184.2 | 34.5 | 0.2 | NA |
| Spot 44  | 310  | 799   | 0.7 | 8.4904  | 11.4 | 0.0743 | 13.5  | 0.0054 | 0.6 | 0.04 | 34.5 | 0.2 | 72.7  | 9.5  | 1631.0 | 252.7 | 34.5 | 0.2 | NA |
| Spot 70  | 406  | 1186  | 2.7 | 10.4815 | 7.1  | 0.0621 | 8.9   | 0.0054 | 0.7 | 0.08 | 34.6 | 0.2 | 61.2  | 5.3  | 1283.4 | 172.4 | 34.6 | 0.2 | NA |
| Spot 19  | 371  | 1307  | 0.5 | 10.5402 | 6.5  | 0.0623 | 8.1   | 0.0054 | 0.6 | 0.07 | 34.6 | 0.2 | 61.3  | 4.8  | 1288.7 | 158.4 | 34.6 | 0.2 | NA |
| Spot 55  | 560  | 1847  | 1.0 | 11.3496 | 6.7  | 0.0600 | 8.8   | 0.0054 | 0.6 | 0.07 | 34.6 | 0.2 | 59.1  | 5.0  | 1214.4 | 172.1 | 34.6 | 0.2 | NA |
| Spot 48  | 222  | 667   | 0.6 | 7.2079  | 12.1 | 0.0881 | 13.7  | 0.0054 | 0.6 | 0.04 | 34.7 | 0.2 | 85.7  | 11.3 | 1934.6 | 246.2 | 34.7 | 0.2 | NA |
| Spot 41  | 701  | 1970  | 1.3 | 13.1262 | 3.7  | 0.0512 | 7.2   | 0.0054 | 0.5 | 0.08 | 34.7 | 0.2 | 50.7  | 3.6  | 891.7  | 148.1 | 34.7 | 0.2 | NA |
| Spot 96  | 945  | 2827  | 0.6 | 12.5064 | 4.5  | 0.0559 | 6.2   | 0.0054 | 0.5 | 0.08 | 34.7 | 0.2 | 55.2  | 3.3  | 1068.7 | 123.4 | 34.7 | 0.2 | NA |
| Spot 26  | 347  | 1124  | 1.1 | 10.1601 | 9.0  | 0.0639 | 11.0  | 0.0054 | 0.5 | 0.05 | 34.8 | 0.2 | 62.9  | 6.7  | 1330.6 | 212.3 | 34.8 | 0.2 | NA |
| Spot 79  | 2109 | 2290  | 0.4 | 16.3726 | 2.1  | 0.0409 | 6.3   | 0.0054 | 0.5 | 0.08 | 34.8 | 0.2 | 40.7  | 2.5  | 401.9  | 140.4 | 34.8 | 0.2 | NA |
| Spot 120 | 183  | 547   | 1.3 | 5.3459  | 15.1 | 0.1224 | 18.7  | 0.0054 | 0.7 | 0.04 | 34.8 | 0.3 | 117.2 | 20.7 | 2494.5 | 317.4 | 34.8 | 0.3 | NA |
| Spot 33  | 514  | 1940  | 1.6 | 11.0174 | 5.1  | 0.0623 | 8.9   | 0.0054 | 0.6 | 0.06 | 34.9 | 0.2 | 61.4  | 5.3  | 1276.0 | 172.6 | 34.9 | 0.2 | NA |
| Spot 22  | 716  | 1996  | 0.5 | 12.5296 | 4.9  | 0.0542 | 9.9   | 0.0054 | 0.6 | 0.06 | 34.9 | 0.2 | 53.6  | 5.1  | 997.9  | 200.2 | 34.9 | 0.2 | NA |
| Spot 73  | 323  | 921   | 0.6 | 8.3312  | 9.1  | 0.0788 | 10.1  | 0.0054 | 0.5 | 0.05 | 34.9 | 0.2 | 77.0  | 7.5  | 1717.5 | 185.4 | 34.9 | 0.2 | NA |
| Spot 31  | 1323 | 4264  | 0.5 | 16.9869 | 3.1  | 0.0414 | 4.4   | 0.0054 | 0.8 | 0.19 | 34.9 | 0.3 | 41.2  | 1.8  | 423.1  | 95.8  | 34.9 | 0.3 | NA |
| Spot 66  | 531  | 1744  | 0.8 | 10.2021 | 6.8  | 0.0675 | 8.9   | 0.0054 | 0.6 | 0.07 | 34.9 | 0.2 | 66.3  | 5.7  | 1427.6 | 169.8 | 34.9 | 0.2 | NA |
| Spot 87  | 566  | 1959  | 0.9 | 12.2872 | 5.1  | 0.0557 | 7.6   | 0.0054 | 0.5 | 0.06 | 35.0 | 0.2 | 55.0  | 4.1  | 1046.4 | 153.2 | 35.0 | 0.2 | NA |
| Spot 94  | 339  | 424   | 0.9 | 7.7502  | 8.4  | 0.0725 | 23.8  | 0.0054 | 1.1 | 0.04 | 35.0 | 0.4 | 71.0  | 16.3 | 1556.2 | 453.0 | 35.0 | 0.4 | NA |
| Spot 58  | 894  | 2614  | 2.0 | 14.2573 | 4.7  | 0.0488 | 7.9   | 0.0055 | 0.7 | 0.08 | 35.1 | 0.2 | 48.4  | 3.8  | 771.5  | 166.9 | 35.1 | 0.2 | NA |
| Spot 27  | 1451 | 4601  | 1.4 | 16.5630 | 2.6  | 0.0429 | 4.6   | 0.0055 | 0.7 | 0.15 | 35.1 | 0.2 | 42.7  | 1.9  | 492.7  | 101.2 | 35.1 | 0.2 | NA |
| Spot 7   | 269  | 698   | 0.8 | 6.8063  | 10.5 | 0.0961 | 16.7  | 0.0055 | 0.6 | 0.03 | 35.1 | 0.2 | 93.2  | 14.9 | 2065.4 | 296.4 | 35.1 | 0.2 | NA |
| Spot 72  | 1032 | 3111  | 2.1 | 15.7768 | 3.5  | 0.0443 | 8.6   | 0.0055 | 0.4 | 0.05 | 35.1 | 0.2 | 44.0  | 3.7  | 558.2  | 188.1 | 35.1 | 0.2 | NA |
| Spot 109 | 5894 | 2070  | 0.5 | 18.3187 | 1.2  | 0.0358 | 1.4   | 0.0055 | 0.5 | 0.35 | 35.1 | 0.2 | 35.7  | 0.5  | 71.5   | 31.9  | 35.1 | 0.2 | NA |
| Spot 6   | 515  | 1915  | 0.5 | 11.0212 | 6.4  | 0.0628 | 7.1   | 0.0055 | 1.0 | 0.14 | 35.2 | 0.3 | 61.8  | 4.2  | 1273.5 | 136.5 | 35.2 | 0.3 | NA |
| Spot 1   | 3102 | 9974  | 3.4 | 19.1191 | 1.4  | 0.0383 | 2.1   | 0.0055 | 0.6 | 0.27 | 35.2 | 0.2 | 38.1  | 0.8  | 226.6  | 47.6  | 35.2 | 0.2 | NA |
| Spot 37  | 687  | 1830  | 0.4 | 12.3220 | 5.6  | 0.0552 | 7.5   | 0.0055 | 0.5 | 0.07 | 35.2 | 0.2 | 54.6  | 4.0  | 1017.3 | 152.1 | 35.2 | 0.2 | NA |
| Spot 90  | 1089 | 3523  | 0.6 | 15.9478 | 2.8  | 0.0445 | 7.4   | 0.0055 | 0.7 | 0.09 | 35.4 | 0.2 | 44.2  | 3.2  | 553.6  | 160.2 | 35.4 | 0.2 | NA |
| Spot 100 | 3042 | 8590  | 0.4 | 18.8876 | 1.6  | 0.0389 | 2.4   | 0.0055 | 0.6 | 0.26 | 35.4 | 0.2 | 38.8  | 0.9  | 255.5  | 52.2  | 35.4 | 0.2 | NA |
| Spot 39  | 383  | 1428  | 0.7 | 9.2928  | 7.7  | 0.0742 | 10.3  | 0.0055 | 0.6 | 0.06 | 35.4 | 0.2 | 72.7  | 7.2  | 1581.6 | 192.7 | 35.4 | 0.2 | NA |
| Spot 84  | 6348 | 10244 | 1.2 | 19.5374 | 1.0  | 0.0378 | 1.3   | 0.0055 | 0.6 | 0.45 | 35.4 | 0.2 | 37.7  | 0.5  | 185.7  | 27.6  | 35.4 | 0.2 | NA |
| Spot 3   | 945  | 2671  | 0.9 | 13.4598 | 3.6  | 0.0523 | 4.7   | 0.0055 | 0.6 | 0.13 | 35.5 | 0.2 | 51.7  | 2.4  | 891.5  | 96.4  | 35.5 | 0.2 | NA |
| Spot 83  | 506  | 1513  | 1.3 | 12.7757 | 4.7  | 0.0524 | 10.0  | 0.0055 | 0.6 | 0.06 | 35.5 | 0.2 | 51.9  | 5.0  | 895.6  | 206.0 | 35.5 | 0.2 | NA |
| Spot 34  | 427  | 1468  | 1.1 | 10.6035 | 5.7  | 0.0643 | 12.5  | 0.0055 | 0.6 | 0.05 | 35.5 | 0.2 | 63.3  | 7.7  | 1303.2 | 244.3 | 35.5 | 0.2 | NA |
| Spot 59  | 1284 | 4534  | 2.4 | 15.5995 | 3.7  | 0.0466 | 4.6   | 0.0055 | 0.5 | 0.12 | 35.5 | 0.2 | 46.2  | 2.1  | 645.8  | 99.1  | 35.5 | 0.2 | NA |
| Spot 17  | 641  | 1907  | 1.9 | 12.3639 | 4.7  | 0.0558 | 6.3   | 0.0055 | 0.6 | 0.09 | 35.5 | 0.2 | 55.1  | 3.4  | 1019.5 | 127.9 | 35.5 | 0.2 | NA |
| Spot 78  | 519  | 1916  | 0.9 | 10.5608 | 6.3  | 0.0668 | 8.1   | 0.0055 | 0.6 | 0.07 | 35.6 | 0.2 | 65.6  | 5.2  | 1372.0 | 156.5 | 35.6 | 0.2 | NA |
| Spot 112 | 2573 | 8503  | 3.1 | 18.5145 | 1.7  | 0.0398 | 3.5   | 0.0055 | 0.7 | 0.19 | 35.6 | 0.2 | 39.6  | 1.4  | 292.9  | 79.4  | 35.6 | 0.2 | NA |
| Spot 9   | 1543 | 4572  | 1.7 | 16.1243 | 3.0  | 0.0449 | 3.7   | 0.0055 | 0.5 | 0.15 | 35.6 | 0.2 | 44.6  | 1.6  | 556.5  | 80.6  | 35.6 | 0.2 | NA |
| Spot 108 | 1849 | 4518  | 2.8 | 17.2624 | 2.6  | 0.0419 | 3.0   | 0.0055 | 0.6 | 0.21 | 35.7 | 0.2 | 41.7  | 1.2  | 401.2  | 66.8  | 35.7 | 0.2 | NA |
| Spot 80  | 835  | 2621  | 1.1 | 14.8321 | 3.7  | 0.0475 | 4.8   | 0.0056 | 0.6 | 0.13 | 35.7 | 0.2 | 47.1  | 2.2  | 672.6  | 102.4 | 35.7 | 0.2 | NA |
| Spot 91  | 1380 | 4159  | 2.0 | 15.9525 | 2.8  | 0.0454 | 4.1   | 0.0056 | 0.6 | 0.15 | 35.7 |     |       |      |        |       |      |     |    |

|             |      |        |      |         |      |         |      |        |     |      |        |      |        |      |        |        |      |      |     |
|-------------|------|--------|------|---------|------|---------|------|--------|-----|------|--------|------|--------|------|--------|--------|------|------|-----|
| Spot 20     | 283  | 179    | 1.2  | 6.3787  | 10.5 | 0.0649  | 82.0 | 0.0061 | 0.6 | 0.01 | 39.3   | 0.2  | 63.9   | 50.8 | 1119.9 | NA     | 39.3 | 0.2  | NA  |
| Spot 54     | 1449 | 7345   | 4.4  | 18.0413 | 1.7  | 0.0539  | 4.1  | 0.0073 | 0.6 | 0.15 | 46.9   | 0.3  | 53.3   | 2.1  | 350.0  | 90.5   | 46.9 | 0.3  | NA  |
| Spot 56     | 458  | 2310   | 6.8  | 11.8455 | 6.4  | 0.0881  | 6.9  | 0.0081 | 0.6 | 0.09 | 52.2   | 0.3  | 85.7   | 5.7  | 1160.4 | 136.1  | 52.2 | 0.3  | NA  |
| Spot 15     | 1241 | 8222   | 38.9 | 17.9496 | 1.8  | 0.0835  | 2.6  | 0.0113 | 0.7 | 0.28 | 72.1   | 0.5  | 81.4   | 2.0  | 362.4  | 55.7   | 72.1 | 0.5  | NA  |
| Spot 69     | 3254 | 31500  | 3.3  | 20.3488 | 0.6  | 0.1159  | 1.0  | 0.0173 | 0.5 | 0.52 | 110.3  | 0.5  | 111.3  | 1.0  | 134.5  | 19.3   | 110  | 0.5  | NA  |
| Spot 62     | 530  | 6969   | 1.5  | 17.5838 | 1.9  | 0.1918  | 3.0  | 0.0253 | 0.7 | 0.23 | 161.1  | 1.1  | 178.1  | 4.9  | 410.3  | 64.9   | 161  | 1.1  | NA  |
| Spot 45     | 799  | 12406  | 1.0  | 18.7657 | 1.2  | 0.1919  | 1.8  | 0.0267 | 0.4 | 0.23 | 169.9  | 0.7  | 178.2  | 2.9  | 290.0  | 39.9   | 170  | 0.7  | NA  |
| Spot 60     | 490  | 26518  | 2.5  | 13.1446 | 0.8  | 0.5558  | 1.0  | 0.0531 | 0.6 | 0.56 | 333.6  | 1.9  | 448.8  | 3.8  | 1092.3 | 17.3   | 334  | 1.9  | NA  |
| Spot 2      | 662  | 25107  | 1.3  | 18.0769 | 1.0  | 0.4709  | 1.4  | 0.0626 | 0.6 | 0.42 | 391.2  | 2.2  | 391.8  | 4.5  | 395.3  | 28.3   | 391  | 2.2  | NA  |
| Spot 88     | 102  | 4501   | 1.5  | 14.9076 | 3.4  | 0.5930  | 4.0  | 0.0673 | 0.6 | 0.15 | 420.0  | 2.3  | 472.8  | 15.0 | 737.5  | 83.2   | 420  | 2.3  | 57  |
| Spot 99     | 185  | 8015   | 1.9  | 17.0027 | 1.5  | 0.6012  | 1.9  | 0.0764 | 0.6 | 0.33 | 474.3  | 2.9  | 478.0  | 7.1  | 495.5  | 38.6   | 474  | 2.9  | 96  |
| Spot 4      | 262  | 27132  | 1.8  | 13.1404 | 0.8  | 1.8665  | 1.2  | 0.1795 | 0.6 | 0.54 | 1064.3 | 6.1  | 1069.3 | 7.6  | 1079.4 | 19.6   | 1079 | 19.6 | 99  |
| Spot 12     | 82   | 8497   | 2.2  | 12.5248 | 1.7  | 2.0416  | 1.8  | 0.1897 | 0.7 | 0.38 | 1119.9 | 7.1  | 1129.5 | 12.6 | 1148.0 | 34.1   | 1148 | 34.1 | 98  |
| Spot 40     | 521  | 61689  | 2.0  | 12.2640 | 0.6  | 2.3481  | 0.9  | 0.2098 | 0.6 | 0.66 | 1227.9 | 6.6  | 1227.0 | 6.4  | 1225.5 | 13.2   | 1225 | 13.2 | 100 |
| Spot 5      | 230  | 32434  | 2.4  | 11.2543 | 1.1  | 2.8716  | 1.6  | 0.2361 | 1.0 | 0.66 | 1366.2 | 12.9 | 1374.5 | 12.0 | 1387.4 | 23.0   | 1387 | 23.0 | 98  |
| Spot 75     | 46   | 6818   | 0.9  | 10.4245 | 2.0  | 3.3452  | 2.4  | 0.2580 | 1.1 | 0.45 | 1479.7 | 13.9 | 1491.7 | 18.5 | 1508.8 | 39.9   | 1509 | 39.9 | 98  |
| Spot 65     | 710  | 103582 | 1.2  | 9.1559  | 0.5  | 4.6478  | 0.7  | 0.3087 | 0.5 | 0.70 | 1734.2 | 7.4  | 1757.9 | 5.8  | 1786.2 | 9.1    | 1786 | 9.1  | 97  |
| Spot 61     | 678  | 92594  | 2.6  | 9.1292  | 0.5  | 4.6127  | 0.8  | 0.3044 | 0.5 | 0.70 | 1713.1 | 8.2  | 1751.6 | 6.5  | 1797.8 | 10.0   | 1798 | 10.0 | 95  |
| Spot 105    | 169  | 31195  | 1.3  | 8.8443  | 0.7  | 5.1224  | 0.9  | 0.3299 | 0.5 | 0.62 | 1838.0 | 8.7  | 1839.8 | 7.5  | 1841.9 | 12.5   | 1842 | 12.5 | 100 |
| Spot 103    | 242  | 49398  | 1.2  | 8.5583  | 0.7  | 5.4959  | 0.9  | 0.3418 | 0.6 | 0.66 | 1895.2 | 10.0 | 1900.0 | 8.0  | 1905.2 | 12.6   | 1905 | 12.6 | 99  |
| Spot 67     | 246  | 32083  | 2.2  | 8.1783  | 0.6  | 5.9019  | 0.8  | 0.3509 | 0.5 | 0.66 | 1938.9 | 9.2  | 1961.5 | 7.2  | 1985.5 | 11.0   | 1986 | 11.0 | 98  |
| Spot 101    | 686  | 53143  | 3.4  | 5.8931  | 0.6  | 11.4628 | 0.8  | 0.4897 | 0.6 | 0.69 | 2569.4 | 12.0 | 2561.6 | 7.7  | 2555.3 | 9.9    | 2555 | 9.9  | 101 |
| Spot 57     | 125  | 42169  | 0.8  | 5.2600  | 0.6  | 13.8559 | 0.8  | 0.5267 | 0.6 | 0.68 | 2727.3 | 12.4 | 2739.9 | 7.7  | 2749.2 | 9.7    | 2749 | 9.7  | 99  |
| ELM18DVT-C6 |      |        |      |         |      |         |      |        |     |      |        |      |        |      |        |        |      |      |     |
| Spot 78     | 368  | 140    | 1.3  | 5.4730  | 9.0  | 0.0521  | 40.1 | 0.0047 | 0.7 | 0.02 | 29.9   | 0.2  | 51.6   | 20.2 | 1225.3 | 821.2  | 29.9 | 0.2  | NA  |
| Spot 102    | 429  | 1063   | 1.0  | 9.4761  | 7.2  | 0.0616  | 14.4 | 0.0048 | 0.5 | 0.04 | 31.2   | 0.2  | 60.7   | 8.5  | 1470.2 | 275.5  | 31.2 | 0.2  | NA  |
| Spot 77     | 329  | 778    | 0.9  | 8.1587  | 10.2 | 0.0710  | 12.6 | 0.0049 | 0.5 | 0.04 | 31.6   | 0.2  | 69.6   | 8.5  | 1708.4 | 232.2  | 31.6 | 0.2  | NA  |
| Spot 73     | 95   | 251    | 1.6  | 4.9795  | 16.4 | 0.1017  | 22.0 | 0.0050 | 0.5 | 0.02 | 31.9   | 0.2  | 98.4   | 20.6 | 2333.7 | 381.5  | 31.9 | 0.2  | NA  |
| Spot 49     | 221  | 740    | 1.2  | 6.6589  | 9.6  | 0.0913  | 10.8 | 0.0050 | 0.6 | 0.06 | 32.3   | 0.2  | 88.7   | 9.2  | 2124.9 | 189.4  | 32.3 | 0.2  | NA  |
| Spot 87     | 104  | 365    | 1.2  | 4.7830  | 17.0 | 0.1213  | 21.6 | 0.0050 | 0.7 | 0.03 | 32.4   | 0.2  | 116.2  | 23.7 | 2601.7 | 364.4  | 32.4 | 0.2  | NA  |
| Spot 12     | 390  | 1195   | 0.7  | 8.6298  | 7.2  | 0.0730  | 9.4  | 0.0051 | 0.5 | 0.05 | 32.7   | 0.2  | 71.5   | 6.5  | 1695.9 | 174.1  | 32.7 | 0.2  | NA  |
| Spot 98     | 184  | 564    | 1.2  | 6.5000  | 11.5 | 0.0931  | 16.7 | 0.0052 | 0.5 | 0.03 | 33.4   | 0.2  | 90.4   | 14.4 | 2097.2 | 295.5  | 33.4 | 0.2  | NA  |
| Spot 72     | 1132 | 3673   | 3.4  | 14.7559 | 3.1  | 0.0462  | 4.9  | 0.0053 | 0.5 | 0.10 | 33.9   | 0.2  | 45.9   | 2.2  | 726.7  | 103.9  | 33.9 | 0.2  | NA  |
| Spot 105    | 156  | 493    | 1.2  | 5.0337  | 14.3 | 0.1264  | 17.7 | 0.0053 | 0.7 | 0.04 | 34.1   | 0.2  | 120.8  | 20.1 | 2587.5 | 297.0  | 34.1 | 0.2  | NA  |
| Spot 7      | 774  | 2195   | 1.7  | 13.9222 | 4.2  | 0.0483  | 8.5  | 0.0054 | 0.6 | 0.07 | 34.6   | 0.2  | 47.9   | 4.0  | 776.8  | 179.3  | 34.6 | 0.2  | NA  |
| Spot 32     | 476  | 1477   | 2.2  | 10.0514 | 9.2  | 0.0673  | 9.7  | 0.0054 | 0.6 | 0.06 | 34.9   | 0.2  | 66.1   | 6.2  | 1424.1 | 185.0  | 34.9 | 0.2  | NA  |
| Spot 22     | 304  | 915    | 2.1  | 8.2187  | 12.5 | 0.0798  | 14.5 | 0.0054 | 0.6 | 0.04 | 35.0   | 0.2  | 78.0   | 10.9 | 1736.9 | 266.4  | 35.0 | 0.2  | NA  |
| Spot 13     | 241  | 226    | 1.0  | 6.8607  | 9.2  | 0.0626  | 49.6 | 0.0055 | 0.5 | 0.01 | 35.2   | 0.2  | 61.7   | 29.7 | 1269.6 | 1037.1 | 35.2 | 0.2  | NA  |
| Spot 20     | 608  | 1675   | 1.9  | 11.8181 | 5.4  | 0.0574  | 11.6 | 0.0055 | 0.6 | 0.06 | 35.3   | 0.2  | 56.7   | 6.4  | 1089.9 | 232.8  | 35.3 | 0.2  | NA  |
| Spot 54     | 2961 | 10120  | 8.1  | 18.1277 | 1.7  | 0.0408  | 2.2  | 0.0055 | 0.8 | 0.36 | 35.6   | 0.3  | 40.6   | 0.9  | 347.1  | 46.9   | 35.6 | 0.3  | NA  |
| Spot 99     | 1061 | 9281   | 1.9  | 18.0664 | 2.0  | 0.0962  | 2.5  | 0.0130 | 0.6 | 0.22 | 83.3   | 0.5  | 93.2   | 2.3  | 354.5  | 55.8   | 83.3 | 0.5  | NA  |
| Spot 64     | 458  | 4822   | 2.1  | 16.2508 | 3.0  | 0.1312  | 3.8  | 0.0163 | 0.6 | 0.14 | 104.5  | 0.6  | 125.2  | 4.5  | 539.3  | 83.3   | 104  | 0.6  | NA  |
| Spot 29     | 284  | 15172  | 2.4  | 11.1449 | 2.1  | 0.2302  | 2.2  | 0.0188 | 0.5 | 0.24 | 120.2  | 0.6  | 210.3  | 4.3  | 1398.0 | 41.8   | 120  | 0.6  | NA  |
| Spot 79     | 450  | 6418   | 1.1  | 17.4598 | 6.0  | 0.1819  | 8.5  | 0.0241 | 5.5 | 0.65 | 153.3  | 8.4  | 169.7  | 13.3 | 403.9  | 145.5  | 153  | 8.4  | NA  |
| Spot 6      | 485  | 6772   | 0.9  | 17.6377 | 2.0  | 0.1825  | 3.1  | 0.0243 | 0.6 | 0.20 | 155.0  | 1.0  | 170.2  | 4.8  | 387.4  | 67.2   | 155  | 1.0  | NA  |
| Spot 114    | 229  | 3843   | 0.9  | 14.0905 | 3.8  | 0.2264  | 4.4  | 0.0245 | 0.5 | 0.12 | 155.8  | 0.8  | 207.2  | 8.3  | 840.9  | 91.4   | 156  | 0.8  | NA  |
| Spot 25     | 726  | 10972  | 1.5  | 18.3616 | 1.9  | 0.1791  | 2.3  | 0.0245 | 0.7 | 0.32 | 156.2  | 1.1  | 167.3  | 3.5  | 328.3  | 48.5   | 156  | 1.1  | NA  |
| Spot 92     | 568  | 6490   | 2.0  | 18.3423 | 1.8  | 0.1761  | 3.8  | 0.0245 | 0.9 | 0.25 | 156.3  | 1.4  | 164.7  | 5.7  | 287.9  | 83.2   | 156  | 1.4  | NA  |
| Spot 69     | 2016 | 17616  | 2.0  | 19.6391 | 1.0  | 0.1695  | 1.2  | 0.0247 | 0.6 | 0.51 | 157.0  | 0.9  | 159.0  | 1.7  | 188.7  | 23.7   | 157  | 0.9  | NA  |
| Spot 117    | 455  | 4355   | 1.5  | 16.9773 | 2.3  | 0.1894  | 4.2  | 0.0248 | 0.9 | 0.21 | 157.7  | 1.4  | 176.1  | 6.8  | 430.2  | 92.1   | 158  | 1.4  | NA  |
| Spot 34     | 527  | 1661   | 1.4  | 16.3242 | 2.7  | 0.1788  | 12.6 | 0.0248 | 0.5 | 0.04 | 157.9  | 0.8  | 167.1  | 19.5 | 299.6  | 289.1  | 158  | 0.8  | NA  |
| Spot 96     | 969  | 14246  | 1.2  | 19.0668 | 1.2  | 0.1752  | 2.0  | 0.0248 | 0.6 | 0.30 | 158.0  | 0.9  | 163.9  | 3.0  | 250.7  | 43.3   | 158  | 0.9  | NA  |
| Spot 90     | 433  | 6206   | 1.2  | 18.0250 | 1.8  | 0.1811  | 2.4  | 0.0248 | 0.6 | 0.24 | 158.1  | 0.9  | 169.0  | 3.8  | 325.1  | 53.7   | 158  | 0.9  | NA  |
| Spot 45     | 568  | 7102   | 1.2  | 17.7534 | 1.5  | 0.1857  | 3.3  | 0.0249 | 0.6 | 0.18 | 158.4  | 1.0  | 173.0  | 5.3  | 377.1  | 73.6   | 158  | 1.0  | NA  |
| Spot 101    | 848  | 10587  | 1.2  | 18.8749 | 1.4  | 0.1765  | 1.9  | 0.0249 | 0.6 | 0.29 | 158.5  | 0.9  | 165.0  | 2.9  | 260.4  | 41.6   | 158  | 0.9  | NA  |
| Spot 103    | 256  | 3950   | 1.1  | 15.6612 | 2.8  | 0.2060  | 3.4  | 0.0249 | 0.5 | 0.15 | 158.5  | 0.8  | 190.2  | 6.0  | 603.8  | 73.6   | 159  | 0.8  | NA  |
| Spot 106    | 444  | 7322   | 0.9  | 17.7427 | 2.3  | 0.1863  | 3.2  | 0.0249 | 0.6 | 0.18 | 158.6  | 0.9  | 173.5  | 5.1  | 381.1  | 70.1   | 159  | 0.9  | NA  |
| Spot 116    | 1281 | 19826  | 1.2  | 19.3437 | 1.2  | 0.1747  | 1.4  | 0.0249 | 0.6 | 0.46 | 158.6  | 1.0  | 163.5  | 2.1  | 234.5  | 28.3   | 159  | 1.0  | NA  |
| Spot 113    | 572  | 10243  | 1.7  | 17.6965 | 2.1  | 0.1889  | 2.4  | 0.0249 | 0.7 | 0.28 | 158.7  | 1.1  | 175.7  | 3.9  | 410.9  | 51.8   | 159  | 1.1  | NA  |
| Spot 1      | 1478 | 18919  | 1.9  | 19.3708 | 1.0  | 0.1745  | 1.4  | 0.0249 | 0.7 | 0.46 | 158.8  | 1.0  | 163.3  | 2.1  | 229.3  | 29.1   | 159  | 1.0  | NA  |
| Spot 89     | 2417 | 42375  | 1.5  | 19.9855 | 0.8  | 0.1702  | 1.1  | 0.0249 | 0.6 | 0.60 | 158.8  | 1.0  | 159.6  | 1.6  | 171.4  | 20.4   | 159  | 1.0  | NA  |
| Spot 53     | 725  | 11964  | 1.7  | 19.1511 | 1.5  | 0.1748  | 2.8  | 0.0250 | 0.6 | 0.21 | 159.0  | 0.9  | 163.6  | 4.3  | 230.2  | 63.7   | 159  | 0.9  | NA  |
| Spot 59     | 419  | 5528   | 1.5  | 17.1805 | 2.1  | 0.1902  | 2.9  | 0.0250 | 0.6 | 0.22 | 159.1  | 1.0  | 176.8  | 4.7  | 420.8  | 62.6   | 159  | 1.0  | NA  |
| Spot 67     | 373  | 4715   | 1.2  | 16.4193 | 2.7  | 0.1983  | 3.7  | 0.0250 | 0.5 | 0.13 | 159.1  | 0.8  | 183.7  | 6.3  | 512.9  | 81.6   | 159  | 0.8  | NA  |
| Spot 80     | 344  | 4625   | 1.3  | 16.3181 | 2.8  | 0.2000  | 4.9  | 0.0250 | 0.6 | 0.13 | 159.4  | 1.0  | 185.1  | 8.2  | 526.8  | 105.8  | 159  | 1.0  | NA  |
| Spot 31     | 1397 | 21699  | 1.7  | 19.5697 | 1.0  | 0.1739  | 1.3  | 0.0250 | 0.6 | 0.42 | 159.5  | 0.9  | 162.8  | 2.0  | 212.1  | 27.8   | 159  | 0.9  | NA  |
| Spot 39     | 678  | 9371   | 0.7  | 18.3059 | 1.7  | 0.1829  | 2    |        |     |      |        |      |        |      |        |        |      |      |     |



|          |      |        |     |         |     |         |      |        |     |      |        |      |        |      |        |       |      |      |     |
|----------|------|--------|-----|---------|-----|---------|------|--------|-----|------|--------|------|--------|------|--------|-------|------|------|-----|
| Spot 75  | 1234 | 16926  | 1.7 | 19.6395 | 1.1 | 0.1754  | 1.9  | 0.0255 | 0.7 | 0.37 | 162.2  | 1.1  | 164.1  | 2.8  | 190.5  | 40.3  | 162  | 1.1  | NA  |
| Spot 38  | 981  | 2913   | 1.7 | 17.5308 | 1.9 | 0.1824  | 5.5  | 0.0255 | 0.5 | 0.09 | 162.4  | 0.8  | 170.2  | 8.7  | 279.6  | 126.5 | 162  | 0.8  | NA  |
| Spot 109 | 2027 | 8114   | 1.0 | 19.4839 | 0.8 | 0.1739  | 1.4  | 0.0255 | 0.6 | 0.41 | 162.4  | 0.9  | 162.8  | 2.1  | 167.7  | 29.1  | 162  | 0.9  | NA  |
| Spot 11  | 630  | 11583  | 0.7 | 17.8409 | 1.9 | 0.1922  | 2.4  | 0.0255 | 0.7 | 0.28 | 162.5  | 1.1  | 178.5  | 3.9  | 397.2  | 51.2  | 162  | 1.1  | NA  |
| Spot 35  | 413  | 5895   | 1.5 | 17.2215 | 2.2 | 0.1957  | 2.7  | 0.0256 | 0.5 | 0.20 | 162.9  | 0.9  | 181.5  | 4.5  | 431.2  | 59.6  | 163  | 0.9  | NA  |
| Spot 26  | 1308 | 19246  | 1.9 | 19.1998 | 1.0 | 0.1814  | 1.6  | 0.0257 | 0.6 | 0.38 | 163.6  | 1.0  | 169.2  | 2.5  | 249.3  | 33.7  | 164  | 1.0  | NA  |
| Spot 104 | 913  | 13288  | 1.5 | 18.8516 | 1.3 | 0.1838  | 1.7  | 0.0257 | 0.6 | 0.35 | 163.7  | 1.0  | 171.4  | 2.6  | 277.7  | 36.0  | 164  | 1.0  | NA  |
| Spot 16  | 565  | 8370   | 1.1 | 17.8005 | 1.8 | 0.1926  | 2.1  | 0.0258 | 0.6 | 0.29 | 163.9  | 1.0  | 178.8  | 3.5  | 380.9  | 45.6  | 164  | 1.0  | NA  |
| Spot 119 | 952  | 14198  | 1.2 | 19.1570 | 1.1 | 0.1814  | 1.5  | 0.0258 | 0.7 | 0.47 | 164.0  | 1.1  | 169.3  | 2.3  | 244.1  | 29.8  | 164  | 1.1  | NA  |
| Spot 47  | 1062 | 15925  | 1.5 | 19.3185 | 1.0 | 0.1804  | 1.3  | 0.0258 | 0.5 | 0.37 | 164.1  | 0.8  | 168.4  | 2.1  | 228.5  | 28.9  | 164  | 0.8  | NA  |
| Spot 27  | 509  | 6921   | 1.4 | 17.6942 | 2.0 | 0.1935  | 2.6  | 0.0259 | 0.8 | 0.31 | 164.6  | 1.3  | 179.6  | 4.3  | 381.9  | 55.5  | 165  | 1.3  | NA  |
| Spot 58  | 215  | 3430   | 2.2 | 14.9337 | 4.0 | 0.2252  | 5.7  | 0.0262 | 0.6 | 0.10 | 166.7  | 1.0  | 206.2  | 10.7 | 686.1  | 121.8 | 167  | 1.0  | NA  |
| Spot 42  | 951  | 1605   | 1.2 | 16.4567 | 1.7 | 0.1875  | 15.7 | 0.0264 | 0.6 | 0.04 | 168.1  | 1.0  | 174.5  | 25.2 | 262.4  | NA    | 168  | 1.0  | NA  |
| Spot 60  | 604  | 9724   | 1.0 | 17.3692 | 1.8 | 0.2055  | 2.1  | 0.0267 | 0.5 | 0.23 | 170.1  | 0.8  | 189.7  | 3.6  | 441.1  | 44.7  | 170  | 0.8  | NA  |
| Spot 9   | 217  | 10137  | 1.6 | 16.9438 | 1.6 | 0.6134  | 2.4  | 0.0774 | 0.7 | 0.27 | 480.7  | 3.1  | 485.7  | 9.4  | 509.2  | 51.3  | 481  | 3.1  | 94  |
| Spot 41  | 172  | 14868  | 2.1 | 13.5617 | 1.0 | 1.7277  | 1.3  | 0.1727 | 0.6 | 0.43 | 1026.8 | 5.3  | 1018.9 | 8.2  | 1002.0 | 23.3  | 1002 | 23.3 | 102 |
| Spot 94  | 54   | 5337   | 1.9 | 12.9105 | 2.6 | 1.8850  | 3.0  | 0.1835 | 0.6 | 0.20 | 1086.0 | 6.2  | 1075.8 | 20.1 | 1055.3 | 59.6  | 1055 | 59.6 | 103 |
| Spot 84  | 295  | 27864  | 1.6 | 13.2589 | 0.8 | 1.8214  | 1.0  | 0.1770 | 0.6 | 0.59 | 1050.5 | 6.0  | 1053.2 | 6.9  | 1058.7 | 17.0  | 1059 | 17.0 | 99  |
| Spot 91  | 79   | 7890   | 0.7 | 12.9907 | 1.6 | 1.8885  | 2.3  | 0.1829 | 0.7 | 0.28 | 1082.8 | 6.5  | 1077.1 | 15.3 | 1065.5 | 44.4  | 1066 | 44.4 | 102 |
| Spot 14  | 586  | 15391  | 0.8 | 13.0974 | 0.6 | 1.6443  | 1.2  | 0.1587 | 0.6 | 0.49 | 949.4  | 5.2  | 987.4  | 7.6  | 1072.8 | 21.0  | 1073 | 21.0 | 89  |
| Spot 63  | 168  | 17481  | 2.1 | 13.0531 | 1.1 | 1.9534  | 1.5  | 0.1877 | 0.8 | 0.55 | 1109.2 | 8.4  | 1099.6 | 10.0 | 1080.7 | 25.0  | 1081 | 25.0 | 103 |
| Spot 74  | 299  | 34873  | 3.0 | 13.1118 | 0.6 | 1.9237  | 0.8  | 0.1845 | 0.5 | 0.62 | 1091.3 | 5.3  | 1089.4 | 5.7  | 1085.5 | 13.3  | 1086 | 13.3 | 101 |
| Spot 66  | 86   | 8755   | 2.3 | 12.6240 | 1.5 | 2.0025  | 1.9  | 0.1880 | 0.5 | 0.25 | 1110.6 | 4.9  | 1116.4 | 13.1 | 1127.6 | 37.2  | 1128 | 37.2 | 98  |
| Spot 46  | 56   | 5946   | 2.1 | 12.3395 | 2.1 | 1.9254  | 2.9  | 0.1779 | 0.5 | 0.19 | 1055.6 | 5.3  | 1089.9 | 19.6 | 1159.2 | 57.2  | 1159 | 57.2 | 91  |
| Spot 50  | 189  | 20824  | 4.5 | 12.5377 | 0.9 | 2.2223  | 1.2  | 0.2047 | 0.6 | 0.48 | 1200.5 | 6.3  | 1188.1 | 8.3  | 1165.5 | 20.6  | 1165 | 20.6 | 103 |
| Spot 86  | 169  | 18772  | 2.3 | 12.5152 | 0.8 | 2.1304  | 1.3  | 0.1959 | 0.6 | 0.46 | 1153.4 | 6.1  | 1158.7 | 8.7  | 1168.6 | 22.2  | 1169 | 22.2 | 99  |
| Spot 85  | 84   | 11927  | 1.4 | 11.3828 | 1.4 | 2.7859  | 1.8  | 0.2340 | 0.5 | 0.29 | 1355.2 | 6.3  | 1351.8 | 13.2 | 1346.2 | 32.7  | 1346 | 32.7 | 101 |
| Spot 65  | 245  | 24573  | 2.4 | 11.2620 | 0.6 | 2.8287  | 0.9  | 0.2336 | 0.5 | 0.51 | 1353.2 | 5.6  | 1363.2 | 6.7  | 1378.7 | 14.8  | 1379 | 14.8 | 98  |
| Spot 56  | 233  | 36211  | 1.9 | 10.9163 | 0.6 | 3.0982  | 0.8  | 0.2474 | 0.5 | 0.59 | 1425.1 | 6.2  | 1432.3 | 6.3  | 1442.9 | 12.7  | 1443 | 12.7 | 99  |
| Spot 10  | 292  | 47310  | 1.0 | 10.7971 | 0.6 | 3.1671  | 0.9  | 0.2493 | 0.6 | 0.66 | 1435.1 | 7.4  | 1449.2 | 6.7  | 1469.9 | 12.4  | 1470 | 12.4 | 98  |
| Spot 83  | 175  | 25858  | 0.9 | 9.6618  | 0.8 | 4.0448  | 1.1  | 0.2861 | 0.7 | 0.66 | 1621.9 | 10.5 | 1643.3 | 9.1  | 1670.7 | 15.5  | 1671 | 15.5 | 97  |
| Spot 33  | 23   | 3881   | 4.3 | 9.3290  | 2.9 | 4.4231  | 3.5  | 0.3099 | 0.6 | 0.16 | 1740.1 | 8.6  | 1716.7 | 29.2 | 1688.2 | 64.3  | 1688 | 64.3 | 103 |
| Spot 100 | 148  | 27534  | 2.1 | 9.5595  | 0.6 | 4.2393  | 0.8  | 0.2962 | 0.5 | 0.60 | 1672.6 | 7.1  | 1681.7 | 6.6  | 1692.9 | 11.9  | 1693 | 11.9 | 99  |
| Spot 55  | 370  | 73327  | 2.8 | 9.4820  | 0.7 | 4.4403  | 0.9  | 0.3072 | 0.6 | 0.68 | 1727.1 | 9.6  | 1719.9 | 7.7  | 1711.1 | 12.5  | 1711 | 12.5 | 101 |
| Spot 70  | 831  | 124227 | 4.8 | 9.1880  | 0.6 | 4.4261  | 0.9  | 0.2965 | 0.6 | 0.71 | 1674.2 | 9.4  | 1717.2 | 7.5  | 1770.2 | 11.7  | 1770 | 11.7 | 95  |
| Spot 71  | 380  | 61177  | 3.0 | 9.1536  | 0.7 | 4.7555  | 0.9  | 0.3177 | 0.7 | 0.71 | 1778.7 | 10.3 | 1777.1 | 7.8  | 1775.2 | 11.9  | 1775 | 11.9 | 100 |
| Spot 21  | 387  | 66386  | 2.9 | 9.1492  | 0.8 | 4.7590  | 1.2  | 0.3177 | 0.8 | 0.70 | 1778.4 | 12.5 | 1777.7 | 9.7  | 1776.8 | 15.1  | 1777 | 15.1 | 100 |
| Spot 95  | 272  | 32928  | 2.8 | 9.1283  | 0.7 | 4.5911  | 0.9  | 0.3063 | 0.6 | 0.65 | 1722.4 | 9.3  | 1747.6 | 7.9  | 1778.0 | 13.2  | 1778 | 13.2 | 97  |
| Spot 81  | 409  | 75252  | 3.0 | 9.1339  | 0.7 | 4.7456  | 1.0  | 0.3161 | 0.7 | 0.68 | 1770.4 | 10.4 | 1775.3 | 8.3  | 1781.1 | 13.2  | 1781 | 13.2 | 99  |
| Spot 120 | 538  | 92514  | 4.3 | 9.1443  | 0.7 | 4.7672  | 0.9  | 0.3172 | 0.7 | 0.70 | 1775.9 | 10.2 | 1779.1 | 7.9  | 1782.9 | 12.2  | 1783 | 12.2 | 100 |
| Spot 107 | 346  | 73000  | 1.4 | 9.1366  | 0.6 | 4.9342  | 0.8  | 0.3283 | 0.5 | 0.68 | 1829.9 | 8.3  | 1808.1 | 6.4  | 1783.1 | 10.2  | 1783 | 10.2 | 103 |
| Spot 115 | 382  | 20931  | 1.1 | 8.6416  | 0.7 | 5.1093  | 1.1  | 0.3226 | 0.7 | 0.65 | 1802.5 | 9.8  | 1837.7 | 9.0  | 1877.7 | 14.5  | 1878 | 14.5 | 96  |
| Spot 24  | 196  | 41847  | 1.5 | 8.2930  | 0.6 | 5.8128  | 0.9  | 0.3515 | 0.6 | 0.68 | 1941.5 | 9.7  | 1948.3 | 7.4  | 1955.5 | 11.2  | 1956 | 11.2 | 99  |
| Spot 82  | 427  | 115499 | 1.1 | 5.4106  | 0.6 | 12.9336 | 0.8  | 0.5097 | 0.6 | 0.68 | 2655.3 | 12.0 | 2674.8 | 7.6  | 2689.6 | 9.7   | 2690 | 9.7  | 99  |

## ELM18DVT-C-7

|          |      |      |     |         |      |        |       |        |     |      |      |     |      |      |        |        |      |     |    |
|----------|------|------|-----|---------|------|--------|-------|--------|-----|------|------|-----|------|------|--------|--------|------|-----|----|
| Spot 110 | 272  | 73   | 2.3 | 3.4622  | 24.8 | 0.0151 | 181.7 | 0.0011 | 0.6 | 0.00 | 7.0  | 0.0 | 15.2 | 27.4 | 1639.4 | NA     | 7.0  | 0.0 | NA |
| Spot 68  | 198  | 179  | 2.6 | 4.8514  | 17.3 | 0.0532 | 56.6  | 0.0029 | 0.5 | 0.01 | 18.8 | 0.1 | 52.6 | 29.0 | 2127.9 | 1094.6 | 18.8 | 0.1 | NA |
| Spot 114 | 97   | 241  | 4.0 | 4.6778  | 14.7 | 0.0677 | 20.3  | 0.0031 | 0.6 | 0.03 | 19.7 | 0.1 | 66.5 | 13.1 | 2463.4 | 347.5  | 19.7 | 0.1 | NA |
| Spot 39  | 348  | 177  | 3.7 | 5.9712  | 10.4 | 0.0382 | 81.8  | 0.0031 | 0.7 | 0.01 | 20.2 | 0.1 | 38.1 | 30.6 | 1386.5 | 2033.9 | 20.2 | 0.1 | NA |
| Spot 78  | 476  | 189  | 3.2 | 7.0185  | 6.8  | 0.0319 | 38.8  | 0.0035 | 0.6 | 0.01 | 22.6 | 0.1 | 31.8 | 12.2 | 801.8  | 843.2  | 22.6 | 0.1 | NA |
| Spot 88  | 849  | 235  | 2.3 | 7.8249  | 6.1  | 0.0324 | 41.4  | 0.0035 | 0.6 | 0.01 | 22.8 | 0.1 | 32.4 | 13.2 | 819.6  | 901.8  | 22.8 | 0.1 | NA |
| Spot 100 | 127  | 365  | 2.7 | 6.3011  | 16.6 | 0.0600 | 33.7  | 0.0036 | 0.6 | 0.02 | 23.0 | 0.1 | 59.2 | 19.4 | 1982.5 | 618.5  | 23.0 | 0.1 | NA |
| Spot 4   | 592  | 1326 | 2.1 | 11.3539 | 5.8  | 0.0388 | 13.8  | 0.0036 | 0.5 | 0.03 | 23.4 | 0.1 | 38.7 | 5.3  | 1132.1 | 276.5  | 23.4 | 0.1 | NA |
| Spot 20  | 697  | 506  | 2.0 | 9.8912  | 6.7  | 0.0366 | 23.4  | 0.0037 | 0.7 | 0.03 | 23.5 | 0.2 | 36.5 | 8.4  | 1004.3 | 480.1  | 23.5 | 0.2 | NA |
| Spot 62  | 378  | 892  | 2.0 | 8.0033  | 10.5 | 0.0551 | 11.5  | 0.0037 | 0.5 | 0.05 | 23.5 | 0.1 | 54.5 | 6.1  | 1787.5 | 210.9  | 23.5 | 0.1 | NA |
| Spot 103 | 275  | 678  | 2.0 | 5.5861  | 13.2 | 0.0808 | 13.5  | 0.0037 | 0.8 | 0.06 | 23.6 | 0.2 | 78.9 | 10.3 | 2454.9 | 229.7  | 23.6 | 0.2 | NA |
| Spot 18  | 550  | 1492 | 2.4 | 10.9487 | 6.1  | 0.0413 | 10.0  | 0.0037 | 0.6 | 0.06 | 23.6 | 0.1 | 41.1 | 4.0  | 1236.9 | 196.4  | 23.6 | 0.1 | NA |
| Spot 10  | 1465 | 710  | 1.6 | 12.2696 | 3.7  | 0.0309 | 14.8  | 0.0037 | 0.7 | 0.04 | 23.6 | 0.2 | 30.9 | 4.5  | 641.5  | 319.4  | 23.6 | 0.2 | NA |
| Spot 50  | 658  | 940  | 1.8 | 10.7081 | 6.2  | 0.0396 | 17.1  | 0.0037 | 0.5 | 0.03 | 23.7 | 0.1 | 39.5 | 6.6  | 1147.4 | 342.1  | 23.7 | 0.1 | NA |
| Spot 35  | 1043 | 675  | 1.8 | 11.1734 | 5.4  | 0.0346 | 25.1  | 0.0037 | 0.6 | 0.02 | 23.7 | 0.1 | 34.5 | 8.5  | 868.4  | 528.5  | 23.7 | 0.1 | NA |
| Spot 42  | 190  | 438  | 2.5 | 5.9464  | 12.5 | 0.0701 | 17.4  | 0.0037 | 0.7 | 0.04 | 23.7 | 0.2 | 68.8 | 11.6 | 2200.7 | 304.0  | 23.7 | 0.2 | NA |
| Spot 8   | 301  | 613  | 2.2 | 7.1959  | 9.8  | 0.0596 | 12.1  | 0.0037 | 0.6 | 0.05 | 23.8 | 0.1 | 58.8 | 6.9  | 1911.6 | 217.9  | 23.8 | 0.1 | NA |
| Spot 41  | 797  | 579  | 2.1 | 11.1067 | 5.8  | 0.0330 | 26.1  | 0.0037 | 0.6 | 0.02 | 23.8 | 0.1 | 33.0 | 8.5  | 769.5  | 557.8  | 23.8 | 0.1 | NA |
| Spot 23  | 804  | 1647 | 2.4 | 10.6242 | 6.6  | 0.0435 | 8.7   | 0.0037 | 0.7 | 0.08 | 23.8 | 0.2 | 43.3 | 3.7  | 1323.3 | 169.0  | 23.8 | 0.2 | NA |
| Spot 119 | 302  | 594  | 2.6 | 7.3324  | 9.9  | 0.0578 | 20.0  | 0.0037 | 0.6 | 0.03 | 23.8 | 0.1 | 57.1 | 11.1 | 1851.4 | 365.7  | 23.8 | 0.1 | NA |
| Spot 71  | 332  | 594  | 2.4 | 8.2619  | 8.6  | 0.0498 | 23.1  | 0.0037 | 0.6 | 0.02 | 23.9 | 0.1 | 49.3 | 11.1 | 1575.7 | 439.1  | 23.9 | 0.1 | NA |
| Spot 28  | 289  | 642  | 2.2 | 7.3672  | 9.9  | 0.0585 | 17.3  | 0.0037 | 0.6 | 0.03 | 23.9 | 0.1 | 57.7 | 9.7  | 1870.4 | 314.3  | 23.9 | 0.1 | NA |
| Spot 80  | 603  | 1407 | 2.4 | 11.7492 | 6.7  | 0.0383 | 8.5   | 0.0037 | 0.6 | 0.07 | 23.9 | 0.1 | 38.2 | 3.2  | 1062.0 | 171.0  | 23.9 | 0.1 | NA |
| Spot 60  | 308  | 653  | 1.8 | 8.8573  | 11.3 | 0.0469 | 23.3  | 0.0037 | 0.6 | 0.02 | 24.0 | 0.1 | 46.5 | 10.6 | 1450.6 | 448.8  | 24.0 | 0.1 | NA |
| Spot 59  | 671  | 1584 | 2.3 | 11.1884 | 6.0  | 0.0413 | 6.5   | 0.0037 | 0.6 | 0.09 | 24.0 | 0.1 | 41.1 | 2.6  | 1200.5 | 127.3  | 24.0 | 0.1 | NA |
| Spot 61  | 488  | 1251 | 2.6 | 7.5233  | 6.5  | 0.0629 | 7.7   | 0.0037 | 0.7 | 0.10 | 24.1 | 0.2 | 62.0 | 4.6  | 1982.4 | 136.0  | 24.1 | 0.2 | NA |
| Spot 79  | 1069 | 2162 | 1.8 | 13.5698 | 4.3  | 0.0346 | 7.6   | 0.0038 | 0.5 | 0.07 | 24.1 | 0.1 | 34.5 | 2.6  | 832.6  | 158.9  | 24.1 | 0.1 | NA |
| Spot 113 | 391  | 976  | 3.0 | 7.7989  | 8.2  | 0.0589 | 13.6  | 0.0038 | 0.9 | 0.06 | 24.1 | 0.2 | 58.2 | 7.7  | 1863.2 | 246.6  | 24.1 | 0.2 | NA |
| Spot 14  | 949  | 808  | 1.7 | 11.8408 | 4.9  | 0.0344 | 17.7  | 0.0038 | 0.5 | 0.03 | 24.2 | 0.1 | 34.3 | 6.0  | 820.6  | 371.8  | 24.2 | 0.1 | NA |
| Spot 31  | 387  | 993  | 1.8 | 7.8778  | 8.5  | 0.0585 | 11.1  | 0.0038 | 0.7 | 0.06 | 24.2 | 0.2 | 57.8 | 6.2  | 1847.7 | 200.4  | 24.2 | 0.2 | NA |
| Spot 81  | 756  | 1597 | 2.0 | 10.8429 | 5.5  | 0.0431 | 8.5   | 0.0038 | 0.5 | 0.06 | 24.2 | 0.1 | 42.8 | 3.6  | 1272.9 | 166.6  | 24.2 | 0.1 | NA |
| Spot 51  | 344  | 798  | 2.2 | 7.5082  | 9.7  | 0.0601 | 14.6  | 0.0038 | 0.6 | 0.04 | 24.2 | 0.1 | 59.3 | 8.4  | 1893.9 | 264.5  | 24.2 | 0.1 | NA |
| Spot 26  | 324  | 834  | 2.5 | 7.1917  | 12.5 | 0.0639 | 17.7  | 0.0038 | 0.5 | 0.03 | 24.3 | 0.1 | 62.9 | 10.8 | 1995.9 | 316.5  | 24.3 | 0.1 | NA |
| Spot 96  | 437  | 1165 | 1.9 | 9.0017  | 9.4  | 0.0515 | 12.5  | 0.0038 | 0.6 | 0.05 | 24.3 | 0.1 | 51.0 | 6.2  | 1605.3 | 233.5  | 24.3 | 0.1 | NA |
| Spot 92  | 692  | 1470 | 2.8 | 11.3083 | 7.3  | 0.0410 | 12.7  | 0.0038 | 0.6 | 0.05 | 24.3 | 0.1 | 40.8 | 5.1  | 1162.5 | 251.5  | 24.3 | 0.1 | NA |
| Spot 95  | 1789 | 4701 | 2.5 | 15.7660 | 3.8  | 0.0314 | 5.7   | 0.0038 | 0.7 | 0.12 | 24.3 | 0.2 | 31.4 | 1.8  | 610.3  | 122.9  | 24.3 | 0.2 | NA |
| Spot 83  | 367  | 867  | 2.3 | 7.5231  | 9.2  | 0.0611 | 12.4  | 0.0038 | 0.5 | 0.04 | 24.3 | 0.1 | 60.2 | 7.2  | 1912.2 | 222.6  | 24.3 | 0.1 | NA |
| Spot 101 | 430  | 1109 | 3.0 | 9.8080  | 7.3  | 0.0465 | 9.5   | 0.0038 | 0.5 | 0.05 | 24.4 | 0.1 | 46.2 | 4.3  | 1407.9 | 182.5  | 24.4 | 0.1 | NA |
| Spot 3   | 617  | 1498 | 1.9 | 10.5430 | 6.2  | 0.0447 | 7.5   | 0.0038 | 0.6 | 0.08 | 24.4 | 0.1 | 44.4 | 3.3  | 1327.8 | 144.6  | 24.4 | 0.1 | NA |
| Spot 33  | 1953 | 3626 | 2.6 | 16.1400 | 2.7  | 0.0302 | 6.9   | 0.0038 | 0.7 | 0.11 | 24.4 | 0.2 | 30.2 | 2.1  | 521.3  | 151.8  | 24.4 | 0.2 | NA |
| Spot 16  | 715  | 1877 | 2.2 | 12.5899 | 6.4  | 0.0375 | 11.3  | 0.0038 | 0.6 | 0.05 | 24.4 | 0.1 | 37.3 | 4.2  | 975.1  | 231.6  | 24.4 | 0.1 | NA |
| Spot 70  | 878  | 1872 | 1.8 | 12.6806 | 4.6  | 0.0372 | 8.7   | 0.0038 | 0.5 | 0.06 | 24.5 | 0.1 | 37.1 | 3.2  | 957.1  | 178.5  | 24.5 | 0.1 | NA |
| Spot 98  | 708  | 1492 | 2.5 | 10.6977 | 6.3  | 0.0440 | 11.5  | 0.0038 | 0.5 | 0.05 | 24.5 | 0.1 | 43.7 | 4.9  | 1288.6 | 224.6  | 24.5 | 0.1 | NA |
| Spot 44  | 665  | 1604 | 1.9 | 11.0204 | 6.2  | 0.0429 | 9.1   | 0.0038 | 0.5 | 0.05 | 24.5 | 0.1 | 42.6 | 3.8  | 1237.5 | 177.8  | 24.5 | 0.1 | NA |
| Spot 87  | 546  | 1227 | 2.1 | 10.8317 | 6.6  | 0.0423 | 12.6  | 0.0038 | 0.5 | 0.04 | 24.5 | 0.1 | 42.1 | 5.2  | 1211.6 | 249.3  | 24.5 | 0.1 | NA |
| Spot 72  | 907  | 2269 | 2.1 | 13.3535 | 4.4  | 0.0359 | 9.7   | 0.0038 | 0.9 | 0.09 | 24.5 | 0.2 | 35.8 | 3.4  | 878.9  | 199.4  | 24.5 | 0.2 | NA |
| Spot 17  | 1560 | 2174 | 2.0 | 14.6009 | 2.9  | 0.0324 | 4.9   | 0.0038 | 0.6 | 0.12 | 24.5 | 0.1 | 32.4 | 1.6  | 662.4  | 103.5  | 24.5 | 0.1 | NA |
| Spot 37  | 2020 | 2992 | 2.5 | 16.5680 | 2.9  | 0.0291 | 4.7   | 0.0038 | 0.6 | 0.12 | 24.5 | 0.1 | 29.1 | 1.4  | 424.9  | 104.9  | 24.5 | 0.1 | NA |
| Spot 69  | 1044 | 2681 | 2.1 | 12.8559 | 3.8  | 0.0380 | 7.6   | 0.0038 | 0.6 | 0.07 | 24.6 | 0.1 | 37.9 | 2.8  | 992.4  | 154.5  | 24.6 | 0.1 | NA |

|          |      |       |     |         |      |        |      |        |     |      |      |     |      |      |        |       |      |     |    |
|----------|------|-------|-----|---------|------|--------|------|--------|-----|------|------|-----|------|------|--------|-------|------|-----|----|
| Spot 75  | 1337 | 3036  | 1.0 | 15.1117 | 4.0  | 0.0322 | 6.6  | 0.0038 | 0.5 | 0.08 | 24.6 | 0.1 | 32.2 | 2.1  | 646.5  | 142.4 | 24.6 | 0.1 | NA |
| Spot 22  | 483  | 1100  | 1.9 | 8.4823  | 7.6  | 0.0554 | 9.2  | 0.0038 | 0.6 | 0.06 | 24.6 | 0.1 | 54.8 | 4.9  | 1717.3 | 169.2 | 24.6 | 0.1 | NA |
| Spot 117 | 472  | 972   | 2.8 | 9.5545  | 7.9  | 0.0474 | 10.3 | 0.0038 | 0.6 | 0.06 | 24.6 | 0.2 | 47.0 | 4.7  | 1423.5 | 197.0 | 24.6 | 0.2 | NA |
| Spot 66  | 867  | 2256  | 2.9 | 12.8906 | 3.8  | 0.0375 | 5.1  | 0.0038 | 0.5 | 0.09 | 24.6 | 0.1 | 37.3 | 1.9  | 957.0  | 104.2 | 24.6 | 0.1 | NA |
| Spot 24  | 656  | 1478  | 2.1 | 11.1879 | 6.5  | 0.0420 | 7.3  | 0.0038 | 0.6 | 0.08 | 24.6 | 0.1 | 41.8 | 3.0  | 1186.8 | 143.8 | 24.6 | 0.1 | NA |
| Spot 47  | 232  | 544   | 1.6 | 6.4642  | 11.5 | 0.0686 | 16.4 | 0.0038 | 0.6 | 0.04 | 24.6 | 0.2 | 67.4 | 10.7 | 2097.1 | 290.7 | 24.6 | 0.2 | NA |
| Spot 102 | 399  | 943   | 2.0 | 8.4164  | 9.1  | 0.0550 | 10.3 | 0.0038 | 0.7 | 0.07 | 24.7 | 0.2 | 54.4 | 5.5  | 1698.2 | 190.7 | 24.7 | 0.2 | NA |
| Spot 30  | 733  | 1779  | 3.3 | 11.7641 | 5.5  | 0.0406 | 7.8  | 0.0038 | 0.6 | 0.08 | 24.7 | 0.2 | 40.4 | 3.1  | 1115.7 | 154.7 | 24.7 | 0.2 | NA |
| Spot 2   | 955  | 2051  | 2.0 | 13.4391 | 5.1  | 0.0356 | 5.5  | 0.0038 | 0.7 | 0.12 | 24.7 | 0.2 | 35.5 | 1.9  | 848.6  | 113.6 | 24.7 | 0.2 | NA |
| Spot 93  | 882  | 2176  | 3.5 | 11.8253 | 5.4  | 0.0412 | 6.0  | 0.0038 | 0.6 | 0.10 | 24.7 | 0.2 | 41.0 | 2.4  | 1142.8 | 119.7 | 24.7 | 0.2 | NA |
| Spot 90  | 925  | 1688  | 1.8 | 13.1341 | 4.1  | 0.0357 | 10.7 | 0.0038 | 0.4 | 0.04 | 24.7 | 0.1 | 35.6 | 3.7  | 852.2  | 222.5 | 24.7 | 0.1 | NA |
| Spot 74  | 1239 | 2950  | 2.1 | 15.0253 | 3.6  | 0.0325 | 5.8  | 0.0038 | 0.6 | 0.10 | 24.7 | 0.1 | 32.5 | 1.9  | 655.0  | 123.8 | 24.7 | 0.1 | NA |
| Spot 67  | 637  | 1540  | 1.9 | 10.7497 | 6.4  | 0.0443 | 12.4 | 0.0038 | 0.5 | 0.04 | 24.7 | 0.1 | 44.0 | 5.4  | 1283.2 | 243.0 | 24.7 | 0.1 | NA |
| Spot 106 | 1010 | 2514  | 2.2 | 14.3546 | 4.3  | 0.0338 | 6.5  | 0.0038 | 0.6 | 0.09 | 24.7 | 0.1 | 33.7 | 2.1  | 732.7  | 136.3 | 24.7 | 0.1 | NA |
| Spot 82  | 366  | 860   | 2.9 | 8.3031  | 10.9 | 0.0552 | 18.1 | 0.0038 | 0.6 | 0.03 | 24.7 | 0.1 | 54.6 | 9.6  | 1700.0 | 335.2 | 24.7 | 0.1 | NA |
| Spot 7   | 360  | 802   | 2.4 | 7.8619  | 7.6  | 0.0585 | 12.2 | 0.0038 | 0.6 | 0.05 | 24.7 | 0.1 | 57.7 | 6.9  | 1804.9 | 223.1 | 24.7 | 0.1 | NA |
| Spot 63  | 1060 | 1164  | 2.1 | 13.1433 | 4.8  | 0.0336 | 7.3  | 0.0038 | 0.6 | 0.08 | 24.7 | 0.1 | 33.6 | 2.4  | 723.1  | 155.6 | 24.7 | 0.1 | NA |
| Spot 105 | 587  | 1568  | 1.9 | 10.3861 | 6.3  | 0.0462 | 11.7 | 0.0038 | 0.6 | 0.05 | 24.7 | 0.2 | 45.8 | 5.3  | 1362.5 | 226.2 | 24.7 | 0.2 | NA |
| Spot 27  | 905  | 949   | 2.8 | 10.8315 | 4.7  | 0.0409 | 12.8 | 0.0038 | 0.7 | 0.06 | 24.7 | 0.2 | 40.7 | 5.1  | 1125.1 | 256.4 | 24.7 | 0.2 | NA |
| Spot 5   | 470  | 1102  | 2.0 | 9.3354  | 6.5  | 0.0502 | 9.5  | 0.0038 | 0.6 | 0.06 | 24.7 | 0.1 | 49.7 | 4.6  | 1520.1 | 179.7 | 24.7 | 0.1 | NA |
| Spot 64  | 452  | 1151  | 2.2 | 9.4929  | 8.1  | 0.0493 | 10.7 | 0.0038 | 0.6 | 0.05 | 24.8 | 0.1 | 48.9 | 5.1  | 1486.6 | 203.5 | 24.8 | 0.1 | NA |
| Spot 38  | 1388 | 3488  | 2.7 | 15.7741 | 3.4  | 0.0314 | 6.4  | 0.0039 | 0.6 | 0.09 | 24.8 | 0.1 | 31.3 | 2.0  | 568.6  | 138.9 | 24.8 | 0.1 | NA |
| Spot 49  | 1475 | 2845  | 1.6 | 14.1988 | 3.6  | 0.0346 | 8.3  | 0.0039 | 0.5 | 0.06 | 24.8 | 0.1 | 34.5 | 2.8  | 779.0  | 174.6 | 24.8 | 0.1 | NA |
| Spot 54  | 988  | 2440  | 2.0 | 12.3439 | 4.6  | 0.0398 | 7.1  | 0.0039 | 0.5 | 0.08 | 24.8 | 0.1 | 39.6 | 2.8  | 1065.4 | 142.8 | 24.8 | 0.1 | NA |
| Spot 112 | 707  | 1632  | 1.6 | 10.5517 | 6.6  | 0.0456 | 7.4  | 0.0039 | 0.7 | 0.09 | 24.8 | 0.2 | 45.3 | 3.3  | 1334.7 | 142.8 | 24.8 | 0.2 | NA |
| Spot 55  | 876  | 2093  | 2.8 | 13.5844 | 4.4  | 0.0354 | 7.3  | 0.0039 | 0.7 | 0.09 | 24.8 | 0.2 | 35.3 | 2.5  | 822.0  | 151.8 | 24.8 | 0.2 | NA |
| Spot 32  | 1164 | 2723  | 2.1 | 14.0298 | 4.1  | 0.0350 | 7.5  | 0.0039 | 0.6 | 0.08 | 24.8 | 0.2 | 34.9 | 2.6  | 799.6  | 156.1 | 24.8 | 0.2 | NA |
| Spot 97  | 679  | 1570  | 1.3 | 11.7085 | 6.0  | 0.0405 | 9.0  | 0.0039 | 0.6 | 0.07 | 24.8 | 0.2 | 40.3 | 3.6  | 1099.2 | 180.1 | 24.8 | 0.2 | NA |
| Spot 109 | 552  | 1290  | 1.5 | 10.3842 | 6.1  | 0.0453 | 10.7 | 0.0039 | 0.6 | 0.06 | 24.8 | 0.2 | 45.0 | 4.7  | 1318.5 | 207.6 | 24.8 | 0.2 | NA |
| Spot 108 | 451  | 1186  | 2.3 | 9.5749  | 8.7  | 0.0493 | 15.1 | 0.0039 | 0.6 | 0.04 | 24.9 | 0.2 | 48.9 | 7.2  | 1476.6 | 288.7 | 24.9 | 0.2 | NA |
| Spot 19  | 892  | 2423  | 2.3 | 13.2581 | 4.3  | 0.0370 | 5.4  | 0.0039 | 0.5 | 0.09 | 24.9 | 0.1 | 36.9 | 2.0  | 908.2  | 111.6 | 24.9 | 0.1 | NA |
| Spot 76  | 532  | 1414  | 2.0 | 11.3104 | 6.5  | 0.0418 | 8.9  | 0.0039 | 0.6 | 0.07 | 25.0 | 0.2 | 41.6 | 3.6  | 1150.4 | 176.0 | 25.0 | 0.2 | NA |
| Spot 89  | 977  | 2637  | 2.1 | 13.0002 | 4.2  | 0.0382 | 8.0  | 0.0039 | 0.6 | 0.08 | 25.0 | 0.2 | 38.1 | 3.0  | 967.2  | 162.6 | 25.0 | 0.2 | NA |
| Spot 34  | 717  | 1546  | 2.4 | 10.6608 | 6.4  | 0.0453 | 8.2  | 0.0039 | 0.7 | 0.09 | 25.0 | 0.2 | 45.0 | 3.6  | 1303.1 | 158.0 | 25.0 | 0.2 | NA |
| Spot 12  | 3292 | 6884  | 2.9 | 18.2462 | 1.8  | 0.0282 | 2.9  | 0.0039 | 0.6 | 0.20 | 25.0 | 0.1 | 28.2 | 0.8  | 308.0  | 64.1  | 25.0 | 0.1 | NA |
| Spot 111 | 411  | 1087  | 2.8 | 8.2810  | 10.4 | 0.0579 | 12.3 | 0.0039 | 0.6 | 0.05 | 25.0 | 0.2 | 57.1 | 6.8  | 1762.6 | 225.1 | 25.0 | 0.2 | NA |
| Spot 57  | 817  | 322   | 1.8 | 9.7330  | 5.6  | 0.0308 | 73.2 | 0.0039 | 0.6 | 0.01 | 25.1 | 0.2 | 30.8 | 22.2 | 501.8  | NA    | 25.1 | 0.2 | NA |
| Spot 15  | 769  | 1883  | 2.6 | 11.8055 | 4.8  | 0.0413 | 8.4  | 0.0039 | 0.6 | 0.07 | 25.1 | 0.1 | 41.1 | 3.4  | 1120.2 | 168.2 | 25.1 | 0.1 | NA |
| Spot 85  | 1019 | 2414  | 1.6 | 13.3071 | 4.0  | 0.0371 | 5.3  | 0.0039 | 0.7 | 0.12 | 25.1 | 0.2 | 37.0 | 1.9  | 899.6  | 109.5 | 25.1 | 0.2 | NA |
| Spot 6   | 734  | 1553  | 1.8 | 11.5855 | 5.6  | 0.0415 | 11.9 | 0.0039 | 0.6 | 0.05 | 25.1 | 0.1 | 41.3 | 4.8  | 1127.1 | 237.3 | 25.1 | 0.1 | NA |
| Spot 84  | 728  | 1781  | 2.2 | 12.1697 | 5.6  | 0.0398 | 6.6  | 0.0039 | 0.6 | 0.09 | 25.1 | 0.1 | 39.6 | 2.6  | 1040.9 | 133.3 | 25.1 | 0.1 | NA |
| Spot 21  | 1853 | 4086  | 2.1 | 15.8493 | 3.0  | 0.0319 | 3.5  | 0.0039 | 0.5 | 0.16 | 25.1 | 0.1 | 31.9 | 1.1  | 581.0  | 74.5  | 25.1 | 0.1 | NA |
| Spot 118 | 477  | 1171  | 1.9 | 9.9975  | 7.8  | 0.0472 | 9.2  | 0.0039 | 0.8 | 0.09 | 25.1 | 0.2 | 46.8 | 4.2  | 1375.5 | 177.1 | 25.1 | 0.2 | NA |
| Spot 13  | 748  | 1773  | 2.6 | 12.0471 | 6.0  | 0.0402 | 11.1 | 0.0039 | 0.6 | 0.06 | 25.1 | 0.2 | 40.1 | 4.3  | 1062.5 | 222.8 | 25.1 | 0.2 | NA |
| Spot 56  | 1388 | 3273  | 1.7 | 14.8150 | 3.7  | 0.0339 | 4.9  | 0.0039 | 0.6 | 0.12 | 25.2 | 0.1 | 33.9 | 1.6  | 703.4  | 102.7 | 25.2 | 0.1 | NA |
| Spot 65  | 437  | 1121  | 2.3 | 9.2881  | 6.9  | 0.0512 | 9.0  | 0.0039 | 0.8 | 0.09 | 25.2 | 0.2 | 50.7 | 4.5  | 1527.3 | 169.2 | 25.2 | 0.2 | NA |
| Spot 94  | 908  | 2307  | 2.5 | 12.6823 | 5.3  | 0.0391 | 7.2  | 0.0039 | 0.5 | 0.07 | 25.2 | 0.1 | 39.0 | 2.8  | 999.2  | 146.6 | 25.2 | 0.1 | NA |
| Spot 99  | 3278 | 7669  | 2.4 | 17.8717 | 2.0  | 0.0291 | 2.9  | 0.0039 | 0.7 | 0.24 | 25.2 | 0.2 | 29.2 | 0.8  | 368.7  | 64.0  | 25.2 | 0.2 | NA |
| Spot 77  | 846  | 2446  | 2.5 | 13.5601 | 4.6  | 0.0365 | 5.7  | 0.0039 | 0.6 | 0.10 | 25.2 | 0.1 | 36.4 | 2.0  | 858.0  | 117.4 | 25.2 | 0.1 | NA |
| Spot 45  | 435  | 1084  | 3.6 | 8.4651  | 9.0  | 0.0568 | 10.1 | 0.0039 | 0.5 | 0.05 | 25.2 | 0.1 | 56.1 | 5.5  | 1716.7 | 185.6 | 25.2 | 0.1 | NA |
| Spot 9   | 673  | 1084  | 1.7 | 11.7300 | 5.1  | 0.0390 | 12.3 | 0.0039 | 0.7 | 0.06 | 25.2 | 0.2 | 38.8 | 4.7  | 988.0  | 250.2 | 25.2 | 0.2 | NA |
| Spot 120 | 344  | 854   | 2.2 | 8.0648  | 10.8 | 0.0583 | 14.2 | 0.0039 | 0.6 | 0.04 | 25.3 | 0.1 | 57.6 | 8.0  | 1759.7 | 261.6 | 25.3 | 0.1 | NA |
| Spot 107 | 895  | 1930  | 3.2 | 12.6436 | 5.4  | 0.0387 | 7.0  | 0.0039 | 0.5 | 0.07 | 25.3 | 0.1 | 38.6 | 2.7  | 970.9  | 142.9 | 25.3 | 0.1 | NA |
| Spot 91  | 1631 | 3087  | 2.2 | 16.0057 | 2.7  | 0.0312 | 4.2  | 0.0039 | 0.7 | 0.17 | 25.3 | 0.2 | 31.2 | 1.3  | 515.9  | 90.4  | 25.3 | 0.2 | NA |
| Spot 86  | 673  | 2028  | 1.6 | 10.8746 | 5.2  | 0.0460 | 6.2  | 0.0039 | 0.7 | 0.11 | 25.3 | 0.2 | 45.7 | 2.8  | 1311.3 | 119.5 | 25.3 | 0.2 | NA |
| Spot 11  | 581  | 1477  | 3.1 | 10.8894 | 5.9  | 0.0445 | 7.5  | 0.0039 | 0.6 | 0.08 | 25.3 | 0.1 | 44.2 | 3.2  | 1247.0 | 146.0 | 25.3 | 0.1 | NA |
| Spot 115 | 447  | 1164  | 2.2 | 11.9196 | 6.6  | 0.0388 | 10.8 | 0.0039 | 0.5 | 0.05 | 25.4 | 0.1 | 38.6 | 4.1  | 965.8  | 221.1 | 25.4 | 0.1 | NA |
| Spot 52  | 1357 | 3107  | 2.2 | 15.2889 | 2.7  | 0.0330 | 3.5  | 0.0039 | 0.5 | 0.14 | 25.4 | 0.1 | 32.9 | 1.1  | 622.4  | 75.1  | 25.4 | 0.1 | NA |
| Spot 1   | 4668 | 12840 | 2.3 | 19.3322 | 1.2  | 0.0275 | 1.9  | 0.0039 | 0.5 | 0.26 | 25.4 | 0.1 | 27.6 | 0.5  | 220.4  | 41.4  | 25.4 | 0.1 | NA |
| Spot 43  | 374  | 204   | 2.5 | 6.4529  | 9.7  | 0.0468 | 17.4 | 0.0040 | 0.6 | 0.03 | 25.5 | 0.1 | 46.5 | 7.9  | 1329.7 | 338.3 | 25.5 | 0.1 | NA |
| Spot 36  | 1488 | 3193  | 1.0 | 14.3532 | 3.6  | 0.0355 | 5.3  | 0.0040 | 0.5 | 0.09 | 25.5 | 0.1 | 35.5 | 1.9  | 773.2  | 111.7 | 25.5 | 0.1 | NA |
| Spot 104 | 2535 | 6729  | 3.4 | 17.4284 | 2.6  | 0.0302 | 4.4  | 0.0040 | 0.6 | 0.14 | 25.6 | 0.2 | 30.2 | 1.3  | 414.2  | 98.1  | 25.6 | 0.2 | NA |
| Spot 48  | 504  | 447   | 1.9 | 9.1400  | 7.3  | 0.0429 | 21.1 | 0.0040 | 0.6 | 0.03 | 25.9 | 0.2 | 42.6 | 8.8  | 1130.1 | 424.0 | 25.9 | 0.2 | NA |
| Spot 46  | 868  | 1223  | 1.3 | 12.2821 | 4.9  | 0.0393 | 17.5 | 0.0041 | 0.6 | 0.03 | 26.4 | 0.2 | 39.1 | 6.7  | 911.8  | 361.9 | 26.4 | 0.2 | NA |
| Spot 40  | 795  | 2240  | 2.0 | 12.1983 | 5.3  | 0.0445 | 7.3  | 0.0043 | 0.5 | 0.07 | 27.6 | 0.1 | 44.2 | 3.1  | 1078.4 | 145.8 | 27.6 | 0.1 | NA |
| Spot 58  | 1874 | 6006  | 2.0 | 17.4042 | 2.2  | 0.0328 | 4.6  | 0.0043 | 0.8 | 0.17 | 27.9 | 0.2 | 32.8 | 1.5  | 404.7  | 100.8 | 27.9 | 0.2 | NA |
| Spot 116 | 156  | 214   | 2.0 | 4.6234  | 13.7 | 0.1025 | 30.0 | 0.0048 | 0.5 | 0.02 | 30.6 | 0.2 | 99.1 | 28.3 | 2415.3 | 52    |      |     |    |

|          |      |       |     |         |     |        |     |        |     |      |       |     |       |      |        |       |     |     |    |
|----------|------|-------|-----|---------|-----|--------|-----|--------|-----|------|-------|-----|-------|------|--------|-------|-----|-----|----|
| Spot 74  | 167  | 4764  | 1.3 | 16.6087 | 2.5 | 0.1988 | 4.5 | 0.0253 | 0.5 | 0.12 | 161.4 | 0.8 | 184.1 | 7.6  | 487.5  | 98.9  | 161 | 0.8 | NA |
| Spot 133 | 584  | 19577 | 1.7 | 19.1722 | 1.1 | 0.1789 | 1.4 | 0.0254 | 0.5 | 0.38 | 161.4 | 0.9 | 167.1 | 2.2  | 248.7  | 29.8  | 161 | 0.9 | NA |
| Spot 16  | 453  | 13755 | 2.1 | 18.8605 | 1.4 | 0.1818 | 2.0 | 0.0254 | 0.5 | 0.28 | 161.6 | 0.9 | 169.6 | 3.1  | 283.4  | 43.1  | 162 | 0.9 | NA |
| Spot 13  | 302  | 7824  | 2.0 | 17.8460 | 1.8 | 0.1900 | 2.8 | 0.0254 | 0.7 | 0.26 | 162.0 | 1.2 | 176.7 | 4.6  | 377.9  | 61.6  | 162 | 1.2 | NA |
| Spot 21  | 543  | 15527 | 0.6 | 19.1583 | 1.2 | 0.1799 | 1.3 | 0.0255 | 0.5 | 0.39 | 162.1 | 0.8 | 168.0 | 2.1  | 252.2  | 28.1  | 162 | 0.8 | NA |
| Spot 140 | 200  | 4670  | 1.6 | 16.8077 | 2.7 | 0.1977 | 4.7 | 0.0256 | 0.6 | 0.12 | 162.8 | 0.9 | 183.2 | 7.9  | 455.4  | 103.2 | 163 | 0.9 | NA |
| Spot 116 | 135  | 4065  | 1.7 | 15.7169 | 2.7 | 0.2116 | 3.9 | 0.0256 | 0.6 | 0.16 | 162.8 | 1.0 | 194.9 | 6.8  | 603.9  | 82.4  | 163 | 1.0 | NA |
| Spot 75  | 584  | 11913 | 1.1 | 19.2189 | 1.1 | 0.1784 | 1.9 | 0.0256 | 0.5 | 0.27 | 162.9 | 0.8 | 166.7 | 2.9  | 221.6  | 42.5  | 163 | 0.8 | NA |
| Spot 82  | 374  | 11430 | 2.6 | 18.2325 | 1.5 | 0.1881 | 2.9 | 0.0256 | 0.6 | 0.21 | 162.9 | 1.0 | 175.0 | 4.6  | 341.7  | 63.8  | 163 | 1.0 | NA |
| Spot 44  | 201  | 4721  | 1.4 | 16.5304 | 2.7 | 0.2021 | 5.2 | 0.0256 | 0.4 | 0.09 | 163.0 | 0.7 | 186.9 | 8.9  | 500.6  | 114.0 | 163 | 0.7 | NA |
| Spot 79  | 163  | 4077  | 1.3 | 15.7745 | 3.2 | 0.2104 | 3.8 | 0.0256 | 0.7 | 0.17 | 163.0 | 1.1 | 193.9 | 6.7  | 588.2  | 81.2  | 163 | 1.1 | NA |
| Spot 111 | 76   | 1999  | 2.0 | 12.0122 | 4.4 | 0.2690 | 7.0 | 0.0256 | 0.6 | 0.09 | 163.0 | 1.0 | 241.9 | 15.1 | 1099.5 | 140.0 | 163 | 1.0 | NA |
| Spot 141 | 278  | 7157  | 2.2 | 18.5736 | 1.9 | 0.1822 | 2.2 | 0.0256 | 0.5 | 0.24 | 163.2 | 0.9 | 169.9 | 3.5  | 264.7  | 50.1  | 163 | 0.9 | NA |
| Spot 87  | 341  | 6414  | 2.0 | 17.9123 | 1.6 | 0.1885 | 4.4 | 0.0256 | 0.6 | 0.13 | 163.3 | 0.9 | 175.3 | 7.2  | 341.2  | 100.0 | 163 | 0.9 | NA |
| Spot 36  | 377  | 10090 | 1.8 | 19.0352 | 1.4 | 0.1808 | 1.8 | 0.0257 | 0.6 | 0.35 | 163.5 | 1.0 | 168.8 | 2.8  | 243.1  | 38.8  | 164 | 1.0 | NA |
| Spot 23  | 135  | 1301  | 2.4 | 13.4499 | 3.2 | 0.2241 | 6.6 | 0.0257 | 0.6 | 0.09 | 163.7 | 1.0 | 205.3 | 12.3 | 714.9  | 140.1 | 164 | 1.0 | NA |
| Spot 31  | 391  | 10669 | 2.0 | 18.3686 | 1.4 | 0.1883 | 1.8 | 0.0257 | 0.5 | 0.28 | 163.8 | 0.8 | 175.1 | 3.0  | 331.2  | 40.0  | 164 | 0.8 | NA |
| Spot 86  | 538  | 14324 | 1.8 | 18.8723 | 1.3 | 0.1838 | 1.7 | 0.0258 | 0.9 | 0.50 | 164.0 | 1.4 | 171.3 | 2.7  | 273.1  | 33.7  | 164 | 1.4 | NA |
| Spot 84  | 364  | 8735  | 2.3 | 18.6097 | 1.7 | 0.1846 | 2.5 | 0.0258 | 0.7 | 0.29 | 164.4 | 1.2 | 172.0 | 4.0  | 277.2  | 55.7  | 164 | 1.2 | NA |
| Spot 119 | 551  | 13593 | 2.9 | 19.2839 | 1.0 | 0.1804 | 2.1 | 0.0259 | 0.5 | 0.22 | 164.6 | 0.8 | 168.4 | 3.2  | 223.3  | 46.4  | 165 | 0.8 | NA |
| Spot 132 | 661  | 18436 | 1.5 | 19.2577 | 1.2 | 0.1818 | 1.5 | 0.0259 | 0.6 | 0.39 | 164.8 | 1.0 | 169.6 | 2.3  | 237.2  | 31.9  | 165 | 1.0 | NA |
| Spot 7   | 322  | 9532  | 1.6 | 18.6750 | 1.4 | 0.1859 | 2.5 | 0.0260 | 0.5 | 0.19 | 165.2 | 0.8 | 173.2 | 4.0  | 283.0  | 57.0  | 165 | 0.8 | NA |
| Spot 72  | 531  | 4188  | 1.4 | 17.9670 | 1.4 | 0.1858 | 5.7 | 0.0260 | 0.6 | 0.11 | 165.2 | 1.0 | 173.1 | 9.0  | 281.7  | 129.4 | 165 | 1.0 | NA |
| Spot 34  | 513  | 12484 | 1.6 | 18.7704 | 1.3 | 0.1865 | 2.6 | 0.0260 | 0.7 | 0.25 | 165.3 | 1.1 | 173.6 | 4.2  | 288.5  | 58.3  | 165 | 1.1 | NA |
| Spot 129 | 329  | 9639  | 2.0 | 17.7589 | 1.8 | 0.1955 | 2.2 | 0.0260 | 0.5 | 0.24 | 165.4 | 0.9 | 181.3 | 3.6  | 394.5  | 47.6  | 165 | 0.9 | NA |
| Spot 91  | 504  | 14891 | 1.9 | 18.9823 | 1.1 | 0.1849 | 1.5 | 0.0260 | 0.6 | 0.41 | 165.6 | 1.0 | 172.2 | 2.3  | 264.7  | 30.8  | 166 | 1.0 | NA |
| Spot 77  | 266  | 7678  | 1.2 | 17.8734 | 2.0 | 0.1943 | 2.5 | 0.0262 | 0.5 | 0.21 | 166.6 | 0.9 | 180.3 | 4.2  | 363.0  | 55.7  | 167 | 0.9 | NA |
| Spot 43  | 245  | 7271  | 2.3 | 17.7577 | 2.1 | 0.1962 | 3.3 | 0.0263 | 0.6 | 0.17 | 167.1 | 0.9 | 181.9 | 5.5  | 379.5  | 72.9  | 167 | 0.9 | NA |
| Spot 150 | 302  | 8629  | 1.7 | 17.9655 | 1.7 | 0.1966 | 2.4 | 0.0265 | 0.5 | 0.22 | 168.9 | 0.9 | 182.2 | 4.1  | 358.7  | 53.6  | 169 | 0.9 | NA |
| Spot 25  | 273  | 8202  | 0.8 | 17.3283 | 2.0 | 0.2049 | 2.5 | 0.0266 | 0.6 | 0.22 | 169.2 | 0.9 | 189.2 | 4.4  | 447.4  | 55.2  | 169 | 0.9 | NA |
| Spot 95  | 219  | 5644  | 2.8 | 17.1003 | 2.0 | 0.2053 | 4.9 | 0.0266 | 0.6 | 0.12 | 169.5 | 1.0 | 189.6 | 8.5  | 447.4  | 108.8 | 170 | 1.0 | NA |
| Spot 22  | 228  | 5973  | 0.9 | 18.1468 | 2.0 | 0.1936 | 2.6 | 0.0267 | 0.6 | 0.22 | 169.7 | 0.9 | 179.7 | 4.2  | 313.9  | 57.3  | 170 | 0.9 | NA |
| Spot 10  | 251  | 7416  | 1.9 | 17.8611 | 1.9 | 0.1991 | 3.2 | 0.0268 | 0.6 | 0.18 | 170.3 | 1.0 | 184.4 | 5.4  | 369.3  | 71.0  | 170 | 1.0 | NA |
| Spot 90  | 925  | 22228 | 1.9 | 19.5774 | 0.9 | 0.1857 | 1.2 | 0.0268 | 0.6 | 0.50 | 170.5 | 1.0 | 173.0 | 1.9  | 207.0  | 23.5  | 171 | 1.0 | NA |
| Spot 131 | 333  | 11102 | 1.9 | 17.9519 | 1.7 | 0.2005 | 2.0 | 0.0268 | 0.6 | 0.29 | 170.8 | 1.0 | 185.5 | 3.5  | 377.8  | 44.1  | 171 | 1.0 | NA |
| Spot 112 | 581  | 16036 | 1.5 | 19.2014 | 1.2 | 0.1896 | 1.8 | 0.0269 | 0.7 | 0.39 | 170.9 | 1.1 | 176.3 | 2.8  | 249.3  | 37.2  | 171 | 1.1 | NA |
| Spot 49  | 314  | 9012  | 1.8 | 17.8961 | 1.7 | 0.2002 | 2.3 | 0.0269 | 0.6 | 0.26 | 170.9 | 1.0 | 185.3 | 3.9  | 373.2  | 50.4  | 171 | 1.0 | NA |
| Spot 8   | 360  | 9582  | 1.6 | 18.7884 | 1.3 | 0.1914 | 2.7 | 0.0269 | 0.6 | 0.21 | 171.0 | 1.0 | 177.8 | 4.4  | 269.4  | 60.3  | 171 | 1.0 | NA |
| Spot 92  | 187  | 1590  | 2.6 | 15.1365 | 2.6 | 0.2102 | 8.4 | 0.0269 | 0.6 | 0.08 | 171.0 | 1.1 | 193.8 | 14.7 | 480.7  | 184.3 | 171 | 1.1 | NA |
| Spot 102 | 322  | 9481  | 1.9 | 18.5008 | 1.5 | 0.1953 | 2.2 | 0.0270 | 0.6 | 0.26 | 171.7 | 1.0 | 181.2 | 3.7  | 306.2  | 49.0  | 172 | 1.0 | NA |
| Spot 144 | 789  | 25439 | 0.7 | 19.4679 | 0.9 | 0.1885 | 1.1 | 0.0270 | 0.4 | 0.39 | 172.0 | 0.8 | 175.3 | 1.8  | 219.7  | 24.4  | 172 | 0.8 | NA |
| Spot 57  | 720  | 20225 | 1.0 | 19.3877 | 0.9 | 0.1890 | 1.5 | 0.0271 | 0.5 | 0.34 | 172.4 | 0.8 | 175.8 | 2.3  | 222.6  | 31.5  | 172 | 0.8 | NA |
| Spot 28  | 211  | 6375  | 2.7 | 17.0194 | 2.3 | 0.2111 | 3.1 | 0.0271 | 0.5 | 0.15 | 172.5 | 0.8 | 194.4 | 5.4  | 470.2  | 67.4  | 172 | 0.8 | NA |
| Spot 123 | 192  | 5927  | 2.5 | 16.4908 | 2.8 | 0.2168 | 3.2 | 0.0271 | 0.5 | 0.16 | 172.5 | 0.8 | 199.2 | 5.7  | 528.9  | 68.7  | 172 | 0.8 | NA |
| Spot 47  | 117  | 3691  | 1.7 | 15.3628 | 2.8 | 0.2283 | 5.2 | 0.0272 | 0.7 | 0.14 | 172.7 | 1.2 | 208.8 | 9.8  | 638.5  | 110.8 | 173 | 1.2 | NA |
| Spot 51  | 426  | 13573 | 1.6 | 18.7737 | 1.4 | 0.1959 | 1.7 | 0.0273 | 0.5 | 0.31 | 173.8 | 0.9 | 181.6 | 2.8  | 285.0  | 36.5  | 174 | 0.9 | NA |
| Spot 76  | 382  | 12938 | 1.9 | 18.8099 | 1.4 | 0.1954 | 2.0 | 0.0274 | 0.5 | 0.27 | 174.0 | 0.9 | 181.2 | 3.3  | 276.8  | 43.8  | 174 | 0.9 | NA |
| Spot 48  | 227  | 7233  | 2.2 | 17.1243 | 2.4 | 0.2121 | 4.0 | 0.0274 | 0.6 | 0.14 | 174.1 | 0.9 | 195.3 | 7.2  | 459.6  | 88.6  | 174 | 0.9 | NA |
| Spot 18  | 371  | 11719 | 1.8 | 18.3646 | 1.6 | 0.2010 | 2.5 | 0.0274 | 0.6 | 0.23 | 174.1 | 1.0 | 185.9 | 4.2  | 338.4  | 54.5  | 174 | 1.0 | NA |
| Spot 103 | 331  | 6863  | 1.7 | 18.3990 | 1.8 | 0.1970 | 3.2 | 0.0274 | 0.5 | 0.17 | 174.2 | 0.9 | 182.6 | 5.4  | 293.1  | 72.7  | 174 | 0.9 | NA |
| Spot 41  | 448  | 13509 | 0.8 | 18.8632 | 1.4 | 0.1960 | 2.3 | 0.0274 | 0.9 | 0.39 | 174.2 | 1.6 | 181.7 | 3.9  | 281.0  | 49.2  | 174 | 1.6 | NA |
| Spot 17  | 394  | 10018 | 2.0 | 18.4166 | 1.4 | 0.1998 | 1.8 | 0.0274 | 0.5 | 0.29 | 174.4 | 0.9 | 185.0 | 3.0  | 321.8  | 38.5  | 174 | 0.9 | NA |
| Spot 81  | 139  | 4488  | 2.1 | 14.5089 | 3.6 | 0.2476 | 5.2 | 0.0275 | 0.6 | 0.12 | 174.6 | 1.1 | 224.6 | 10.4 | 787.4  | 107.8 | 175 | 1.1 | NA |
| Spot 14  | 359  | 11328 | 1.7 | 18.4587 | 1.5 | 0.2003 | 2.6 | 0.0275 | 0.6 | 0.22 | 174.7 | 1.0 | 185.4 | 4.3  | 323.7  | 56.6  | 175 | 1.0 | NA |
| Spot 115 | 348  | 11580 | 1.8 | 18.4954 | 1.5 | 0.1999 | 2.1 | 0.0275 | 0.8 | 0.40 | 174.8 | 1.5 | 185.1 | 3.6  | 318.6  | 43.9  | 175 | 1.5 | NA |
| Spot 136 | 251  | 7598  | 2.3 | 18.0059 | 2.1 | 0.2026 | 4.1 | 0.0275 | 0.6 | 0.13 | 175.1 | 1.0 | 187.3 | 7.1  | 343.7  | 93.0  | 175 | 1.0 | NA |
| Spot 64  | 117  | 3751  | 1.7 | 16.0222 | 3.0 | 0.2217 | 4.9 | 0.0276 | 0.6 | 0.12 | 175.5 | 1.0 | 203.3 | 9.1  | 539.8  | 106.9 | 175 | 1.0 | NA |
| Spot 35  | 205  | 6047  | 1.6 | 17.0361 | 2.8 | 0.2142 | 4.1 | 0.0276 | 0.7 | 0.18 | 175.6 | 1.3 | 197.1 | 7.4  | 462.5  | 90.4  | 176 | 1.3 | NA |
| Spot 53  | 842  | 26029 | 1.4 | 19.8377 | 0.9 | 0.1891 | 1.3 | 0.0276 | 0.6 | 0.41 | 175.6 | 1.0 | 175.8 | 2.2  | 178.5  | 28.3  | 176 | 1.0 | NA |
| Spot 114 | 245  | 5883  | 2.1 | 17.5030 | 1.9 | 0.2082 | 4.0 | 0.0277 | 0.6 | 0.14 | 175.9 | 1.0 | 192.1 | 7.0  | 396.2  | 88.4  | 176 | 1.0 | NA |
| Spot 88  | 323  | 10961 | 1.7 | 18.4091 | 1.4 | 0.2016 | 1.7 | 0.0277 | 0.6 | 0.34 | 176.0 | 1.0 | 186.4 | 2.9  | 321.0  | 36.2  | 176 | 1.0 | NA |
| Spot 63  | 253  | 7796  | 2.9 | 17.2232 | 2.0 | 0.2136 | 3.9 | 0.0277 | 0.5 | 0.14 | 176.2 | 0.9 | 196.6 | 6.9  | 449.1  | 85.1  | 176 | 0.9 | NA |
| Spot 117 | 180  | 5471  | 1.8 | 16.0868 | 2.8 | 0.2291 | 3.6 | 0.0279 | 0.7 | 0.18 | 177.6 | 1.1 | 209.4 | 6.8  | 584.1  | 76.7  | 178 | 1.1 | NA |
| Spot 124 | 154  | 4572  | 2.7 | 15.9064 | 2.6 | 0.2296 | 4.1 | 0.0280 | 0.6 | 0.15 | 177.9 | 1.1 | 209.9 | 7.8  | 585.5  | 87.7  | 178 | 1.1 | NA |
| Spot 104 | 389  | 6646  | 1.6 | 18.5140 | 1.6 | 0.2010 | 3.6 | 0.0281 | 0.6 | 0.17 | 178.8 | 1.1 | 186.0 | 6.1  | 278.3  | 80.3  | 179 | 1.1 | NA |
| Spot 61  | 1176 | 39778 | 2.0 | 19.8446 | 0.9 | 0.1934 | 1.3 | 0.0282 | 0.8 | 0.58 | 179.2 | 1.4 | 179.6 | 2.2  | 184.4  | 25.2  | 179 | 1.4 | NA |
| Spot 38  | 290  | 7575  | 1.1 | 17.9013 | 2.1 | 0.2092 | 2.5 | 0.0282 | 0.6 | 0.25 | 179.2 | 1.1 | 192.9 | 4.3  | 364    |       |     |     |    |

|          |      |       |     |         |     |        |      |        |     |      |        |      |        |      |        |       |      |      |     |
|----------|------|-------|-----|---------|-----|--------|------|--------|-----|------|--------|------|--------|------|--------|-------|------|------|-----|
| Spot 24  | 561  | 2600  | 3.3 | 17.0404 | 1.9 | 0.2617 | 10.4 | 0.0358 | 0.6 | 0.05 | 226.8  | 1.3  | 236.0  | 22.0 | 328.9  | 236.7 | 227  | 1.3  | NA  |
| Spot 89  | 446  | 18930 | 3.7 | 18.8081 | 1.1 | 0.2591 | 1.5  | 0.0360 | 0.6 | 0.43 | 227.9  | 1.4  | 233.9  | 3.1  | 295.5  | 30.2  | 228  | 1.4  | NA  |
| Spot 118 | 338  | 15099 | 3.4 | 18.6300 | 1.3 | 0.2612 | 1.8  | 0.0360 | 0.6 | 0.35 | 228.0  | 1.4  | 235.6  | 3.8  | 312.2  | 38.2  | 228  | 1.4  | NA  |
| Spot 4   | 378  | 15355 | 4.0 | 18.7166 | 1.0 | 0.2605 | 1.5  | 0.0361 | 0.5 | 0.35 | 228.3  | 1.2  | 235.1  | 3.2  | 303.3  | 32.9  | 228  | 1.2  | NA  |
| Spot 128 | 1658 | 69605 | 2.2 | 19.5839 | 0.8 | 0.2526 | 1.1  | 0.0361 | 0.7 | 0.66 | 228.9  | 1.7  | 228.7  | 2.3  | 226.2  | 19.1  | 229  | 1.7  | NA  |
| Spot 139 | 501  | 20043 | 2.7 | 19.1412 | 1.1 | 0.2587 | 1.4  | 0.0366 | 0.6 | 0.45 | 231.8  | 1.4  | 233.6  | 2.9  | 251.7  | 28.9  | 232  | 1.4  | NA  |
| Spot 65  | 651  | 25837 | 2.7 | 19.4102 | 1.2 | 0.2571 | 1.9  | 0.0368 | 1.0 | 0.55 | 232.8  | 2.4  | 232.3  | 4.0  | 228.0  | 37.0  | 233  | 2.4  | NA  |
| Spot 113 | 790  | 28025 | 2.8 | 19.6279 | 0.8 | 0.2559 | 1.1  | 0.0368 | 0.5 | 0.51 | 233.2  | 1.2  | 231.4  | 2.2  | 213.4  | 21.3  | 233  | 1.2  | NA  |
| Spot 6   | 765  | 29008 | 2.9 | 19.5157 | 0.7 | 0.2575 | 1.1  | 0.0369 | 0.5 | 0.44 | 233.3  | 1.1  | 232.7  | 2.3  | 225.9  | 22.8  | 233  | 1.1  | NA  |
| Spot 98  | 1020 | 39079 | 1.4 | 19.3668 | 0.8 | 0.2716 | 1.1  | 0.0385 | 0.6 | 0.55 | 243.4  | 1.4  | 243.9  | 2.4  | 249.2  | 21.1  | 243  | 1.4  | NA  |
| Spot 99  | 297  | 13177 | 2.5 | 18.7338 | 1.3 | 0.3045 | 2.1  | 0.0423 | 0.5 | 0.26 | 267.0  | 1.4  | 269.9  | 5.0  | 295.8  | 46.6  | 267  | 1.4  | NA  |
| Spot 58  | 407  | 12266 | 3.9 | 10.6370 | 1.1 | 0.5602 | 1.3  | 0.0439 | 0.5 | 0.37 | 277.1  | 1.3  | 451.7  | 4.8  | 1477.9 | 23.3  | 277  | 1.3  | NA  |
| Spot 3   | 24   | 3765  | 2.0 | 12.7922 | 2.8 | 1.8117 | 4.0  | 0.1768 | 0.6 | 0.15 | 1049.7 | 5.7  | 1049.7 | 26.2 | 1049.8 | 79.8  | 1050 | 79.8 | 100 |
| Spot 67  | 145  | 29115 | 2.5 | 13.1076 | 0.7 | 1.9114 | 1.0  | 0.1837 | 0.5 | 0.55 | 1087.3 | 5.5  | 1085.1 | 6.7  | 1080.7 | 16.8  | 1081 | 16.8 | 101 |
| Spot 56  | 385  | 69513 | 6.9 | 13.0792 | 0.7 | 1.9095 | 0.9  | 0.1825 | 0.6 | 0.68 | 1080.8 | 6.2  | 1084.4 | 6.1  | 1091.7 | 13.5  | 1092 | 13.5 | 99  |
| Spot 5   | 67   | 13454 | 4.0 | 12.0002 | 1.0 | 2.4155 | 1.7  | 0.2132 | 0.7 | 0.38 | 1245.7 | 7.5  | 1247.2 | 12.4 | 1249.9 | 31.2  | 1250 | 31.2 | 100 |
| Spot 127 | 88   | 20293 | 3.0 | 11.3224 | 0.7 | 2.8522 | 0.9  | 0.2368 | 0.5 | 0.57 | 1370.1 | 6.4  | 1369.4 | 6.8  | 1368.3 | 14.3  | 1368 | 14.3 | 100 |
| Spot 94  | 94   | 23676 | 1.6 | 11.3168 | 0.8 | 2.8942 | 1.2  | 0.2392 | 0.7 | 0.56 | 1382.6 | 8.5  | 1380.4 | 9.2  | 1376.9 | 19.3  | 1377 | 19.3 | 100 |
| Spot 137 | 163  | 49914 | 3.6 | 10.8736 | 0.7 | 3.1481 | 0.9  | 0.2502 | 0.6 | 0.66 | 1439.8 | 7.7  | 1444.5 | 6.9  | 1451.6 | 12.9  | 1452 | 12.9 | 99  |
| Spot 106 | 194  | 55863 | 3.7 | 10.1072 | 0.6 | 3.8307 | 0.9  | 0.2813 | 0.6 | 0.69 | 1598.1 | 8.8  | 1599.2 | 7.2  | 1600.7 | 12.2  | 1601 | 12.2 | 100 |
| Spot 60  | 234  | 71220 | 2.0 | 9.1677  | 0.6 | 4.8071 | 0.9  | 0.3218 | 0.6 | 0.68 | 1798.5 | 9.4  | 1786.1 | 7.4  | 1771.8 | 11.7  | 1772 | 11.7 | 102 |
| Spot 46  | 97   | 30762 | 1.7 | 9.1571  | 0.7 | 4.7457 | 1.0  | 0.3174 | 0.7 | 0.66 | 1777.1 | 10.3 | 1775.3 | 8.4  | 1773.2 | 13.9  | 1773 | 13.9 | 100 |
| Spot 66  | 22   | 7789  | 6.3 | 8.9629  | 1.2 | 4.9326 | 1.9  | 0.3272 | 0.5 | 0.26 | 1824.9 | 8.2  | 1807.8 | 16.4 | 1788.2 | 34.0  | 1788 | 34.0 | 102 |
| Spot 85  | 196  | 14027 | 6.3 | 8.7687  | 0.6 | 4.9998 | 0.9  | 0.3222 | 0.6 | 0.69 | 1800.4 | 9.4  | 1819.3 | 7.3  | 1841.0 | 11.3  | 1841 | 11.3 | 98  |
| Spot 59  | 80   | 26783 | 2.2 | 8.6459  | 0.6 | 5.3714 | 0.8  | 0.3400 | 0.6 | 0.66 | 1886.6 | 9.1  | 1880.3 | 7.2  | 1873.4 | 11.5  | 1873 | 11.5 | 101 |

ELM18DVT-C-10

|          |     |      |     |         |      |        |      |        |     |      |      |     |      |      |        |        |      |     |    |
|----------|-----|------|-----|---------|------|--------|------|--------|-----|------|------|-----|------|------|--------|--------|------|-----|----|
| Spot 72  | 167 | 665  | 1.1 | 7.0226  | 13.7 | 0.0002 | 17.0 | 0.0000 | 0.6 | 0.03 | 0.1  | 0.0 | 0.2  | 0.0  | 1984.9 | 303.9  | 0.1  | 0.0 | NA |
| Spot 23  | 127 | 238  | 1.2 | 5.4222  | 11.6 | 0.0263 | 25.5 | 0.0015 | 0.5 | 0.02 | 9.6  | 0.1 | 26.3 | 6.6  | 2074.1 | 456.1  | 9.6  | 0.1 | NA |
| Spot 37  | 68  | 187  | 0.6 | 4.0972  | 23.7 | 0.0412 | 29.8 | 0.0017 | 0.5 | 0.02 | 10.9 | 0.1 | 41.0 | 12.0 | 2628.9 | 507.6  | 10.9 | 0.1 | NA |
| Spot 92  | 132 | 105  | 0.9 | 4.4670  | 12.0 | 0.0210 | 70.1 | 0.0017 | 0.6 | 0.01 | 10.9 | 0.1 | 21.1 | 14.6 | 1430.7 | 1575.2 | 10.9 | 0.1 | NA |
| Spot 90  | 64  | 180  | 0.9 | 5.9465  | 19.4 | 0.0224 | 83.4 | 0.0018 | 0.6 | 0.01 | 11.6 | 0.1 | 22.5 | 18.6 | 1433.8 | 2103.4 | 11.6 | 0.1 | NA |
| Spot 34  | 112 | 295  | 0.8 | 4.6642  | 15.8 | 0.0434 | 25.1 | 0.0018 | 0.5 | 0.02 | 11.8 | 0.1 | 43.2 | 10.6 | 2573.8 | 427.2  | 11.8 | 0.1 | NA |
| Spot 112 | 44  | 146  | 0.9 | 4.4217  | 23.1 | 0.0346 | 60.3 | 0.0019 | 0.8 | 0.01 | 11.9 | 0.1 | 34.6 | 20.5 | 2171.1 | 1181.6 | 11.9 | 0.1 | NA |
| Spot 125 | 65  | 149  | 0.6 | 5.4790  | 18.7 | 0.0228 | 85.5 | 0.0019 | 0.6 | 0.01 | 12.1 | 0.1 | 22.9 | 19.3 | 1380.6 | NA     | 12.1 | 0.1 | NA |
| Spot 27  | 86  | 216  | 0.6 | 4.9801  | 17.5 | 0.0369 | 25.9 | 0.0019 | 0.5 | 0.02 | 12.3 | 0.1 | 36.8 | 9.4  | 2227.6 | 457.6  | 12.3 | 0.1 | NA |
| Spot 69  | 66  | 162  | 0.8 | 4.0755  | 18.0 | 0.0443 | 26.5 | 0.0019 | 0.7 | 0.03 | 12.4 | 0.1 | 44.0 | 11.4 | 2533.6 | 454.0  | 12.4 | 0.1 | NA |
| Spot 91  | 102 | 140  | 1.0 | 3.7471  | 15.3 | 0.0479 | 51.5 | 0.0020 | 0.6 | 0.01 | 12.6 | 0.1 | 47.5 | 23.9 | 2633.8 | 929.5  | 12.6 | 0.1 | NA |
| Spot 57  | 26  | 119  | 0.8 | 3.7731  | 26.8 | 0.0428 | 42.9 | 0.0020 | 0.4 | 0.01 | 12.7 | 0.1 | 42.6 | 17.9 | 2434.0 | 767.3  | 12.7 | 0.1 | NA |
| Spot 98  | 26  | 135  | 1.1 | 3.9263  | 32.5 | 0.0435 | 61.3 | 0.0020 | 0.5 | 0.01 | 12.7 | 0.1 | 43.2 | 26.0 | 2459.1 | 1174.8 | 12.7 | 0.1 | NA |
| Spot 79  | 75  | 196  | 0.9 | 3.6965  | 19.2 | 0.0583 | 29.3 | 0.0020 | 0.5 | 0.02 | 13.0 | 0.1 | 57.5 | 16.4 | 2905.3 | 486.1  | 13.0 | 0.1 | NA |
| Spot 143 | 51  | 174  | 0.7 | 3.8679  | 25.3 | 0.0523 | 41.9 | 0.0020 | 0.6 | 0.01 | 13.0 | 0.1 | 51.8 | 21.1 | 2726.5 | 727.5  | 13.0 | 0.1 | NA |
| Spot 33  | 123 | 279  | 2.1 | 4.5420  | 18.0 | 0.0488 | 26.8 | 0.0020 | 0.7 | 0.02 | 13.0 | 0.1 | 48.4 | 12.7 | 2608.0 | 455.6  | 13.0 | 0.1 | NA |
| Spot 3   | 131 | 298  | 1.8 | 4.3896  | 13.2 | 0.0527 | 16.8 | 0.0021 | 0.5 | 0.03 | 13.2 | 0.1 | 52.2 | 8.5  | 2709.6 | 278.5  | 13.2 | 0.1 | NA |
| Spot 64  | 67  | 202  | 1.0 | 4.5903  | 23.8 | 0.0438 | 45.0 | 0.0021 | 0.5 | 0.01 | 13.3 | 0.1 | 43.6 | 19.2 | 2395.4 | 814.4  | 13.3 | 0.1 | NA |
| Spot 22  | 396 | 278  | 0.6 | 6.8311  | 10.8 | 0.0274 | 33.2 | 0.0021 | 1.1 | 0.03 | 13.3 | 0.1 | 27.4 | 9.0  | 1553.3 | 642.2  | 13.3 | 0.1 | NA |
| Spot 41  | 300 | 678  | 0.9 | 6.0158  | 14.5 | 0.0422 | 17.0 | 0.0021 | 4.0 | 0.23 | 13.4 | 0.5 | 41.9 | 7.0  | 2306.9 | 285.5  | 13.4 | 0.5 | NA |
| Spot 86  | 64  | 180  | 0.6 | 5.0567  | 25.6 | 0.0356 | 43.6 | 0.0021 | 0.9 | 0.02 | 13.5 | 0.1 | 35.5 | 15.2 | 2004.2 | 817.0  | 13.5 | 0.1 | NA |
| Spot 45  | 121 | 294  | 0.8 | 3.9556  | 18.4 | 0.0624 | 25.2 | 0.0021 | 0.6 | 0.02 | 13.7 | 0.1 | 61.5 | 15.0 | 2923.5 | 415.0  | 13.7 | 0.1 | NA |
| Spot 83  | 66  | 222  | 0.6 | 4.1614  | 18.0 | 0.0547 | 23.4 | 0.0021 | 0.6 | 0.03 | 13.8 | 0.1 | 54.1 | 12.3 | 2696.4 | 392.3  | 13.8 | 0.1 | NA |
| Spot 97  | 94  | 191  | 0.8 | 4.7479  | 18.4 | 0.0423 | 34.6 | 0.0022 | 0.6 | 0.02 | 13.9 | 0.1 | 42.1 | 14.3 | 2251.1 | 617.5  | 13.9 | 0.1 | NA |
| Spot 1   | 63  | 172  | 0.4 | 4.0447  | 18.1 | 0.0526 | 33.2 | 0.0022 | 0.6 | 0.02 | 14.1 | 0.1 | 52.0 | 16.8 | 2601.8 | 571.7  | 14.1 | 0.1 | NA |
| Spot 77  | 250 | 513  | 0.7 | 5.8365  | 9.4  | 0.0439 | 14.6 | 0.0022 | 1.1 | 0.07 | 14.1 | 0.2 | 43.6 | 6.2  | 2295.9 | 251.2  | 14.1 | 0.2 | NA |
| Spot 32  | 138 | 296  | 0.8 | 4.5471  | 13.9 | 0.0536 | 21.0 | 0.0022 | 0.5 | 0.02 | 14.1 | 0.1 | 53.0 | 10.9 | 2630.8 | 353.7  | 14.1 | 0.1 | NA |
| Spot 81  | 291 | 608  | 1.4 | 7.3359  | 9.9  | 0.0343 | 12.1 | 0.0022 | 0.5 | 0.04 | 14.1 | 0.1 | 34.3 | 4.1  | 1859.5 | 220.0  | 14.1 | 0.1 | NA |
| Spot 26  | 114 | 253  | 1.2 | 4.1259  | 14.3 | 0.0586 | 17.2 | 0.0022 | 0.5 | 0.03 | 14.1 | 0.1 | 57.9 | 9.7  | 2777.8 | 285.0  | 14.1 | 0.1 | NA |
| Spot 29  | 78  | 214  | 1.0 | 4.0567  | 20.2 | 0.0573 | 34.0 | 0.0022 | 0.6 | 0.02 | 14.1 | 0.1 | 56.6 | 18.7 | 2736.2 | 578.5  | 14.1 | 0.1 | NA |
| Spot 96  | 83  | 234  | 0.6 | 5.0538  | 16.1 | 0.0430 | 35.9 | 0.0022 | 0.6 | 0.02 | 14.2 | 0.1 | 42.8 | 15.0 | 2247.8 | 643.7  | 14.2 | 0.1 | NA |
| Spot 49  | 130 | 299  | 0.5 | 4.5486  | 14.5 | 0.0544 | 16.5 | 0.0022 | 0.5 | 0.03 | 14.3 | 0.1 | 53.8 | 8.7  | 2637.3 | 276.8  | 14.3 | 0.1 | NA |
| Spot 20  | 104 | 275  | 0.7 | 5.5391  | 14.3 | 0.0404 | 19.9 | 0.0022 | 0.5 | 0.03 | 14.3 | 0.1 | 40.2 | 7.8  | 2125.5 | 352.4  | 14.3 | 0.1 | NA |
| Spot 114 | 334 | 238  | 0.8 | 6.4239  | 8.6  | 0.0296 | 45.7 | 0.0022 | 0.5 | 0.01 | 14.3 | 0.1 | 29.7 | 13.4 | 1564.1 | 908.2  | 14.3 | 0.1 | NA |
| Spot 15  | 75  | 220  | 1.2 | 4.6927  | 16.4 | 0.0473 | 36.4 | 0.0022 | 0.6 | 0.02 | 14.3 | 0.1 | 46.9 | 16.7 | 2396.5 | 643.5  | 14.3 | 0.1 | NA |
| Spot 147 | 139 | 319  | 0.6 | 4.8730  | 17.0 | 0.0508 | 19.7 | 0.0022 | 0.7 | 0.03 | 14.4 | 0.1 | 50.3 | 9.7  | 2509.4 | 334.8  | 14.4 | 0.1 | NA |
| Spot 76  | 368 | 705  | 0.8 | 7.7759  | 9.1  | 0.0336 | 11.4 | 0.0022 | 0.5 | 0.05 | 14.4 | 0.1 | 33.5 | 3.8  | 1781.8 | 208.8  | 14.4 | 0.1 | NA |
| Spot 30  | 155 | 354  | 0.6 | 5.2423  | 12.8 | 0.0476 | 17.5 | 0.0022 | 0.8 | 0.05 | 14.4 | 0.1 | 47.2 | 8.1  | 2392.0 | 299.6  | 14.4 | 0.1 | NA |
| Spot 44  | 54  | 177  | 0.8 | 4.0413  | 31.6 | 0.0551 | 41.6 | 0.0023 | 0.5 | 0.01 | 14.5 | 0.1 | 54.4 | 22.1 | 2627.5 | 729.2  | 14.5 | 0.1 | NA |
| Spot 150 | 134 | 353  | 0.9 | 4.9772  | 13.7 | 0.0512 | 16.4 | 0.0023 | 0.6 | 0.04 | 14.5 | 0.1 | 50.7 | 8.1  | 2503.6 | 277.3  | 14.5 | 0.1 | NA |
| Spot 58  | 309 | 818  | 0.7 | 6.3663  | 11.1 | 0.0438 | 11.5 | 0.0023 | 0.6 | 0.05 | 14.5 | 0.1 | 43.5 | 4.9  | 2236.6 | 200.0  | 14.5 | 0.1 | NA |
| Spot 133 | 176 | 422  | 0.8 | 6.5484  | 15.8 | 0.0375 | 21.4 | 0.0023 | 0.5 | 0.03 | 14.6 | 0.1 | 37.4 | 7.8  | 1960.7 | 385.9  | 14.6 | 0.1 | NA |
| Spot 74  | 283 | 684  | 0.6 | 8.4521  | 8.9  | 0.0305 | 11.6 | 0.0023 | 0.6 | 0.05 | 14.6 | 0.1 | 30.5 | 3.5  | 1582.6 | 217.7  | 14.6 | 0.1 | NA |
| Spot 55  | 289 | 634  | 0.7 | 7.0401  | 10.1 | 0.0379 | 17.2 | 0.0023 | 0.6 | 0.03 | 14.7 | 0.1 | 37.7 | 6.4  | 1964.9 | 308.7  | 14.7 | 0.1 | NA |
| Spot 117 | 347 | 779  | 0.7 | 8.2834  | 10.1 | 0.0322 | 16.6 | 0.0023 | 0.6 | 0.04 | 14.7 | 0.1 | 32.2 | 5.3  | 1669.3 | 309.9  | 14.7 | 0.1 | NA |
| Spot 40  | 109 | 292  | 0.5 | 4.6094  | 20.7 | 0.0547 | 23.5 | 0.0023 | 0.5 | 0.02 | 14.7 | 0.1 | 54.1 | 12.4 | 2594.0 | 397.3  | 14.7 | 0.1 | NA |
| Spot 131 | 93  | 261  | 0.5 | 4.4880  | 16.4 | 0.0550 | 19.2 | 0.0023 | 0.6 | 0.03 | 14.7 | 0.1 | 54.4 | 10.2 | 2600.2 | 323.0  | 14.7 | 0.1 | NA |
| Spot 62  | 52  | 162  | 0.9 | 3.6376  | 22.5 | 0.0635 | 30.0 | 0.0023 | 0.6 | 0.02 | 14.7 | 0.1 | 62.5 | 18.2 | 2833.8 | 501.9  | 14.7 | 0.1 | NA |
| Spot 108 | 281 | 289  | 0.8 | 6.2265  | 9.2  | 0.0358 | 38.6 | 0.0023 | 0.6 | 0.01 | 14.8 | 0.1 | 35.7 | 13.5 | 1849.5 | 727.9  | 14.8 | 0.1 | NA |
| Spot 126 | 219 | 386  | 0.6 | 5.8861  | 13.1 | 0.0428 | 17.4 | 0.0023 | 0.5 | 0.03 | 14.8 | 0.1 | 42.6 | 7.3  | 2164.7 | 305.7  | 14.8 | 0.1 | NA |
| Spot 73  | 378 | 860  | 0.8 | 8.1509  | 7.6  | 0.0338 | 13.2 | 0.0023 | 0.5 | 0.04 | 14.8 | 0.1 | 33.7 | 4.4  | 1740.1 | 242.2  | 14.8 | 0.1 | NA |
| Spot 87  | 161 | 414  | 0.9 | 4.8131  | 18.1 | 0.0563 | 21.8 | 0.0023 | 0.6 | 0.03 | 14.8 | 0.1 | 55.6 | 11.8 | 2627.9 | 366.6  | 14.8 | 0.1 | NA |
| Spot 132 | 289 | 656  | 0.5 | 7.3123  | 12.4 | 0.0367 | 13.6 | 0.0023 | 0.5 | 0.04 | 14.8 | 0.1 | 36.6 | 4.9  | 1888.3 | 245.3  | 14.8 | 0.1 | NA |
| Spot 39  | 276 | 699  | 0.4 | 7.5666  | 10.8 | 0.0357 | 14.4 | 0.0023 | 0.5 | 0.04 | 14.8 | 0.1 | 35.6 | 5.0  | 1837.7 | 261.2  | 14.8 | 0.1 | NA |
| Spot 47  | 228 | 686  | 1.3 | 5.9237  | 11.7 | 0.0475 | 13.2 | 0.0023 | 0.5 | 0.04 | 14.8 | 0.1 | 47.2 | 6.1  | 2341.1 | 227.2  | 14.8 | 0.1 | NA |
| Spot 52  | 235 | 506  | 0.6 | 6.2477  | 13.6 | 0.0426 | 22.3 | 0.0023 | 0.5 | 0.02 | 14.9 | 0.1 | 42.4 | 9.3  | 2149.1 | 395.1  | 14.9 | 0.1 | NA |
| Spot 75  | 179 | 429  | 0.7 | 4.7850  | 15.8 | 0.0573 | 21.0 | 0.0023 | 0.7 | 0.03 | 14.9 | 0.1 | 56.5 | 11.6 | 2651.2 | 353.2  | 14.9 | 0.1 | NA |
| Spot 35  | 56  | 244  | 0.6 | 3.9583  | 25.2 | 0.0648 | 27.1 | 0.0023 | 0.6 | 0.02 | 14.9 | 0.1 | 63.7 | 16.7 | 2853.1 | 450.9  | 14.9 | 0.1 | NA |
| Spot 10  | 114 | 328  | 1.4 | 4.8528  | 16.2 | 0.0533 | 24.4 | 0.0023 | 0.6 | 0.02 | 14.9 | 0.1 | 52.7 | 12.5 | 2530.9 | 415.6  | 14.9 | 0.1 | NA |
| Spot 54  | 250 | 580  | 0.3 | 6.1026  | 9.3  | 0.0450 | 10.3 | 0.0023 | 0.5 | 0.05 | 14.9 | 0.1 | 44.7 | 4.5  | 2239.9 | 178.6  | 14.9 | 0.1 | NA |
| Spot 116 | 322 | 815  | 1.0 | 7.5031  | 10.4 | 0.0371 | 15.5 | 0.0023 | 0.6 | 0.04 | 14.9 | 0.1 | 37.0 | 5.6  | 1896.2 | 280.9  | 14.9 | 0.1 | NA |
| Spot 84  | 258 | 562  | 0.8 | 7.2574  | 10.0 | 0.0363 | 15.9 | 0.0023 | 0.5 | 0.03 | 15.0 | 0.1 | 36.2 | 5.7  | 1853.3 | 289.4  | 15.0 | 0.1 | NA |
| Spot 38  | 220 | 664  | 1.0 | 5.9205  | 13.8 | 0.0478 | 15.9 | 0.0023 | 0.6 | 0.04 | 15.0 | 0.1 | 47.4 | 7.4  | 2344.4 | 274.3  | 15.0 | 0.1 | NA |
| Spot 48  | 352 | 886  | 0.4 | 7.6750  | 8.1  | 0.0368 | 13.5 | 0.0023 | 1.3 | 0.09 | 15.0 | 0.2 | 36.7 | 4.9  | 1876.3 | 244.2  | 15.0 | 0.2 | NA |
| Spot 59  | 168 | 375  | 0.7 | 4.8124  | 14.5 | 0.0560 | 16.4 | 0.0023 | 0.7 | 0.04 | 15.0 | 0.1 | 55.3 | 8.8  | 2599.0 | 274.8  | 15.0 | 0.1 | NA |
| Spot 142 | 240 | 534  | 1.0 | 6.5207  | 15.7 | 0.0411 | 23.1 | 0.0023 | 0.6 | 0.02 | 15.0 | 0.1 | 40.9 | 9.3  | 2070.0 | 412.9  | 15.0 | 0.1 | NA |
| Spot 134 | 727 | 1703 | 1.0 | 10.6941 | 6.1  | 0.0273 | 10.9 | 0.0023 | 0.5 | 0.05 | 15.0 | 0.1 | 27.3 | 2.9  | 1312.5 | 212.2  | 15.0 | 0.1 | NA |
| Spot 102 | 100 | 280  | 0.8 | 3.8352  | 16.2 | 0.0705 | 18.2 | 0.0023 | 0.6 | 0.03 | 15.1 |     |      |      |        |        |      |     |    |

|          |      |      |     |         |      |        |       |        |     |      |      |     |      |      |        |       |      |     |    |
|----------|------|------|-----|---------|------|--------|-------|--------|-----|------|------|-----|------|------|--------|-------|------|-----|----|
| Spot 127 | 224  | 657  | 0.8 | 5.9871  | 11.5 | 0.0473 | 16.3  | 0.0023 | 0.6 | 0.04 | 15.1 | 0.1 | 47.0 | 7.5  | 2305.4 | 281.0 | 15.1 | 0.1 | NA |
| Spot 119 | 184  | 513  | 0.7 | 5.9022  | 13.6 | 0.0463 | 16.1  | 0.0023 | 0.6 | 0.04 | 15.1 | 0.1 | 46.0 | 7.2  | 2266.3 | 278.9 | 15.1 | 0.1 | NA |
| Spot 121 | 284  | 649  | 0.9 | 6.6772  | 11.7 | 0.0416 | 14.1  | 0.0023 | 0.6 | 0.04 | 15.1 | 0.1 | 41.4 | 5.7  | 2077.6 | 249.1 | 15.1 | 0.1 | NA |
| Spot 42  | 474  | 1320 | 1.4 | 10.0680 | 7.6  | 0.0286 | 13.5  | 0.0024 | 0.5 | 0.04 | 15.1 | 0.1 | 28.7 | 3.8  | 1390.6 | 259.1 | 15.1 | 0.1 | NA |
| Spot 129 | 556  | 1364 | 1.0 | 10.5238 | 6.4  | 0.0274 | 7.1   | 0.0024 | 0.8 | 0.12 | 15.2 | 0.1 | 27.4 | 1.9  | 1297.6 | 138.0 | 15.2 | 0.1 | NA |
| Spot 36  | 194  | 595  | 0.7 | 5.6139  | 12.5 | 0.0509 | 15.9  | 0.0024 | 0.5 | 0.03 | 15.2 | 0.1 | 50.4 | 7.8  | 2415.1 | 270.9 | 15.2 | 0.1 | NA |
| Spot 109 | 380  | 554  | 1.3 | 8.3258  | 11.2 | 0.0309 | 18.0  | 0.0024 | 0.5 | 0.03 | 15.3 | 0.1 | 30.9 | 5.5  | 1517.9 | 342.9 | 15.3 | 0.1 | NA |
| Spot 88  | 275  | 674  | 0.8 | 6.5067  | 12.7 | 0.0437 | 13.8  | 0.0024 | 0.5 | 0.03 | 15.3 | 0.1 | 43.5 | 5.9  | 2146.7 | 242.2 | 15.3 | 0.1 | NA |
| Spot 5   | 331  | 725  | 0.8 | 8.2019  | 10.0 | 0.0336 | 16.0  | 0.0024 | 0.6 | 0.04 | 15.3 | 0.1 | 33.6 | 5.3  | 1671.7 | 297.6 | 15.3 | 0.1 | NA |
| Spot 138 | 254  | 663  | 0.9 | 5.9980  | 13.9 | 0.0480 | 16.3  | 0.0024 | 0.6 | 0.04 | 15.3 | 0.1 | 47.6 | 7.6  | 2306.7 | 281.4 | 15.3 | 0.1 | NA |
| Spot 137 | 490  | 1141 | 0.5 | 9.9259  | 7.5  | 0.0289 | 8.9   | 0.0024 | 0.6 | 0.07 | 15.3 | 0.1 | 28.9 | 2.5  | 1384.1 | 170.5 | 15.3 | 0.1 | NA |
| Spot 80  | 254  | 593  | 0.9 | 6.7683  | 8.7  | 0.0410 | 13.6  | 0.0024 | 0.6 | 0.05 | 15.3 | 0.1 | 40.8 | 5.5  | 2027.3 | 242.5 | 15.3 | 0.1 | NA |
| Spot 71  | 292  | 699  | 0.8 | 8.1503  | 8.5  | 0.0337 | 11.0  | 0.0024 | 0.6 | 0.06 | 15.3 | 0.1 | 33.7 | 3.6  | 1674.3 | 203.8 | 15.3 | 0.1 | NA |
| Spot 124 | 213  | 527  | 1.5 | 6.3245  | 10.0 | 0.0435 | 20.0  | 0.0024 | 0.6 | 0.03 | 15.4 | 0.1 | 43.2 | 8.5  | 2128.8 | 354.3 | 15.4 | 0.1 | NA |
| Spot 105 | 301  | 795  | 0.5 | 7.5407  | 11.2 | 0.0378 | 16.2  | 0.0024 | 0.9 | 0.05 | 15.4 | 0.1 | 37.7 | 6.0  | 1880.0 | 292.8 | 15.4 | 0.1 | NA |
| Spot 113 | 144  | 365  | 1.0 | 4.8255  | 20.0 | 0.0566 | 23.5  | 0.0024 | 0.6 | 0.02 | 15.4 | 0.1 | 55.9 | 12.8 | 2579.3 | 398.3 | 15.4 | 0.1 | NA |
| Spot 111 | 266  | 676  | 0.5 | 7.5579  | 11.1 | 0.0367 | 19.9  | 0.0024 | 0.5 | 0.03 | 15.4 | 0.1 | 36.6 | 7.1  | 1825.5 | 364.1 | 15.4 | 0.1 | NA |
| Spot 21  | 430  | 929  | 0.9 | 10.9146 | 5.9  | 0.0251 | 18.9  | 0.0024 | 0.6 | 0.03 | 15.4 | 0.1 | 25.1 | 4.7  | 1095.5 | 381.7 | 15.4 | 0.1 | NA |
| Spot 99  | 276  | 808  | 1.1 | 5.8719  | 10.2 | 0.0507 | 13.0  | 0.0024 | 0.6 | 0.05 | 15.4 | 0.1 | 50.2 | 6.3  | 2388.1 | 221.3 | 15.4 | 0.1 | NA |
| Spot 115 | 461  | 855  | 0.9 | 10.5870 | 6.5  | 0.0255 | 10.8  | 0.0024 | 0.5 | 0.05 | 15.4 | 0.1 | 25.6 | 2.7  | 1130.7 | 214.6 | 15.4 | 0.1 | NA |
| Spot 2   | 421  | 1009 | 0.8 | 7.7541  | 8.7  | 0.0381 | 10.9  | 0.0024 | 0.6 | 0.06 | 15.4 | 0.1 | 37.9 | 4.1  | 1881.7 | 197.1 | 15.4 | 0.1 | NA |
| Spot 11  | 146  | 285  | 0.7 | 5.3021  | 15.7 | 0.0471 | 26.8  | 0.0024 | 0.6 | 0.02 | 15.4 | 0.1 | 46.7 | 12.3 | 2256.2 | 472.5 | 15.4 | 0.1 | NA |
| Spot 139 | 392  | 1191 | 0.7 | 7.9564  | 7.4  | 0.0377 | 8.3   | 0.0024 | 0.6 | 0.07 | 15.5 | 0.1 | 37.5 | 3.1  | 1861.1 | 149.7 | 15.5 | 0.1 | NA |
| Spot 4   | 362  | 1074 | 1.0 | 7.7064  | 8.8  | 0.0387 | 9.5   | 0.0024 | 0.5 | 0.05 | 15.5 | 0.1 | 38.5 | 3.6  | 1907.6 | 170.2 | 15.5 | 0.1 | NA |
| Spot 107 | 344  | 725  | 0.7 | 8.3439  | 8.0  | 0.0333 | 10.0  | 0.0024 | 0.6 | 0.06 | 15.5 | 0.1 | 33.2 | 3.3  | 1629.8 | 185.5 | 15.5 | 0.1 | NA |
| Spot 118 | 235  | 297  | 0.9 | 5.3851  | 12.2 | 0.0468 | 29.2  | 0.0024 | 0.6 | 0.02 | 15.5 | 0.1 | 46.4 | 13.3 | 2239.7 | 517.3 | 15.5 | 0.1 | NA |
| Spot 110 | 211  | 562  | 0.8 | 6.4464  | 12.3 | 0.0434 | 16.0  | 0.0024 | 0.6 | 0.04 | 15.5 | 0.1 | 43.1 | 6.8  | 2109.5 | 282.9 | 15.5 | 0.1 | NA |
| Spot 46  | 173  | 462  | 1.7 | 5.2368  | 12.9 | 0.0541 | 17.7  | 0.0024 | 0.7 | 0.04 | 15.5 | 0.1 | 53.5 | 9.2  | 2488.6 | 300.7 | 15.5 | 0.1 | NA |
| Spot 65  | 181  | 437  | 0.7 | 6.0296  | 10.3 | 0.0450 | 18.8  | 0.0024 | 0.5 | 0.02 | 15.5 | 0.1 | 44.7 | 8.2  | 2170.4 | 330.7 | 15.5 | 0.1 | NA |
| Spot 63  | 581  | 1212 | 0.6 | 10.4010 | 5.6  | 0.0281 | 12.6  | 0.0024 | 0.6 | 0.05 | 15.5 | 0.1 | 28.1 | 3.5  | 1299.8 | 245.3 | 15.5 | 0.1 | NA |
| Spot 25  | 319  | 739  | 0.9 | 8.4741  | 8.7  | 0.0330 | 17.0  | 0.0024 | 0.4 | 0.03 | 15.6 | 0.1 | 33.0 | 5.5  | 1605.0 | 319.7 | 15.6 | 0.1 | NA |
| Spot 70  | 129  | 358  | 0.8 | 5.2802  | 18.0 | 0.0511 | 24.0  | 0.0024 | 0.6 | 0.02 | 15.6 | 0.1 | 50.6 | 11.8 | 2381.7 | 414.6 | 15.6 | 0.1 | NA |
| Spot 9   | 660  | 872  | 0.5 | 9.8120  | 6.7  | 0.0286 | 12.3  | 0.0024 | 0.5 | 0.04 | 15.6 | 0.1 | 28.6 | 3.5  | 1326.1 | 239.2 | 15.6 | 0.1 | NA |
| Spot 141 | 508  | 1134 | 0.7 | 11.5959 | 6.8  | 0.0245 | 11.3  | 0.0024 | 0.5 | 0.04 | 15.6 | 0.1 | 24.6 | 2.8  | 1022.2 | 230.1 | 15.6 | 0.1 | NA |
| Spot 31  | 309  | 742  | 0.8 | 7.2541  | 9.5  | 0.0400 | 13.4  | 0.0024 | 0.4 | 0.03 | 15.6 | 0.1 | 39.8 | 5.2  | 1946.4 | 240.0 | 15.6 | 0.1 | NA |
| Spot 144 | 256  | 756  | 0.5 | 5.7210  | 11.4 | 0.0528 | 12.8  | 0.0024 | 0.6 | 0.05 | 15.7 | 0.1 | 52.2 | 6.5  | 2427.9 | 217.6 | 15.7 | 0.1 | NA |
| Spot 128 | 729  | 2006 | 0.6 | 12.0467 | 5.4  | 0.0253 | 7.9   | 0.0024 | 0.6 | 0.08 | 15.7 | 0.1 | 25.4 | 2.0  | 1081.0 | 158.7 | 15.7 | 0.1 | NA |
| Spot 140 | 436  | 1261 | 1.4 | 10.8862 | 7.7  | 0.0269 | 10.5  | 0.0024 | 0.6 | 0.05 | 15.7 | 0.1 | 27.0 | 2.8  | 1203.6 | 207.7 | 15.7 | 0.1 | NA |
| Spot 122 | 327  | 883  | 0.9 | 7.5541  | 9.9  | 0.0390 | 15.1  | 0.0024 | 0.6 | 0.04 | 15.7 | 0.1 | 38.9 | 5.7  | 1901.1 | 271.9 | 15.7 | 0.1 | NA |
| Spot 100 | 71   | 174  | 0.7 | 4.8810  | 20.4 | 0.0431 | 28.7  | 0.0024 | 0.6 | 0.02 | 15.7 | 0.1 | 42.8 | 12.0 | 2073.1 | 517.0 | 15.7 | 0.1 | NA |
| Spot 95  | 612  | 1489 | 0.7 | 11.3249 | 5.1  | 0.0264 | 9.0   | 0.0024 | 0.7 | 0.07 | 15.7 | 0.1 | 26.4 | 2.4  | 1158.3 | 178.9 | 15.7 | 0.1 | NA |
| Spot 123 | 318  | 655  | 1.0 | 7.9538  | 10.2 | 0.0351 | 19.9  | 0.0024 | 0.5 | 0.02 | 15.7 | 0.1 | 35.0 | 6.9  | 1700.1 | 370.4 | 15.7 | 0.1 | NA |
| Spot 130 | 1062 | 3027 | 0.4 | 14.0482 | 3.4  | 0.0223 | 5.2   | 0.0024 | 0.6 | 0.11 | 15.7 | 0.1 | 22.4 | 1.2  | 807.7  | 108.3 | 15.7 | 0.1 | NA |
| Spot 106 | 264  | 639  | 0.7 | 6.8776  | 9.8  | 0.0418 | 11.8  | 0.0024 | 0.6 | 0.05 | 15.8 | 0.1 | 41.6 | 4.8  | 2012.6 | 209.9 | 15.8 | 0.1 | NA |
| Spot 104 | 98   | 282  | 0.5 | 4.2847  | 20.7 | 0.0639 | 25.5  | 0.0024 | 0.6 | 0.02 | 15.8 | 0.1 | 62.9 | 15.5 | 2738.1 | 426.8 | 15.8 | 0.1 | NA |
| Spot 103 | 171  | 426  | 0.6 | 6.3242  | 11.6 | 0.0427 | 21.8  | 0.0025 | 0.6 | 0.03 | 15.8 | 0.1 | 42.5 | 9.1  | 2047.4 | 389.8 | 15.8 | 0.1 | NA |
| Spot 85  | 451  | 1126 | 0.9 | 7.6525  | 8.6  | 0.0400 | 9.9   | 0.0025 | 0.7 | 0.07 | 15.8 | 0.1 | 39.8 | 3.9  | 1931.0 | 177.2 | 15.8 | 0.1 | NA |
| Spot 68  | 318  | 840  | 0.6 | 7.8413  | 11.8 | 0.0376 | 18.0  | 0.0025 | 0.5 | 0.03 | 15.8 | 0.1 | 37.5 | 6.6  | 1817.3 | 329.6 | 15.8 | 0.1 | NA |
| Spot 149 | 246  | 694  | 0.7 | 6.8094  | 9.5  | 0.0431 | 10.8  | 0.0025 | 0.6 | 0.05 | 15.8 | 0.1 | 42.8 | 4.5  | 2060.0 | 191.3 | 15.8 | 0.1 | NA |
| Spot 89  | 465  | 1267 | 1.0 | 10.1307 | 7.4  | 0.0296 | 9.6   | 0.0025 | 0.5 | 0.05 | 15.8 | 0.1 | 29.6 | 2.8  | 1367.1 | 185.7 | 15.8 | 0.1 | NA |
| Spot 94  | 808  | 1983 | 0.7 | 12.2072 | 6.1  | 0.0252 | 8.2   | 0.0025 | 0.6 | 0.07 | 15.8 | 0.1 | 25.3 | 2.1  | 1053.0 | 166.0 | 15.8 | 0.1 | NA |
| Spot 93  | 287  | 633  | 1.9 | 7.7276  | 9.5  | 0.0364 | 18.7  | 0.0025 | 0.6 | 0.03 | 15.8 | 0.1 | 36.3 | 6.7  | 1755.6 | 345.9 | 15.8 | 0.1 | NA |
| Spot 135 | 360  | 918  | 0.7 | 7.9419  | 8.8  | 0.0376 | 12.5  | 0.0025 | 0.7 | 0.06 | 15.9 | 0.1 | 37.4 | 4.6  | 1809.6 | 228.3 | 15.9 | 0.1 | NA |
| Spot 43  | 330  | 828  | 0.7 | 7.8742  | 10.1 | 0.0375 | 11.3  | 0.0025 | 0.6 | 0.05 | 15.9 | 0.1 | 37.3 | 4.1  | 1803.0 | 205.4 | 15.9 | 0.1 | NA |
| Spot 14  | 362  | 793  | 0.7 | 8.2242  | 9.2  | 0.0353 | 15.2  | 0.0025 | 0.6 | 0.04 | 15.9 | 0.1 | 35.2 | 5.3  | 1694.6 | 282.2 | 15.9 | 0.1 | NA |
| Spot 16  | 96   | 268  | 0.7 | 4.8344  | 21.7 | 0.0540 | 33.3  | 0.0025 | 0.6 | 0.02 | 15.9 | 0.1 | 53.4 | 17.4 | 2443.0 | 582.7 | 15.9 | 0.1 | NA |
| Spot 18  | 151  | 387  | 0.8 | 5.0322  | 12.9 | 0.0565 | 13.8  | 0.0025 | 0.6 | 0.04 | 15.9 | 0.1 | 55.8 | 7.5  | 2514.2 | 233.8 | 15.9 | 0.1 | NA |
| Spot 66  | 239  | 216  | 1.5 | 5.5531  | 10.5 | 0.0401 | 20.4  | 0.0025 | 0.6 | 0.03 | 15.9 | 0.1 | 40.0 | 8.0  | 1920.1 | 369.7 | 15.9 | 0.1 | NA |
| Spot 136 | 470  | 1027 | 0.6 | 10.4568 | 6.7  | 0.0279 | 9.0   | 0.0025 | 0.6 | 0.07 | 16.0 | 0.1 | 27.9 | 2.5  | 1233.6 | 176.6 | 16.0 | 0.1 | NA |
| Spot 28  | 82   | 229  | 0.9 | 4.2053  | 24.4 | 0.0629 | 27.0  | 0.0025 | 0.6 | 0.02 | 16.0 | 0.1 | 62.0 | 16.3 | 2686.9 | 456.5 | 16.0 | 0.1 | NA |
| Spot 13  | 39   | 116  | 0.7 | 3.2766  | 21.1 | 0.0695 | 34.5  | 0.0025 | 0.8 | 0.02 | 16.0 | 0.1 | 68.2 | 22.7 | 2845.1 | 581.2 | 16.0 | 0.1 | NA |
| Spot 60  | 201  | 248  | 0.7 | 5.0515  | 11.3 | 0.0500 | 33.4  | 0.0025 | 0.6 | 0.02 | 16.0 | 0.1 | 49.5 | 16.1 | 2292.3 | 592.0 | 16.0 | 0.1 | NA |
| Spot 8   | 471  | 1034 | 1.7 | 10.3807 | 8.3  | 0.0285 | 10.7  | 0.0025 | 0.7 | 0.07 | 16.2 | 0.1 | 28.5 | 3.0  | 1254.2 | 209.0 | 16.2 | 0.1 | NA |
| Spot 78  | 103  | 322  | 0.6 | 5.8783  | 17.3 | 0.0448 | 35.3  | 0.0025 | 0.6 | 0.02 | 16.2 | 0.1 | 44.5 | 15.4 | 2079.4 | 643.1 | 16.2 | 0.1 | NA |
| Spot 61  | 97   | 308  | 0.5 | 4.5715  | 18.3 | 0.0621 | 23.0  | 0.0025 | 0.5 | 0.02 | 16.3 | 0.1 | 61.1 | 13.6 | 2637.0 | 386.8 | 16.3 | 0.1 | NA |
| Spot 56  | 89   | 66   | 0.7 | 4.0607  | 12.0 | 0.0039 | 827.6 | 0.0025 | 0.6 | 0.00 | 16.3 | 0.1 | 3.9  | 32.6 | NA     | NA    | 16.3 | 0.1 | NA |
| Spot 6   | 361  | 149  | 0.6 | 6.0007  | 8.0  | 0.0244 | 24.5  | 0.0025 | 0.9 | 0.04 | 16.4 | 0.1 | 24.5 | 5    |        |       |      |     |    |

|         |      |      |     |         |         |         |        |        |      |      |      |     |      |     |       |       |      |     |    |
|---------|------|------|-----|---------|---------|---------|--------|--------|------|------|------|-----|------|-----|-------|-------|------|-----|----|
| Spot 4  | 106  | 1001 | 0.7 | -1.7053 | -1696.8 | -0.2037 | 1696.9 | 0.0024 | 20.5 | 0.01 | 15.6 | 3.2 | NA   | NA  | NA    | NA    | 15.6 | 3.2 | NA |
| Spot 13 | 1140 | 1548 | 0.7 | 14.3568 | 27.9    | 0.0206  | 29.6   | 0.0025 | 4.4  | 0.15 | 16.0 | 0.7 | 20.7 | 6.1 | 607.1 | 645.2 | 16.0 | 0.7 | NA |
| Spot 11 | 247  | 677  | 0.4 | 12.5362 | 42.9    | 0.0207  | 47.0   | 0.0026 | 6.6  | 0.14 | 16.6 | 1.1 | 20.8 | 9.7 | 532.8 | NA    | 16.6 | 1.1 | NA |

## MR19DV-3

|         |     |        |     |         |       |        |       |        |      |      |        |      |        |       |        |       |      |     |     |
|---------|-----|--------|-----|---------|-------|--------|-------|--------|------|------|--------|------|--------|-------|--------|-------|------|-----|-----|
| Spot 15 | 497 | 14273  | 1.5 | 21.0341 | 4.7   | 0.0326 | 5.7   | 0.0051 | 3.2  | 0.55 | 32.8   | 1.0  | 32.5   | 1.8   | 15.6   | NA    | 32.8 | 1.0 | NA  |
| Spot 18 | 391 | 10554  | 1.9 | 24.1264 | 16.9  | 0.0281 | 17.7  | 0.0051 | 5.2  | 0.29 | 32.8   | 1.7  | 28.1   | 4.9   | NA     | NA    | 32.8 | 1.7 | NA  |
| Spot 2  | 504 | 14350  | 1.6 | 21.5197 | 15.0  | 0.0322 | 15.4  | 0.0052 | 3.3  | 0.21 | 33.2   | 1.1  | 32.2   | 4.9   | NA     | NA    | 33.2 | 1.1 | NA  |
| Spot 5  | 329 | 8528   | 1.7 | 20.6327 | 15.2  | 0.0331 | 15.5  | 0.0052 | 2.6  | 0.17 | 33.2   | 0.9  | 33.1   | 5.0   | 28.1   | NA    | 33.2 | 0.9 | NA  |
| Spot 12 | 422 | 6718   | 2.6 | 19.8003 | 10.8  | 0.0343 | 11.4  | 0.0052 | 3.4  | 0.30 | 33.3   | 1.1  | 34.3   | 3.8   | 105.3  | NA    | 33.3 | 1.1 | NA  |
| Spot 10 | 178 | 3166   | 2.3 | 23.4334 | 38.9  | 0.0270 | 39.4  | 0.0052 | 4.4  | 0.11 | 33.3   | 1.5  | 27.1   | 10.5  | NA     | NA    | 33.3 | 1.5 | NA  |
| Spot 14 | 174 | 5593   | 2.0 | 16.9824 | 29.4  | 0.0401 | 31.7  | 0.0052 | 11.5 | 0.36 | 33.4   | 3.8  | 39.9   | 12.4  | 454.7  | NA    | 33.4 | 3.8 | NA  |
| Spot 7  | 285 | 12968  | 1.6 | 23.8744 | 21.4  | 0.0291 | 22.1  | 0.0052 | 5.6  | 0.25 | 33.5   | 1.9  | 29.2   | 6.4   | NA     | NA    | 33.5 | 1.9 | NA  |
| Spot 19 | 324 | 8385   | 1.9 | 20.6741 | 15.6  | 0.0338 | 16.2  | 0.0053 | 4.0  | 0.25 | 33.9   | 1.4  | 33.7   | 5.4   | 23.0   | NA    | 33.9 | 1.4 | NA  |
| Spot 3  | 106 | 2615   | 1.7 | 26.4406 | 79.0  | 0.0233 | 80.2  | 0.0053 | 11.3 | 0.14 | 34.0   | 3.8  | 23.4   | 18.5  | NA     | NA    | 34.0 | 3.8 | NA  |
| Spot 22 | 277 | 4678   | 2.2 | 23.1362 | 25.5  | 0.0292 | 25.8  | 0.0053 | 2.7  | 0.10 | 34.1   | 0.9  | 29.2   | 7.4   | NA     | NA    | 34.1 | 0.9 | NA  |
| Spot 8  | 316 | 8407   | 2.3 | 31.7330 | 35.1  | 0.0218 | 35.3  | 0.0053 | 2.7  | 0.08 | 34.3   | 0.9  | 21.9   | 7.6   | NA     | NA    | 34.3 | 0.9 | NA  |
| Spot 16 | 436 | 24045  | 1.6 | 22.4681 | 8.2   | 0.0323 | 8.5   | 0.0054 | 2.1  | 0.25 | 34.4   | 0.7  | 32.3   | 2.7   | NA     | NA    | 34.4 | 0.7 | NA  |
| Spot 6  | 167 | 5161   | 1.0 | 9.7579  | 423.9 | 0.0736 | 424.0 | 0.0054 | 8.5  | 0.02 | 34.5   | 2.9  | 72.1   | 303.7 | 1614.7 | NA    | 34.5 | 2.9 | NA  |
| Spot 9  | 199 | 610    | 2.0 | 12.3052 | 14.4  | 0.0423 | 15.6  | 0.0054 | 3.1  | 0.20 | 34.5   | 1.1  | 42.0   | 6.4   | 497.0  | 338.5 | 34.5 | 1.1 | NA  |
| Spot 23 | 349 | 5817   | 2.6 | 21.0583 | 22.8  | 0.0332 | 23.2  | 0.0054 | 3.8  | 0.16 | 34.5   | 1.3  | 33.1   | 7.6   | NA     | NA    | 34.5 | 1.3 | NA  |
| Spot 4  | 466 | 1939   | 2.0 | 16.3936 | 8.5   | 0.0394 | 11.3  | 0.0054 | 2.3  | 0.20 | 34.5   | 0.8  | 39.3   | 4.4   | 339.5  | 251.6 | 34.5 | 0.8 | NA  |
| Spot 1  | 515 | 6597   | 1.9 | 21.2186 | 13.8  | 0.0331 | 14.4  | 0.0054 | 3.4  | 0.24 | 34.5   | 1.2  | 33.1   | 4.7   | NA     | NA    | 34.5 | 1.2 | NA  |
| Spot 11 | 798 | 4653   | 1.2 | 19.3487 | 4.4   | 0.0359 | 5.3   | 0.0054 | 1.8  | 0.34 | 34.6   | 0.6  | 35.8   | 1.9   | 114.3  | NA    | 34.6 | 0.6 | NA  |
| Spot 1C | 421 | 12358  | 1.5 | 23.6105 | 17.1  | 0.0306 | 19.7  | 0.0054 | 9.7  | 0.49 | 34.8   | 3.4  | 30.6   | 5.9   | NA     | NA    | 34.8 | 3.4 | NA  |
| Spot 13 | 341 | 8805   | 1.7 | 20.3352 | 13.1  | 0.0355 | 13.6  | 0.0054 | 3.3  | 0.24 | 35.0   | 1.2  | 35.5   | 4.7   | 65.3   | NA    | 35.0 | 1.2 | NA  |
| Spot 17 | 238 | 18180  | 2.5 | 22.1062 | 19.5  | 0.0749 | 19.9  | 0.0123 | 3.8  | 0.19 | 78.6   | 3.0  | 73.3   | 14.1  | NA     | NA    | 78.6 | 3.0 | NA  |
| Spot 20 | 114 | 127467 | 0.9 | 8.4558  | 0.2   | 5.7418 | 0.7   | 0.3533 | 0.7  | 0.95 | 1950.5 | 11.5 | 1937.7 | 6.2   | 1924.0 | 4.1   | 1924 | 4.1 | 101 |
| Spot 21 | 127 | 430532 | 1.1 | 8.4474  | 0.3   | 5.6892 | 0.6   | 0.3495 | 0.5  | 0.85 | 1932.4 | 7.9  | 1929.7 | 4.8   | 1926.9 | 5.3   | 1927 | 5.3 | 100 |

## MR19DV-4

|          |      |      |     |         |      |        |      |        |     |      |      |     |       |      |        |       |      |     |    |
|----------|------|------|-----|---------|------|--------|------|--------|-----|------|------|-----|-------|------|--------|-------|------|-----|----|
| Spot 32  | 277  | 514  | 0.4 | 5.4700  | 12.6 | 0.0735 | 17.4 | 0.0034 | 0.6 | 0.03 | 21.6 | 0.1 | 72.0  | 12.1 | 2443.9 | 296.8 | 21.6 | 0.1 | NA |
| Spot 1   | 225  | 465  | 0.8 | 4.2818  | 15.9 | 0.0985 | 17.3 | 0.0034 | 0.6 | 0.03 | 22.1 | 0.1 | 95.4  | 15.8 | 2892.7 | 283.1 | 22.1 | 0.1 | NA |
| Spot 30  | 101  | 267  | 0.9 | 5.3269  | 21.4 | 0.0663 | 26.5 | 0.0035 | 0.5 | 0.02 | 22.2 | 0.1 | 65.2  | 16.7 | 2220.0 | 467.4 | 22.2 | 0.1 | NA |
| Spot 60  | 144  | 278  | 1.0 | 5.0006  | 20.6 | 0.0734 | 35.2 | 0.0035 | 0.8 | 0.02 | 22.3 | 0.2 | 71.9  | 24.4 | 2389.9 | 620.2 | 22.3 | 0.2 | NA |
| Spot 46  | 387  | 717  | 0.7 | 6.9613  | 10.7 | 0.0616 | 11.4 | 0.0036 | 0.7 | 0.06 | 22.9 | 0.2 | 60.7  | 6.7  | 2033.7 | 201.8 | 22.9 | 0.2 | NA |
| Spot 99  | 427  | 719  | 1.3 | 7.5834  | 9.4  | 0.0555 | 13.8 | 0.0036 | 0.6 | 0.05 | 22.9 | 0.1 | 54.8  | 7.4  | 1847.0 | 251.1 | 22.9 | 0.1 | NA |
| Spot 53  | 240  | 462  | 0.7 | 5.3094  | 12.1 | 0.0806 | 14.5 | 0.0036 | 0.6 | 0.04 | 23.3 | 0.1 | 78.7  | 11.0 | 2468.1 | 245.4 | 23.3 | 0.1 | NA |
| Spot 3   | 537  | 938  | 0.6 | 7.8024  | 8.7  | 0.0573 | 13.8 | 0.0036 | 0.6 | 0.05 | 23.5 | 0.1 | 56.5  | 7.6  | 1861.1 | 249.9 | 23.5 | 0.1 | NA |
| Spot 102 | 1565 | 2944 | 0.7 | 12.4316 | 6.0  | 0.0382 | 6.2  | 0.0037 | 0.7 | 0.11 | 23.6 | 0.2 | 38.0  | 2.3  | 1082.8 | 123.7 | 23.6 | 0.2 | NA |
| Spot 91  | 521  | 1132 | 0.6 | 9.5249  | 8.9  | 0.0472 | 9.6  | 0.0037 | 0.5 | 0.05 | 23.7 | 0.1 | 46.8  | 4.4  | 1483.9 | 182.9 | 23.7 | 0.1 | NA |
| Spot 28  | 747  | 1182 | 0.8 | 8.8305  | 7.7  | 0.0523 | 8.5  | 0.0037 | 0.6 | 0.07 | 23.9 | 0.1 | 51.8  | 4.3  | 1661.0 | 156.6 | 23.9 | 0.1 | NA |
| Spot 13  | 251  | 497  | 1.1 | 5.1370  | 14.0 | 0.0873 | 19.8 | 0.0037 | 0.6 | 0.03 | 24.0 | 0.2 | 85.0  | 16.1 | 2558.1 | 334.5 | 24.0 | 0.2 | NA |
| Spot 119 | 151  | 254  | 0.9 | 3.5975  | 16.2 | 0.1199 | 17.6 | 0.0037 | 0.6 | 0.03 | 24.0 | 0.1 | 115.0 | 19.1 | 3074.0 | 283.6 | 24.0 | 0.1 | NA |
| Spot 64  | 133  | 246  | 1.7 | 4.7500  | 24.3 | 0.0821 | 28.3 | 0.0038 | 0.6 | 0.02 | 24.1 | 0.1 | 80.2  | 21.8 | 2443.1 | 489.9 | 24.1 | 0.1 | NA |
| Spot 4   | 236  | 423  | 0.7 | 5.9125  | 15.1 | 0.0717 | 26.9 | 0.0038 | 0.5 | 0.02 | 24.2 | 0.1 | 70.3  | 18.2 | 2206.6 | 475.5 | 24.2 | 0.1 | NA |
| Spot 79  | 2372 | 4674 | 0.8 | 15.6731 | 3.6  | 0.0315 | 6.1  | 0.0038 | 0.5 | 0.09 | 24.2 | 0.1 | 31.5  | 1.9  | 632.6  | 130.4 | 24.2 | 0.1 | NA |
| Spot 45  | 1509 | 2925 | 1.5 | 13.3643 | 4.4  | 0.0363 | 5.7  | 0.0038 | 0.9 | 0.15 | 24.2 | 0.2 | 36.2  | 2.0  | 930.6  | 115.4 | 24.2 | 0.2 | NA |
| Spot 66  | 998  | 1649 | 0.6 | 12.1580 | 5.5  | 0.0382 | 11.1 | 0.0038 | 0.6 | 0.05 | 24.2 | 0.1 | 38.0  | 4.1  | 1028.1 | 224.0 | 24.2 | 0.1 | NA |
| Spot 48  | 3980 | 6799 | 0.5 | 16.4453 | 2.8  | 0.0305 | 3.2  | 0.0038 | 0.6 | 0.18 | 24.2 | 0.1 | 30.5  | 1.0  | 559.6  | 67.9  | 24.2 | 0.1 | NA |
| Spot 114 | 873  | 1700 | 1.0 | 10.2592 | 8.2  | 0.0463 | 10.1 | 0.0038 | 0.5 | 0.05 | 24.3 | 0.1 | 46.0  | 4.6  | 1407.1 | 194.1 | 24.3 | 0.1 | NA |
| Spot 12  | 2081 | 2287 | 1.1 | 13.6841 | 3.5  | 0.0348 | 7.0  | 0.0038 | 0.8 | 0.11 | 24.3 | 0.2 | 34.8  | 2.4  | 835.6  | 145.1 | 24.3 | 0.2 | NA |
| Spot 100 | 810  | 1510 | 1.5 | 10.8521 | 6.2  | 0.0431 | 6.9  | 0.0038 | 0.6 | 0.09 | 24.3 | 0.1 | 42.8  | 2.9  | 1262.9 | 133.9 | 24.3 | 0.1 | NA |
| Spot 71  | 3169 | 4888 | 0.9 | 16.5880 | 2.3  | 0.0299 | 5.2  | 0.0038 | 0.5 | 0.10 | 24.3 | 0.1 | 29.9  | 1.5  | 503.7  | 114.4 | 24.3 | 0.1 | NA |
| Spot 23  | 1545 | 2886 | 0.9 | 13.4034 | 5.0  | 0.0365 | 5.7  | 0.0038 | 0.6 | 0.10 | 24.4 | 0.1 | 36.4  | 2.0  | 924.2  | 116.0 | 24.4 | 0.1 | NA |
| Spot 85  | 735  | 1394 | 0.6 | 9.5326  | 8.3  | 0.0498 | 12.4 | 0.0038 | 0.7 | 0.05 | 24.4 | 0.2 | 49.3  | 6.0  | 1530.5 | 233.9 | 24.4 | 0.2 | NA |
| Spot 29  | 1762 | 3481 | 0.8 | 14.2977 | 3.6  | 0.0346 | 4.6  | 0.0038 | 0.6 | 0.13 | 24.4 | 0.2 | 34.6  | 1.6  | 810.3  | 95.7  | 24.4 | 0.2 | NA |
| Spot 117 | 638  | 760  | 1.0 | 8.3170  | 7.8  | 0.0535 | 14.4 | 0.0038 | 0.6 | 0.04 | 24.4 | 0.1 | 52.9  | 7.4  | 1661.3 | 266.9 | 24.4 | 0.1 | NA |
| Spot 43  | 324  | 615  | 1.2 | 5.6040  | 13.1 | 0.0830 | 13.6 | 0.0038 | 0.6 | 0.04 | 24.4 | 0.1 | 80.9  | 10.6 | 2438.0 | 230.9 | 24.4 | 0.1 | NA |
| Spot 9   | 1348 | 2662 | 0.7 | 13.5968 | 5.3  | 0.0358 | 9.5  | 0.0038 | 0.6 | 0.07 | 24.5 | 0.2 | 35.7  | 3.3  | 876.1  | 196.2 | 24.5 | 0.2 | NA |
| Spot 44  | 1974 | 3918 | 0.8 | 13.8128 | 3.6  | 0.0362 | 4.5  | 0.0038 | 0.6 | 0.13 | 24.5 | 0.1 | 36.1  | 1.6  | 896.5  | 92.5  | 24.5 | 0.1 | NA |
| Spot 27  | 1044 | 1809 | 0.8 | 11.5392 | 5.8  | 0.0417 | 7.0  | 0.0038 | 0.5 | 0.07 | 24.5 | 0.1 | 41.4  | 2.8  | 1177.5 | 137.8 | 24.5 | 0.1 | NA |
| Spot 62  | 1293 | 2601 | 1.0 | 12.0132 | 4.6  | 0.0409 | 5.1  | 0.0038 | 0.7 | 0.14 | 24.6 | 0.2 | 40.7  | 2.0  | 1139.1 | 99.7  | 24.6 | 0.2 | NA |
| Spot 73  | 473  | 744  | 0.6 | 7.5180  | 8.8  | 0.0605 | 10.9 | 0.0038 | 0.7 | 0.06 | 24.6 | 0.2 | 59.7  | 6.3  | 1879.7 | 197.4 | 24.6 | 0.2 | NA |
| Spot 118 | 2059 | 3961 | 1.1 | 14.9131 | 4.0  | 0.0333 | 7.0  | 0.0038 | 0.6 | 0.08 | 24.6 | 0.1 | 33.3  | 2.3  | 719.2  | 147.9 | 24.6 | 0.1 | NA |
| Spot 59  | 1845 | 3615 | 0.7 | 14.4378 | 3.6  | 0.0344 | 5.1  | 0.0038 | 0.7 | 0.14 | 24.6 | 0.2 | 34.3  | 1.7  | 782.3  | 106.2 | 24.6 | 0.2 | NA |
| Spot 26  | 1340 | 2535 | 1.4 | 13.2545 | 5.0  | 0.0370 | 7.5  | 0.0038 | 0.5 | 0.07 | 24.6 | 0.1 | 36.9  | 2.7  | 932.2  | 152.9 | 24.6 | 0.1 | NA |
| Spot 105 | 688  | 1403 | 1.8 | 8.9252  | 9.7  | 0.0538 | 11.8 | 0.0038 | 0.6 | 0.05 | 24.6 | 0.2 | 53.2  | 6.1  | 1661.5 | 218.9 | 24.6 | 0.2 | NA |
| Spot 116 | 1426 | 2736 | 0.6 | 14.2067 | 3.5  | 0.0343 | 8.1  | 0.0038 | 0.6 | 0.08 | 24.6 | 0.2 | 34.3  | 2.7  | 775.4  | 170.2 | 24.6 | 0.2 | NA |
| Spot 21  | 1884 | 3080 | 1.1 | 13.7875 | 3.9  | 0.0359 | 4.3  | 0.0038 | 0.5 | 0.12 | 24.6 | 0.1 | 35.8  | 1.5  | 869.8  | 89.0  | 24.6 | 0.1 | NA |
| Spot 101 | 1599 | 3147 | 1.3 | 13.4914 | 5.3  | 0.0368 | 7.7  | 0.0038 | 0.6 | 0.08 | 24.7 | 0.2 | 36.7  | 2.8  | 913.5  | 159.1 | 24.7 | 0.2 | NA |
| Spot 115 | 1051 | 1890 | 0.7 | 12.7771 | 5.0  | 0.0374 | 7.6  | 0.0038 | 0.6 | 0.09 | 24.7 | 0.2 | 37.3  | 2.8  | 945.7  | 155.2 | 24.7 | 0.2 | NA |
| Spot 57  | 620  | 1034 | 0.7 | 8.6597  | 8.3  | 0.0542 | 10.4 | 0.0038 | 0.8 | 0.08 | 24.7 | 0.2 | 53.6  | 5.4  | 1665.3 | 191.7 | 24.7 | 0.2 | NA |
| Spot 93  | 1400 | 2544 | 1.0 | 12.3844 | 4.2  | 0.0400 | 4.5  | 0.0039 | 0.6 | 0.14 | 24.8 | 0.2 | 39.8  | 1.8  | 1076.4 | 90.2  | 24.8 | 0.2 | NA |
| Spot 80  | 2870 | 1238 | 0.7 | 14.3332 | 3.8  | 0.0309 | 15.2 | 0.0039 | 0.7 | 0.05 | 24.8 | 0.2 | 30.9  | 4.6  | 533.6  | 333.3 | 24.8 | 0.2 | NA |
| Spot 47  | 1585 | 3319 | 1.5 | 14.2213 | 3.9  | 0.0352 | 4.9  | 0.0039 | 0.6 | 0.12 | 24.8 | 0.1 | 35.1  | 1.7  | 810.1  | 101.0 | 24.8 | 0.1 | NA |
| Spot 37  | 1575 | 3371 | 1.0 | 13.8248 | 4.9  | 0.0364 | 5.6  | 0.0039 | 0.5 | 0.09 | 24.8 | 0.1 | 36.3  | 2.0  | 880.1  | 115.6 | 24.8 | 0.1 | NA |
| Spot 108 | 1621 | 3285 | 1.0 | 14.8902 | 4.5  | 0.0334 | 8.0  | 0.0039 | 0.6 | 0.08 | 24.9 | 0.2 | 33.3  | 2.6  | 696.4  | 170.0 | 24.9 | 0.2 | NA |
| Spot 34  | 1649 | 3284 | 0.8 | 13.4955 | 4.6  | 0.0373 | 6.3  | 0.0039 | 0.7 | 0.11 | 24.9 | 0.2 | 37.2  | 2.3  | 929.8  | 129.1 | 24.9 | 0.2 | NA |
| Spot 78  | 533  | 885  | 0.5 | 9.5904  | 7.0  | 0.0472 | 13.7 | 0.0039 | 0.7 | 0.05 | 24.9 | 0.2 | 46.8  | 6.2  | 1394.9 | 262.7 | 24.9 | 0.2 | NA |
| Spot 97  | 1987 | 4513 | 1.3 | 15.2565 | 3.8  | 0.0333 | 5.1  | 0.0039 | 0.6 | 0.11 | 24.9 | 0.1 | 33.2  | 1.7  | 688.5  | 108.8 | 24.9 | 0.1 | NA |
| Spot 31  | 1399 | 2381 | 1.0 | 12.2012 | 5.0  | 0.0407 | 5.7  | 0.0039 | 0.5 | 0.09 | 24.9 | 0.1 | 40.5  | 2.3  | 1104.5 | 114.5 | 24.9 | 0.1 | NA |
| Spot 33  | 1117 | 2068 | 0.6 | 11.6701 | 5.5  | 0.0422 | 6.5  | 0.0039 | 0.6 | 0.10 | 24.9 | 0.2 | 42.0  | 2.7  | 1177.5 | 127.8 | 24.9 | 0.2 | NA |
| Spot 17  | 3237 | 5890 | 0.9 | 17.6005 | 2.1  | 0.0291 | 3.2  | 0.0039 | 0.5 | 0.16 | 24.9 | 0.1 | 29.1  | 0.9  | 391.5  | 70.3  | 24.9 | 0.1 | NA |
| Spot 86  | 1091 | 2046 | 0.9 | 10.7079 | 7.0  | 0.0463 | 7.5  | 0.0039 | 0.7 | 0.09 | 24.9 | 0.2 | 45.9  | 3.4  | 1353.6 | 144.1 | 24.9 | 0.2 | NA |
| Spot 24  | 2204 | 3768 | 0.8 | 15.6307 | 3.2  | 0.0323 | 3.9  | 0.0039 | 0.5 | 0.14 | 24.9 | 0.1 | 32.3  | 1.2  | 618.6  | 82.8  | 24.9 | 0.1 | NA |
| Spot 77  | 3575 | 7029 | 1.1 | 18.0834 | 2.4  | 0.0285 | 2.7  | 0.0039 | 0.6 | 0.22 | 24.9 | 0.2 | 28.5  | 0.8  | 340.3  | 60.5  | 24.9 | 0.2 | NA |
| Spot 40  | 1206 | 2311 | 0.7 | 12.5317 | 5.4  | 0.0397 | 6.2  | 0.0039 | 0.5 | 0.08 | 25.1 | 0.1 | 39.5  | 2.4  | 1038.1 | 124.4 | 25.1 | 0.1 | NA |
| Spot 110 | 1671 | 3158 | 0.9 | 13.6222 | 4.5  | 0.0369 | 5.1  | 0.0039 | 1.0 | 0.20 | 25.1 | 0.3 | 36.8  | 1.8  | 892.0  | 102.6 | 25.1 | 0.3 | NA |
| Spot 75  | 1492 | 3023 | 0.8 | 13.5623 | 4.1  | 0.0371 | 8.0  | 0.0039 | 0.6 | 0.07 | 25.1 | 0.1 | 37.0  | 2.9  | 900.3  | 165.3 | 25.1 | 0.1 | NA |
| Spot 95  | 4353 | 8468 | 1.0 | 18.2481 | 1.7  | 0.0286 | 2.0  | 0.0039 | 0.6 | 0.30 | 25.1 | 0.1 | 28.6  | 0.6  | 334.7  | 43.0  | 25.1 | 0.1 | NA |
| Spot 81  | 2381 | 4533 | 1.0 | 15.4799 | 2.5  | 0.0331 | 3.7  | 0.0039 | 0.6 | 0.17 | 25.1 | 0.2 | 33.1  | 1.2  | 657.3  | 78.0  | 25.1 | 0.2 | NA |
| Spot 72  | 581  | 1034 | 0.7 | 7.9980  | 8.7  | 0.0604 | 9.8  | 0.0039 | 0.6 | 0.06 | 25.2 | 0.1 | 59.5  | 5.7  | 1831.2 | 177.5 | 25.2 | 0.1 | NA |
| Spot 50  | 2944 | 5830 | 0.7 | 16.5977 | 2.6  | 0.0312 | 3.4  | 0.0039 | 0.7 | 0.19 | 25.2 | 0.2 | 31.2  | 1.0  | 523.0  | 73.4  | 25.2 | 0.2 | NA |

|          |      |       |     |         |      |        |      |        |     |      |        |      |        |      |        |       |      |      |    |
|----------|------|-------|-----|---------|------|--------|------|--------|-----|------|--------|------|--------|------|--------|-------|------|------|----|
| Spot 6   | 424  | 910   | 1.0 | 6.6746  | 11.2 | 0.0732 | 12.0 | 0.0039 | 0.6 | 0.05 | 25.2   | 0.2  | 71.7   | 8.3  | 2170.2 | 210.1 | 25.2 | 0.2  | NA |
| Spot 25  | 795  | 1431  | 0.7 | 11.1890 | 6.1  | 0.0431 | 11.9 | 0.0039 | 0.6 | 0.05 | 25.2   | 0.2  | 42.9   | 5.0  | 1193.7 | 235.3 | 25.2 | 0.2  | NA |
| Spot 39  | 285  | 559   | 0.8 | 5.0566  | 9.9  | 0.0952 | 13.1 | 0.0039 | 0.6 | 0.05 | 25.2   | 0.2  | 92.4   | 11.6 | 2617.9 | 219.6 | 25.2 | 0.2  | NA |
| Spot 18  | 743  | 1672  | 0.6 | 9.6637  | 8.2  | 0.0517 | 9.5  | 0.0039 | 0.7 | 0.07 | 25.2   | 0.2  | 51.1   | 4.7  | 1538.5 | 178.3 | 25.2 | 0.2  | NA |
| Spot 120 | 3215 | 5915  | 0.5 | 16.9425 | 2.4  | 0.0305 | 2.8  | 0.0039 | 0.5 | 0.19 | 25.2   | 0.1  | 30.5   | 0.8  | 470.5  | 61.4  | 25.2 | 0.1  | NA |
| Spot 16  | 1603 | 2838  | 0.7 | 13.6392 | 4.0  | 0.0371 | 5.3  | 0.0039 | 0.6 | 0.12 | 25.3   | 0.2  | 37.0   | 1.9  | 882.4  | 108.1 | 25.3 | 0.2  | NA |
| Spot 51  | 1631 | 3389  | 1.6 | 13.9841 | 4.0  | 0.0365 | 5.4  | 0.0039 | 0.7 | 0.13 | 25.3   | 0.2  | 36.4   | 1.9  | 848.5  | 112.0 | 25.3 | 0.2  | NA |
| Spot 58  | 2442 | 4433  | 0.5 | 16.3109 | 2.9  | 0.0316 | 5.6  | 0.0039 | 0.7 | 0.12 | 25.4   | 0.2  | 31.5   | 1.8  | 529.9  | 122.7 | 25.4 | 0.2  | NA |
| Spot 82  | 2283 | 4077  | 0.9 | 15.9439 | 2.7  | 0.0323 | 6.2  | 0.0039 | 0.7 | 0.11 | 25.4   | 0.2  | 32.3   | 2.0  | 576.8  | 133.1 | 25.4 | 0.2  | NA |
| Spot 41  | 1694 | 3429  | 0.6 | 15.0936 | 3.3  | 0.0339 | 6.3  | 0.0040 | 0.8 | 0.12 | 25.4   | 0.2  | 33.9   | 2.1  | 682.4  | 133.7 | 25.4 | 0.2  | NA |
| Spot 98  | 1642 | 3065  | 0.9 | 13.7162 | 3.9  | 0.0372 | 6.3  | 0.0040 | 0.6 | 0.09 | 25.5   | 0.1  | 37.1   | 2.3  | 875.7  | 129.4 | 25.5 | 0.1  | NA |
| Spot 112 | 1421 | 3079  | 0.8 | 12.7337 | 4.2  | 0.0404 | 6.5  | 0.0040 | 0.6 | 0.09 | 25.5   | 0.1  | 40.2   | 2.5  | 1035.3 | 130.3 | 25.5 | 0.1  | NA |
| Spot 74  | 1369 | 2652  | 1.1 | 14.7952 | 5.0  | 0.0341 | 8.1  | 0.0040 | 0.7 | 0.08 | 25.6   | 0.2  | 34.1   | 2.7  | 680.5  | 172.6 | 25.6 | 0.2  | NA |
| Spot 55  | 1760 | 3341  | 0.9 | 14.4329 | 4.1  | 0.0357 | 5.8  | 0.0040 | 0.6 | 0.10 | 25.6   | 0.1  | 35.6   | 2.0  | 775.2  | 120.8 | 25.6 | 0.1  | NA |
| Spot 65  | 1633 | 2585  | 1.6 | 13.1837 | 4.0  | 0.0386 | 5.6  | 0.0040 | 0.7 | 0.12 | 25.6   | 0.2  | 38.4   | 2.1  | 935.1  | 114.6 | 25.6 | 0.2  | NA |
| Spot 92  | 1981 | 4086  | 1.0 | 14.4426 | 3.7  | 0.0362 | 5.3  | 0.0040 | 0.7 | 0.14 | 25.7   | 0.2  | 36.1   | 1.9  | 799.9  | 110.7 | 25.7 | 0.2  | NA |
| Spot 103 | 263  | 604   | 2.2 | 4.8418  | 15.7 | 0.1026 | 16.5 | 0.0040 | 0.7 | 0.04 | 25.7   | 0.2  | 99.2   | 15.6 | 2709.0 | 274.5 | 25.7 | 0.2  | NA |
| Spot 94  | 1112 | 641   | 1.2 | 10.7314 | 5.4  | 0.0391 | 15.9 | 0.0040 | 0.6 | 0.04 | 25.7   | 0.1  | 38.9   | 6.1  | 954.4  | 325.9 | 25.7 | 0.1  | NA |
| Spot 38  | 1839 | 2797  | 0.6 | 14.3560 | 3.8  | 0.0357 | 4.3  | 0.0040 | 0.4 | 0.10 | 25.8   | 0.1  | 35.6   | 1.5  | 765.6  | 90.6  | 25.8 | 0.1  | NA |
| Spot 76  | 1531 | 2837  | 1.1 | 14.4658 | 3.7  | 0.0355 | 5.4  | 0.0040 | 0.6 | 0.10 | 25.9   | 0.1  | 35.4   | 1.9  | 744.8  | 112.9 | 25.9 | 0.1  | NA |
| Spot 61  | 2110 | 3801  | 0.6 | 15.7280 | 3.6  | 0.0331 | 5.1  | 0.0040 | 0.7 | 0.13 | 25.9   | 0.2  | 33.1   | 1.7  | 594.0  | 109.0 | 25.9 | 0.2  | NA |
| Spot 42  | 1186 | 1784  | 0.4 | 13.1299 | 5.3  | 0.0380 | 10.6 | 0.0040 | 0.6 | 0.06 | 26.0   | 0.2  | 37.9   | 3.9  | 878.8  | 219.8 | 26.0 | 0.2  | NA |
| Spot 90  | 543  | 1088  | 0.8 | 7.8295  | 9.4  | 0.0644 | 13.5 | 0.0040 | 0.5 | 0.04 | 26.0   | 0.1  | 63.3   | 8.3  | 1887.1 | 243.3 | 26.0 | 0.1  | NA |
| Spot 56  | 637  | 826   | 0.8 | 9.1083  | 7.3  | 0.0519 | 12.5 | 0.0040 | 0.6 | 0.05 | 26.0   | 0.2  | 51.4   | 6.3  | 1488.5 | 237.0 | 26.0 | 0.2  | NA |
| Spot 70  | 345  | 658   | 0.7 | 7.3602  | 10.9 | 0.0645 | 15.2 | 0.0041 | 0.6 | 0.04 | 26.1   | 0.2  | 63.5   | 9.3  | 1885.8 | 274.4 | 26.1 | 0.2  | NA |
| Spot 22  | 1675 | 3044  | 1.8 | 13.6870 | 4.0  | 0.0389 | 4.5  | 0.0041 | 0.6 | 0.14 | 26.5   | 0.2  | 38.7   | 1.7  | 884.5  | 92.1  | 26.5 | 0.2  | NA |
| Spot 11  | 429  | 972   | 1.0 | 7.6525  | 9.9  | 0.0671 | 12.9 | 0.0042 | 0.5 | 0.04 | 26.8   | 0.1  | 65.9   | 8.2  | 1908.7 | 232.0 | 26.8 | 0.1  | NA |
| Spot 106 | 268  | 567   | 1.0 | 6.0427  | 12.8 | 0.0822 | 15.1 | 0.0042 | 0.7 | 0.05 | 27.0   | 0.2  | 80.2   | 11.6 | 2255.2 | 262.1 | 27.0 | 0.2  | NA |
| Spot 49  | 251  | 567   | 1.0 | 6.0068  | 15.2 | 0.0838 | 16.6 | 0.0042 | 0.6 | 0.03 | 27.2   | 0.2  | 81.7   | 13.0 | 2272.8 | 287.5 | 27.2 | 0.2  | NA |
| Spot 104 | 1169 | 4135  | 1.1 | 12.8068 | 2.6  | 0.0643 | 3.6  | 0.0063 | 0.7 | 0.20 | 40.3   | 0.3  | 63.3   | 2.2  | 1054.7 | 71.0  | 40.3 | 0.3  | NA |
| Spot 7   | 813  | 6228  | 2.4 | 16.5819 | 2.4  | 0.1197 | 2.9  | 0.0150 | 0.6 | 0.21 | 95.8   | 0.6  | 114.8  | 3.1  | 530.0  | 62.0  | 95.8 | 0.6  | NA |
| Spot 113 | 1449 | 9566  | 2.1 | 18.3341 | 1.7  | 0.1149 | 2.6  | 0.0157 | 0.6 | 0.22 | 100.7  | 0.6  | 110.4  | 2.8  | 325.6  | 58.5  | 101  | 0.6  | NA |
| Spot 35  | 842  | 7286  | 1.9 | 17.3525 | 2.0  | 0.1350 | 3.2  | 0.0175 | 0.6 | 0.19 | 112.0  | 0.7  | 128.6  | 3.8  | 447.6  | 69.1  | 112  | 0.7  | NA |
| Spot 67  | 1057 | 1547  | 1.1 | 16.1716 | 1.6  | 0.1695 | 14.4 | 0.0235 | 0.5 | 0.04 | 149.8  | 0.8  | 159.0  | 21.2 | 298.8  | NA    | 150  | 0.8  | NA |
| Spot 2   | 233  | 3125  | 0.9 | 13.2274 | 4.3  | 0.2456 | 6.8  | 0.0251 | 0.6 | 0.09 | 159.6  | 0.9  | 223.0  | 13.5 | 959.0  | 137.7 | 160  | 0.9  | NA |
| Spot 15  | 1673 | 19641 | 0.9 | 19.4583 | 1.0  | 0.1766 | 1.6  | 0.0252 | 0.7 | 0.42 | 160.5  | 1.1  | 165.1  | 2.5  | 231.6  | 34.2  | 160  | 1.1  | NA |
| Spot 68  | 841  | 10560 | 1.5 | 18.3793 | 1.9  | 0.1866 | 2.2  | 0.0255 | 0.6 | 0.28 | 162.5  | 1.0  | 173.7  | 3.4  | 328.9  | 47.0  | 163  | 1.0  | NA |
| Spot 52  | 1102 | 15794 | 1.5 | 19.0104 | 1.3  | 0.1841 | 2.0  | 0.0258 | 0.6 | 0.30 | 164.2  | 1.0  | 171.6  | 3.1  | 273.9  | 43.2  | 164  | 1.0  | NA |
| Spot 8   | 1117 | 12453 | 1.4 | 18.6660 | 1.3  | 0.1868 | 2.0  | 0.0258 | 0.5 | 0.24 | 164.3  | 0.8  | 173.9  | 3.1  | 306.2  | 43.5  | 164  | 0.8  | NA |
| Spot 88  | 952  | 13374 | 0.8 | 18.6784 | 1.6  | 0.1927 | 1.9  | 0.0266 | 0.8 | 0.41 | 169.4  | 1.3  | 179.0  | 3.1  | 306.5  | 39.9  | 169  | 1.3  | NA |
| Spot 87  | 1035 | 12625 | 1.1 | 18.5082 | 1.4  | 0.1958 | 2.1  | 0.0268 | 0.6 | 0.28 | 170.5  | 1.0  | 181.6  | 3.4  | 327.6  | 45.1  | 171  | 1.0  | NA |
| Spot 107 | 1683 | 20671 | 0.9 | 19.2816 | 1.1  | 0.1894 | 1.7  | 0.0269 | 0.5 | 0.30 | 171.1  | 0.9  | 176.1  | 2.8  | 243.2  | 38.3  | 171  | 0.9  | NA |
| Spot 111 | 533  | 6279  | 1.4 | 16.8057 | 2.1  | 0.2125 | 2.8  | 0.0270 | 0.7 | 0.24 | 171.7  | 1.2  | 195.6  | 5.0  | 495.1  | 60.0  | 172  | 1.2  | NA |
| Spot 10  | 569  | 8579  | 1.5 | 16.9866 | 2.5  | 0.2153 | 2.9  | 0.0273 | 1.1 | 0.37 | 173.5  | 1.8  | 198.0  | 5.2  | 501.6  | 58.9  | 173  | 1.8  | NA |
| Spot 84  | 765  | 6222  | 1.3 | 17.8255 | 1.8  | 0.2038 | 3.0  | 0.0275 | 0.6 | 0.21 | 174.6  | 1.1  | 188.4  | 5.1  | 364.8  | 65.3  | 175  | 1.1  | NA |
| Spot 54  | 258  | 3337  | 1.3 | 14.4375 | 3.1  | 0.2481 | 6.0  | 0.0277 | 0.7 | 0.12 | 175.9  | 1.2  | 225.0  | 12.1 | 775.4  | 124.9 | 176  | 1.2  | NA |
| Spot 63  | 3605 | 57854 | 2.4 | 19.5965 | 0.7  | 0.2335 | 1.0  | 0.0334 | 0.6 | 0.63 | 211.7  | 1.3  | 213.1  | 1.8  | 228.3  | 17.1  | 212  | 1.3  | NA |
| Spot 69  | 3963 | 22413 | 3.2 | 19.3918 | 0.7  | 0.2408 | 1.5  | 0.0343 | 0.5 | 0.35 | 217.4  | 1.2  | 219.1  | 3.0  | 237.6  | 33.2  | 217  | 1.2  | NA |
| Spot 20  | 2276 | 42499 | 1.8 | 19.6906 | 0.7  | 0.2402 | 1.0  | 0.0344 | 0.5 | 0.53 | 218.3  | 1.1  | 218.6  | 2.0  | 221.7  | 19.5  | 218  | 1.1  | NA |
| Spot 83  | 3642 | 57702 | 2.6 | 19.6615 | 0.6  | 0.2421 | 0.9  | 0.0347 | 0.5 | 0.62 | 219.8  | 1.2  | 220.2  | 1.7  | 224.7  | 15.9  | 220  | 1.2  | NA |
| Spot 96  | 4732 | 75189 | 1.4 | 19.6275 | 0.5  | 0.2440 | 0.8  | 0.0348 | 0.5 | 0.60 | 220.7  | 1.0  | 221.7  | 1.5  | 232.7  | 14.2  | 221  | 1.0  | NA |
| Spot 19  | 2406 | 39699 | 2.1 | 19.6561 | 0.8  | 0.2440 | 1.1  | 0.0349 | 0.6 | 0.52 | 221.4  | 1.2  | 221.7  | 2.2  | 224.7  | 21.4  | 221  | 1.2  | NA |
| Spot 109 | 1274 | 20352 | 2.0 | 19.1891 | 1.1  | 0.2560 | 1.7  | 0.0362 | 0.5 | 0.29 | 229.1  | 1.1  | 231.5  | 3.5  | 255.7  | 37.1  | 229  | 1.1  | NA |
| Spot 14  | 1086 | 3617  | 1.7 | 17.9446 | 1.2  | 0.2610 | 1.9  | 0.0365 | 0.8 | 0.40 | 231.2  | 1.7  | 235.5  | 4.1  | 277.9  | 40.7  | 231  | 1.7  | NA |
| Spot 89  | 2877 | 52775 | 1.6 | 19.7043 | 0.7  | 0.2616 | 0.9  | 0.0375 | 0.5 | 0.57 | 237.6  | 1.2  | 236.0  | 1.9  | 219.9  | 16.8  | 238  | 1.2  | NA |
| Spot 36  | 228  | 36207 | 0.6 | 8.6841  | 0.7  | 5.2912 | 1.0  | 0.3328 | 0.6 | 0.66 | 1851.9 | 10.3 | 1867.4 | 8.3  | 1884.7 | 13.2  | 1885 | 13.2 | 98 |

## MR19DV-5

|         |     |      |     |          |         |         |        |        |      |      |      |     |       |        |        |       |      |     |    |
|---------|-----|------|-----|----------|---------|---------|--------|--------|------|------|------|-----|-------|--------|--------|-------|------|-----|----|
| Spot 24 | 62  | 779  | 0.8 | 11.9395  | 88.4    | 0.0279  | 90.6   | 0.0031 | 18.0 | 0.20 | 20.1 | 3.6 | 28.0  | 25.0   | 770.7  | NA    | 20.1 | 3.6 | NA |
| Spot 22 | 62  | 1598 | 0.8 | -0.5604  | -2280.5 | -0.8401 | 2280.6 | 0.0034 | 18.7 | 0.01 | 21.7 | 4.0 | NA    | NA     | NA     | NA    | 21.7 | 4.0 | NA |
| Spot 11 | 114 | 1371 | 0.7 | 27.1494  | 69.2    | 0.0119  | 74.0   | 0.0034 | 13.8 | 0.19 | 21.7 | 3.0 | 12.1  | 8.9    | NA     | NA    | 21.7 | 3.0 | NA |
| Spot 9  | 50  | 691  | 0.5 | 6.6655   | 107.2   | 0.0615  | 109.3  | 0.0034 | 19.8 | 0.18 | 22.0 | 4.3 | 60.6  | 64.3   | 2104.5 | NA    | 22.0 | 4.3 | NA |
| Spot 1  | 59  | 707  | 0.8 | 6.8112   | 331.7   | 0.0603  | 332.6  | 0.0034 | 24.9 | 0.07 | 22.0 | 5.5 | 59.4  | 194.3  | 2066.2 | NA    | 22.0 | 5.5 | NA |
| Spot 17 | 61  | 1160 | 0.7 | -1.1343  | -2904.4 | -0.4278 | 2904.5 | 0.0034 | 24.9 | 0.01 | 22.0 | 5.5 | NA    | NA     | NA     | NA    | 22.0 | 5.5 | NA |
| Spot 8  | 51  | 529  | 0.9 | 6.0127   | 161.4   | 0.0670  | 162.6  | 0.0034 | 18.3 | 0.11 | 22.1 | 4.0 | 65.9  | 104.1  | 2243.0 | NA    | 22.1 | 4.0 | NA |
| Spot 23 | 114 | 2562 | 0.5 | 9.1219   | 221.0   | 0.0495  | 221.2  | 0.0035 | 9.9  | 0.04 | 22.3 | 2.2 | 49.1  | 106.4  | 1694.1 | NA    | 22.3 | 2.2 | NA |
| Spot 3  | 122 | 1956 | 0.7 | 2.2533   | 1221.2  | 0.2099  | 1221.2 | 0.0035 | 9.3  | 0.01 | 22.3 | 2.1 | 193.5 | NA     | 4047.3 | NA    | 22.3 | 2.1 | NA |
| Spot 15 | 147 | 2034 | 0.6 | 15.7096  | 31.0    | 0.0271  | 35.2   | 0.0035 | 16.0 | 0.45 | 22.4 | 3.6 | 27.1  | 9.4    | 462.7  | NA    | 22.4 | 3.6 | NA |
| Spot 13 | 72  | 1648 | 0.9 | 16.0030  | 143.2   | 0.0258  | 144.0  | 0.0035 | 12.8 | 0.09 | 22.6 | 2.9 | 25.9  | 36.8   | 343.7  | NA    | 22.6 | 2.9 | NA |
| Spot 10 | 98  | 2861 | 0.7 | 20.0290  | 144.0   | 0.0216  | 144.8  | 0.0035 | 12.6 | 0.09 | 22.6 | 2.8 | 21.7  | 31.1   | NA     | NA    | 22.6 | 2.8 | NA |
| Spot 20 | 121 | 2532 | 0.6 | 25.1618  | 78.4    | 0.0166  | 79.7   | 0.0036 | 10.3 | 0.13 | 23.0 | 2.4 | 16.7  | 13.2   | NA     | NA    | 23.0 | 2.4 | NA |
| Spot 21 | 49  | 856  | 0.8 | 3.6788   | 417.3   | 0.1275  | 418.1  | 0.0036 | 24.8 | 0.06 | 23.1 | 5.7 | 121.9 | 521.6  | 3235.5 | NA    | 23.1 | 5.7 | NA |
| Spot 19 | 96  | 1059 | 0.6 | -10.7692 | -409.4  | -0.0543 | 409.6  | 0.0036 | 12.1 | 0.03 | 23.2 | 2.8 | NA    | -243.4 | NA     | NA    | 23.2 | 2.8 | NA |
| Spot 7  | 102 | 291  | 0.7 | 9.0189   | 32.8    | 0.0306  | 44.0   | 0.0036 | 19.5 | 0.44 | 23.5 | 4.6 | 30.6  | 13.3   | 633.7  | NA    | 23.5 | 4.6 | NA |
| Spot 18 | 132 | 2117 | 0.9 | 12.7955  | 104.9   | 0.0362  | 105.4  | 0.0037 | 9.8  | 0.09 | 23.8 | 2.3 | 36.2  | 37.5   | 959.6  | NA    | 23.8 | 2.3 | NA |
| Spot 5  | 67  | 921  | 0.6 | 8.3626   | 43.4    | 0.0541  | 47.0   | 0.0038 | 16.7 | 0.36 | 24.2 | 4.0 | 53.5  | 24.5   | 1703.9 | 853.2 | 24.2 | 4.0 | NA |
| Spot 14 | 88  | 1091 | 0.8 | 13.0698  | 59.0    | 0.0327  | 62.1   | 0.0038 | 16.8 | 0.27 | 24.2 | 4.1 | 32.7  | 20.0   | 706.8  | NA    | 24.2 | 4.1 | NA |
| Spot 16 | 220 | 3156 | 1.4 | 19.7857  | 39.9    | 0.0237  | 40.6   | 0.0038 | 6.6  | 0.16 | 24.3 | 1.6 | 23.8  | 9.6    | NA     | NA    | 24.3 | 1.6 | NA |
| Spot 12 | 295 | 5405 | 0.9 | 22.1629  | 21.2    | 0.0221  | 21.8   | 0.0038 | 4.4  | 0.20 | 24.4 | 1.1 | 22.2  | 4.8    | NA     | NA    | 24.4 | 1.1 | NA |
| Spot 2  | 79  | 1084 | 0.6 | 5.9113   | 377.2   | 0.0848  | 377.3  | 0.0039 | 9.1  | 0.02 | 25.2 | 2.3 | 82.6  | 308.6  | 2423.3 | NA    | 25.2 | 2.3 | NA |
| Spot 6  | 135 | 2901 | 1.0 | 23.8022  | 60.9    | 0.0204  | 63.1   | 0.0040 | 15.4 | 0.24 | 25.9 | 4.0 | 20.5  | 12.8   | NA     | NA    | 25.9 | 4.0 | NA |

|          |      |       |     |         |      |        |      |        |     |      |       |     |       |      |        |        |      |     |    |
|----------|------|-------|-----|---------|------|--------|------|--------|-----|------|-------|-----|-------|------|--------|--------|------|-----|----|
| Spot 89  | 453  | 582   | 0.8 | 5.8034  | 14.6 | 0.0437 | 17.1 | 0.0021 | 0.7 | 0.04 | 13.6  | 0.1 | 43.4  | 7.3  | 2344.6 | 294.9  | 13.6 | 0.1 | NA |
| Spot 5   | 450  | 342   | 1.2 | 4.9704  | 12.5 | 0.0481 | 16.6 | 0.0021 | 0.5 | 0.03 | 13.7  | 0.1 | 47.7  | 7.7  | 2496.6 | 281.2  | 13.7 | 0.1 | NA |
| Spot 118 | 1049 | 1143  | 0.6 | 10.2175 | 7.0  | 0.0252 | 10.1 | 0.0021 | 0.5 | 0.04 | 13.8  | 0.1 | 25.3  | 2.5  | 1330.1 | 196.7  | 13.8 | 0.1 | NA |
| Spot 24  | 250  | 247   | 0.6 | 4.4357  | 16.2 | 0.0521 | 25.7 | 0.0022 | 0.6 | 0.02 | 13.9  | 0.1 | 51.6  | 12.9 | 2610.6 | 436.1  | 13.9 | 0.1 | NA |
| Spot 14  | 192  | 273   | 1.5 | 4.7648  | 27.0 | 0.0495 | 36.9 | 0.0022 | 0.6 | 0.02 | 14.1  | 0.1 | 49.0  | 17.7 | 2493.8 | 647.5  | 14.1 | 0.1 | NA |
| Spot 77  | 1057 | 1413  | 1.0 | 10.1557 | 6.8  | 0.0270 | 9.0  | 0.0022 | 0.7 | 0.08 | 14.2  | 0.1 | 27.1  | 2.4  | 1396.8 | 172.7  | 14.2 | 0.1 | NA |
| Spot 80  | 1216 | 400   | 1.0 | 9.5425  | 6.4  | 0.0212 | 50.1 | 0.0022 | 0.6 | 0.01 | 14.4  | 0.1 | 21.3  | 10.6 | 894.8  | NA     | 14.4 | 0.1 | NA |
| Spot 87  | 660  | 829   | 0.9 | 9.2886  | 10.6 | 0.0280 | 15.5 | 0.0022 | 0.6 | 0.04 | 14.4  | 0.1 | 28.0  | 4.3  | 1438.9 | 296.1  | 14.4 | 0.1 | NA |
| Spot 114 | 439  | 558   | 0.5 | 6.2922  | 12.6 | 0.0421 | 20.6 | 0.0023 | 0.6 | 0.03 | 14.5  | 0.1 | 41.8  | 8.4  | 2170.5 | 363.0  | 14.5 | 0.1 | NA |
| Spot 58  | 551  | 857   | 0.8 | 7.6342  | 9.3  | 0.0361 | 11.6 | 0.0023 | 0.7 | 0.06 | 14.6  | 0.1 | 36.0  | 4.1  | 1881.5 | 209.3  | 14.6 | 0.1 | NA |
| Spot 6   | 4091 | 5607  | 0.9 | 17.0310 | 2.5  | 0.0176 | 3.4  | 0.0023 | 0.6 | 0.16 | 14.7  | 0.1 | 17.7  | 0.6  | 449.8  | 73.5   | 14.7 | 0.1 | NA |
| Spot 97  | 784  | 994   | 0.5 | 8.5482  | 7.1  | 0.0325 | 9.7  | 0.0023 | 0.6 | 0.06 | 14.7  | 0.1 | 32.5  | 3.1  | 1677.4 | 179.1  | 14.7 | 0.1 | NA |
| Spot 9   | 708  | 862   | 0.6 | 7.1736  | 9.1  | 0.0391 | 9.5  | 0.0023 | 0.5 | 0.05 | 14.8  | 0.1 | 39.0  | 3.6  | 2007.9 | 168.4  | 14.8 | 0.1 | NA |
| Spot 15  | 203  | 276   | 0.5 | 4.5900  | 13.8 | 0.0552 | 20.7 | 0.0023 | 1.0 | 0.05 | 14.9  | 0.2 | 54.5  | 11.0 | 2584.6 | 349.0  | 14.9 | 0.2 | NA |
| Spot 86  | 287  | 290   | 1.2 | 4.8539  | 15.4 | 0.0518 | 25.4 | 0.0023 | 0.6 | 0.02 | 14.9  | 0.1 | 51.3  | 12.7 | 2478.6 | 435.9  | 14.9 | 0.1 | NA |
| Spot 33  | 426  | 540   | 1.4 | 5.4594  | 12.2 | 0.0515 | 13.3 | 0.0023 | 0.5 | 0.04 | 15.0  | 0.1 | 51.0  | 6.6  | 2453.5 | 226.0  | 15.0 | 0.1 | NA |
| Spot 120 | 472  | 520   | 0.9 | 6.3394  | 12.2 | 0.0429 | 21.5 | 0.0023 | 0.5 | 0.02 | 15.1  | 0.1 | 42.7  | 9.0  | 2132.6 | 381.4  | 15.1 | 0.1 | NA |
| Spot 84  | 734  | 976   | 0.7 | 8.0901  | 8.7  | 0.0354 | 12.2 | 0.0023 | 0.6 | 0.05 | 15.1  | 0.1 | 35.4  | 4.2  | 1790.1 | 221.9  | 15.1 | 0.1 | NA |
| Spot 61  | 677  | 915   | 0.8 | 7.3210  | 11.2 | 0.0403 | 13.1 | 0.0024 | 0.7 | 0.05 | 15.4  | 0.1 | 40.1  | 5.2  | 1983.4 | 234.2  | 15.4 | 0.1 | NA |
| Spot 113 | 881  | 964   | 1.1 | 8.9217  | 7.5  | 0.0324 | 9.2  | 0.0024 | 0.6 | 0.07 | 15.5  | 0.1 | 32.4  | 2.9  | 1581.3 | 172.5  | 15.5 | 0.1 | NA |
| Spot 67  | 152  | 263   | 0.9 | 5.7023  | 15.8 | 0.0417 | 38.1 | 0.0024 | 0.5 | 0.01 | 15.6  | 0.1 | 41.4  | 15.5 | 2026.6 | 702.7  | 15.6 | 0.1 | NA |
| Spot 30  | 685  | 835   | 1.2 | 7.7582  | 9.8  | 0.0376 | 16.7 | 0.0024 | 0.5 | 0.03 | 15.6  | 0.1 | 37.5  | 6.1  | 1845.2 | 304.1  | 15.6 | 0.1 | NA |
| Spot 50  | 485  | 169   | 0.5 | 5.0641  | 12.7 | 0.0401 | 51.7 | 0.0025 | 0.5 | 0.01 | 15.9  | 0.1 | 39.9  | 20.2 | 1920.9 | 1005.0 | 15.9 | 0.1 | NA |
| Spot 45  | 389  | 511   | 0.9 | 6.3970  | 12.2 | 0.0471 | 19.2 | 0.0026 | 0.6 | 0.03 | 16.9  | 0.1 | 46.8  | 8.8  | 2100.9 | 341.1  | 16.9 | 0.1 | NA |
| Spot 12  | 370  | 721   | 1.9 | 7.2395  | 10.4 | 0.0613 | 12.6 | 0.0037 | 0.5 | 0.04 | 23.9  | 0.1 | 60.4  | 7.4  | 1947.8 | 225.9  | 23.9 | 0.1 | NA |
| Spot 22  | 1742 | 2980  | 0.9 | 15.0029 | 3.5  | 0.0329 | 8.0  | 0.0039 | 0.6 | 0.08 | 24.8  | 0.2 | 32.8  | 2.6  | 665.2  | 170.9  | 24.8 | 0.2 | NA |
| Spot 110 | 1091 | 2311  | 0.7 | 12.8107 | 5.3  | 0.0383 | 8.1  | 0.0039 | 0.6 | 0.07 | 24.9  | 0.1 | 38.2  | 3.0  | 983.7  | 163.9  | 24.9 | 0.1 | NA |
| Spot 41  | 743  | 1530  | 0.8 | 11.6125 | 6.3  | 0.0423 | 7.9  | 0.0040 | 0.9 | 0.11 | 25.6  | 0.2 | 42.0  | 3.3  | 1118.6 | 156.9  | 25.6 | 0.2 | NA |
| Spot 26  | 1024 | 2541  | 1.9 | 13.1136 | 5.9  | 0.0408 | 7.0  | 0.0042 | 0.6 | 0.09 | 26.9  | 0.2 | 40.6  | 2.8  | 947.3  | 142.0  | 26.9 | 0.2 | NA |
| Spot 62  | 645  | 1288  | 0.3 | 10.8087 | 6.6  | 0.0526 | 9.6  | 0.0047 | 0.6 | 0.06 | 30.1  | 0.2 | 52.1  | 4.9  | 1237.4 | 187.6  | 30.1 | 0.2 | NA |
| Spot 116 | 172  | 1318  | 1.7 | 9.6149  | 7.5  | 0.1741 | 8.6  | 0.0135 | 0.6 | 0.06 | 86.4  | 0.5 | 163.0 | 12.9 | 1498.7 | 162.4  | 86.4 | 0.5 | NA |
| Spot 55  | 1091 | 10011 | 3.0 | 17.9766 | 2.0  | 0.1294 | 2.8  | 0.0174 | 0.6 | 0.22 | 111.0 | 0.7 | 123.6 | 3.3  | 372.8  | 61.9   | 111  | 0.7 | NA |
| Spot 83  | 3886 | 18537 | 3.2 | 19.9964 | 0.8  | 0.1248 | 1.5  | 0.0184 | 0.6 | 0.43 | 117.6 | 0.7 | 119.4 | 1.6  | 155.8  | 30.8   | 118  | 0.7 | NA |
| Spot 7   | 210  | 2905  | 1.9 | 13.0286 | 4.8  | 0.2386 | 8.3  | 0.0242 | 0.5 | 0.06 | 153.9 | 0.8 | 217.3 | 16.3 | 974.9  | 169.4  | 154  | 0.8 | NA |
| Spot 90  | 346  | 4845  | 1.5 | 15.9512 | 3.2  | 0.2088 | 3.9  | 0.0254 | 0.6 | 0.16 | 161.9 | 1.0 | 192.5 | 6.9  | 587.3  | 84.1   | 162  | 1.0 | NA |
| Spot 48  | 1362 | 16920 | 0.9 | 19.5127 | 1.1  | 0.1766 | 1.4  | 0.0255 | 0.6 | 0.45 | 162.1 | 1.0 | 165.1 | 2.1  | 208.3  | 28.5   | 162  | 1.0 | NA |
| Spot 92  | 1093 | 14226 | 1.4 | 18.7393 | 1.4  | 0.1851 | 1.9  | 0.0257 | 0.5 | 0.27 | 163.7 | 0.8 | 172.4 | 3.0  | 294.5  | 41.1   | 164  | 0.8 | NA |
| Spot 3   | 514  | 10406 | 2.1 | 11.7954 | 3.7  | 0.2956 | 3.8  | 0.0258 | 0.6 | 0.15 | 164.0 | 0.9 | 262.9 | 8.8  | 1273.2 | 73.3   | 164  | 0.9 | NA |
| Spot 20  | 288  | 4184  | 1.3 | 15.6923 | 3.3  | 0.2159 | 6.2  | 0.0260 | 0.6 | 0.09 | 165.5 | 1.0 | 198.5 | 11.3 | 611.3  | 134.4  | 166  | 1.0 | NA |
| Spot 117 | 836  | 12822 | 1.4 | 18.2062 | 1.6  | 0.1974 | 2.0  | 0.0266 | 0.6 | 0.30 | 169.3 | 1.0 | 183.0 | 3.4  | 363.9  | 43.2   | 169  | 1.0 | NA |
| Spot 57  | 648  | 7934  | 1.1 | 17.7313 | 1.8  | 0.1999 | 2.5  | 0.0266 | 0.5 | 0.21 | 169.5 | 0.9 | 185.0 | 4.2  | 387.8  | 54.1   | 170  | 0.9 | NA |
| Spot 99  | 648  | 10423 | 1.4 | 17.9042 | 1.6  | 0.2008 | 2.6  | 0.0268 | 0.6 | 0.23 | 170.5 | 1.0 | 185.8 | 4.4  | 385.6  | 57.2   | 170  | 1.0 | NA |
| Spot 82  | 837  | 6928  | 0.9 | 18.6794 | 1.5  | 0.1901 | 3.9  | 0.0268 | 0.6 | 0.16 | 170.6 | 1.0 | 176.7 | 6.3  | 258.7  | 87.7   | 171  | 1.0 | NA |
| Spot 78  | 1453 | 16556 | 1.2 | 19.4740 | 1.0  | 0.1878 | 1.6  | 0.0270 | 0.5 | 0.33 | 171.6 | 0.9 | 174.7 | 2.6  | 217.1  | 35.7   | 172  | 0.9 | NA |
| Spot 98  | 502  | 6417  | 1.9 | 17.0000 | 2.3  | 0.2100 | 3.3  | 0.0270 | 0.7 | 0.22 | 171.7 | 1.2 | 193.6 | 5.8  | 469.6  | 70.9   | 172  | 1.2 | NA |
| Spot 2   | 341  | 5523  | 1.8 | 16.1287 | 2.6  | 0.2215 | 4.6  | 0.0272 | 0.7 | 0.15 | 172.7 | 1.2 | 203.1 | 8.4  | 572.6  | 98.4   | 173  | 1.2 | NA |
| Spot 79  | 956  | 6252  | 1.0 | 18.1633 | 1.8  | 0.1976 | 2.7  | 0.0272 | 1.2 | 0.45 | 173.0 | 2.1 | 183.1 | 4.6  | 315.5  | 55.6   | 173  | 2.1 | NA |
| Spot 29  | 545  | 9979  | 1.7 | 17.9338 | 1.9  | 0.2040 | 3.1  | 0.0272 | 0.6 | 0.18 | 173.1 | 1.0 | 188.5 | 5.3  | 386.4  | 68.1   | 173  | 1.0 | NA |
| Spot 27  | 629  | 10565 | 1.4 | 18.2573 | 1.7  | 0.2004 | 2.8  | 0.0272 | 0.6 | 0.21 | 173.1 | 1.0 | 185.5 | 4.7  | 346.5  | 60.9   | 173  | 1.0 | NA |
| Spot 81  | 1162 | 16513 | 0.7 | 19.0968 | 1.3  | 0.1939 | 2.1  | 0.0273 | 0.9 | 0.41 | 173.9 | 1.5 | 180.0 | 3.4  | 261.3  | 43.8   | 174  | 1.5 | NA |
| Spot 18  | 440  | 6569  | 1.8 | 17.5958 | 2.0  | 0.2059 | 2.7  | 0.0273 | 0.6 | 0.21 | 173.9 | 1.0 | 190.1 | 4.6  | 396.4  | 58.2   | 174  | 1.0 | NA |
| Spot 91  | 876  | 13510 | 0.9 | 18.5973 | 1.3  | 0.1985 | 1.8  | 0.0274 | 0.6 | 0.31 | 174.2 | 1.0 | 183.9 | 3.0  | 309.9  | 39.1   | 174  | 1.0 | NA |
| Spot 40  | 649  | 10104 | 1.4 | 18.6855 | 1.5  | 0.1971 | 2.2  | 0.0274 | 0.6 | 0.27 | 174.5 | 1.0 | 182.7 | 3.6  | 290.9  | 47.9   | 174  | 1.0 | NA |
| Spot 71  | 513  | 7484  | 1.1 | 17.4461 | 2.2  | 0.2098 | 2.6  | 0.0274 | 0.5 | 0.20 | 174.5 | 0.9 | 193.4 | 4.5  | 430.8  | 55.9   | 175  | 0.9 | NA |
| Spot 112 | 447  | 7789  | 1.6 | 17.7214 | 2.2  | 0.2064 | 3.1  | 0.0274 | 0.6 | 0.20 | 174.5 | 1.1 | 190.5 | 5.3  | 394.0  | 67.4   | 175  | 1.1 | NA |
| Spot 16  | 284  | 4280  | 2.4 | 16.0844 | 2.9  | 0.2227 | 6.3  | 0.0275 | 0.5 | 0.09 | 174.9 | 0.9 | 204.1 | 11.6 | 557.3  | 136.0  | 175  | 0.9 | NA |
| Spot 59  | 629  | 9610  | 1.6 | 18.1980 | 1.9  | 0.2025 | 2.9  | 0.0275 | 1.1 | 0.37 | 175.0 | 1.9 | 187.2 | 4.9  | 344.7  | 60.1   | 175  | 1.9 | NA |
| Spot 88  | 561  | 7742  | 2.0 | 17.9822 | 1.5  | 0.2035 | 3.0  | 0.0275 | 0.7 | 0.25 | 175.1 | 1.3 | 188.1 | 5.2  | 354.7  | 66.4   | 175  | 1.3 | NA |
| Spot 70  | 548  | 7147  | 1.4 | 17.6110 | 1.5  | 0.2084 | 2.9  | 0.0276 | 0.5 | 0.19 | 175.3 | 0.9 | 192.2 | 5.1  | 405.2  | 64.6   | 175  | 0.9 | NA |
| Spot 11  | 421  | 5587  | 1.7 | 16.9689 | 2.1  | 0.2138 | 3.3  | 0.0276 | 0.6 | 0.18 | 175.4 | 1.0 | 196.7 | 6.0  | 461.4  | 72.7   | 175  | 1.0 | NA |
| Spot 108 | 183  | 2629  | 1.7 | 13.2362 | 4.8  | 0.2670 | 7.8  | 0.0276 | 0.8 | 0.10 | 175.6 | 1.3 | 240.3 | 16.7 | 931.4  | 159.8  | 176  | 1.3 | NA |
| Spot 105 | 410  | 6438  | 1.3 | 16.0977 | 2.4  | 0.2279 | 3.3  | 0.0276 | 0.6 | 0.19 | 175.7 | 1.1 | 208.5 | 6.3  | 597.1  | 70.6   | 176  | 1.1 | NA |
| Spot 85  | 393  | 5502  | 2.1 | 16.4603 | 2.4  | 0.2211 | 4.0  | 0.0277 | 0.6 | 0.16 | 175.8 | 1.1 | 202.8 | 7.4  | 529.4  | 87.0   | 176  | 1.1 | NA |
| Spot 25  | 363  | 2705  | 1.4 | 14.9240 | 2.7  | 0.2353 | 7.3  | 0.0277 | 0.8 | 0.11 | 175.9 | 1.4 | 214.5 | 14.2 | 663.2  | 156.5  | 176  | 1.4 | NA |
| Spot 66  | 451  | 6798  | 1.6 | 17.1248 | 1.8  | 0.2153 | 4.1  | 0.0277 | 0.8 | 0.20 | 176.2 | 1.4 | 198.0 | 7.4  | 465.9  | 89.4   | 176  | 1.4 | NA |
| Spot 1   | 480  | 7515  | 1.4 | 17.1685 | 2.0  | 0.2146 | 2.9  | 0.0277 | 1.0 | 0.35 | 176.4 | 1.8 | 197.4 | 5.3  | 456.2  | 61.1   | 176  | 1.8 | NA |
| Spot 103 | 481  | 2265  | 1.4 | 15.7222 | 2.8  | 0.2185 | 7.3  | 0.0277 | 0.7 | 0.10 | 176.4 | 1.2 | 200.6 | 13.2 | 495    |        |      |     |    |



|         |     |        |     |         |     |         |     |        |     |      |        |      |        |      |        |      |      |      |     |
|---------|-----|--------|-----|---------|-----|---------|-----|--------|-----|------|--------|------|--------|------|--------|------|------|------|-----|
| Spot 36 | 480 | 51928  | 2.8 | 13.0540 | 0.6 | 2.0179  | 0.9 | 0.1915 | 0.5 | 0.62 | 1129.3 | 5.6  | 1121.6 | 5.9  | 1106.5 | 13.7 | 1107 | 13.7 | 102 |
| Spot 72 | 149 | 17200  | 1.5 | 12.2829 | 0.9 | 2.3488  | 1.2 | 0.2110 | 0.6 | 0.49 | 1234.2 | 6.6  | 1227.2 | 8.6  | 1214.8 | 20.8 | 1215 | 20.8 | 102 |
| Spot 63 | 269 | 42511  | 1.4 | 11.0076 | 0.6 | 3.2120  | 0.9 | 0.2569 | 0.6 | 0.66 | 1474.1 | 7.5  | 1460.1 | 6.6  | 1439.7 | 12.3 | 1440 | 12.3 | 102 |
| Spot 53 | 341 | 5974   | 3.8 | 9.3617  | 0.9 | 4.3136  | 2.2 | 0.3000 | 0.7 | 0.31 | 1691.2 | 9.9  | 1696.0 | 17.8 | 1701.9 | 37.8 | 1702 | 37.8 | 99  |
| Spot 76 | 363 | 40099  | 2.6 | 9.4089  | 0.6 | 4.5750  | 0.9 | 0.3128 | 0.6 | 0.67 | 1754.5 | 9.2  | 1744.7 | 7.4  | 1733.0 | 12.0 | 1733 | 12.0 | 101 |
| Spot 69 | 143 | 28426  | 4.1 | 9.2746  | 0.7 | 4.6370  | 0.9 | 0.3128 | 0.6 | 0.60 | 1754.4 | 8.7  | 1756.0 | 7.8  | 1757.8 | 13.7 | 1758 | 13.7 | 100 |
| Spot 21 | 630 | 116695 | 1.9 | 8.9779  | 0.6 | 5.0473  | 0.8 | 0.3292 | 0.6 | 0.72 | 1834.6 | 9.6  | 1827.3 | 7.0  | 1818.9 | 10.3 | 1819 | 10.3 | 101 |
| Spot 95 | 638 | 68489  | 2.7 | 7.9874  | 0.7 | 5.7188  | 0.9 | 0.3326 | 0.6 | 0.66 | 1851.0 | 9.6  | 1934.2 | 7.8  | 2024.5 | 12.0 | 2025 | 12.0 | 91  |
| Spot 65 | 297 | 86128  | 1.3 | 5.3281  | 0.6 | 13.7221 | 0.9 | 0.5298 | 0.6 | 0.70 | 2740.5 | 13.7 | 2730.7 | 8.3  | 2723.5 | 10.2 | 2723 | 10.2 | 101 |

## MR19DV-8

|          |      |       |     |         |      |        |      |        |     |      |      |     |      |      |        |       |      |     |    |
|----------|------|-------|-----|---------|------|--------|------|--------|-----|------|------|-----|------|------|--------|-------|------|-----|----|
| Spot 59  | 92   | 226   | 1.2 | 4.5907  | 15.1 | 0.0720 | 18.6 | 0.0032 | 0.5 | 0.03 | 20.8 | 0.1 | 70.6 | 12.7 | 2473.9 | 317.3 | 20.8 | 0.1 | NA |
| Spot 145 | 183  | 436   | 1.7 | 5.2874  | 13.4 | 0.0741 | 20.3 | 0.0034 | 0.7 | 0.03 | 21.7 | 0.1 | 72.6 | 14.2 | 2452.4 | 347.9 | 21.7 | 0.1 | NA |
| Spot 51  | 276  | 757   | 0.7 | 6.7222  | 13.5 | 0.0637 | 15.0 | 0.0035 | 0.6 | 0.04 | 22.7 | 0.1 | 62.7 | 9.1  | 2113.8 | 263.6 | 22.7 | 0.1 | NA |
| Spot 36  | 181  | 436   | 1.3 | 5.0320  | 18.3 | 0.0835 | 20.2 | 0.0036 | 0.5 | 0.03 | 22.9 | 0.1 | 81.5 | 15.8 | 2558.3 | 342.5 | 22.9 | 0.1 | NA |
| Spot 40  | 571  | 1168  | 0.9 | 8.9884  | 6.8  | 0.0492 | 9.8  | 0.0036 | 0.7 | 0.07 | 23.1 | 0.2 | 48.7 | 4.7  | 1610.4 | 182.5 | 23.1 | 0.2 | NA |
| Spot 67  | 106  | 238   | 1.4 | 4.6625  | 11.7 | 0.0800 | 19.2 | 0.0036 | 1.0 | 0.05 | 23.1 | 0.2 | 78.1 | 14.5 | 2469.6 | 327.9 | 23.1 | 0.2 | NA |
| Spot 141 | 137  | 321   | 1.2 | 4.3893  | 20.9 | 0.0949 | 23.1 | 0.0036 | 0.6 | 0.03 | 23.4 | 0.1 | 92.0 | 20.4 | 2739.1 | 386.4 | 23.4 | 0.1 | NA |
| Spot 19  | 174  | 397   | 1.0 | 6.0245  | 13.5 | 0.0666 | 17.0 | 0.0036 | 0.5 | 0.03 | 23.4 | 0.1 | 65.4 | 10.8 | 2136.7 | 300.4 | 23.4 | 0.1 | NA |
| Spot 112 | 258  | 159   | 2.0 | 4.7610  | 10.8 | 0.0642 | 32.6 | 0.0037 | 0.6 | 0.02 | 23.8 | 0.1 | 63.2 | 20.0 | 2044.7 | 593.5 | 23.8 | 0.1 | NA |
| Spot 98  | 266  | 672   | 1.5 | 6.9899  | 11.5 | 0.0631 | 16.6 | 0.0037 | 0.6 | 0.03 | 23.9 | 0.1 | 62.1 | 10.0 | 2001.7 | 296.6 | 23.9 | 0.1 | NA |
| Spot 70  | 259  | 748   | 1.0 | 6.1750  | 10.0 | 0.0743 | 12.9 | 0.0037 | 0.4 | 0.03 | 24.0 | 0.1 | 72.8 | 9.0  | 2281.4 | 222.2 | 24.0 | 0.1 | NA |
| Spot 47  | 241  | 553   | 1.8 | 6.4234  | 13.8 | 0.0684 | 18.5 | 0.0038 | 0.7 | 0.04 | 24.3 | 0.2 | 67.2 | 12.0 | 2118.6 | 326.9 | 24.3 | 0.2 | NA |
| Spot 87  | 141  | 327   | 0.8 | 4.6273  | 15.8 | 0.0927 | 19.4 | 0.0038 | 0.6 | 0.03 | 24.3 | 0.1 | 90.0 | 16.7 | 2634.7 | 325.8 | 24.3 | 0.1 | NA |
| Spot 114 | 209  | 480   | 0.8 | 6.6922  | 8.9  | 0.0634 | 18.2 | 0.0038 | 0.6 | 0.04 | 24.4 | 0.2 | 62.4 | 11.0 | 1976.8 | 326.4 | 24.4 | 0.2 | NA |
| Spot 13  | 463  | 562   | 0.7 | 9.0387  | 8.4  | 0.0447 | 24.3 | 0.0038 | 0.6 | 0.02 | 24.4 | 0.1 | 44.4 | 10.6 | 1327.3 | 477.4 | 24.4 | 0.1 | NA |
| Spot 144 | 384  | 941   | 0.7 | 8.9611  | 9.0  | 0.0506 | 10.9 | 0.0038 | 0.5 | 0.05 | 24.4 | 0.1 | 50.1 | 5.3  | 1560.4 | 204.9 | 24.4 | 0.1 | NA |
| Spot 45  | 379  | 894   | 1.2 | 8.3014  | 7.0  | 0.0552 | 9.5  | 0.0038 | 0.5 | 0.05 | 24.6 | 0.1 | 54.6 | 5.0  | 1712.8 | 174.2 | 24.6 | 0.1 | NA |
| Spot 128 | 1424 | 2045  | 1.1 | 14.1966 | 3.9  | 0.0334 | 11.3 | 0.0038 | 0.7 | 0.06 | 24.6 | 0.2 | 33.4 | 3.7  | 719.2  | 239.9 | 24.6 | 0.2 | NA |
| Spot 55  | 308  | 773   | 0.9 | 7.1243  | 11.8 | 0.0651 | 12.3 | 0.0038 | 0.5 | 0.04 | 24.7 | 0.1 | 64.0 | 7.6  | 2000.9 | 218.5 | 24.7 | 0.1 | NA |
| Spot 83  | 212  | 499   | 1.1 | 6.1920  | 14.5 | 0.0713 | 17.1 | 0.0038 | 0.6 | 0.03 | 24.7 | 0.1 | 69.9 | 11.5 | 2161.0 | 299.9 | 24.7 | 0.1 | NA |
| Spot 1   | 566  | 1308  | 1.4 | 10.4992 | 7.1  | 0.0448 | 8.4  | 0.0038 | 0.5 | 0.06 | 24.7 | 0.1 | 44.5 | 3.6  | 1305.8 | 162.7 | 24.7 | 0.1 | NA |
| Spot 136 | 437  | 1105  | 0.8 | 7.6426  | 8.8  | 0.0629 | 10.8 | 0.0038 | 0.6 | 0.06 | 24.8 | 0.2 | 61.9 | 6.5  | 1935.3 | 193.5 | 24.8 | 0.2 | NA |
| Spot 64  | 417  | 1141  | 1.5 | 8.0591  | 11.0 | 0.0595 | 11.6 | 0.0039 | 0.6 | 0.05 | 24.8 | 0.2 | 58.7 | 6.6  | 1834.2 | 209.9 | 24.8 | 0.2 | NA |
| Spot 17  | 226  | 584   | 1.5 | 5.3992  | 13.5 | 0.0871 | 17.7 | 0.0039 | 0.6 | 0.03 | 24.9 | 0.1 | 84.8 | 14.4 | 2491.6 | 301.1 | 24.9 | 0.1 | NA |
| Spot 105 | 880  | 1773  | 0.8 | 12.6525 | 4.7  | 0.0378 | 9.9  | 0.0039 | 0.7 | 0.07 | 24.9 | 0.2 | 37.7 | 3.7  | 954.2  | 203.3 | 24.9 | 0.2 | NA |
| Spot 5   | 306  | 696   | 1.0 | 6.5008  | 11.0 | 0.0721 | 11.6 | 0.0039 | 0.5 | 0.04 | 24.9 | 0.1 | 70.7 | 7.9  | 2163.9 | 202.1 | 24.9 | 0.1 | NA |
| Spot 102 | 1012 | 2140  | 1.1 | 13.1560 | 4.2  | 0.0370 | 10.1 | 0.0039 | 0.5 | 0.05 | 25.0 | 0.1 | 36.9 | 3.7  | 908.1  | 208.5 | 25.0 | 0.1 | NA |
| Spot 79  | 558  | 454   | 1.1 | 9.1688  | 6.3  | 0.0415 | 26.1 | 0.0039 | 0.7 | 0.03 | 25.0 | 0.2 | 41.3 | 10.5 | 1133.7 | 527.2 | 25.0 | 0.2 | NA |
| Spot 126 | 1144 | 2162  | 1.4 | 13.6715 | 4.0  | 0.0356 | 6.7  | 0.0039 | 0.5 | 0.07 | 25.0 | 0.1 | 35.5 | 2.3  | 819.5  | 138.8 | 25.0 | 0.1 | NA |
| Spot 122 | 2842 | 1138  | 0.8 | 15.4169 | 2.7  | 0.0278 | 10.5 | 0.0039 | 0.6 | 0.06 | 25.1 | 0.2 | 27.9 | 2.9  | 278.2  | 241.2 | 25.1 | 0.2 | NA |
| Spot 16  | 320  | 822   | 0.9 | 7.7928  | 13.0 | 0.0600 | 13.6 | 0.0039 | 0.6 | 0.04 | 25.1 | 0.2 | 59.1 | 7.8  | 1827.2 | 248.3 | 25.1 | 0.2 | NA |
| Spot 116 | 511  | 1320  | 1.6 | 9.4303  | 7.5  | 0.0513 | 10.1 | 0.0039 | 0.5 | 0.05 | 25.1 | 0.1 | 50.8 | 5.0  | 1536.6 | 189.8 | 25.1 | 0.1 | NA |
| Spot 88  | 1992 | 4872  | 1.6 | 17.2391 | 2.4  | 0.0295 | 4.5  | 0.0039 | 0.7 | 0.16 | 25.1 | 0.2 | 29.6 | 1.3  | 410.5  | 99.4  | 25.1 | 0.2 | NA |
| Spot 72  | 220  | 503   | 0.9 | 6.4516  | 12.2 | 0.0691 | 17.0 | 0.0039 | 0.6 | 0.04 | 25.1 | 0.2 | 67.8 | 11.2 | 2077.4 | 301.4 | 25.1 | 0.2 | NA |
| Spot 8   | 322  | 814   | 0.8 | 7.5308  | 9.3  | 0.0625 | 12.9 | 0.0039 | 0.6 | 0.05 | 25.1 | 0.2 | 61.5 | 7.7  | 1897.5 | 232.8 | 25.1 | 0.2 | NA |
| Spot 130 | 1513 | 3699  | 1.7 | 14.7393 | 3.6  | 0.0344 | 6.7  | 0.0039 | 0.6 | 0.08 | 25.2 | 0.1 | 34.4 | 2.3  | 739.0  | 141.1 | 25.2 | 0.1 | NA |
| Spot 148 | 866  | 2035  | 1.2 | 13.3578 | 4.8  | 0.0365 | 6.1  | 0.0039 | 0.7 | 0.12 | 25.2 | 0.2 | 36.4 | 2.2  | 857.2  | 125.0 | 25.2 | 0.2 | NA |
| Spot 109 | 370  | 841   | 0.8 | 8.0341  | 9.1  | 0.0585 | 16.3 | 0.0039 | 0.5 | 0.03 | 25.2 | 0.1 | 57.7 | 9.1  | 1769.4 | 298.8 | 25.2 | 0.1 | NA |
| Spot 12  | 2994 | 5963  | 0.6 | 17.3819 | 1.9  | 0.0296 | 3.6  | 0.0039 | 0.7 | 0.18 | 25.2 | 0.2 | 29.6 | 1.0  | 404.2  | 79.1  | 25.2 | 0.2 | NA |
| Spot 66  | 621  | 1634  | 1.3 | 11.1916 | 6.6  | 0.0437 | 11.7 | 0.0039 | 0.7 | 0.06 | 25.3 | 0.2 | 43.4 | 5.0  | 1212.8 | 230.0 | 25.3 | 0.2 | NA |
| Spot 42  | 1665 | 4586  | 1.2 | 14.9868 | 3.8  | 0.0344 | 5.2  | 0.0039 | 0.6 | 0.12 | 25.3 | 0.2 | 34.3 | 1.8  | 723.7  | 109.4 | 25.3 | 0.2 | NA |
| Spot 23  | 549  | 1417  | 0.7 | 10.7837 | 9.1  | 0.0449 | 10.2 | 0.0039 | 0.6 | 0.06 | 25.3 | 0.2 | 44.6 | 4.5  | 1264.3 | 199.7 | 25.3 | 0.2 | NA |
| Spot 117 | 2342 | 5079  | 1.0 | 16.9857 | 2.6  | 0.0303 | 5.4  | 0.0039 | 0.5 | 0.10 | 25.3 | 0.1 | 30.3 | 1.6  | 449.9  | 119.1 | 25.3 | 0.1 | NA |
| Spot 146 | 523  | 1255  | 1.7 | 8.5875  | 8.0  | 0.0571 | 10.9 | 0.0039 | 0.6 | 0.06 | 25.3 | 0.2 | 56.4 | 6.0  | 1719.4 | 200.5 | 25.3 | 0.2 | NA |
| Spot 29  | 725  | 1761  | 1.7 | 12.1762 | 6.4  | 0.0401 | 7.7  | 0.0039 | 0.6 | 0.08 | 25.4 | 0.2 | 39.9 | 3.0  | 1038.0 | 155.0 | 25.4 | 0.2 | NA |
| Spot 115 | 708  | 1606  | 0.7 | 12.0702 | 5.8  | 0.0402 | 13.2 | 0.0040 | 0.6 | 0.05 | 25.4 | 0.2 | 40.1 | 5.2  | 1038.3 | 267.0 | 25.4 | 0.2 | NA |
| Spot 57  | 441  | 1197  | 0.8 | 9.1716  | 8.1  | 0.0531 | 9.5  | 0.0040 | 0.5 | 0.06 | 25.4 | 0.1 | 52.5 | 4.9  | 1575.9 | 178.0 | 25.4 | 0.1 | NA |
| Spot 63  | 609  | 1660  | 1.4 | 9.7484  | 7.0  | 0.0515 | 8.8  | 0.0040 | 0.5 | 0.06 | 25.6 | 0.1 | 51.0 | 4.4  | 1510.1 | 166.0 | 25.6 | 0.1 | NA |
| Spot 132 | 910  | 2290  | 1.5 | 13.1931 | 4.8  | 0.0381 | 8.5  | 0.0040 | 0.6 | 0.07 | 25.6 | 0.1 | 37.9 | 3.1  | 913.9  | 173.8 | 25.6 | 0.1 | NA |
| Spot 43  | 243  | 658   | 1.1 | 6.4838  | 11.2 | 0.0734 | 13.3 | 0.0040 | 0.5 | 0.04 | 25.6 | 0.1 | 71.9 | 9.2  | 2151.0 | 233.2 | 25.6 | 0.1 | NA |
| Spot 123 | 177  | 532   | 1.0 | 5.5260  | 15.3 | 0.0859 | 16.3 | 0.0040 | 0.6 | 0.04 | 25.6 | 0.1 | 83.7 | 13.1 | 2421.2 | 279.3 | 25.6 | 0.1 | NA |
| Spot 111 | 638  | 1426  | 1.0 | 11.7810 | 7.0  | 0.0410 | 9.6  | 0.0040 | 0.6 | 0.06 | 25.6 | 0.1 | 40.8 | 3.8  | 1064.6 | 192.7 | 25.6 | 0.1 | NA |
| Spot 15  | 184  | 547   | 1.2 | 5.6514  | 15.1 | 0.0841 | 16.7 | 0.0040 | 0.6 | 0.04 | 25.6 | 0.2 | 82.0 | 13.2 | 2384.0 | 287.3 | 25.6 | 0.2 | NA |
| Spot 49  | 1068 | 2991  | 0.6 | 13.3169 | 5.9  | 0.0385 | 6.4  | 0.0040 | 0.6 | 0.09 | 25.6 | 0.1 | 38.4 | 2.4  | 935.0  | 130.4 | 25.6 | 0.1 | NA |
| Spot 50  | 664  | 1111  | 1.1 | 11.4584 | 5.6  | 0.0408 | 10.0 | 0.0040 | 0.6 | 0.06 | 25.6 | 0.1 | 40.6 | 4.0  | 1051.0 | 202.1 | 25.6 | 0.1 | NA |
| Spot 54  | 1479 | 3649  | 1.6 | 15.9255 | 2.4  | 0.0323 | 2.9  | 0.0040 | 0.5 | 0.18 | 25.6 | 0.1 | 32.3 | 0.9  | 559.3  | 62.5  | 25.6 | 0.1 | NA |
| Spot 25  | 4439 | 10921 | 0.8 | 19.1633 | 1.3  | 0.0279 | 2.9  | 0.0040 | 0.7 | 0.24 | 25.6 | 0.2 | 27.9 | 0.8  | 228.7  | 64.8  | 25.6 | 0.2 | NA |
| Spot 92  | 284  | 686   | 1.3 | 5.7385  | 13.1 | 0.0855 | 14.0 | 0.0040 | 0.6 | 0.04 | 25.6 | 0.1 | 83.3 | 11.2 | 2407.7 | 239.2 | 25.6 | 0.1 | NA |
| Spot 110 | 2331 | 4849  | 1.3 | 16.8986 | 2.1  | 0.0309 | 2.6  | 0.0040 | 0.6 | 0.21 | 25.7 | 0.1 | 30.9 | 0.8  | 458.0  | 57.2  | 25.7 | 0.1 | NA |
| Spot 46  | 262  | 671   | 1.1 | 6.2083  | 12.9 | 0.0377 | 18.5 | 0.0040 | 0.6 | 0.03 | 25.7 | 0.2 | 76.0 | 13.5 | 2244.1 | 322.0 | 25.7 | 0.2 | NA |
| Spot 58  | 1852 | 3999  | 1.4 | 15.1269 | 2.9  | 0.0345 | 4.2  | 0.0040 | 0.5 | 0.12 | 25.8 | 0.1 | 34.4 | 1.4  | 690.6  | 88.8  | 25.8 | 0.1 | NA |
| Spot 95  | 932  | 2412  | 1.1 | 11.3807 | 5.2  | 0.0453 | 7.3  | 0.0040 | 0.6 | 0.08 | 25.8 | 0.2 | 45.0 | 3.2  | 1246.3 | 141.9 | 25.8 | 0.2 | NA |
| Spot 37  | 1834 | 3063  | 1.5 | 15.7208 | 3.1  | 0.0325 | 6.8  | 0.0040 | 0.6 | 0.09 | 25.8 | 0.2 | 32.5 | 2.2  | 561.1  | 148.6 | 25.8 | 0.2 | NA |
| Spot 34  | 515  | 1297  | 1.0 | 9.2500  | 7.4  | 0.0538 | 10.0 | 0.0040 | 0.8 | 0.08 | 25.8 | 0.2 | 53.2 | 5.2  | 1575.1 | 186.9 | 25.8 | 0.2 | NA |
| Spot 139 | 1222 | 2947  | 1.7 | 14.8127 | 3.7  | 0.0345 | 4.9  | 0.0040 | 0.9 | 0.17 | 25.8 | 0.2 | 34.5 | 1.7  | 691.0  | 103.6 | 25.8 | 0.2 | NA |
| Spot 6   | 731  | 1528  | 0.6 | 10.1088 | 7.2  | 0.0497 | 8.0  | 0.0040 | 0.5 |      |      |     |      |      |        |       |      |     |    |

|          |      |       |     |         |      |         |      |        |     |      |        |      |        |      |        |       |      |     |     |
|----------|------|-------|-----|---------|------|---------|------|--------|-----|------|--------|------|--------|------|--------|-------|------|-----|-----|
| Spot 106 | 250  | 744   | 1.0 | 4.9912  | 18.0 | 0.1050  | 18.5 | 0.0041 | 0.6 | 0.03 | 26.7   | 0.2  | 101.4  | 17.9 | 2687.1 | 308.9 | 26.7 | 0.2 | NA  |
| Spot 86  | 600  | 1596  | 1.5 | 10.8307 | 5.9  | 0.0479  | 8.0  | 0.0042 | 0.6 | 0.08 | 26.9   | 0.2  | 47.5   | 3.7  | 1275.1 | 156.0 | 26.9 | 0.2 | NA  |
| Spot 48  | 482  | 1252  | 1.2 | 9.6517  | 7.9  | 0.0534  | 9.5  | 0.0042 | 0.7 | 0.07 | 27.0   | 0.2  | 52.8   | 4.9  | 1474.9 | 181.0 | 27.0 | 0.2 | NA  |
| Spot 41  | 657  | 1577  | 0.9 | 11.1606 | 8.6  | 0.0466  | 10.1 | 0.0042 | 0.5 | 0.05 | 27.0   | 0.1  | 46.2   | 4.6  | 1209.0 | 198.7 | 27.0 | 0.1 | NA  |
| Spot 149 | 132  | 341   | 1.2 | 5.0403  | 18.6 | 0.0932  | 22.9 | 0.0042 | 0.5 | 0.02 | 27.0   | 0.1  | 90.5   | 19.8 | 2465.0 | 392.7 | 27.0 | 0.1 | NA  |
| Spot 143 | 690  | 1702  | 1.0 | 12.4683 | 5.2  | 0.0418  | 7.7  | 0.0042 | 0.6 | 0.08 | 27.3   | 0.2  | 41.6   | 3.1  | 973.8  | 156.1 | 27.3 | 0.2 | NA  |
| Spot 24  | 1466 | 4172  | 1.9 | 14.6903 | 4.1  | 0.0378  | 5.9  | 0.0043 | 0.8 | 0.14 | 27.4   | 0.2  | 37.7   | 2.2  | 757.3  | 123.4 | 27.4 | 0.2 | NA  |
| Spot 93  | 208  | 512   | 1.4 | 6.9778  | 15.3 | 0.0689  | 23.1 | 0.0043 | 0.6 | 0.03 | 27.5   | 0.2  | 67.6   | 15.1 | 1909.8 | 420.5 | 27.5 | 0.2 | NA  |
| Spot 129 | 1328 | 3948  | 1.8 | 13.8682 | 4.4  | 0.0405  | 5.0  | 0.0043 | 0.6 | 0.12 | 27.6   | 0.2  | 40.3   | 2.0  | 882.2  | 102.7 | 27.6 | 0.2 | NA  |
| Spot 4   | 934  | 1103  | 2.4 | 11.6784 | 5.3  | 0.0435  | 12.4 | 0.0043 | 0.6 | 0.04 | 27.9   | 0.2  | 43.2   | 5.2  | 1005.2 | 251.3 | 27.9 | 0.2 | NA  |
| Spot 100 | 289  | 898   | 2.1 | 7.4154  | 10.3 | 0.0721  | 10.8 | 0.0044 | 0.7 | 0.07 | 28.0   | 0.2  | 70.6   | 7.4  | 1955.3 | 193.8 | 28.0 | 0.2 | NA  |
| Spot 27  | 263  | 769   | 0.8 | 7.3076  | 10.1 | 0.0731  | 13.0 | 0.0045 | 0.5 | 0.04 | 28.6   | 0.1  | 71.7   | 9.0  | 1943.4 | 233.4 | 28.6 | 0.1 | NA  |
| Spot 91  | 417  | 1069  | 2.3 | 9.5164  | 7.6  | 0.0570  | 8.3  | 0.0045 | 0.5 | 0.06 | 28.9   | 0.1  | 56.2   | 4.5  | 1466.5 | 157.3 | 28.9 | 0.1 | NA  |
| Spot 90  | 350  | 1019  | 1.5 | 9.3946  | 7.7  | 0.0574  | 11.3 | 0.0045 | 0.6 | 0.05 | 28.9   | 0.2  | 56.7   | 6.2  | 1481.6 | 214.8 | 28.9 | 0.2 | NA  |
| Spot 7   | 1012 | 2871  | 1.7 | 13.4027 | 4.0  | 0.0437  | 7.0  | 0.0046 | 0.5 | 0.07 | 29.3   | 0.1  | 43.5   | 3.0  | 917.8  | 143.9 | 29.3 | 0.1 | NA  |
| Spot 97  | 1034 | 3632  | 2.2 | 13.5544 | 4.1  | 0.0442  | 6.3  | 0.0046 | 0.6 | 0.10 | 29.6   | 0.2  | 43.9   | 2.7  | 923.7  | 127.9 | 29.6 | 0.2 | NA  |
| Spot 85  | 349  | 920   | 1.4 | 8.1026  | 10.7 | 0.0707  | 11.5 | 0.0047 | 0.7 | 0.06 | 30.5   | 0.2  | 69.4   | 7.7  | 1770.8 | 210.9 | 30.5 | 0.2 | NA  |
| Spot 73  | 660  | 1755  | 0.8 | 11.0596 | 5.5  | 0.0624  | 10.5 | 0.0055 | 0.7 | 0.07 | 35.4   | 0.3  | 61.5   | 6.3  | 1252.3 | 205.6 | 35.4 | 0.3 | NA  |
| Spot 74  | 1634 | 16803 | 4.0 | 19.5851 | 1.3  | 0.1148  | 1.8  | 0.0166 | 0.6 | 0.32 | 106.3  | 0.6  | 110.3  | 1.9  | 199.2  | 40.4  | 106  | 0.6 | NA  |
| Spot 33  | 723  | 6279  | 1.2 | 18.1843 | 1.3  | 0.1707  | 1.8  | 0.0235 | 0.5 | 0.27 | 150.0  | 0.7  | 160.0  | 2.7  | 311.7  | 39.8  | 150  | 0.7 | NA  |
| Spot 142 | 272  | 5179  | 1.2 | 16.3501 | 2.7  | 0.1985  | 4.2  | 0.0248 | 0.7 | 0.16 | 157.6  | 1.0  | 183.9  | 7.0  | 537.3  | 89.7  | 158  | 1.0 | NA  |
| Spot 121 | 188  | 2866  | 1.9 | 13.7202 | 4.6  | 0.2334  | 6.1  | 0.0250 | 0.5 | 0.09 | 159.2  | 0.8  | 213.0  | 11.7 | 860.0  | 126.5 | 159  | 0.8 | NA  |
| Spot 2   | 363  | 5594  | 1.5 | 16.6552 | 2.2  | 0.2000  | 3.4  | 0.0252 | 0.5 | 0.15 | 160.7  | 0.8  | 185.1  | 5.7  | 510.9  | 73.5  | 161  | 0.8 | NA  |
| Spot 99  | 272  | 4185  | 1.2 | 14.9544 | 3.2  | 0.2217  | 4.0  | 0.0254 | 0.6 | 0.14 | 161.4  | 0.9  | 203.3  | 7.4  | 722.7  | 84.8  | 161  | 0.9 | NA  |
| Spot 89  | 480  | 7966  | 1.2 | 17.6457 | 1.9  | 0.1916  | 3.0  | 0.0254 | 0.5 | 0.18 | 161.5  | 0.9  | 178.0  | 5.0  | 403.6  | 67.2  | 161  | 0.9 | NA  |
| Spot 61  | 312  | 4830  | 1.3 | 15.2884 | 2.4  | 0.2195  | 4.0  | 0.0255 | 0.8 | 0.20 | 162.6  | 1.3  | 201.5  | 7.3  | 687.0  | 83.2  | 163  | 1.3 | NA  |
| Spot 104 | 1524 | 22914 | 1.6 | 19.6204 | 0.9  | 0.1786  | 1.3  | 0.0258 | 0.6 | 0.50 | 164.0  | 1.0  | 166.9  | 1.9  | 208.0  | 25.5  | 164  | 1.0 | NA  |
| Spot 65  | 264  | 3193  | 1.3 | 14.8268 | 3.8  | 0.2236  | 6.2  | 0.0258 | 0.9 | 0.15 | 164.2  | 1.5  | 204.9  | 11.4 | 704.1  | 129.8 | 164  | 1.5 | NA  |
| Spot 21  | 827  | 11589 | 1.4 | 18.8526 | 1.2  | 0.1852  | 1.7  | 0.0259 | 0.5 | 0.31 | 165.0  | 0.9  | 172.5  | 2.7  | 277.8  | 37.7  | 165  | 0.9 | NA  |
| Spot 53  | 371  | 6451  | 1.0 | 17.1105 | 2.2  | 0.2007  | 4.5  | 0.0259 | 0.5 | 0.12 | 165.1  | 0.9  | 185.7  | 7.7  | 457.7  | 99.9  | 165  | 0.9 | NA  |
| Spot 56  | 498  | 8065  | 1.7 | 17.5311 | 1.9  | 0.1976  | 2.9  | 0.0260 | 0.7 | 0.24 | 165.2  | 1.2  | 183.1  | 4.9  | 421.0  | 63.8  | 165  | 1.2 | NA  |
| Spot 62  | 321  | 5118  | 1.6 | 15.9789 | 2.5  | 0.2150  | 4.6  | 0.0261 | 0.6 | 0.13 | 166.3  | 1.0  | 197.8  | 8.3  | 593.0  | 99.3  | 166  | 1.0 | NA  |
| Spot 82  | 796  | 12392 | 2.1 | 19.1836 | 1.3  | 0.1861  | 2.6  | 0.0266 | 0.5 | 0.21 | 169.3  | 0.9  | 173.3  | 4.2  | 229.3  | 59.2  | 169  | 0.9 | NA  |
| Spot 78  | 662  | 7386  | 1.0 | 17.8629 | 1.6  | 0.1979  | 3.0  | 0.0267 | 0.6 | 0.20 | 169.7  | 1.0  | 183.4  | 5.0  | 365.0  | 65.3  | 170  | 1.0 | NA  |
| Spot 101 | 302  | 4044  | 1.1 | 15.1754 | 3.0  | 0.2327  | 4.8  | 0.0271 | 0.5 | 0.11 | 172.3  | 0.9  | 212.5  | 9.3  | 685.6  | 103.0 | 172  | 0.9 | NA  |
| Spot 119 | 522  | 9029  | 1.6 | 17.7764 | 1.8  | 0.2039  | 3.1  | 0.0271 | 0.5 | 0.17 | 172.6  | 0.9  | 188.4  | 5.4  | 392.4  | 68.8  | 173  | 0.9 | NA  |
| Spot 120 | 479  | 9079  | 1.3 | 17.2413 | 2.0  | 0.2109  | 2.9  | 0.0272 | 0.7 | 0.23 | 173.0  | 1.1  | 194.3  | 5.1  | 463.1  | 61.8  | 173  | 1.1 | NA  |
| Spot 14  | 510  | 8268  | 1.3 | 17.4924 | 2.1  | 0.2076  | 3.3  | 0.0272 | 0.5 | 0.15 | 173.1  | 0.8  | 191.5  | 5.7  | 426.1  | 72.1  | 173  | 0.8 | NA  |
| Spot 35  | 547  | 7439  | 1.4 | 17.6898 | 1.8  | 0.2048  | 3.1  | 0.0272 | 0.5 | 0.17 | 173.2  | 0.9  | 189.2  | 5.3  | 393.8  | 68.5  | 173  | 0.9 | NA  |
| Spot 39  | 395  | 4880  | 1.0 | 16.8999 | 2.0  | 0.2109  | 2.8  | 0.0273 | 0.6 | 0.22 | 173.5  | 1.1  | 194.3  | 4.9  | 455.8  | 60.3  | 173  | 1.1 | NA  |
| Spot 76  | 494  | 7053  | 1.7 | 17.7615 | 2.0  | 0.2035  | 2.6  | 0.0273 | 0.6 | 0.21 | 173.7  | 1.0  | 188.1  | 4.5  | 374.4  | 57.6  | 174  | 1.0 | NA  |
| Spot 18  | 802  | 11680 | 1.2 | 18.8683 | 1.4  | 0.1946  | 1.9  | 0.0273 | 0.5 | 0.26 | 173.7  | 0.9  | 180.6  | 3.1  | 272.0  | 41.8  | 174  | 0.9 | NA  |
| Spot 108 | 455  | 2966  | 1.6 | 17.6289 | 2.1  | 0.1951  | 4.5  | 0.0274 | 0.5 | 0.12 | 174.0  | 0.9  | 181.0  | 7.5  | 274.4  | 102.8 | 174  | 0.9 | NA  |
| Spot 3   | 482  | 7726  | 1.5 | 17.4445 | 1.7  | 0.2093  | 2.3  | 0.0274 | 0.5 | 0.24 | 174.1  | 0.9  | 193.0  | 4.0  | 430.7  | 49.3  | 174  | 0.9 | NA  |
| Spot 96  | 826  | 13068 | 1.5 | 18.9020 | 1.4  | 0.1964  | 2.0  | 0.0275 | 0.8 | 0.43 | 174.9  | 1.5  | 182.0  | 3.3  | 276.4  | 40.8  | 175  | 1.5 | NA  |
| Spot 107 | 3145 | 8247  | 2.1 | 18.9059 | 0.9  | 0.2187  | 1.4  | 0.0311 | 0.8 | 0.58 | 197.3  | 1.6  | 200.9  | 2.6  | 243.9  | 27.2  | 197  | 1.6 | NA  |
| Spot 140 | 920  | 16011 | 1.8 | 19.5983 | 1.0  | 0.2335  | 1.3  | 0.0339 | 0.5 | 0.41 | 214.7  | 1.1  | 213.1  | 2.6  | 196.3  | 28.4  | 215  | 1.1 | NA  |
| Spot 138 | 1852 | 34136 | 2.9 | 19.3243 | 1.2  | 0.2428  | 1.6  | 0.0344 | 1.0 | 0.63 | 217.9  | 2.2  | 220.7  | 3.3  | 251.6  | 29.4  | 218  | 2.2 | NA  |
| Spot 150 | 2298 | 45679 | 2.8 | 19.5014 | 0.7  | 0.2416  | 1.0  | 0.0345 | 0.6 | 0.63 | 218.6  | 1.3  | 219.7  | 1.9  | 232.3  | 17.4  | 219  | 1.3 | NA  |
| Spot 113 | 1529 | 29928 | 2.7 | 19.4265 | 0.9  | 0.2426  | 1.1  | 0.0346 | 0.6 | 0.55 | 219.0  | 1.4  | 220.6  | 2.3  | 238.6  | 22.1  | 219  | 1.4 | NA  |
| Spot 77  | 2622 | 65572 | 2.2 | 19.6599 | 0.7  | 0.2406  | 0.9  | 0.0346 | 0.5 | 0.58 | 219.1  | 1.2  | 218.9  | 1.9  | 218.3  | 17.8  | 219  | 1.2 | NA  |
| Spot 10  | 2036 | 41942 | 3.3 | 19.5173 | 0.7  | 0.2432  | 0.9  | 0.0347 | 0.6 | 0.62 | 219.9  | 1.3  | 221.0  | 1.9  | 234.2  | 17.0  | 220  | 1.3 | NA  |
| Spot 31  | 899  | 2956  | 2.1 | 17.3592 | 1.7  | 0.2517  | 7.5  | 0.0348 | 0.6 | 0.09 | 220.3  | 1.4  | 228.0  | 15.3 | 309.3  | 169.7 | 220  | 1.4 | NA  |
| Spot 103 | 1878 | 37748 | 3.6 | 19.5797 | 0.8  | 0.2433  | 1.0  | 0.0348 | 0.6 | 0.58 | 220.8  | 1.3  | 221.1  | 2.0  | 226.1  | 19.1  | 221  | 1.3 | NA  |
| Spot 11  | 1566 | 33501 | 2.8 | 19.5778 | 0.8  | 0.2437  | 1.2  | 0.0350 | 0.6 | 0.50 | 222.1  | 1.3  | 221.5  | 2.3  | 215.9  | 23.5  | 222  | 1.3 | NA  |
| Spot 94  | 1478 | 17919 | 2.8 | 19.4328 | 0.9  | 0.2447  | 1.6  | 0.0351 | 0.7 | 0.44 | 222.1  | 1.5  | 222.3  | 3.2  | 225.0  | 33.0  | 222  | 1.5 | NA  |
| Spot 68  | 1454 | 19255 | 2.9 | 19.3653 | 0.8  | 0.2468  | 1.1  | 0.0352 | 0.6 | 0.53 | 223.2  | 1.3  | 224.0  | 2.2  | 233.8  | 21.0  | 223  | 1.3 | NA  |
| Spot 124 | 1250 | 17224 | 2.2 | 18.9637 | 0.8  | 0.2521  | 1.2  | 0.0353 | 0.5 | 0.37 | 223.5  | 1.0  | 228.3  | 2.5  | 278.2  | 26.3  | 224  | 1.0 | NA  |
| Spot 38  | 2447 | 43842 | 1.5 | 19.6559 | 0.7  | 0.2468  | 0.9  | 0.0355 | 0.5 | 0.57 | 224.6  | 1.1  | 224.0  | 1.8  | 217.9  | 17.2  | 225  | 1.1 | NA  |
| Spot 81  | 1036 | 19090 | 2.0 | 19.1179 | 1.0  | 0.2516  | 1.6  | 0.0355 | 0.6 | 0.39 | 224.9  | 1.4  | 227.8  | 3.4  | 259.4  | 34.9  | 225  | 1.4 | NA  |
| Spot 30  | 2675 | 62171 | 2.4 | 19.6183 | 0.7  | 0.2489  | 0.9  | 0.0357 | 0.6 | 0.61 | 225.9  | 1.3  | 225.7  | 1.9  | 224.3  | 17.3  | 226  | 1.3 | NA  |
| Spot 75  | 3421 | 69812 | 2.1 | 19.5897 | 0.6  | 0.2500  | 0.8  | 0.0358 | 0.5 | 0.64 | 226.6  | 1.2  | 226.5  | 1.7  | 227.2  | 14.9  | 227  | 1.2 | NA  |
| Spot 69  | 1243 | 27910 | 2.3 | 19.2961 | 0.9  | 0.2531  | 1.2  | 0.0358 | 0.7 | 0.54 | 226.8  | 1.5  | 229.1  | 2.5  | 254.4  | 23.4  | 227  | 1.5 | NA  |
| Spot 20  | 3308 | 79302 | 2.8 | 19.6703 | 0.6  | 0.2526  | 0.8  | 0.0361 | 0.5 | 0.63 | 228.9  | 1.2  | 228.7  | 1.7  | 227.2  | 15.2  | 229  | 1.2 | NA  |
| Spot 135 | 1262 | 28901 | 2.3 | 19.3160 | 1.2  | 0.2581  | 1.8  | 0.0366 | 1.0 | 0.54 | 231.4  | 2.2  | 233.1  | 3.8  | 251.1  | 35.0  | 231  | 2.2 | NA  |
| Spot 60  | 233  | 81321 | 2.0 | 4.1998  | 0.6  | 20.4790 | 0.8  | 0.6248 | 0.6 | 0.70 | 3129.0 | 14.4 | 3114.3 | 8.0  | 3105.5 | 9.3   | 3105 | 9.3 | 101 |

## **Supplemental Data (Miller, Raftrey and Lund Snee)**

### **Appendix S1**

#### **Description of samples and calculation of Maximum Depositional Ages (MDA)**

Detrital zircon samples were processed using standard zircon separation techniques involving crushing, grinding, Gemini water table concentration of high-density components, magnetic separation and density separation. Concentrated zircon separates were mounted at the University of Arizona Department of Geosciences LaserChron Center. Mounted separates were imaged by BSE for zircon identification. The primary standard for all samples was Sri Lanka (SL) zircon (563 Ma  $^{206}\text{Pb}/^{238}\text{U}$  age). Samples were run in two sessions, both on a Nu Plasma HR multicollector ICPMS with a Photon Machines G2 excimer laser. Between 100 and 150 zircon grains were analyzed from detrital zircon samples, and ~25 zircons were analyzed from tuff samples. All analyses used a 30  $\mu\text{m}$  laser spot. Grains were selected for analysis by a random walk transect across the BSE images. Data reduction for the first set of analyses was done using the Laserchron agecalc excel program. Data from the second session were reduced using the Nutragecalc program of Sundell (2019). Kernel density estimate plots were created using the IsoplotR program of Vermeesch (2018) and are shown in Figures S1, S3 and S5. We report  $^{206}\text{Pb}/^{238}\text{U}$  results for ages less than 900 Ma and  $^{206}\text{Pb}/^{207}\text{Pb}$  ages for older zircons. Results were excluded from further analysis based on  $> 600$  CPS  $^{204}\text{Pb}$ ,  $>10\%$  uncertainty in  $^{206}\text{Pb}/^{238}\text{U}$  and  $^{206}\text{Pb}/^{207}\text{Pb}$  ages,  $>20\%$  discordance and  $>10\%$  reverse discordance in ages  $> 600$  Ma. Supplemental Data Table S1 lists results used in our discussion of the data.

A benefit of measuring detrital zircon U-Pb age distributions is that results can be used to place a maximum bound upon the depositional age of the sample following Dickinson and Gehrels (2009). While there are various statistical methods that can be applied to systematically calculate the maximum depositional age bound for a detrital zircon sample, it should be borne in mind that none of these guarantee that an MDA will approximate the true depositional age of a sample because the youngest grains could be far older than the age of deposition of their host rocks. From a general geologic perspective, however, volcanism was semi-continuous from the Eocene to the present-day across much of what was to become the Basin and Range Province (Fig. 2) so that the likelihood of sediments deposited during that age

span being much younger than their youngest included zircons is likely small, but still quite possible. In most cases, the weighted mean of a small set of young grains overlapping in age within  $1\sigma$  error (YC $1\sigma$ ) is reported as the MDA. The grains selected for estimating each MDA were chosen such that grain ages overlap within  $1\sigma$  error of each other, they form a discrete cluster of ages from the rest of the young ages, and they do not have high U (an indicator of possible radiation damage and consequent lead loss). Further evaluation of whether a given set of young ages represents a discrete group comes from their U/Th ratios, which can be affected by crustal heritage or interaction with metamorphic fluids. If the U/Th ratios of grains forming the YC $1\sigma$  group are appreciably different from those of the rest of the young ages, this supports considering them as a discrete group and the ability to use their weighted mean as the MDA for the sample. In cases where there is no set of overlapping young ages, the youngest single grain (YSG) from a set of detrital zircon ages is used as an estimate of the MDA (see Dickinson and Gehrels, 2009). We emphasize that the YSG age is the least reliable of the methods used here and is only used where the youngest single grain does not have high U which is a measure of potential radiation damage and thus lead loss.

The following section describes the location of each of the samples and the basis for determination of the MDA's (Figs. S2, 4, 6) shown in the stratigraphic columns of Figure 4 of the main text. The most important consideration is that the volcanic highlands that sourced the zircons become younger southward with time, thus it would be difficult for a younger sediment to include only older zircon as the river system that transported the sediments would have to traverse younger volcanic rocks on their way to Death Valley. The following text and figures describe the location of our samples and the basis for determination of the MDA's or preferred ages shown in the stratigraphic columns of Figure 4 of the main text.

### **A. Titus Canyon Reference Section, Grapevine Mountains**

Seven samples were analyzed from the Titus Canyon Formation reference section (Table S1, Fig. 5-geomap) initially described by Reynolds (1969) and then mapped and discussed by Snow and Lux (1999) and Niemi (2002). Following the unit reassignments of Snow and Lux (1999) and Niemi (2002), one of these samples is now considered part of the Panuga Formation, and another is from the Wahguyhe Formation (Fig. 5-geomap).

The section unconformably overlies Cambrian limestone of the Bonanza King Formation at the head of Titus Canyon (Fig. 5-geomap).

A sample from red bed sandstones interlayered with the top of the basal sedimentary breccia within meters of the base of the formation (Fig. 5-geomap) (ELM18DVTC-8,  $n=147$ ) yielded zircons as young as  $66.2 \pm 7.5$  Ma with prominent age peaks at 90 Ma, 163 Ma, 174 Ma and 223 Ma (Fig. S1). The youngest grain with an age of  $66.2 \pm 7.5$  Ma does not form a coherent group with any other grains from this sample. Its uranium concentration and U/Th value do not differ from those of the next youngest group of grains, and thus do not support considering this grain as part of a separate population. The next two youngest grains (spots 55 and 105, Table S1) yield a weighted mean age of  $86.8 \pm 0.7$  Ma (MSWD = 0.19) (Fig. S2). These grains do not overlap with the ages of the next oldest grain within uncertainty, and they have U/Th values that overlap within error of each other but are lower than and do not overlap those of the next youngest grains. Also, uranium concentrations are not systematically different from other young grains, suggesting that lead loss is not a factor in these ages. Accordingly,  $86.8 \pm 0.7$  Ma is the preferred maximum depositional age for these sediments deposited at the very base of the Titus Canyon Formation. These strata are thus bracketed in age between the Late Cretaceous and the Late Middle Eocene age of the oldest fossils reported for the Titus Canyon Formation (Lander, 2019). Proterozoic grains are present (Fig. S1) but do not constitute a significant fraction of the sample ( $n=13$ ). They lie between 1050 Ma and 1873 Ma and have minor groups at 1076 Ma, 1372 Ma and 1780 Ma.

Sample ELM18DVTC-1, although located some distance away from ELM18DVTC-8 (Fig. 5-geomap), is inferred to lie stratigraphically above ELM18DVTC-8 because it was sampled from sandstone interbedded with conglomerate that contains abundant well-rounded black chert pebbles, signaling an abrupt change in source area and sediment delivery rate. It contains only two Cenozoic grains, which do not overlap in age within error (Figs. S1, S2). The youngest grain has comparable uranium and U/Th values to the other Cenozoic grain (Fig. S2). The uranium concentration of the youngest grain is not significantly different from that of comparably aged grains from other samples collected in the section, suggesting that lead loss is not a factor in the age of this grain. Hence, the age of the youngest grain ( $36.27 \pm 0.18$  Ma) is

considered a preferred MDA for this sample (Fig. S2). Overall, major peaks occur at 163 Ma and 174 Ma, with fewer grains at 38 Ma ( $n = 2$ ), 90 Ma, 107 Ma, 221 Ma and 227 Ma (Fig. S1). Only three Proterozoic grains were dated at 1099 Ma, 1773 Ma and 2094 Ma (Fig. S1).

Sample ELM18DVTC-2 ( $n=116$ ) (Fig. 5-geomap) from sandstone interbedded with chert pebble conglomerate has a youngest age peak at 35 Ma and few Mesozoic grains (Fig. S1). The youngest grain in this sample ( $25.9 \pm 0.1$  Ma) is not considered an accurate MDA based on a lack of other overlapping grains, high  $^{204}\text{Pb}$  and low  $^{206}\text{Pb}/^{204}\text{Pb}$  (Table S1). An MDA of  $33.0 \pm 0.3$  Ma was calculated from an overlapping group of 3 grains (Fig. S2). These grains form a unique peak on the KDE of the Cenozoic ages, have similar U/Th values and do not have especially high uranium measurements. Grains younger than those used for the MDA calculation for this sample that overlap in age do not form groups of more than two grains, do not have U/Th values that suggest they are of a distinct population, or they include a grain (spot 81, Table S1) with high uranium relative to other grains that suggests it may have experienced lead loss. Small Paleozoic-Precambrian peaks occur at 409 Ma, 1138 Ma and 1802 Ma (Fig. S2).

The next sample collected above this in the section, ELM18DVTC-6 ( $n=114$ ) (Fig. 5-geomap) was from the top of a series of coarse massive sandstone beds that are greenish in color due to celadonitic alteration. This sample has prominent Cenozoic and Mesozoic age peaks at 34 Ma and 160 Ma, with sparse grains yielding ages between these two maxima (Fig. S1). An MDA of  $32.3 \pm 0.3$  Ma was estimated from a weighted average of two overlapping grains with identical U/Th and no evidence of lead loss. The youngest grain from this sample is  $29.9 \pm 0.2$  Ma and does not have evidence for lead loss (Fig. S2) but does not overlap in age within error of any other grains. Older grains form larger coherent overlapping age groups, but these are older than the MDA of the stratigraphically lower sample ELM18DVTC-2 (Fig. S2). Sample ELM18DVTC-6 has the most Proterozoic grains of all samples dated in the reference section ( $n=30$ ), and these older zircons define peaks at 478 Ma, 1085 Ma and 1776 Ma (Fig. S1).

ELM18DVTC-7 ( $n=116$ ) is the stratigraphically highest sample analyzed from the Titus Canyon Formation in the reference section (Fig. 5-geomap) (the highest part of the variegated facies of the Titus Canyon Formation of Reynolds, 1969). The sample comes

from fine-grained sandstone interlayered with slightly calcareous siltstone and silty limestone likely deposited in a lacustrine environment. The YC1 $\sigma$  contains only two grains whose weighted average age ( $22.7 \pm 0.2$  Ma) has an MSWD > 1 (2.3), and whose U/Th ratios are dissimilar. A group of 11 grains that overlap at 1 $\sigma$  yield an MDA of  $23.7 \pm 0.1$  Ma (MSWD = 0.47), making this the preferred MDA for the sample (Fig. S2). The youngest single grain age is  $7.0 \pm 0.04$  Ma but is rejected based on high  $^{204}\text{Pb}$  and low  $^{206}\text{Pb}/^{204}\text{Pb}$  (spot 110, Table S1).

One sample (ELM18DVTC-10, n=145) was analyzed from the overlying Panuga Formation of Niemi (2002) or green unit of Reynolds (1969) (Fig. 5-geomap). The sample is inferred to come from the “crystal marker tuff” near the top of the Panuga Formation of Niemi (2002). Snow and Lux (1999) dated the tuff as 15.7 Ma by the  $^{40}\text{Ar}/^{39}\text{Ar}$  method on sanidine. It has a dominant age peak of 16 Ma (Fig. S1). The YC1 $\sigma$  MDA is  $10.8 \pm 0.1$  Ma (MSWD = 0.0017, n=2). The youngest single grain age of 0.07 Ma (spot 72, Table S1) is considered erroneous because of maximum depositional age constraints of overlying units. We interpret 16 Ma as the MDA for this sample based on existing geochronology and the age of overlying units, but use the preferred age of 15.7 Ma reported on by Snow and Lux (1999) and Niemi (2002).

The stratigraphically highest sample analyzed, ELM18DVTC-12 (n=17) (Fig. 5-geomap), is from a reworked air fall tuff deposited in a lacustrine environment within the overlying basal units of the Wahguyhe Formation (Niemi, 2002) and has an age peak of 15 Ma (Fig. S1). It has a weighted average from the youngest 14 grains of  $14.4 \pm 0.3$  Ma (MSWD = 0.24) (Fig. S2).

## **B. Headwaters of Monarch Canyon, northern Funeral Mountains**

Four samples were analyzed from the Titus Canyon Formation near the head of Monarch Canyon, previously mapped by Saylor (1991) (Fig. 6-geomap). Sample ELM15MC-10 (n=116) is from red beds within the sedimentary breccia at the base of the formation (Fig. 6-geomap), and has prominent age peaks at 102 Ma, 174 Ma and 225 Ma (Fig. S3). The youngest five grains in this sample yield a YC1 $\sigma$  MDA of  $98.9 \pm 1.6$  Ma (Fig. S4), and the youngest single zircon age is  $93.6 \pm 1.0$  Ma. Eight Proterozoic grains were measured, with grain ages from 1006 Ma to 1781 Ma (Fig. S3). This sample is

bracketed in age between the Late Cretaceous and the Late Middle Eocene age of the oldest fossils in the Titus Canyon Formation (Lander, 2019).

Sample ELM15MC-16 (n=99), along strike from MC-10 at the base of the Titus Canyon Formation (Fig. 6-geomap) has Mesozoic age peaks at 86 Ma, 165 Ma and 218 Ma (Fig. S3). The youngest three grains yield a YC1 $\sigma$  of  $83.3 \pm 1.6$  Ma (MSWD = 0.03) (Fig. S4). The youngest single zircon age is  $83.1 \pm 1.4$  Ma. Paleozoic to Precambrian grains (n=34) exhibit peaks at 399 Ma, 1107 Ma, 1439 Ma and 1777 Ma, with four older grains between 1995 Ma and 2857 Ma (Fig. S3). This sample is bracketed in age between the Late Cretaceous and the Late Middle Eocene age of the oldest fossils in the Titus Canyon Formation (Lander, 2019).

ELM15MC-11 (n=112) (Fig. 6-geomap) was collected from sandstone interbedded with chert-rich pebble conglomerate. Its younger zircons exhibit age peaks at 35 Ma, 103 Ma, 164 Ma and 224 Ma (Fig. S3). A group of 13 grains yield a YC1 $\sigma$  MDA of  $35.9 \pm 0.3$  Ma (MSWD = 0.31), and the youngest single grain age is  $33.4 \pm 1.3$  Ma (Fig. S4). This sample has a relatively large proportion of Paleozoic-Precambrian grains (n=48), with age peaks at 440 Ma, 1108 Ma, 1405 Ma, 1717 Ma, 1858 Ma and 2582 Ma (Fig. S3).

The structurally highest sample from this section, ELM15MC-12 (n=107) (Fig. 5-geomap), has age peaks at 34 Ma, 90 Ma, 163 Ma and 215 Ma (Fig. S5). Paleozoic-Precambrian grains (n=17) form a peak at 1092 Ma, with additional grains between 562 Ma and 2715 Ma. The youngest 16 grains yield a YC1 $\sigma$  MDA of  $33.61 \pm 0.49$  Ma and the youngest single grain age is  $32.2 \pm 2.1$  Ma (Fig. S4). The top of the section is a normal fault that downdrops the Titus Canyon Formation against the Stirling Quartzite, across which it was once deposited (Fig. S4).

### **C. Boundary Canyon Fault (BCF) Klippe**

Five samples were analyzed from the Cenozoic sedimentary section exposed in the upper plate klippe of the BCF in the central Funeral Mountains previously mapped by Wright and Troxel (1993)(Fig. 7-geomap). This section contains a range of sedimentary lithologies with intercalated ash flow and air fall tuffs (Fig. 7-geomap) similar to those



present in the Titus Canyon Formation proper and the Panuga Formation of the type section in Titus Canyon (Reynolds, 1969; Niemi, 2002; Snow and Lux, 1999) but were not correlated in detail to this stratigraphy by Wright and Troxel (1993). The lower part of the section (map unit Ttss) (Fig. 7-geomap) has an exposed thickness of ~100m and consists of conglomerate, sandstone and tuffaceous sandstone, with minor lacustrine limestone, siltstone and tuff. The middle part of the section (Ttsc) is ~200m thick and is dominated by deep red sandstone, siltstone and conglomerate. The upper part of the section (Ttsl) has an exposed thickness of ~125m and consists of siltstone interbedded with lacustrine limestone and air fall tuff (top is erosional and/or a fault) (Fig. 7-geomap). Throughout the section there is evidence of large-scale channelization, with rapid lateral variations in thickness. Neither the bottom nor the top of the section is exposed.

These units are split into three fault or erosionally truncated sections. The northwestern part of the klippe contains a section that is the most complete, although neither its top nor bottom are exposed. It is cut by a normal fault that repeats the lower part of the section (Fig. 7-geomap). The footwall of this fault consists of the lower unit (Ttss) that is folded into a gentle syncline (Fig. 7-geomap). Both of these sections are inferred to be in normal fault contact with a section exposed to the SE (whose top and bottom are also not exposed) (Fig. 7-geomap).

The oldest sample analyzed, MR19DV-3 (n=22) is a light green-white, ~2m thick air fall tuff likely reworked in a lacustrine environment. It lies in the northeastern section of the klippe (Fig. 7-geomap). It exhibits a prominent age peak at 34 Ma, with one Mesozoic age grain and two Precambrian grains at 1922 Ma (Fig. S5). The 21 Cenozoic grains yield a YC1 $\sigma$  MDA of  $34.1 \pm 0.5$  Ma (MSWD = 0.38) (Fig. S6), which is considered the age of the tuff.

The next oldest sample, MR19DV-8 (n=152) is a dark red-brown coarse-grained sandstone from the structurally lowest exposure of the northwestern section of the klippe (Fig. 7-geomap). It has Cenozoic-Mesozoic age peaks at 26 Ma, 170 Ma and 223 Ma (Fig. S5). Six Paleozoic grains are clustered at 419 Ma. A group of 3 grains yield a YC1 $\sigma$  MDA of  $23.0 \pm 0.2$  Ma (MSWD = 0.57) and the youngest single grain age is  $20.79 \pm 0.1$  Ma (Fig. S6).

Sample MR19DV-4 (n=119) is a ~3m thick light red-brown calcite-cemented coarse-grained sandstone interval overlying the tuff of MR19DV-3 described above (Fig. 7-geomap). It has a prominent youngest peak at 25 Ma, with few Mesozoic grains at 167 Ma and 221 Ma, and only one Precambrian grain (Fig. S5). Three grains yield a  $YC1\sigma$  MDA of  $22.2 \pm 0.2$  Ma (MSWD = 0.41), and the youngest single grain age is  $21.6 \pm 0.1$  Ma (Fig. S6). The juxtaposition of this sample and the 34 Ma tuff of MR19DV-3 is interpreted to result from channelization that led to an unconformity between these two units (Fig. 7-geomap).

MR19DV-5 (n=23) was sampled from a ~4m thick light pink-brown ash flow tuff at the base of unit Ttss (Fig. S7). It has one peak at 24 Ma (Fig. S5). All 23 grains intersect within error for a maximum depositional age of  $23.5 \pm 1.1$  Ma (MSWD = 0.22) (Fig. S6), and this is considered the age of this tuff. The youngest single grain age is  $20.1 \pm 3.6$  Ma (Fig. S6).

MR19DV-6 (n=126) is a light red-brown coarse-grained sandstone. It lies in the southeastern of the three structural sections in the klippe, and is the structurally and stratigraphically highest sample analyzed from this area (Fig. 7-geomap). It has Cenozoic-Mesozoic peaks at 15 and 173 Ma (Fig. S6). Precambrian peaks lie at 1084 Ma and 1748 Ma. Two grains yield a  $YC1\sigma$  MDA of  $12.7 \pm 0.8$  Ma (MSWD = 1.3) (Fig. S6), and the youngest single grain age is  $10.8 \pm 0.1$  Ma.

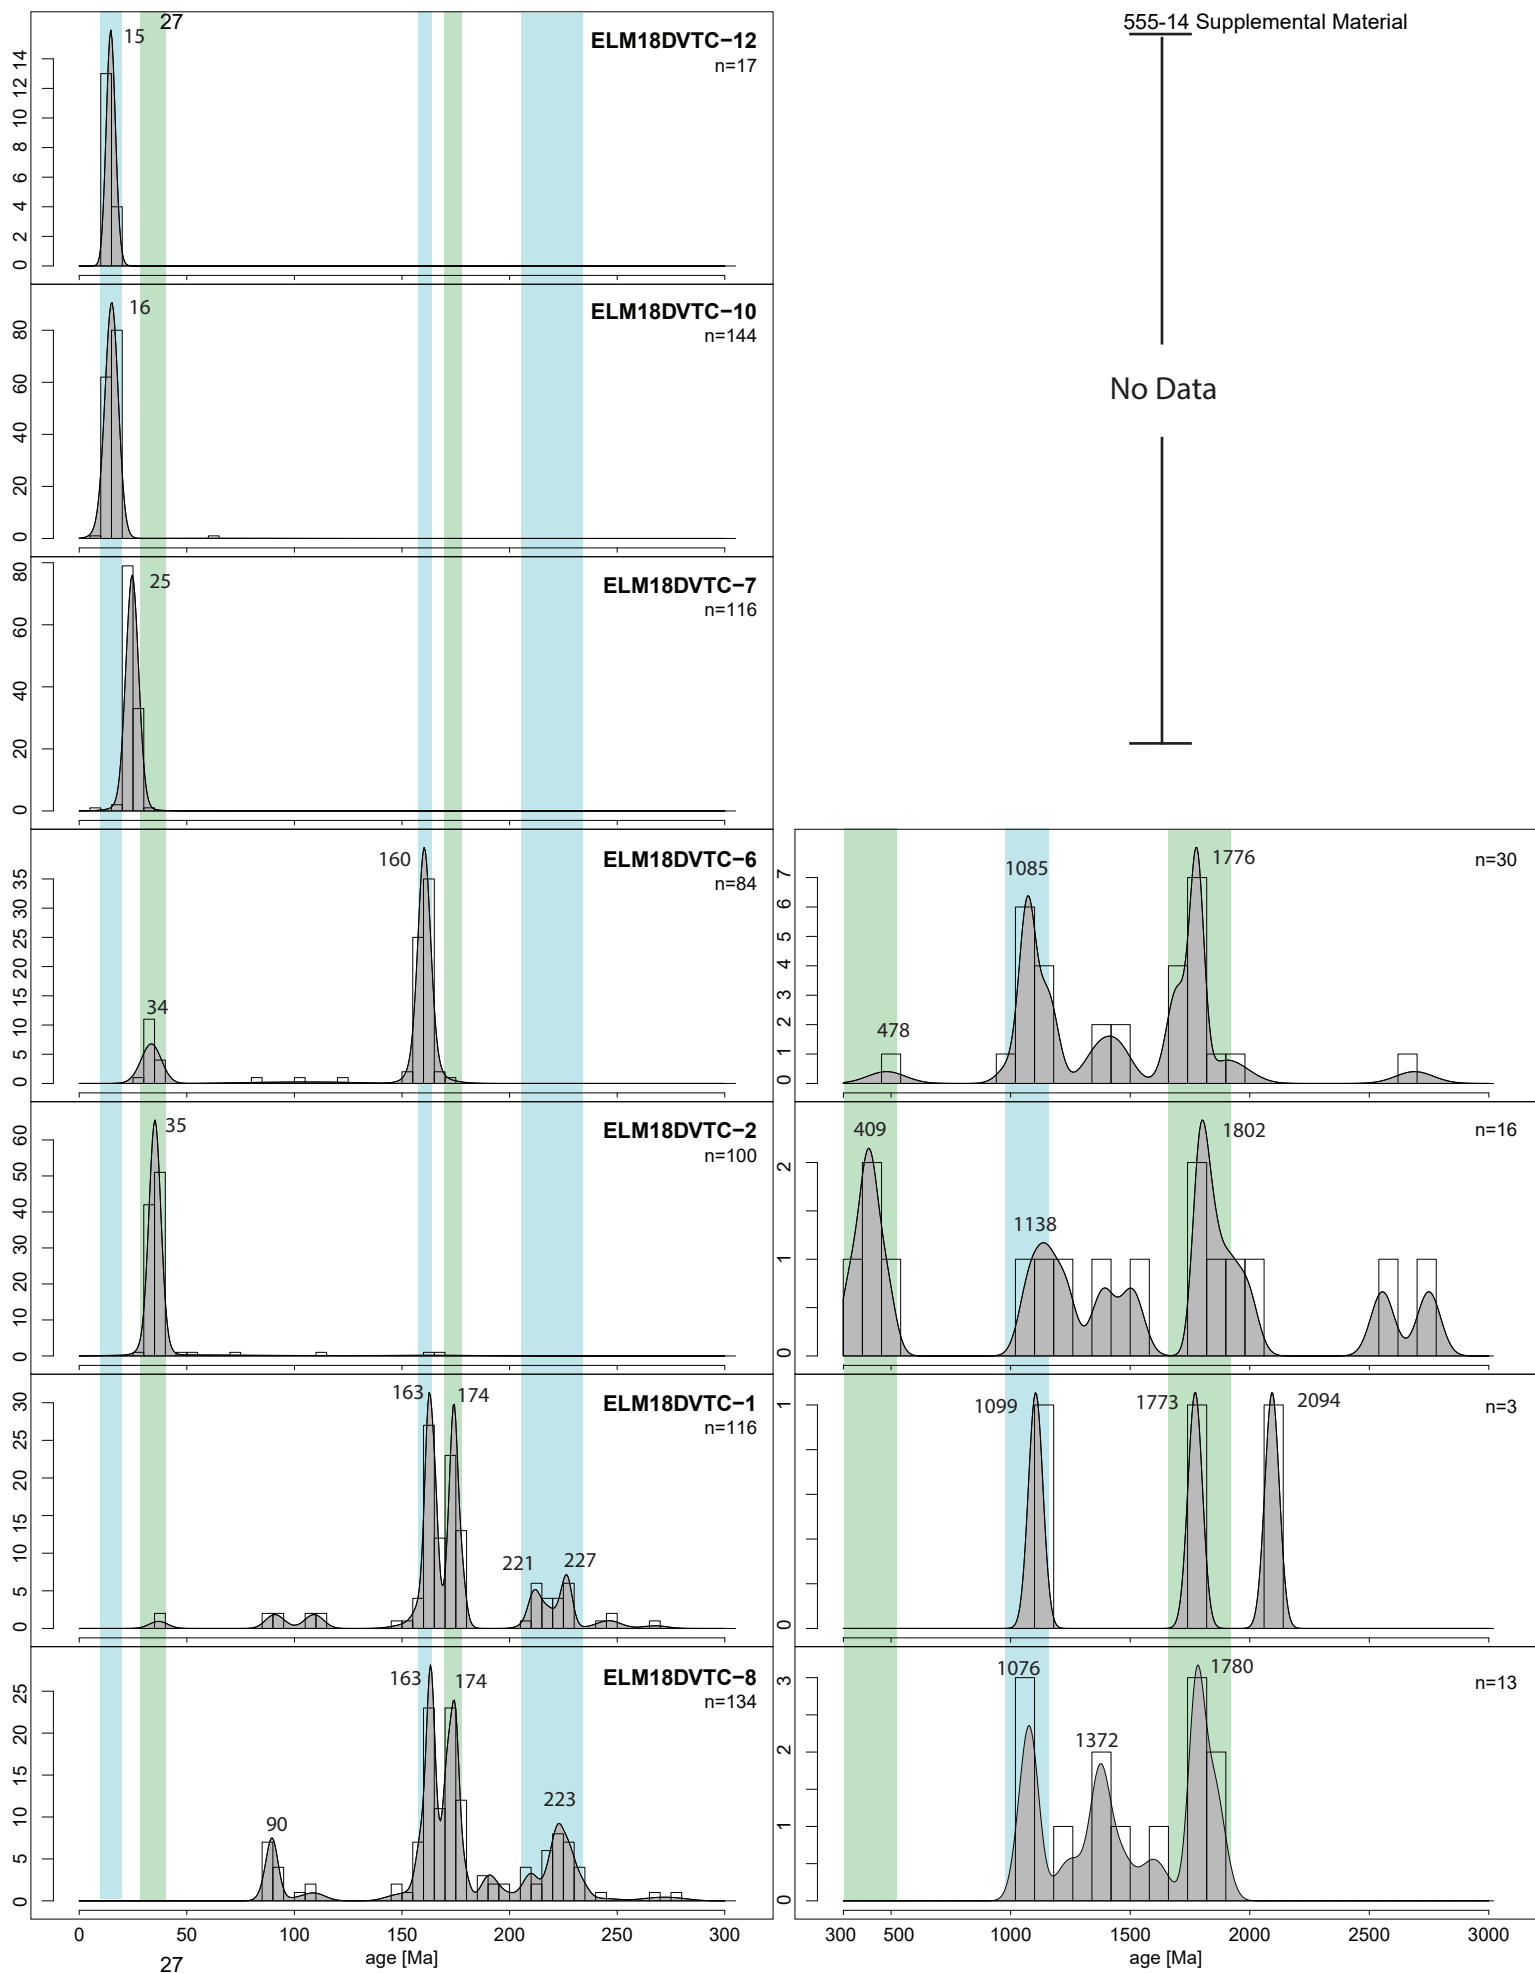

Figure S1

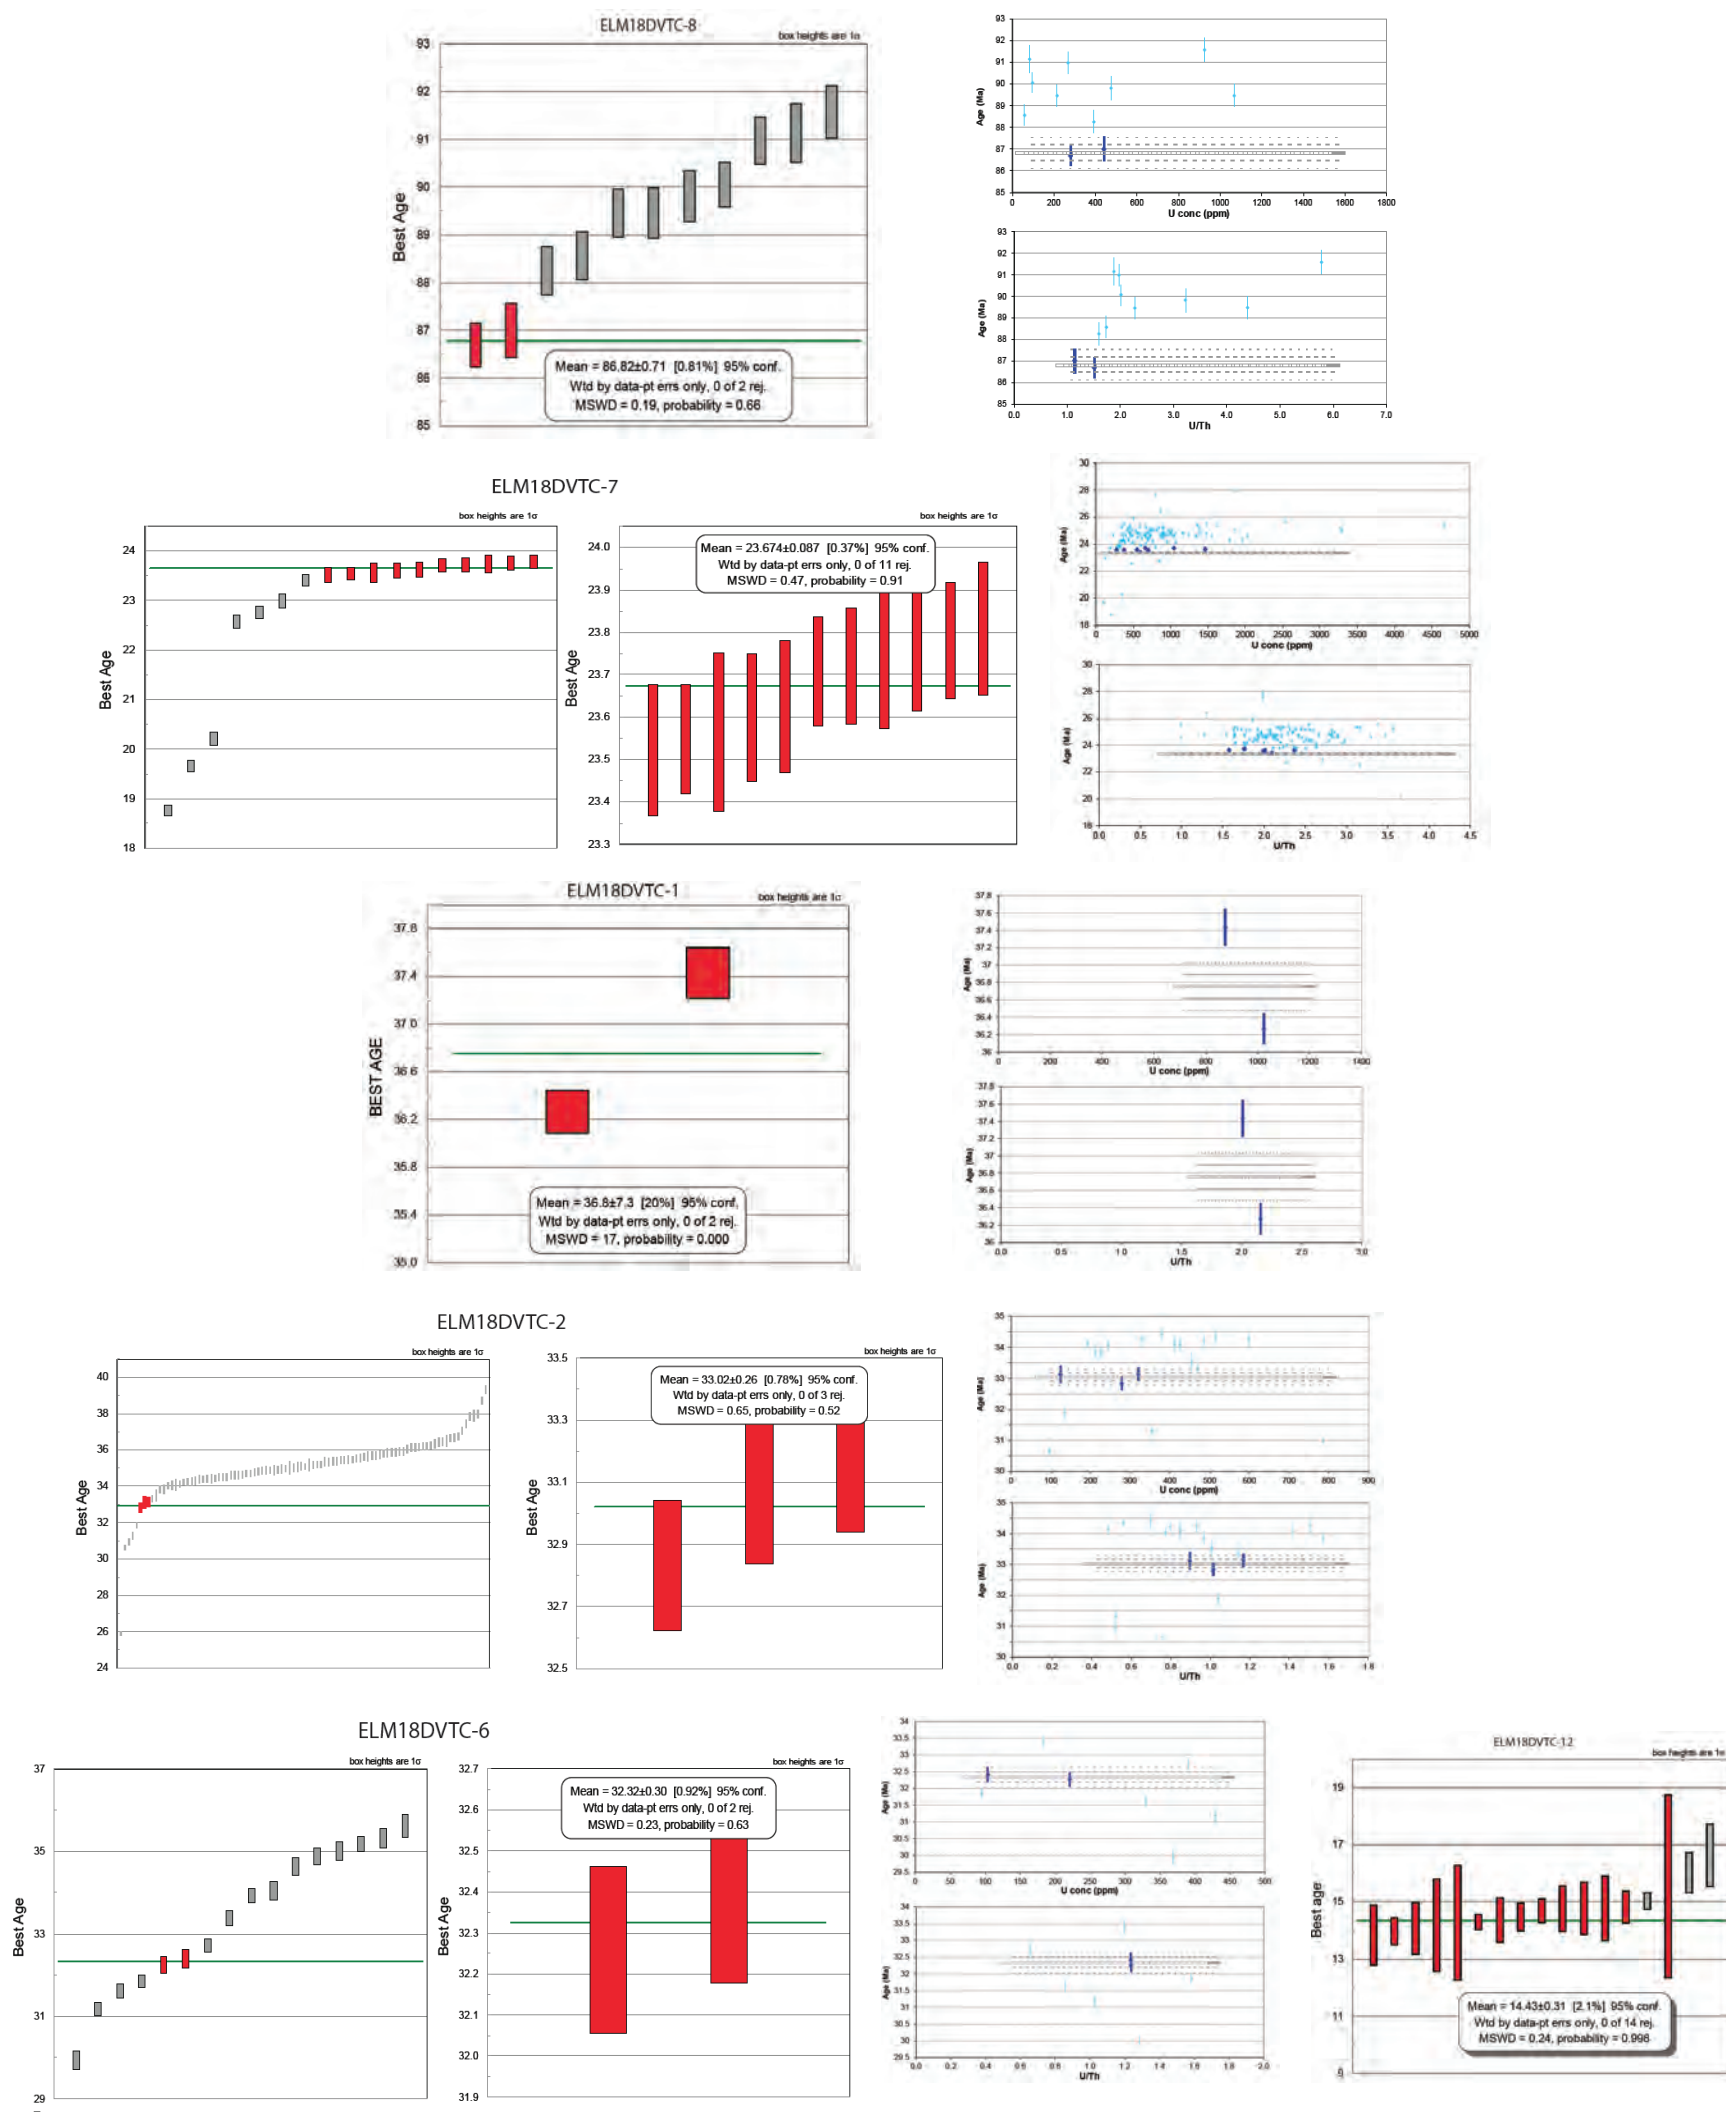

Figure S2

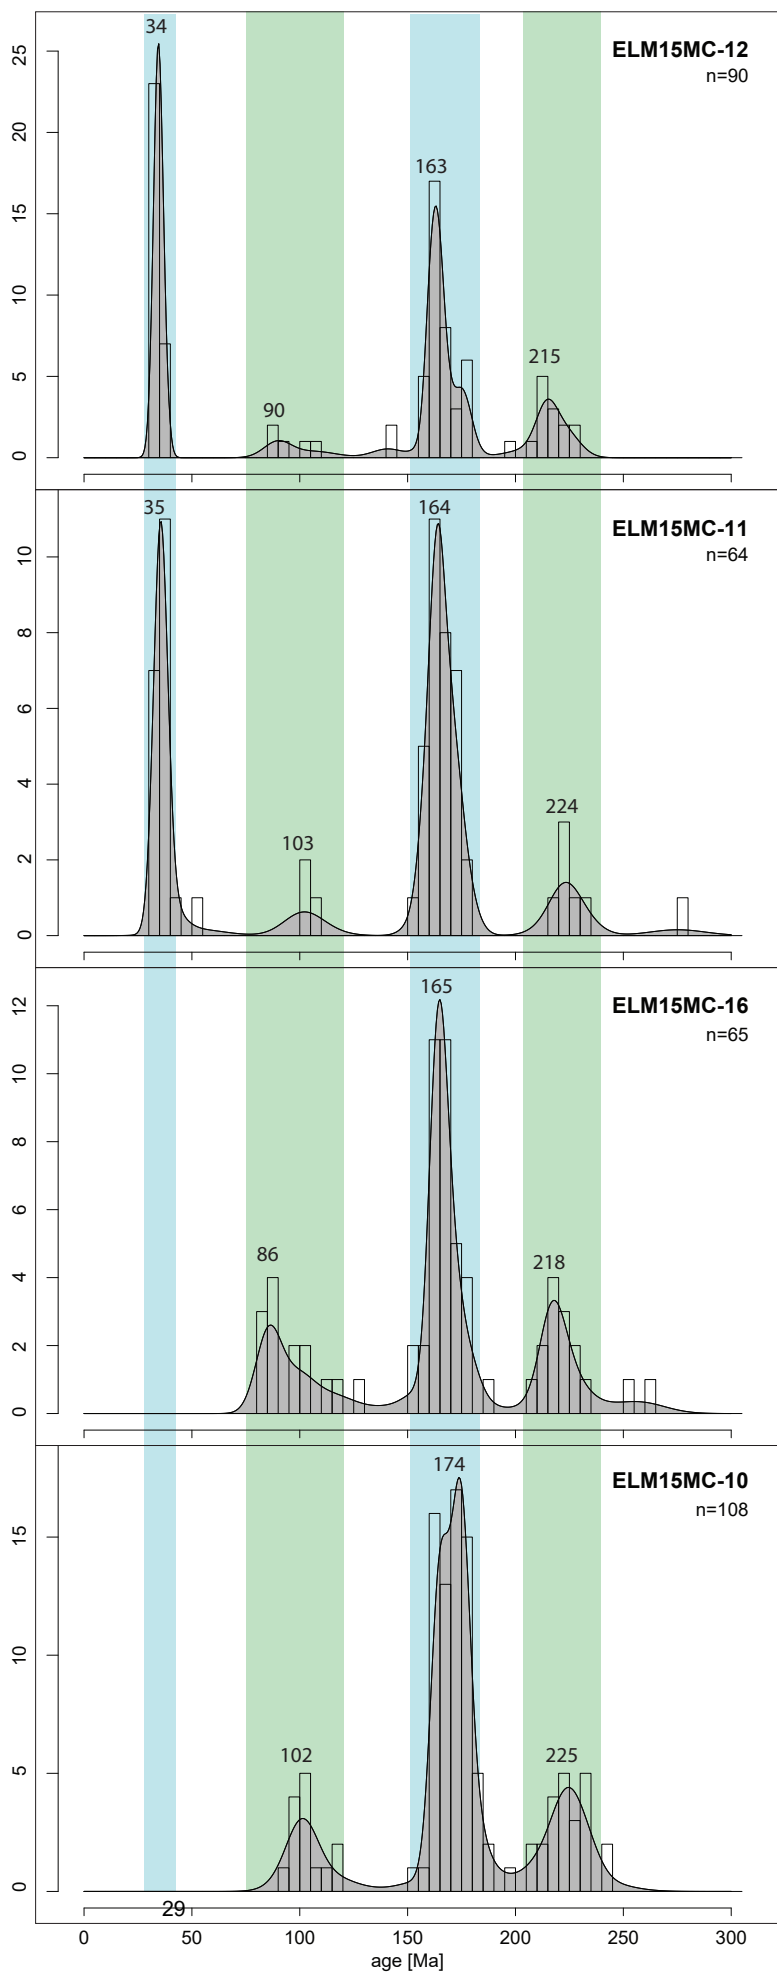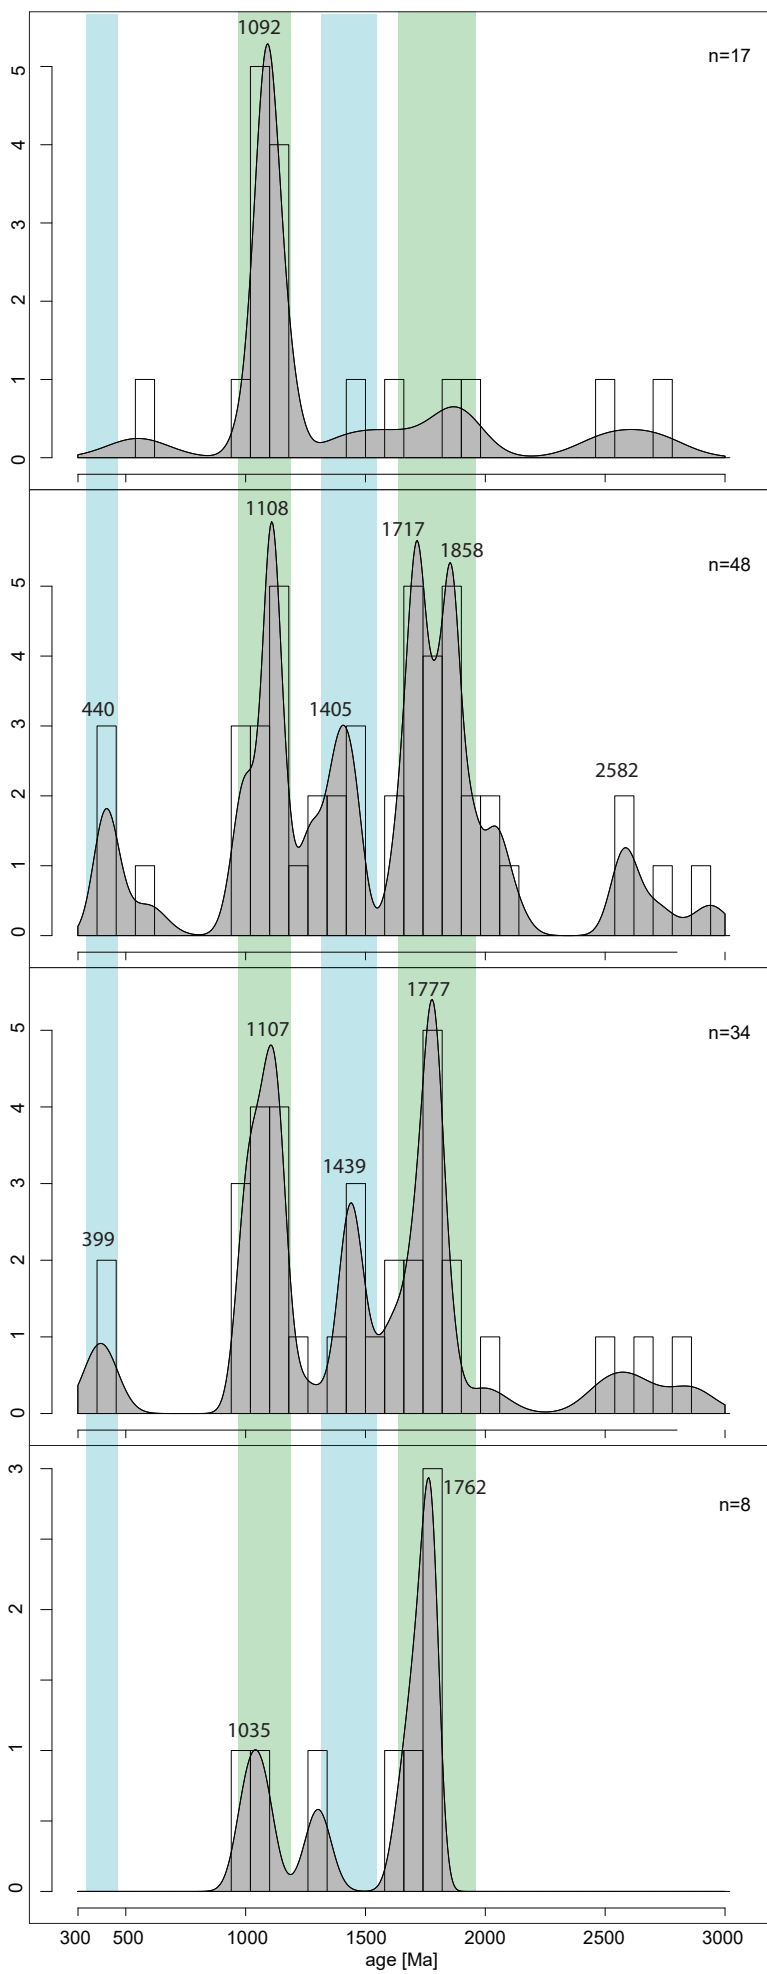

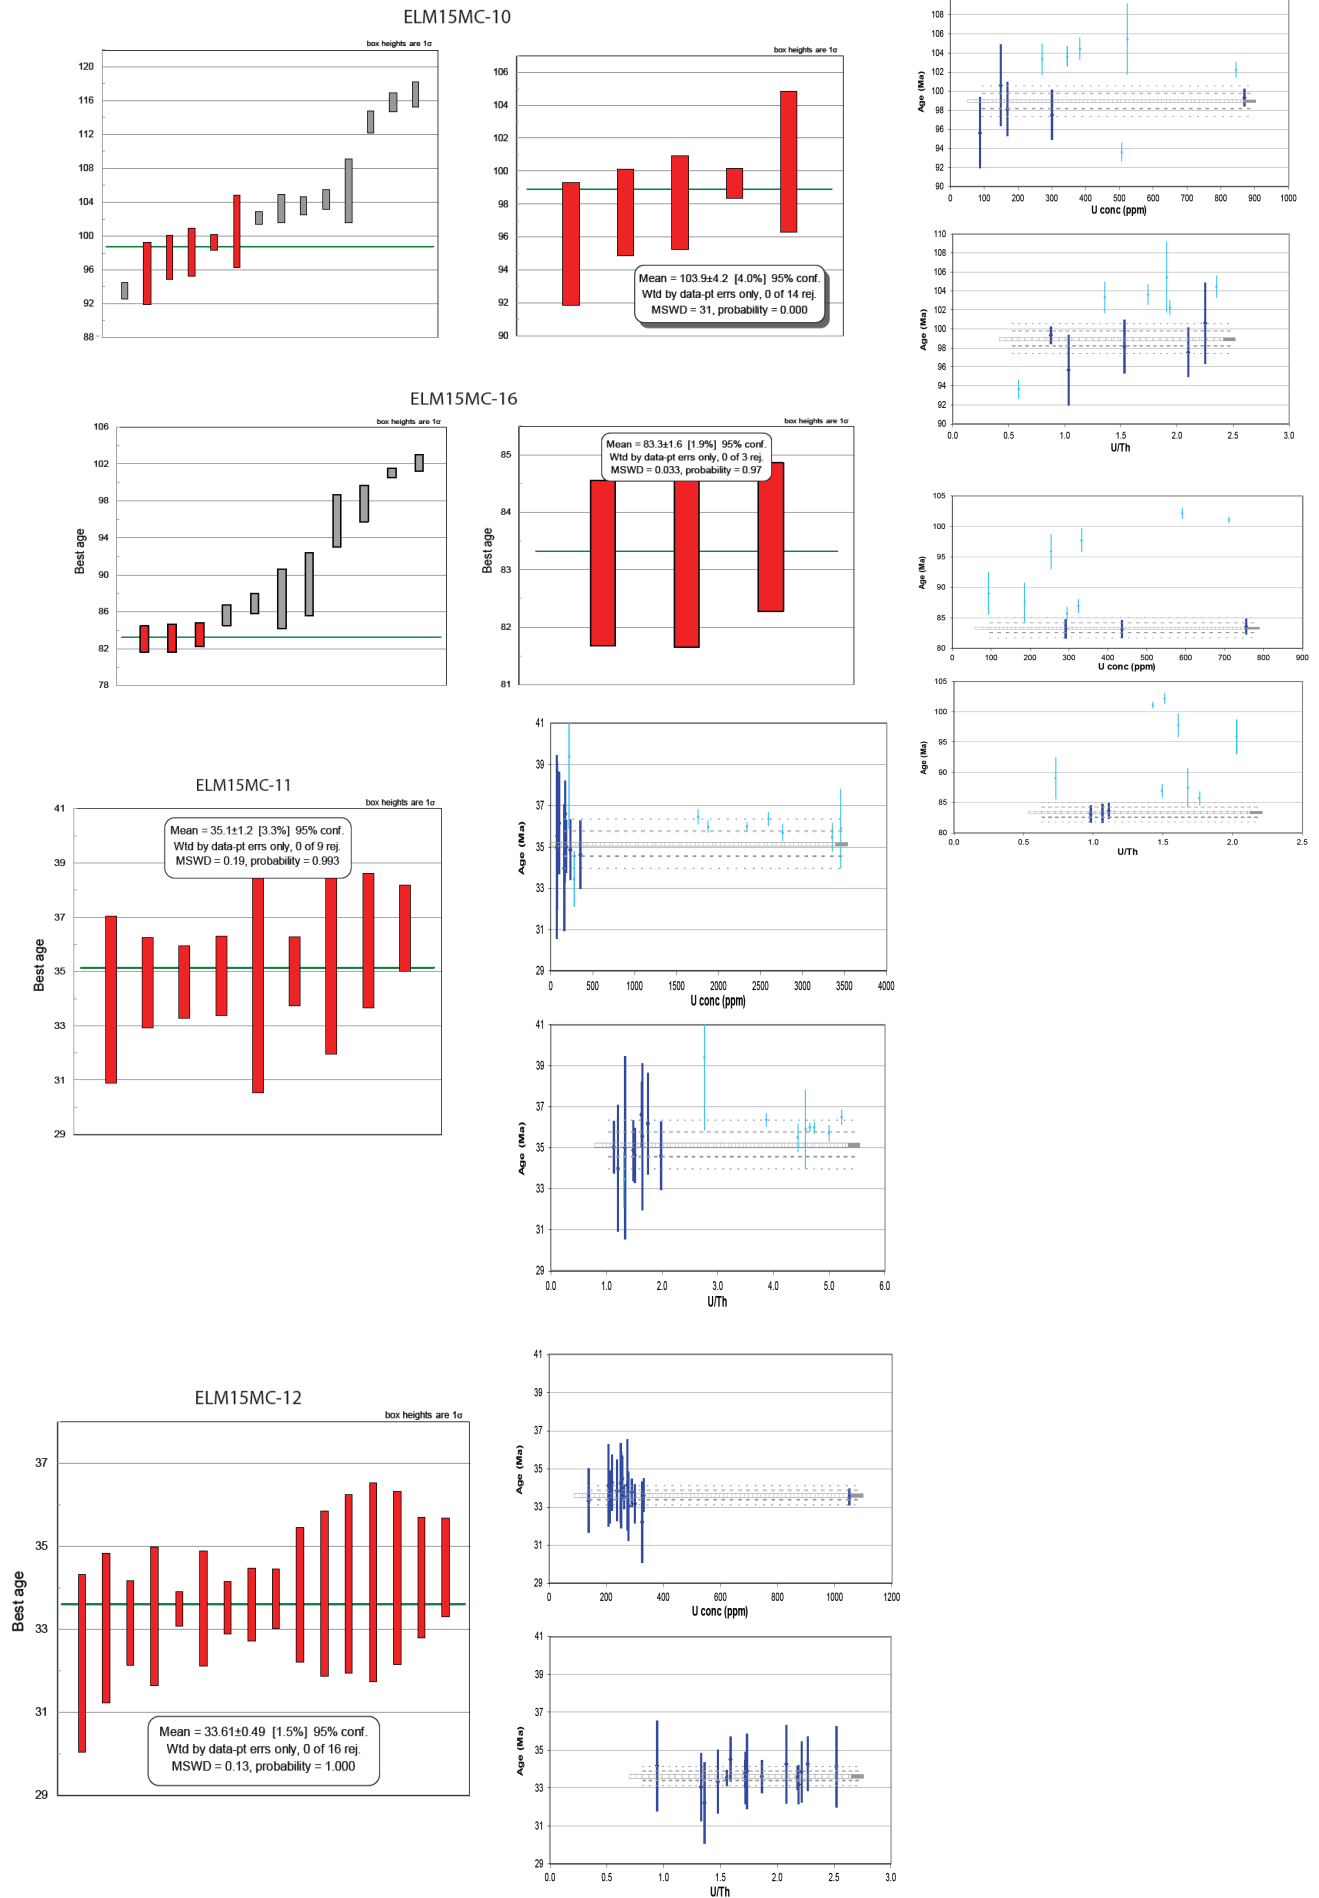

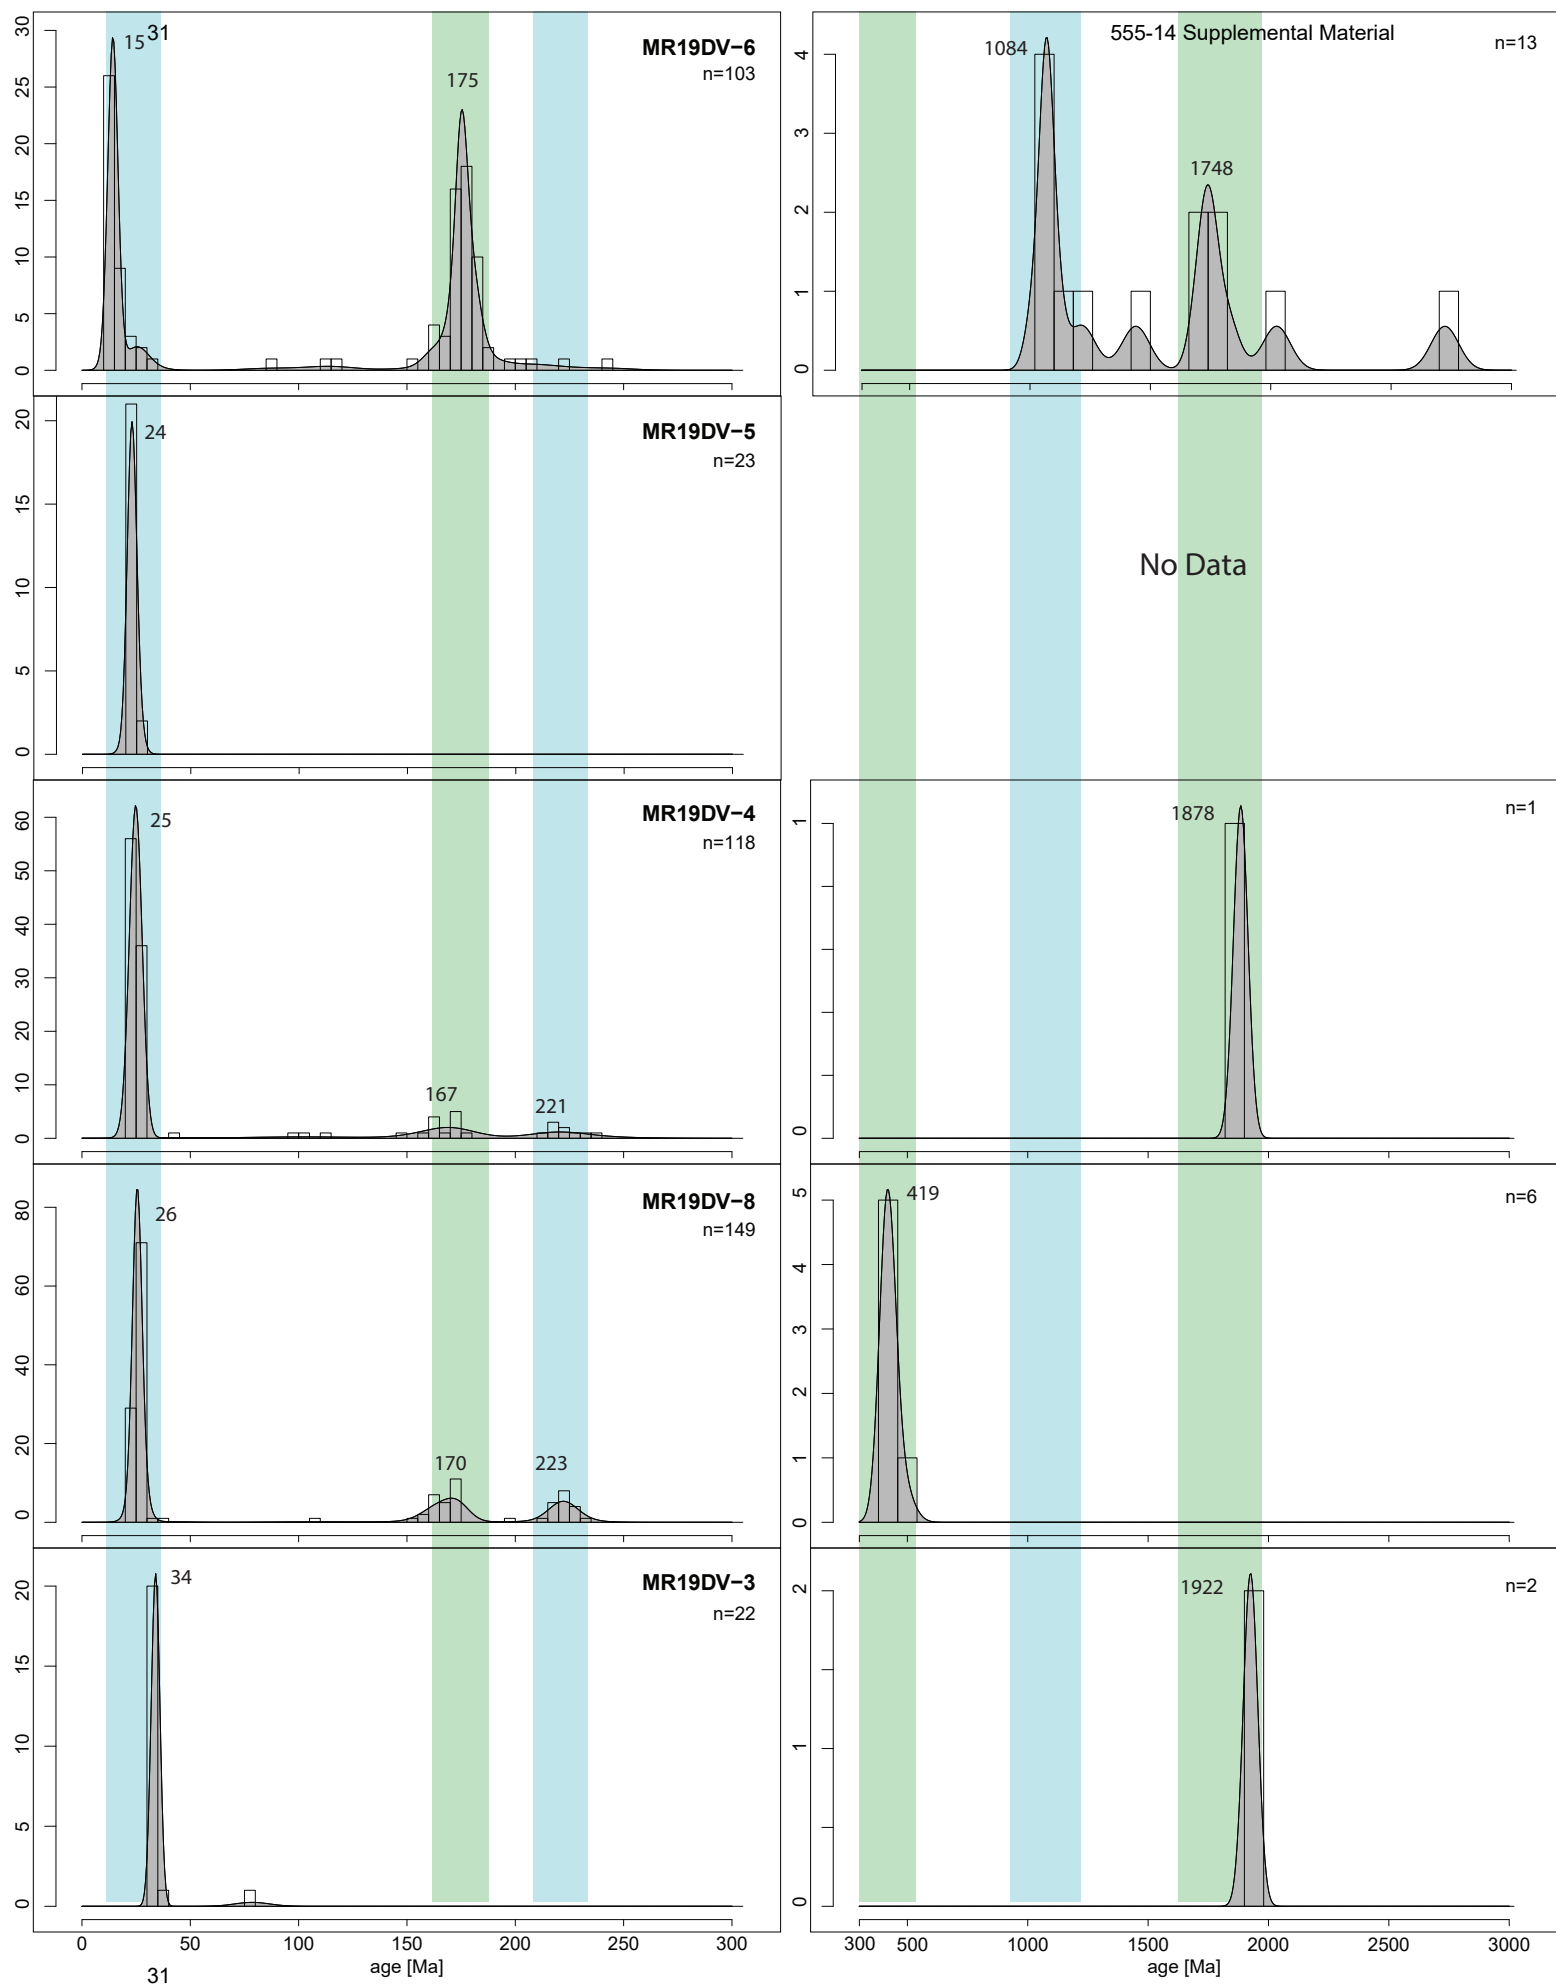

Figure S5

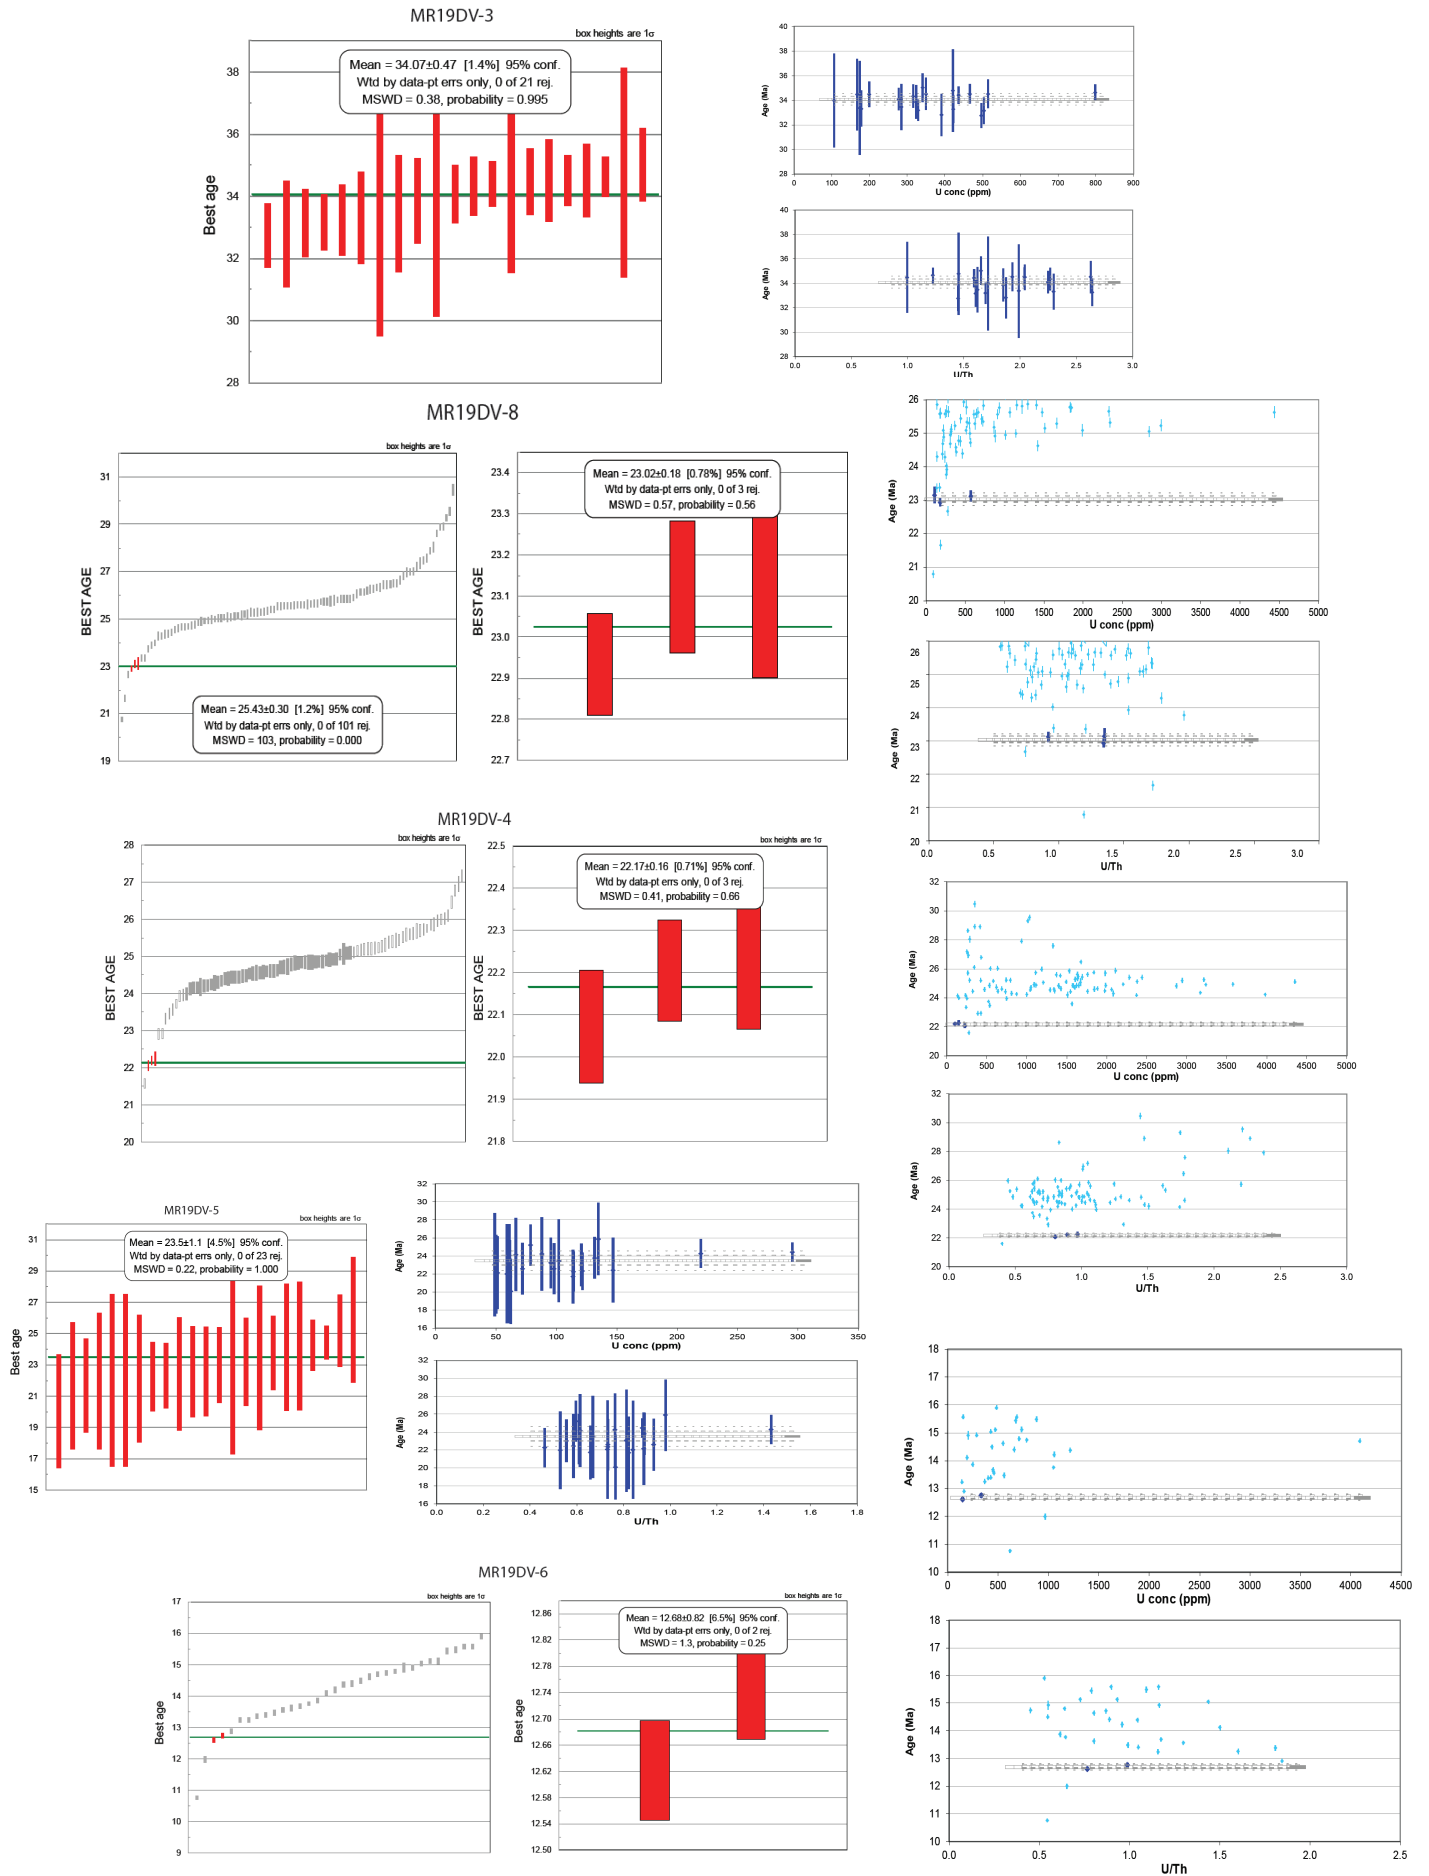

Figure S6
