# Supplementary material
Source: publisher figshare collection journal article supplement (https://gsapubs.figshare.com/articles/dataset/_/16850284)
Supplement: Supplementary file 1 [file 1]

## Sheet: Table S1
Table S1. Detrital Zircon U-Pb data
						Isotope ratios						Apparent ages (Ma)
Sample/Analysis	U	206Pb	U/Th	206Pb*	±	207Pb*	±	206Pb*	±	error	206Pb*	±	207Pb*	±	207Pb*	±	Best age	±	Conc
	(ppm)	204Pb		207Pb*	(%)	235U	(%)	238U	(%)	corr.	238U	(Ma)	235U	(Ma)	206Pb*	(Ma)	(Ma)	(Ma)	(%)
ELM15MC-10
Spot 114	506.738	25113.5	0.589618	20.6239	5.38157	0.0978026	5.48109	0.0146292	1.03977	0.189701	93.6226	0.966423	94.746	4.95823	123.097	126.833	93.6226	0.966423	NA
Spot 56	87.3797	9488.82	1.03315	21.1666	23.8764	0.0973607	24.1951	0.0149463	3.91415	0.161774	95.6369	3.71574	94.3371	21.8001	61.6022	575.921	95.6369	3.71574	NA
Spot 39	300.925	13803.5	2.10136	20.0961	7.56169	0.104595	8.02938	0.0152447	2.70035	0.336308	97.5322	2.61388	101.009	7.72016	183.818	176.328	97.5322	2.61388	NA
Spot 62	169.218	10917.1	1.53163	20.867	15.9503	0.101352	16.212	0.0153387	2.90089	0.178936	98.129	2.82506	98.0233	15.1496	95.4511	379.687	98.129	2.82506	NA
Spot 6	869.045	97391	0.874624	21.3437	3.14352	0.100294	3.27985	0.0155255	0.935801	0.285318	99.3147	0.922265	97.048	3.03566	41.6844	75.1721	99.3147	0.922265	NA
Spot 97	148.675	9689.75	2.253	20.0668	24.0123	0.108082	24.3909	0.0157301	4.2811	0.17552	100.614	4.27393	104.21	24.1614	187.209	566.043	100.614	4.27393	NA
Spot 36	844.399	21146.7	1.93845	20.8507	3.97595	0.10571	4.04925	0.0159858	0.766962	0.189408	102.236	0.777929	102.033	3.93081	97.2752	94.13	102.236	0.777929	NA
Spot 38	271.046	24572.4	1.35704	21.9509	12.2868	0.10151	12.3917	0.0161607	1.60881	0.12983	103.346	1.64939	98.1694	11.5958	-25.7871	298.57	103.346	1.64939	NA
Spot 118	345.199	41274.6	1.74345	20.4419	4.43469	0.109305	4.55207	0.0162055	1.0271	0.225633	103.63	1.05587	105.33	4.55441	143.954	104.09	103.63	1.05587	NA
Spot 60	382.769	33308.3	2.35411	21.5475	8.13928	0.104507	8.21332	0.0163321	1.10033	0.133969	104.433	1.13985	100.928	7.89106	18.951	195.749	104.433	1.13985	NA
Spot 117	523.378	25699.6	1.90835	20.9572	5.48651	0.108474	6.53367	0.0164876	3.54783	0.543007	105.419	3.70968	104.569	6.49223	85.2493	130.215	105.419	3.70968	NA
Spot 34	681.711	98002.9	1.37164	20.926	2.31969	0.117065	2.58126	0.0177668	1.13221	0.438629	113.527	1.27412	112.407	2.74669	88.7835	54.9879	113.527	1.27412	NA
Spot 46	618.63	22455.4	3.85349	20.6783	3.93072	0.120938	4.05334	0.0181375	0.989439	0.244105	115.874	1.13626	115.922	4.44046	116.907	92.7153	115.874	1.13626	NA
Spot 101	610.446	81857.3	1.40917	20.9008	2.39658	0.120584	2.71349	0.0182789	1.27256	0.468976	116.769	1.47259	115.601	2.96486	91.6366	56.787	116.769	1.47259	NA
Spot 35	114.457	10124.1	1.00512	19.9922	14.062	0.162433	14.6389	0.0235523	4.06888	0.277951	150.068	6.03555	152.831	20.7732	195.922	328.189	150.068	6.03555	NA
Spot 67	246.466	2289.67	0.845441	16.6809	23.8572	0.201316	24.0691	0.0243554	3.18675	0.1324	155.124	4.8844	186.239	40.9776	601.712	523.233	155.124	4.8844	NA
Spot 12	255.191	21973.2	1.09037	20.6989	6.95386	0.168929	7.08265	0.0253602	1.3445	0.18983	161.444	2.14366	158.489	10.3934	114.535	164.217	161.444	2.14366	NA
Spot 7	259.255	43125.2	1.30736	21.9313	6.42025	0.159629	6.48229	0.0253907	0.894711	0.138024	161.635	1.42819	150.378	9.06071	-23.6252	155.588	161.635	1.42819	NA
Spot 26	289.206	26388.4	0.864641	20.8272	5.57189	0.168358	5.70371	0.025431	1.21917	0.21375	161.889	1.94912	157.993	8.34556	99.9903	131.89	161.889	1.94912	NA
Spot 53	106.17	16158.9	0.889178	22.2842	24.0543	0.157578	24.2126	0.0254678	2.764	0.114156	162.12	4.42513	148.581	33.4791	-62.4176	594.039	162.12	4.42513	NA
Spot 11	162.02	21023.8	1.39002	20.1989	15.2381	0.17443	15.5181	0.0255533	2.93452	0.189103	162.657	4.7135	163.256	23.4066	171.923	357.455	162.657	4.7135	NA
Spot 52	68.8427	11685.7	1.14665	21.1724	27.386	0.166578	27.5804	0.0255791	3.26953	0.118545	162.82	5.25678	156.445	40.0092	60.9565	663.321	162.82	5.25678	NA
Spot 25	380.996	31064.5	0.896088	19.9008	3.68057	0.177881	3.74804	0.0256743	0.707944	0.188884	163.418	1.14237	166.236	5.74735	206.567	85.3987	163.418	1.14237	NA
Spot 49	337.238	14926.9	0.687598	19.6362	5.65883	0.180306	5.87025	0.0256783	1.56122	0.265955	163.444	2.51964	168.324	9.1057	237.517	130.599	163.444	2.51964	NA
Spot 102	275.374	21103.4	0.972856	20.1135	9.16282	0.17616	9.212	0.0256976	0.950691	0.103201	163.564	1.53543	164.751	14.0104	181.806	213.855	163.564	1.53543	NA
Spot 100	303.337	57709.8	1.37567	20.1317	4.43379	0.176007	4.61493	0.0256986	1.28028	0.27742	163.571	2.06781	164.619	7.01331	179.699	103.401	163.571	2.06781	NA
Spot 108	127.269	26280.4	1.21175	19.5663	16.5628	0.181199	16.7885	0.0257137	2.74361	0.163423	163.666	4.43384	169.092	26.1559	245.728	383.736	163.666	4.43384	NA
Spot 20	289.232	3617.16	1.3245	19.1963	6.32441	0.184927	6.50241	0.0257464	1.51102	0.232378	163.871	2.44491	172.291	10.3045	289.498	144.619	163.871	2.44491	NA
Spot 16	274.085	31611.1	0.967611	19.0287	3.44881	0.186613	3.68388	0.0257543	1.29486	0.351493	163.921	2.09579	173.735	5.88266	309.507	78.5422	163.921	2.09579	NA
Spot 105	264.652	42838.5	0.762148	19.2497	7.84819	0.184805	8.75394	0.025801	3.8778	0.442977	164.214	6.28748	172.187	13.8652	283.182	179.769	164.214	6.28748	NA
Spot 71	117.254	15311.7	1.2088	23.3728	20.8436	0.152639	20.898	0.0258747	1.50692	0.0721081	164.678	2.45013	144.24	28.1073	-180.098	524.935	164.678	2.45013	NA
Spot 79	232.574	9833.84	1.16249	20.1892	7.67786	0.176921	7.8082	0.0259058	1.42072	0.181953	164.873	2.31269	165.407	11.9188	173.037	179.386	164.873	2.31269	NA
Spot 32	727.753	100723	0.489103	19.9375	3.32114	0.179896	3.50588	0.026013	1.12303	0.320327	165.547	1.83547	167.971	5.42761	202.245	77.1342	165.547	1.83547	NA
Spot 29	645.151	111889	0.934795	19.9635	2.58189	0.179742	2.97664	0.0260247	1.48128	0.497636	165.62	2.42205	167.838	4.60491	199.255	59.9632	165.62	2.42205	NA
Spot 65	459.211	35760	0.5615	20.1709	3.11221	0.177953	3.21558	0.0260334	0.808758	0.251512	165.675	1.32284	166.298	4.93254	175.152	72.6254	165.675	1.32284	NA
Spot 58	118.403	959.782	1.28776	14.7834	26.8218	0.242978	28.6141	0.026052	9.96784	0.348354	165.791	16.3152	220.856	56.8549	857.629	566.595	165.791	16.3152	NA
Spot 95	203.578	16517.4	1.48812	19.9661	12.064	0.180892	12.3587	0.0261947	2.6828	0.217077	166.688	4.41458	168.828	19.225	198.915	281.081	166.688	4.41458	NA
Spot 81	225.243	26869	1.34044	21.3872	3.90647	0.169082	4.19301	0.0262271	1.52342	0.363325	166.892	2.50984	158.622	6.15763	36.8062	93.532	166.892	2.50984	NA
Spot 99	374.935	26199.5	1.48463	19.9976	4.30941	0.18086	4.43254	0.0262312	1.03749	0.234063	166.917	1.70953	168.8	6.89339	195.297	100.186	166.917	1.70953	NA
Spot 107	361.788	124746	1.14436	20.9378	2.53875	0.174065	2.78015	0.0264327	1.13314	0.40758	168.183	1.8811	162.941	4.18525	87.4466	60.1852	168.183	1.8811	NA
Spot 112	296.354	38645	0.967945	21.2766	3.13386	0.171395	5.03468	0.0264485	3.94042	0.782655	168.282	6.54522	160.629	7.48006	49.2005	74.8322	168.282	6.54522	NA
Spot 119	344.31	64077.5	1.2524	20.6368	2.08579	0.17713	2.39985	0.0265115	1.1869	0.494574	168.678	1.97608	165.588	3.66677	121.641	49.1239	168.678	1.97608	NA
Spot 87	271.03	25098.1	1.29696	20.3964	5.9144	0.179355	6.34163	0.0265318	2.28826	0.360831	168.805	3.81256	167.506	9.79296	149.2	138.732	168.805	3.81256	NA
Spot 9	796.598	61230.3	0.517778	20.0979	2.61203	0.182056	2.73265	0.0265371	0.802906	0.29382	168.839	1.33802	169.828	4.27349	183.609	60.859	168.839	1.33802	NA
Spot 75	362.958	9104.1	1.48925	19.3406	6.04977	0.190068	6.608	0.0266611	2.65819	0.402268	169.617	4.44995	176.687	10.7165	272.35	138.752	169.617	4.44995	NA
Spot 33	697.542	73540.3	1.31371	20.0634	2.45131	0.184245	4.19593	0.0268102	3.40542	0.811601	170.554	5.7319	171.707	6.62856	187.607	57.0844	170.554	5.7319	NA
Spot 4	168.211	15572.4	2.49048	19.9652	7.62431	0.186029	7.74987	0.0269372	1.38937	0.179277	171.351	2.34934	173.235	12.3433	199.042	177.304	171.351	2.34934	NA
Spot 93	261.734	25612.7	1.18304	20.1118	7.15756	0.184779	7.27149	0.0269528	1.28214	0.176325	171.448	2.16924	172.165	11.5156	181.996	166.929	171.448	2.16924	NA
Spot 116	93.4824	12351.8	1.26058	21.8443	17.1711	0.170243	17.2743	0.0269716	1.88464	0.109101	171.566	3.19076	159.63	25.522	-14.009	417.582	171.566	3.19076	NA
Spot 48	153.139	20623.6	0.642917	21.1719	11.3037	0.176118	11.6668	0.0270435	2.88823	0.247559	172.018	4.90258	164.715	17.7411	60.9833	270.076	172.018	4.90258	NA
Spot 24	139.998	27395.7	0.794212	20.3532	11.0761	0.183273	11.2854	0.0270538	2.16322	0.191683	172.083	3.67328	170.873	17.7502	154.127	260.05	172.083	3.67328	NA
Spot 76	375.756	62667.9	1.09052	19.8718	4.02615	0.187777	4.58394	0.0270632	2.19149	0.478079	172.142	3.72254	174.731	7.35842	209.898	93.3517	172.142	3.72254	NA
Spot 13	124.286	21522.7	1.38624	22.5478	11.7658	0.165851	11.9424	0.0271218	2.04636	0.171353	172.51	3.48336	155.811	17.2519	-91.1827	289.426	172.51	3.48336	NA
Spot 57	192.983	39777	1.37835	19.389	4.55704	0.193408	4.74056	0.0271975	1.30627	0.275553	172.985	2.2296	179.533	7.80106	266.661	104.602	172.985	2.2296	NA
Spot 72	242.578	45218.6	0.652136	20.0682	5.18045	0.186869	5.62989	0.0271985	2.20422	0.391522	172.991	3.7624	173.955	9.00071	187.052	120.642	172.991	3.7624	NA
Spot 19	165.601	13303	1.41669	19.9446	10.9275	0.188232	11.0223	0.027228	1.44267	0.130886	173.176	2.4651	175.119	17.7312	201.445	254.35	173.176	2.4651	NA
Spot 27	236.959	27756.8	1.2339	21.2302	7.28781	0.177648	7.3404	0.0273535	0.877095	0.119489	173.963	1.50542	166.035	11.2438	54.4155	174.042	173.963	1.50542	NA
Spot 54	222.795	38112.3	0.70378	20.8075	6.35363	0.18134	6.4927	0.027366	1.33665	0.205869	174.042	2.2952	169.213	10.1202	102.205	150.346	174.042	2.2952	NA
Spot 104	483.261	44299.5	0.614326	19.3774	4.73164	0.195131	4.91946	0.0274234	1.34637	0.273683	174.402	2.31663	180.998	8.15583	267.988	108.568	174.402	2.31663	NA
Spot 80	153.097	57048	1.65791	20.9166	11.5598	0.181153	11.638	0.0274812	1.34735	0.115772	174.765	2.32307	169.053	18.1257	89.8466	274.723	174.765	2.32307	NA
Spot 43	243.532	34088.4	1.17363	20.3363	6.63516	0.186541	6.80667	0.0275135	1.51838	0.223073	174.967	2.62094	173.673	10.8661	156.084	155.49	174.967	2.62094	NA
Spot 78	204.566	19670.1	1.10514	20.2064	5.99147	0.1878	6.21212	0.0275221	1.64095	0.264153	175.021	2.83338	174.75	9.97322	171.056	139.979	175.021	2.83338	NA
Spot 31	91.7668	10119.4	1.94319	22.2952	10.904	0.170465	11.471	0.0275642	3.56176	0.310502	175.285	6.15913	159.823	16.9648	-63.6234	266.688	175.285	6.15913	NA
Spot 55	242.612	36625.1	0.914858	20.833	6.24078	0.182515	6.37962	0.0275771	1.32372	0.207493	175.366	2.29008	170.222	9.99838	99.3164	147.746	175.366	2.29008	NA
Spot 109	252.187	48310.3	1.0738	20.1093	5.69928	0.189444	5.89583	0.0276298	1.50966	0.256055	175.697	2.61661	176.155	9.5351	182.283	132.85	175.697	2.61661	NA
Spot 2	142.859	16696.4	1.07641	21.5053	7.97648	0.1772	8.15943	0.0276381	1.71816	0.210573	175.749	2.97886	165.649	12.4717	23.6484	191.647	175.749	2.97886	NA
Spot 68	113.854	14620.7	1.10736	21.6482	14.8696	0.176637	14.9592	0.0277334	1.63484	0.109287	176.347	2.84391	165.163	22.8061	7.72153	359.552	176.347	2.84391	NA
Spot 40	131.338	21417.9	0.954777	19.8427	10.3071	0.193087	10.8574	0.0277876	3.41257	0.31431	176.687	5.94769	179.26	17.8435	213.342	239.313	176.687	5.94769	NA
Spot 110	150.882	16151.1	0.956823	20.8776	13.6993	0.183545	13.9062	0.027792	2.38994	0.171862	176.714	4.16601	171.106	21.9009	94.254	325.684	176.714	4.16601	NA
Spot 17	206.134	34744.3	1.18602	21.0168	6.7443	0.182813	6.80096	0.0278658	0.876066	0.128815	177.177	1.53105	170.478	10.6735	78.4601	160.322	177.177	1.53105	NA
Spot 88	140.471	33705	0.988698	20.9454	10.6437	0.183496	10.9494	0.027875	2.56906	0.23463	177.235	4.49125	171.065	17.2394	86.5846	253.01	177.235	4.49125	NA
Spot 85	141.881	5614.22	1.43031	19.2312	8.27617	0.199929	8.62593	0.0278857	2.43139	0.281869	177.302	4.25216	185.066	14.5944	285.335	189.509	177.302	4.25216	NA
Spot 44	274.387	33802	1.29692	19.7221	5.37952	0.195182	5.64659	0.0279184	1.71604	0.303908	177.507	3.00454	181.041	9.3634	227.448	124.39	177.507	3.00454	NA
Spot 113	101.239	36638.9	1.07879	19.7069	10.9116	0.19576	12.1954	0.0279795	5.44656	0.446608	177.89	9.55646	181.532	20.2751	229.181	252.686	177.89	9.55646	NA
Spot 5	188.603	11600.6	1.26242	19.2951	6.27441	0.199972	6.52054	0.0279843	1.77459	0.272154	177.921	3.11419	185.102	11.0339	277.785	143.792	177.921	3.11419	NA
Spot 77	330.708	60115	1.03864	20.0098	4.68183	0.192952	4.77065	0.028002	0.916256	0.192061	178.032	1.60891	179.145	7.83505	193.881	108.878	178.032	1.60891	NA
Spot 50	372.311	57708.9	0.599536	20.0364	6.16456	0.194387	6.32921	0.0282478	1.43426	0.22661	179.573	2.54	180.365	10.4596	190.784	143.511	179.573	2.54	NA
Spot 84	135.11	28511	0.78482	20.3367	9.67324	0.192878	9.76202	0.0284488	1.31359	0.134561	180.832	2.34238	179.082	16.0285	156.06	226.888	180.832	2.34238	NA
Spot 83	63.4305	13603.4	0.702291	21.3585	21.6397	0.184299	22.8954	0.0285491	7.47832	0.32663	181.461	13.381	171.753	36.1929	40.0673	522.887	181.461	13.381	NA
Spot 3	223.003	31213.3	1.28288	20.3765	7.97018	0.193932	8.25898	0.0286601	2.16494	0.262131	182.157	3.88839	179.979	13.6224	151.458	186.997	182.157	3.88839	NA
Spot 92	190.53	32637.1	1.47058	20.995	8.30094	0.18919	9.24375	0.0288079	4.06711	0.439985	183.083	7.34145	175.937	14.9333	80.9247	197.345	183.083	7.34145	NA
Spot 14	468.782	6489.11	0.868268	19.0877	5.34996	0.210355	10.1821	0.029121	8.66331	0.850838	185.044	15.8031	193.85	17.9702	302.458	122.037	185.044	15.8031	NA
Spot 89	243.083	29008.8	1.92675	19.8933	6.8659	0.204566	7.32889	0.0295148	2.56361	0.349795	187.511	4.7378	188.983	12.6385	207.392	159.385	187.511	4.7378	NA
Spot 73	462.968	1571.7	0.719253	17.5507	14.2718	0.233655	16.1818	0.0297419	7.62665	0.47131	188.933	14.2002	213.212	31.1297	490.672	316.248	188.933	14.2002	NA
Spot 86	97.7234	15139.8	0.872037	21.0131	18.3342	0.20304	18.5719	0.0309437	2.96215	0.159496	196.452	5.73142	187.696	31.8369	78.878	438.558	196.452	5.73142	NA
Spot 28	383.057	1679.26	0.887604	16.6178	11.2406	0.269975	14.3296	0.0325385	8.88752	0.62022	206.416	18.0547	242.674	30.9405	609.898	243.663	206.416	18.0547	NA
Spot 37	904.255	61577	1.76648	19.7226	1.24525	0.231289	1.35884	0.033084	0.543871	0.400247	209.821	1.12278	211.262	2.59176	227.388	28.7621	209.821	1.12278	NA
Spot 1	924.588	10475.1	1.70832	19.3557	1.72715	0.235949	2.80554	0.0331227	2.21088	0.788042	210.063	4.5694	215.098	5.43836	270.556	39.6222	210.063	4.5694	NA
Spot 111	863.037	97900	2.26757	19.7264	1.13949	0.235846	1.48874	0.0337423	0.95808	0.643551	213.928	2.01597	215.013	2.8848	226.923	26.3264	213.928	2.01597	NA
Spot 91	647.595	110676	1.27481	19.6868	1.90442	0.238293	1.98358	0.034024	0.554767	0.27968	215.684	1.17675	217.021	3.87586	231.534	43.9752	215.684	1.17675	NA
Spot 70	879.876	123811	1.90154	19.6718	0.996323	0.240782	1.17726	0.0343532	0.627119	0.532694	217.736	1.34266	219.06	2.31969	233.337	22.9982	217.736	1.34266	NA
Spot 42	885.643	116888	1.88646	19.8746	1.62419	0.240511	1.72608	0.0346683	0.584287	0.338504	219.7	1.26205	218.839	3.39804	209.599	37.6567	219.7	1.26205	NA
Spot 98	873.771	242873	2.24764	19.5513	0.976633	0.244792	1.20584	0.0347114	0.70727	0.586539	219.968	1.52952	222.337	2.40779	247.48	22.4853	219.968	1.52952	NA
Spot 82	568.164	98522.1	1.65577	19.3607	1.94054	0.249181	2.94804	0.0349892	2.2193	0.752803	221.698	4.8365	225.91	5.97115	269.972	44.4948	221.698	4.8365	NA
Spot 69	578.082	86573.4	1.73146	19.9361	2.32683	0.242556	2.93542	0.0350712	1.78956	0.609644	222.209	3.90881	220.511	5.81836	202.411	54.0289	222.209	3.90881	NA
Spot 23	884.476	160034	1.93089	19.6858	1.54631	0.246915	1.62879	0.0352532	0.511749	0.314189	223.343	1.12338	224.067	3.27497	231.655	35.6824	223.343	1.12338	NA
Spot 64	733.922	102296	2.85275	19.5899	1.09516	0.24943	1.29267	0.0354389	0.686755	0.531267	224.499	1.51522	226.113	2.62033	242.914	25.2346	224.499	1.51522	NA
Spot 15	1393.93	199645	2.93095	19.6858	0.925945	0.248287	2.29921	0.0354492	2.10452	0.915322	224.563	4.64462	225.184	4.64357	231.649	21.3778	224.563	4.64462	NA
Spot 10	748.321	87527.9	1.75732	19.8556	1.31584	0.247629	1.68893	0.0356603	1.05879	0.626902	225.877	2.35016	224.649	3.40376	211.784	30.4922	225.877	2.35016	NA
Spot 63	524.681	152818	3.8626	19.2432	1.59517	0.257526	1.67678	0.0359416	0.516756	0.308182	227.628	1.15576	232.671	3.48669	283.937	36.4955	227.628	1.15576	NA
Spot 51	473.629	93773.6	2.03002	19.4831	2.87443	0.256872	3.01386	0.0362972	0.906091	0.300641	229.84	2.04587	232.143	6.25439	255.513	66.0932	229.84	2.04587	NA
Spot 94	393.028	45595.1	2.05567	19.7832	2.12021	0.254317	2.43376	0.0364898	1.19495	0.490989	231.038	2.7119	230.077	5.01049	220.281	49.06	231.038	2.7119	NA
Spot 18	791.118	167917	1.64299	19.4226	1.20117	0.259935	1.30477	0.0366161	0.509537	0.390518	231.824	1.16024	234.615	2.73327	262.657	27.5631	231.824	1.16024	NA
Spot 47	263.982	59869.8	2.04263	19.832	3.73221	0.25578	3.86806	0.03679	1.01611	0.262693	232.905	2.32434	231.26	7.9999	214.594	86.4551	232.905	2.32434	NA
Spot 41	337.765	68110.6	1.98085	20.173	3.05771	0.251485	3.32329	0.0367943	1.30179	0.391717	232.932	2.97815	227.781	6.78095	174.917	71.3509	232.932	2.97815	NA
Spot 90	1602.78	57200.1	2.40752	19.5869	0.702643	0.25953	1.00658	0.0368682	0.72076	0.716049	233.391	1.6521	234.288	2.10599	243.311	16.1666	233.391	1.6521	NA
Spot 103	985.375	38476.1	1.84091	19.6913	0.931731	0.266049	2.91512	0.0379956	2.76221	0.947546	240.397	6.51797	239.53	6.22017	231.015	21.532	240.397	6.51797	NA
Spot 22	424.435	11582.5	1.5678	18.9832	3.3578	0.279606	3.89662	0.0384959	1.97708	0.507382	243.503	4.72446	250.345	8.64568	314.943	76.3723	243.503	4.72446	NA
Spot 45	170.491	125791	2.21393	13.7505	1.27656	1.60849	1.36866	0.160412	0.493574	0.360626	959.065	4.3984	973.521	8.5697	1006.27	25.9016	1006.27	25.9016	95.3088
Spot 66	38.8792	25711.5	1.43773	13.2835	4.23566	1.75782	4.44227	0.169349	1.33902	0.301427	1008.53	12.501	1030.04	28.7581	1076.04	85.0636	1076.04	85.0636	93.7252
Spot 74	179.42	114298	0.734306	11.8481	0.55274	2.47736	1.98551	0.21288	1.90703	0.960469	1244.14	21.5771	1265.45	14.3639	1301.82	10.7395	1301.82	10.7395	95.57
Spot 61	134.477	118340	0.851714	9.82092	0.842181	4.12203	1.68907	0.293604	1.46413	0.866828	1659.52	21.422	1658.68	13.803	1657.61	15.598	1657.61	15.598	100.115
Spot 8	111.049	224862	1.41834	9.55331	0.449279	4.24202	0.780164	0.293917	0.637812	0.817536	1661.08	9.33963	1682.19	6.41055	1708.61	8.26646	1708.61	8.26646	97.218
Spot 106	40.0917	58175.1	0.750922	9.35443	1.13063	4.76417	2.46086	0.323224	2.18574	0.888205	1805.45	34.4185	1778.61	20.6551	1747.23	20.7056	1747.23	20.7056	103.332
Spot 96	223.216	368955	4.35269	9.1911	0.357179	5.04584	1.25959	0.336356	1.20789	0.958952	1869.12	19.5985	1827.05	10.6746	1779.42	6.51358	1779.42	6.51358	105.041
Spot 30	320.596	468606	5.0847	9.18244	0.292523	4.81414	0.774415	0.320609	0.717042	0.925914	1792.7	11.2219	1787.37	6.51093	1781.14	5.33305	1781.14	5.33305	100.649
ELM15MC-11
Spot 95	278.53	10950.5	1.31352	21.8276	26.8148	0.0328587	27.1173	0.00520181	4.03876	0.148937	33.4461	1.34731	32.8277	8.75984	-12.1574	657.979	33.4461	1.34731	NA
Spot 38	163.021	2365.71	1.20637	11.0468	194.794	0.0659777	195.005	0.00528608	9.07417	0.046533	33.9865	3.07588	64.8753	123.154	1436.58	543.92	33.9865	3.07588	NA
Spot 63	353.032	9649.56	1.98423	15.5105	55.2174	0.0478499	55.4277	0.00538276	4.82364	0.0870257	34.6065	1.66482	47.4593	25.7058	757.147	1264.99	34.6065	1.66482	NA
Spot 68	164.458	2639.45	1.50975	6.22643	298.741	0.119294	298.766	0.00538714	3.84974	0.0128855	34.6345	1.32977	114.432	334.968	2462.03	166.535	34.6345	1.32977	NA
Spot 25	235.323	6163.02	1.48626	10.8608	38.9521	0.0688472	39.1813	0.00542311	4.23194	0.108009	34.8652	1.47149	67.6049	25.6314	1468.89	770.27	34.8652	1.47149	NA
Spot 90	73.9968	2034.57	1.33834	5.97178	130.143	0.125702	130.766	0.00544431	12.7483	0.09749	35.0011	4.44997	120.228	149.333	2532.35	503.644	35.0011	4.44997	NA
Spot 66	183.127	4617.93	1.13103	8.58823	147.405	0.0874738	147.449	0.00544854	3.63442	0.0246486	35.0282	1.26962	85.1474	120.999	1902.24	26.2382	35.0282	1.26962	NA
Spot 74	3355.09	77726.6	4.44065	21.5725	4.00354	0.0352817	4.44527	0.00552013	1.93188	0.434592	35.4872	0.683687	35.207	1.53823	16.1425	96.2273	35.4872	0.683687	NA
Spot 54	75.7149	1168.58	1.64577	2.40584	194.935	0.316855	195.195	0.00552872	10.0826	0.051654	35.5423	3.57373	279.48	517.485	3966.7	1119.33	35.5423	3.57373	NA
Spot 106	2762.48	68343.8	4.99835	20.5947	3.37687	0.0371885	3.55953	0.00555474	1.12562	0.316226	35.709	0.400836	37.0754	1.29591	126.475	79.5115	35.709	0.400836	NA
Spot 17	3453.51	29394.4	4.57633	21.2955	1.35925	0.0361553	5.47309	0.00558416	5.30162	0.96867	35.8977	1.89787	36.0634	1.93914	47.1313	32.4516	35.8977	1.89787	NA
Spot 9	1874.39	48768.9	4.73677	20.9223	3.03709	0.0368849	3.13682	0.00559701	0.784698	0.250157	35.98	0.281548	36.7781	1.13302	89.2045	72.0079	35.98	0.281548	NA
Spot 67	2336.39	79620.7	4.6556	21.9982	10.8639	0.035095	10.8812	0.00559927	0.613448	0.056377	35.9945	0.220192	35.0238	3.74604	-31.0063	264.049	35.9945	0.220192	NA
Spot 52	100.099	5357.77	1.74418	-7.32684	249.248	-0.105854	249.343	0.00562501	6.86964	0.027551	36.1595	2.47708	-113.607	-308.919	NA	NA	36.1595	2.47708	NA
Spot 109	2593.96	63665.7	3.86997	21.0967	3.13849	0.0369678	3.26595	0.00565637	0.903502	0.276643	36.3606	0.327594	36.8593	1.18222	69.4405	74.6589	36.3606	0.327594	NA
Spot 11	1757.08	40449	5.22795	21.6874	3.069	0.0360714	3.22122	0.00567372	0.978526	0.303775	36.4718	0.355878	35.9812	1.13874	3.34678	73.9202	36.4718	0.355878	NA
Spot 112	169.406	5408.39	1.62926	13.704	139.078	0.057316	139.146	0.0056967	4.34352	0.0312155	36.6191	1.58605	56.591	76.7359	1013.14	553.103	36.6191	1.58605	NA
Spot 15	218.936	5450.72	2.76039	31.2021	36.7159	0.0270939	37.7979	0.00613132	8.97908	0.237555	39.4043	3.52736	27.1446	10.1245	-960.383	1108.73	39.4043	3.52736	NA
Spot 104	3693.9	149514	2.88089	21.3705	2.26386	0.0428173	3.96978	0.00663642	3.26099	0.821455	42.6398	1.38589	42.571	1.65504	38.672	54.1536	42.6398	1.38589	NA
Spot 20	3704.62	29576.3	2.8592	20.2755	2.84589	0.0557395	4.58207	0.00819658	3.59114	0.783738	52.6232	1.88208	55.0759	2.4564	163.081	66.549	52.6232	1.88208	NA
Spot 110	241.505	9120.85	3.36047	20.63	10.3094	0.104559	10.5161	0.0156445	2.0749	0.197307	100.07	2.06033	100.976	10.1082	122.423	243.383	100.07	2.06033	NA
Spot 78	315.119	11843.6	5.02668	22.1694	22.6914	0.098685	23.1083	0.0158673	4.36967	0.189095	101.484	4.39981	95.5618	21.0784	-49.8347	558.259	101.484	4.39981	NA
Spot 101	147.629	6685.57	1.60297	20.9562	14.9167	0.110301	15.1345	0.0167645	2.55817	0.169029	107.175	2.71905	106.24	15.2675	85.363	355.484	107.175	2.71905	NA
Spot 41	69.5085	1830.71	1.3014	13.4608	39.497	0.247988	39.6676	0.0242104	3.67446	0.0926313	154.211	5.59918	224.941	80.2025	1049.37	828.691	154.211	5.59918	NA
Spot 96	949.341	34278.8	1.4511	20.4279	1.09662	0.166835	2.05514	0.0247179	1.73811	0.845737	157.404	2.70272	156.669	2.98367	145.541	25.7062	157.404	2.70272	NA
Spot 48	110.702	12783	0.741526	18.3249	48.1827	0.186289	48.2152	0.0247587	1.77066	0.0367241	157.661	2.75778	173.458	77.0269	394.643	1144.48	157.661	2.75778	NA
Spot 31	122.187	7918.08	0.692896	20.8989	14.8759	0.164311	15.0541	0.0249052	2.3093	0.1534	158.582	3.61746	154.47	21.5749	91.8372	354.076	158.582	3.61746	NA
Spot 35	170.872	27678.5	0.761967	20.4185	25.8099	0.168362	25.8423	0.0249326	1.29385	0.0500672	158.755	2.02897	157.996	37.8294	146.663	614.182	158.755	2.02897	NA
Spot 13	314.543	16765.9	1.49024	20.8542	4.02059	0.16532	4.1073	0.0250045	0.839541	0.204402	159.207	1.32024	155.349	5.9166	96.8774	95.1989	159.207	1.32024	NA
Spot 105	196.318	3351.63	0.795578	19.1089	11.5948	0.182216	11.7252	0.0252535	1.74378	0.148721	160.773	2.76886	169.966	18.3522	299.911	265.22	160.773	2.76886	NA
Spot 60	584.919	26608.8	1.92626	19.8994	6.42414	0.175487	6.48815	0.0253271	0.909075	0.140113	161.235	1.44757	164.17	9.8354	206.677	149.112	161.235	1.44757	NA
Spot 57	207.693	6866.88	0.933171	23.4192	47.1167	0.150001	47.2933	0.025478	4.08392	0.0863529	162.184	6.54085	141.913	62.7159	-185.049	1238.43	162.184	6.54085	NA
Spot 36	160.355	11920.3	0.906101	21.3821	18.7335	0.164561	18.9611	0.0255197	2.929	0.154475	162.446	4.6986	154.687	27.212	37.3777	451.727	162.446	4.6986	NA
Spot 115	171.747	36780.5	0.824839	20.1562	7.77676	0.174581	7.95511	0.0255214	1.67505	0.210563	162.457	2.68724	163.387	12.0063	176.858	181.575	162.457	2.68724	NA
Spot 18	137.188	12697.4	0.744747	20.3648	8.26003	0.172908	8.33943	0.0255384	1.14801	0.137661	162.564	1.84292	161.939	12.4836	152.835	193.761	162.564	1.84292	NA
Spot 73	1067.06	78288.2	2.07953	20.022	3.64353	0.176877	3.67549	0.025685	0.483583	0.13157	163.485	0.780646	165.37	5.60905	192.455	84.7633	163.485	0.780646	NA
Spot 108	660.178	17798.2	1.95209	20.3839	2.82397	0.174444	3.21618	0.0257894	1.53917	0.478569	164.141	2.49451	163.268	4.85062	150.602	66.1701	164.141	2.49451	NA
Spot 19	468.211	54447.8	1.34243	20.3841	13.0249	0.174534	13.0446	0.025803	0.715221	0.0548291	164.227	1.15975	163.346	19.6847	150.572	306.319	164.227	1.15975	NA
Spot 75	533.78	182879	1.07331	20.4307	4.40957	0.174146	4.445	0.0258045	0.560121	0.126011	164.236	0.908302	163.011	6.69421	145.221	103.47	164.236	0.908302	NA
Spot 69	351.504	33389.3	1.08026	21.7416	15.0826	0.164243	15.1088	0.0258986	0.888427	0.058802	164.828	1.44581	154.41	21.6455	-2.63429	365.471	164.828	1.44581	NA
Spot 51	96.399	7615.02	1.4643	28.8343	67.518	0.124023	67.5485	0.0259365	2.02789	0.0300212	165.066	3.30486	118.713	75.8194	-734.165	2115.84	165.066	3.30486	NA
Spot 92	85.0234	4236.57	0.970737	24.95	20.46	0.143915	20.7167	0.0260422	3.25141	0.156946	165.73	5.31987	136.525	26.4706	-345.769	532.301	165.73	5.31987	NA
Spot 23	461.705	7624.87	0.996156	23.4366	8.85044	0.153243	8.8655	0.026048	0.516578	0.0582683	165.766	0.845397	144.772	11.9623	-186.9	221.54	165.766	0.845397	NA
Spot 94	567.97	65565.7	1.0853	20.2575	2.91817	0.177665	3.04152	0.0261028	0.85742	0.281905	166.111	1.40607	166.049	4.65912	165.155	68.2355	166.111	1.40607	NA
Spot 64	695.06	65335	1.63367	20.594	8.87481	0.17627	8.97998	0.026328	1.37036	0.152602	167.525	2.26613	164.846	13.6648	126.556	209.251	167.525	2.26613	NA
Spot 116	247.424	13503.1	0.733774	19.3149	7.37638	0.189509	7.50717	0.0265473	1.39522	0.185851	168.903	2.32596	176.21	12.1448	275.403	169.16	168.903	2.32596	NA
Spot 5	146.698	9128.91	1.53496	20.4916	8.04867	0.178691	8.39648	0.0265569	2.3916	0.284834	168.963	3.98844	166.934	12.9257	138.246	189.283	168.963	3.98844	NA
Spot 1	645.605	30862.1	2.09608	20.1322	1.90937	0.182054	2.02652	0.0265822	0.679037	0.335076	169.122	1.13347	169.826	3.16916	179.63	44.5232	169.122	1.13347	NA
Spot 117	320.008	26481.7	1.66351	20.01	4.7072	0.184701	4.86113	0.0268049	1.21361	0.249656	170.52	2.04232	172.097	7.69547	193.85	109.489	170.52	2.04232	NA
Spot 8	93.4417	284.564	1.14944	17.6502	33.2703	0.20968	33.4208	0.0268414	3.16825	0.0947988	170.749	5.33875	193.284	58.8869	478.166	754.699	170.749	5.33875	NA
Spot 103	148.564	11624.2	1.08693	19.9562	7.32334	0.186609	7.50136	0.0270092	1.6245	0.216561	171.802	2.75407	173.732	11.9789	200.059	170.238	171.802	2.75407	NA
Spot 82	114.162	10501.6	1.88662	20.1779	22.8772	0.185809	22.9049	0.027192	1.12537	0.0491323	172.95	1.92045	173.047	36.4584	174.35	539.901	172.95	1.92045	NA
Spot 86	273.034	18235.5	1.03334	19.7814	7.89951	0.189955	8.08702	0.0272525	1.73136	0.214091	173.33	2.96098	176.591	13.1088	220.461	182.995	173.33	2.96098	NA
Spot 114	287.862	27447.5	0.900744	20.2869	6.15566	0.18692	6.20053	0.0275023	0.744599	0.120086	174.897	1.28477	173.997	9.9153	161.78	144.071	174.897	1.28477	NA
Spot 2	99.5562	23424.9	1.05621	19.2611	7.80832	0.196947	8.3427	0.0275125	2.93784	0.352145	174.961	5.07095	182.54	13.9392	281.825	178.885	174.961	5.07095	NA
Spot 85	265.952	44302.8	1.39429	20.7185	7.12969	0.185475	7.18308	0.0278703	0.874104	0.121689	177.205	1.52786	172.761	11.4117	112.311	168.427	177.205	1.52786	NA
Spot 40	367.03	17216.2	0.802888	20.3385	8.55894	0.189771	8.75194	0.0279929	1.82785	0.208851	177.974	3.20861	176.434	14.1752	155.821	200.669	177.974	3.20861	NA
Spot 33	677.811	103939	3.19688	19.4617	1.94671	0.242313	3.29844	0.0342024	2.66271	0.807263	216.796	5.67666	220.313	6.53267	258.061	44.7326	216.796	5.67666	NA
Spot 3	888.905	5809.98	1.12145	18.9042	5.46078	0.255119	6.71941	0.0349784	3.91541	0.582701	221.631	8.5303	230.726	13.869	324.446	124.068	221.631	8.5303	NA
Spot 84	664.043	88728.2	2.11185	20.2104	3.89495	0.239034	4.72958	0.0350375	2.68296	0.567273	221.999	5.85476	217.629	9.2649	170.594	90.9887	221.999	5.85476	NA
Spot 111	446.08	58492.4	2.60301	19.5155	2.34458	0.249199	2.50056	0.0352715	0.869318	0.34765	223.457	1.90927	225.925	5.06506	251.721	53.9501	223.457	1.90927	NA
Spot 100	474.162	77280.2	2.33902	19.528	3.14766	0.255564	3.26439	0.0361956	0.86515	0.265027	229.209	1.94816	231.086	6.74682	250.207	72.4696	229.209	1.94816	NA
Spot 14	619.857	35342.9	2.63044	19.2497	2.14853	0.260525	2.90472	0.0363725	1.95479	0.67297	230.308	4.42257	235.09	6.09589	283.181	49.1313	230.308	4.42257	NA
Spot 72	1243.24	252632	1.10796	19.3176	2.00398	0.311355	2.0692	0.0436223	0.515414	0.249088	275.247	1.3888	275.231	4.98853	275.072	45.9343	275.247	1.3888	NA
Spot 49	129.859	17770.5	1.04506	19.031	25.1393	0.461283	25.1804	0.0636688	1.43742	0.0570848	397.899	5.54653	385.15	80.8803	309.217	580.546	397.899	5.54653	NA
Spot 97	143.838	21059.7	0.909567	17.6858	4.70572	0.519479	5.62314	0.0666334	3.0783	0.547434	415.841	12.3967	424.803	19.5225	473.727	104.145	415.841	12.3967	87.7808
Spot 91	179.271	129344	10.7502	17.9312	2.73943	0.557717	2.88372	0.0725306	0.900757	0.31236	451.384	3.92679	450.04	10.4839	443.156	60.9413	451.384	3.92679	101.857
Spot 98	40.195	16181.1	1.86348	17.1134	10.0799	0.778127	10.5009	0.0965795	2.94376	0.280334	594.332	16.7135	584.414	46.6929	546.045	220.724	594.332	16.7135	108.843
Spot 83	79.9425	58445.6	2.03903	14.0679	4.07345	1.57541	4.45942	0.160738	1.81478	0.406955	960.879	16.2005	960.56	27.7053	959.81	83.2605	959.81	83.2605	100.111
Spot 76	132.733	87438.6	2.10359	13.8107	3.85349	1.66576	3.89822	0.16685	0.588848	0.151056	994.731	5.42791	995.57	24.7385	997.401	78.3162	997.401	78.3162	99.7323
Spot 88	92.1377	52105.3	1.87378	13.8042	1.51145	1.70548	1.912	0.170748	1.17101	0.612455	1016.23	11.0096	1010.59	12.2389	998.354	30.6964	998.354	30.6964	101.791
Spot 80	122.715	118650	2.37812	13.4196	1.47267	1.82173	1.77099	0.177305	0.983703	0.555453	1052.24	9.55025	1053.31	11.61	1055.55	29.6684	1055.55	29.6684	99.686
Spot 70	174.344	161589	3.09798	13.2033	1.22663	1.98949	1.46985	0.190512	0.809835	0.550964	1124.15	8.35419	1111.95	9.93257	1088.15	24.5641	1088.15	24.5641	103.308
Spot 102	136.491	152037	1.99086	13.1886	0.917305	1.974	1.83917	0.188818	1.59408	0.866739	1114.97	16.3214	1106.67	12.3959	1090.39	18.3576	1090.39	18.3576	102.254
Spot 93	29.6687	24062.7	1.13936	13.0606	6.05681	1.94198	6.20265	0.183954	1.33714	0.215575	1088.54	13.3927	1095.68	41.5964	1109.89	121.097	1109.89	121.097	98.0766
Spot 27	118.881	75515.2	1.98398	13.038	5.07041	2.06793	5.13859	0.195545	0.834336	0.162367	1151.34	8.79709	1138.25	35.1835	1113.36	101.306	1113.36	101.306	103.412
Spot 120	52.6155	39209.5	2.08297	12.9782	1.56606	2.04506	1.76477	0.192495	0.813557	0.460998	1134.88	8.46583	1130.65	12.0351	1122.55	31.2265	1122.55	31.2265	101.099
Spot 56	523.736	38199.6	1.8912	12.7833	1.30435	1.78855	4.58908	0.165823	4.39982	0.958757	989.054	40.3432	1041.3	29.8954	1152.62	25.9108	1152.62	25.9108	85.809
Spot 107	40.7005	57970	2.57049	12.7632	4.82926	2.18469	4.96049	0.202231	1.13345	0.228495	1187.3	12.2908	1176.18	34.5657	1155.75	95.8525	1155.75	95.8525	102.73
Spot 87	230.725	95662.2	5.0327	12.1056	0.844221	2.16794	2.90238	0.190341	2.77689	0.956762	1123.22	28.6246	1170.82	20.1703	1259.93	16.4916	1259.93	16.4916	89.149
Spot 47	37.1589	34763.9	1.02269	12.0701	7.06217	2.60772	7.08612	0.228282	0.58216	0.0821549	1325.49	6.97485	1302.81	52.0532	1265.65	138.064	1265.65	138.064	104.728
Spot 22	168.689	231756	2.32194	11.6544	0.472728	2.73725	0.600102	0.231369	0.369662	0.615999	1341.67	4.47754	1338.63	4.46293	1333.76	9.14296	1333.76	9.14296	100.593
Spot 99	81.6426	60200.6	1.4142	11.3826	1.29491	2.79709	1.428	0.230912	0.601989	0.421561	1339.28	7.27991	1354.76	10.6814	1379.27	24.8888	1379.27	24.8888	97.1007
Spot 55	391.786	97807.2	2.1771	11.3711	0.925323	2.67006	1.86623	0.220202	1.62068	0.868423	1282.94	18.8541	1320.21	13.787	1381.21	17.7805	1381.21	17.7805	92.8851
Spot 53	42.0338	34550.4	1.25949	11.1115	8.23084	3.07745	8.3641	0.248007	1.48711	0.177796	1428.19	19.0506	1427.09	64.1844	1425.44	157.443	1425.44	157.443	100.193
Spot 24	375.184	236896	2.63773	10.9786	0.80434	2.79549	1.12233	0.222589	0.782725	0.697412	1295.54	9.18651	1354.33	8.39363	1448.39	15.3141	1448.39	15.3141	89.447
Spot 29	16.4693	20298.5	2.0501	10.8846	9.63385	3.21957	9.788	0.254161	1.7303	0.176778	1459.9	22.6046	1461.88	75.9737	1464.75	183.437	1464.75	183.437	99.669
Spot 118	22.185	21886.7	0.78224	10.0113	2.9968	3.93879	3.09717	0.285992	0.782109	0.252523	1621.47	11.2125	1621.69	25.0857	1621.96	55.771	1621.96	55.771	99.9699
Spot 10	359.573	10688	1.93273	9.84505	0.478179	3.34893	4.44776	0.239124	4.42198	0.994204	1382.14	55.0115	1492.54	34.7908	1653.06	8.8623	1653.06	8.8623	83.611
Spot 21	22.8624	29834.8	0.90226	9.72747	1.97953	4.23889	2.76601	0.299055	1.93191	0.698447	1686.62	28.6702	1681.58	22.7284	1675.29	36.5836	1675.29	36.5836	100.676
Spot 89	42.9171	57802.9	2.23475	9.61965	1.44099	4.35441	1.60736	0.303799	0.712147	0.443053	1710.12	10.6971	1703.73	13.2735	1695.87	26.5611	1695.87	26.5611	100.841
Spot 77	274.083	360499	2.09714	9.57054	0.412184	4.41842	0.684463	0.306692	0.546437	0.798345	1724.41	8.26777	1715.8	5.66733	1705.29	7.58695	1705.29	7.58695	101.121
Spot 59	57.2695	41448.9	2.3603	9.48537	6.00204	4.26383	6.17802	0.293328	1.46408	0.236981	1658.14	21.4056	1686.41	50.8558	1721.73	110.365	1721.73	110.365	96.3064
Spot 46	201.767	464634	2.94449	9.45168	1.30542	4.5053	1.54356	0.308839	0.82368	0.533623	1734.99	12.5292	1731.95	12.8268	1728.27	23.9639	1728.27	23.9639	100.389
Spot 39	224.52	32950.5	1.80738	9.38558	1.1442	3.84762	2.63352	0.26191	2.37197	0.900684	1499.61	31.7362	1602.77	21.2273	1741.14	20.97	1741.14	20.97	86.1281
Spot 37	346.269	35888.2	1.90547	9.2144	0.253127	4.29534	4.1961	0.287054	4.18846	0.998179	1626.79	60.2215	1692.47	34.5738	1774.8	4.61997	1774.8	4.61997	91.6604
Spot 43	309.824	475980	2.95703	9.1422	0.726779	4.93736	0.982598	0.327374	0.66128	0.672991	1825.64	10.5137	1808.67	8.29692	1789.14	13.2398	1789.14	13.2398	102.04
Spot 30	251.278	16379.8	1.92918	9.06067	0.453457	4.63913	1.58207	0.304856	1.51569	0.958044	1715.34	22.8278	1756.34	13.2161	1805.45	8.24517	1805.45	8.24517	95.0094
Spot 4	70.5394	104033	1.62313	8.87224	0.548298	5.14925	0.853614	0.331341	0.654237	0.766432	1844.88	10.4964	1844.27	7.25806	1843.57	9.92344	1843.57	9.92344	100.071
Spot 26	41.4182	32402.9	0.744419	8.86882	6.40888	5.19334	6.43255	0.33405	0.551305	0.0857055	1857.98	8.89916	1851.52	54.8222	1844.27	116.094	1844.27	116.094	100.744
Spot 32	42.4886	115577	1.01609	8.8201	1.63092	5.04797	1.78179	0.322916	0.717544	0.402709	1803.95	11.2908	1827.41	15.1017	1854.22	29.4794	1854.22	29.4794	97.2888
Spot 42	168.957	282412	1.57097	8.71181	1.8082	5.38678	1.87034	0.340359	0.478074	0.255609	1888.4	7.82581	1882.75	16.0189	1876.52	32.5949	1876.52	32.5949	100.633
Spot 44	216.135	237016	2.54776	8.70749	1.02461	5.51562	1.07961	0.348327	0.340185	0.3151	1926.6	5.66532	1903.03	9.27998	1877.42	18.4669	1877.42	18.4669	102.62
Spot 71	239.403	298157	0.822101	8.45799	0.560725	5.77085	0.670799	0.354002	0.368183	0.548873	1953.68	6.20539	1942.05	5.80529	1929.65	10.0423	1929.65	10.0423	101.245
Spot 79	51.3259	193694	1.01926	8.44342	2.44867	5.75412	2.66381	0.352368	1.04877	0.39371	1945.9	17.6157	1939.54	23.0472	1932.74	43.8476	1932.74	43.8476	100.681
Spot 7	122.486	121735	1.42502	8.03448	0.326572	6.31396	0.583215	0.367924	0.483209	0.828526	2019.63	8.37819	2020.39	5.11225	2021.16	5.78768	2021.16	5.78768	99.924
Spot 65	27.7202	59123.2	1.00249	7.92172	6.09921	6.78428	6.20664	0.389782	1.1498	0.185254	2121.82	20.7883	2083.67	54.9789	2046.17	107.877	2046.17	107.877	103.697
Spot 45	182.587	191481	1.88048	7.66582	1.12559	7.05748	1.23647	0.39238	0.511763	0.413891	2133.86	9.29687	2118.7	10.9972	2104.01	19.7596	2104.01	19.7596	101.419
Spot 34	211.395	289527	11.5436	5.84403	0.214767	11.0021	1.26397	0.466323	1.24559	0.985459	2467.42	25.536	2523.31	11.7653	2568.56	3.59134	2568.56	3.59134	96.0622
Spot 50	153.367	108319	1.32033	5.77375	0.675754	10.5207	1.69474	0.440554	1.55418	0.917065	2353.12	30.6403	2481.74	15.7156	2588.78	11.2746	2588.78	11.2746	90.8971
Spot 6	43.666	124616	1.63318	5.37105	0.670611	13.6399	0.811929	0.531334	0.457723	0.563747	2747.07	10.2381	2725.03	7.68121	2708.72	11.0652	2708.72	11.0652	101.416
Spot 81	37.94	54678	1.55544	4.66254	1.37047	13.7435	7.95445	0.464748	7.8355	0.985046	2460.49	160.298	2732.19	75.4283	2939.66	22.1452	2939.66	22.1452	83.6998
ELM15MC-12
Spot 60	325.622	14133.8	1.35936	47.6249	113.11	0.0144987	113.305	0.00500798	6.63377	0.0585481	32.203	2.13094	14.6161	16.4435	NA	NA	32.203	2.13094	NA
Spot 90	277.425	19292.7	1.33058	26.1149	72.6107	0.027133	72.817	0.00513907	5.47779	0.0752268	33.0437	1.80544	27.1833	19.5338	-464.907	2214.71	33.0437	1.80544	NA
Spot 62	300.569	21076.5	2.19007	28.1506	99.0314	0.0252649	99.0786	0.00515826	3.0574	0.0308583	33.1668	1.01144	25.3348	24.7957	-667.52	NA	33.1668	1.01144	NA
Spot 89	138.77	3111.17	1.47886	15.2951	137.849	0.0467409	137.941	0.00518499	5.04548	0.036577	33.3382	1.67773	46.3842	62.6227	786.584	718.069	33.3382	1.67773	NA
Spot 13	1051.28	17170.4	1.55707	21.4994	14.9839	0.0334302	15.037	0.00521272	1.26179	0.0839123	33.5161	0.421804	33.3894	4.93914	24.2861	361.211	33.5161	0.421804	NA
Spot 66	211.61	6879.36	1.72211	26.8001	44.9303	0.0268268	45.1204	0.0052144	4.13747	0.0916983	33.5268	1.38356	26.8805	11.97	-533.854	1258.66	33.5268	1.38356	NA
Spot 36	263.449	15373.2	2.1787	14.1509	122.603	0.050809	122.618	0.00521463	1.90008	0.0154959	33.5283	0.63541	50.3227	60.2713	947.772	494.214	33.5283	0.63541	NA
Spot 111	330.542	9204.22	1.86724	28.6254	59.5906	0.0251782	59.6477	0.00522727	2.61107	0.0437748	33.6094	0.875279	25.2489	14.8758	-713.878	1802.94	33.6094	0.875279	NA
Spot 88	289.559	11861.7	1.71641	15.9952	24.3531	0.0452563	24.4477	0.00525011	2.14888	0.0878972	33.7559	0.723478	44.943	10.7483	691.905	526.579	33.7559	0.723478	NA
Spot 14	237.732	9022.22	2.21523	14.2382	106.73	0.0509888	106.837	0.00526538	4.78247	0.0447642	33.8537	1.6148	50.4965	52.6767	935.207	396.086	33.8537	1.6148	NA
Spot 80	252.683	10371.9	1.73388	24.8023	51.3594	0.029295	51.6976	0.00526968	5.90381	0.114199	33.8813	1.99504	29.3183	14.9412	-330.472	1403.5	33.8813	1.99504	NA
Spot 95	207.765	15057.2	2.52213	8.24213	146.81	0.0887731	146.946	0.00530664	6.32241	0.0430253	34.1184	2.15141	86.3599	122.243	1975.83	77.7066	34.1184	2.15141	NA
Spot 40	274.09	16028.8	0.94484	26.0197	34.7655	0.028154	35.4654	0.00531301	7.01104	0.197687	34.1592	2.38858	28.192	9.8612	-455.268	940.632	34.1592	2.38858	NA
Spot 19	251.011	11593.4	2.07943	18.1598	43.8052	0.0404504	44.2262	0.00532761	6.08768	0.137649	34.2528	2.07967	40.2637	17.4604	414.91	1025.57	34.2528	2.07967	NA
Spot 20	219.378	4680	2.26954	19.6518	43.6641	0.0373927	43.87	0.00532952	4.24517	0.096767	34.2651	1.45075	37.2753	16.0575	235.685	1053.98	34.2651	1.45075	NA
Spot 8	256.752	5420.73	1.58846	18.0828	29.1351	0.0409279	29.3386	0.00536764	3.45019	0.117599	34.5095	1.18746	40.7296	11.7135	424.403	662.804	34.5095	1.18746	NA
Spot 12	733.071	44823.4	3.17208	23.924	16.9539	0.0310554	17.0085	0.00538852	1.36216	0.0800868	34.6434	0.470632	31.0534	5.20183	-238.603	430.582	34.6434	0.470632	NA
Spot 96	561.76	3980.72	0.672303	16.6858	31.5028	0.0448638	31.7266	0.00542929	3.76181	0.11857	34.9048	1.3095	44.5617	13.833	601.065	698.114	34.9048	1.3095	NA
Spot 38	153.473	7461.65	2.32254	16.2041	57.3466	0.0462386	57.4784	0.0054341	3.89063	0.0676886	34.9357	1.35554	45.8968	25.7989	664.193	1343	34.9357	1.35554	NA
Spot 104	197.506	13846	1.98723	9.67478	171.96	0.0774539	172.027	0.0054348	4.80955	0.0279581	34.9401	1.67592	75.7484	126.212	1685.33	242.389	34.9401	1.67592	NA
Spot 81	485.821	20760.7	1.58585	21.1561	18.3747	0.0354419	18.6665	0.00543816	3.28796	0.176142	34.9617	1.14641	35.3641	6.4877	62.7458	440.865	34.9617	1.14641	NA
Spot 15	397.879	20703.3	1.99236	24.6797	20.0302	0.0304257	20.1515	0.00544603	2.2078	0.10956	35.0121	0.770903	30.4331	6.0418	-317.752	518.03	35.0121	0.770903	NA
Spot 24	273.614	23250.2	1.56155	18.833	38.3227	0.039873	38.6072	0.00544624	4.67802	0.121169	35.0134	1.63349	39.7	15.0324	333.016	899.284	35.0134	1.63349	NA
Spot 100	219.77	8400.28	1.69286	26.2146	62.1221	0.0290951	62.8179	0.00553175	9.32347	0.148421	35.5617	3.30645	29.1211	18.0353	-474.994	1808.06	35.5617	3.30645	NA
Spot 93	130.151	5360.42	0.922931	9.95828	99.5198	0.0773193	99.7742	0.00558433	7.12009	0.0713621	35.8988	2.54892	75.6215	72.8343	1631.84	NA	35.8988	2.54892	NA
Spot 6	143.833	6678.1	0.863651	19.5767	40.2943	0.0396412	40.4852	0.0056284	3.9263	0.0969812	36.1813	1.41661	39.4737	15.6756	244.492	964.07	36.1813	1.41661	NA
Spot 110	256.66	14921	2.7919	40.6942	70.2491	0.0191125	70.4556	0.00564092	5.39114	0.0765182	36.2615	1.94942	19.2234	13.4174	NA	NA	36.2615	1.94942	NA
Spot 94	211.262	12073.1	0.462886	25.7303	43.5557	0.0305976	43.9263	0.00570992	5.69451	0.129638	36.7038	2.08416	30.6025	13.2427	-425.849	1190.35	36.7038	2.08416	NA
Spot 107	115.325	6144.57	1.27164	22.1319	70.5805	0.0357257	70.9831	0.00573453	7.54942	0.106355	36.8615	2.77489	35.6423	24.8661	-45.7153	1972.74	36.8615	2.77489	NA
Spot 99	66.6105	3130.98	0.563326	-0.703512	832.434	-1.12512	832.487	0.00574077	9.35107	0.0112327	36.9016	3.44083	NA	NA	NA	NA	36.9016	3.44083	NA
Spot 33	103.631	13251.8	1.17007	17.9993	29.0319	0.105782	29.1211	0.0138091	2.27762	0.0782119	88.4099	1.99989	102.099	28.2938	434.721	659.19	88.4099	1.99989	NA
Spot 115	263.402	25079.2	2.01054	20.3265	10.4949	0.0952826	10.5963	0.0140467	1.46229	0.138	89.9211	1.30578	92.4124	9.36019	157.237	246.198	89.9211	1.30578	NA
Spot 49	454.586	52896.7	3.45918	22.1285	9.57308	0.0882719	9.70006	0.0141668	1.56435	0.161273	90.6845	1.40869	85.8923	7.98911	-45.3451	233.204	90.6845	1.40869	NA
Spot 119	146.869	16258.4	0.606277	18.871	10.3662	0.118094	12.6794	0.0161629	7.3013	0.575838	103.36	7.48643	113.342	13.5989	328.428	235.754	103.36	7.48643	NA
Spot 73	371.315	61080.7	2.08787	21.0804	17.9784	0.112358	18.0214	0.0171783	1.24446	0.0690544	109.798	1.35482	108.12	18.4852	71.2856	430.513	109.798	1.35482	NA
Spot 87	497.872	34230.7	0.672489	20.4789	7.81393	0.148492	8.97196	0.0220551	4.40892	0.491411	140.631	6.13317	140.58	11.7791	139.711	183.698	140.631	6.13317	NA
Spot 75	211.812	16507.3	2.56395	21.4511	11.7222	0.142456	12.6628	0.022163	4.78924	0.378214	141.311	6.69411	135.229	16.0338	29.6782	281.787	141.311	6.69411	NA
Spot 70	92.7865	6793.44	1.00445	17.3175	29.4219	0.195468	31.0101	0.0245505	9.79663	0.315918	156.351	15.1329	181.284	51.5279	520.076	658.795	156.351	15.1329	NA
Spot 10	332.843	61452.3	1.61659	21.039	6.17122	0.163817	6.20261	0.0249966	0.623225	0.100478	159.158	0.979765	154.038	8.8652	75.9562	146.746	159.158	0.979765	NA
Spot 108	228.121	31700.1	1.20234	20.353	8.96215	0.169966	9.02421	0.0250893	1.0565	0.117075	159.74	1.66693	159.389	13.3123	154.153	210.22	159.74	1.66693	NA
Spot 5	303.25	60403.8	0.586892	20.6656	10.4146	0.167664	10.4602	0.0251297	0.976073	0.093313	159.995	1.54244	157.39	15.2519	118.358	246.063	159.995	1.54244	NA
Spot 79	265.946	50831.7	0.719032	20.4215	4.19095	0.169687	4.34302	0.0251324	1.13919	0.262305	160.011	1.8004	159.147	6.39744	146.323	98.3299	160.011	1.8004	NA
Spot 105	174.178	41150.5	1.62825	19.4122	12.8217	0.178801	12.9025	0.0251735	1.44158	0.111729	160.27	2.28194	167.028	19.8741	263.872	295.361	160.27	2.28194	NA
Spot 9	170.478	35853.8	0.70644	20.7026	8.10127	0.167851	8.25207	0.0252027	1.57041	0.190305	160.454	2.48868	157.552	12.0434	114.145	191.383	160.454	2.48868	NA
Spot 69	233.484	37986.8	0.765256	20.7779	11.1795	0.167486	11.2062	0.0252394	0.773707	0.0690428	160.684	1.22786	157.235	16.325	105.545	264.858	160.684	1.22786	NA
Spot 1	143.136	23716.5	1.02308	21.1939	13.6922	0.164318	13.7359	0.0252577	1.09406	0.0796496	160.799	1.73747	154.476	19.6858	58.5434	327.693	160.799	1.73747	NA
Spot 28	359.714	57534.5	0.805581	20.6434	3.50031	0.168919	3.56747	0.0252907	0.688978	0.193128	161.007	1.09556	158.481	5.23467	120.87	82.4773	161.007	1.09556	NA
Spot 72	1426.3	394839	1.56119	20.1305	1.07719	0.173388	1.15059	0.0253146	0.404392	0.351464	161.157	0.643629	162.355	1.72635	179.833	25.0949	161.157	0.643629	NA
Spot 92	179.885	38589.7	0.825712	19.3543	5.83361	0.18043	6.11111	0.0253271	1.82061	0.297918	161.235	2.89906	168.43	9.48485	270.727	133.825	161.235	2.89906	NA
Spot 44	479.678	36913.4	1.80714	20.0803	6.55502	0.174863	6.5853	0.0254664	0.630737	0.0957796	162.112	1.00975	163.631	9.95246	185.645	152.775	162.112	1.00975	NA
Spot 22	479.887	157483	1.12707	19.9354	2.48668	0.17721	2.7842	0.0256219	1.25228	0.449781	163.089	2.01671	165.657	4.25567	202.508	57.7509	163.089	2.01671	NA
Spot 113	119.709	16436.7	0.943105	19.1572	13.7984	0.184635	14.4071	0.0256534	4.14366	0.287612	163.287	6.68109	172.041	22.8039	294.157	316.314	163.287	6.68109	NA
Spot 41	383.658	9262.68	0.936123	18.858	9.01225	0.187712	9.14104	0.0256736	1.52903	0.167271	163.414	2.46724	174.675	14.6702	329.973	204.819	163.414	2.46724	NA
Spot 65	258.292	34353.8	1.076	20.5192	7.55992	0.173049	7.62151	0.025753	0.966975	0.126875	163.913	1.56502	162.061	11.4167	135.081	177.862	163.913	1.56502	NA
Spot 56	330.081	92270	1.03588	20.047	7.61976	0.177204	7.74107	0.0257645	1.36505	0.176338	163.985	2.21024	165.651	11.8324	189.511	177.508	163.985	2.21024	NA
Spot 46	360.571	35844.3	1.02016	20.7183	4.83971	0.171501	5.21106	0.0257703	1.93194	0.370738	164.022	3.12882	160.721	7.7462	112.371	114.273	164.022	3.12882	NA
Spot 55	200.091	42089.7	1.37321	20.9119	13.8098	0.169955	13.8435	0.0257767	0.964922	0.0697024	164.062	1.56309	159.38	20.422	90.3336	328.57	164.062	1.56309	NA
Spot 82	277.946	43071.5	1.89682	20.7941	11.1203	0.171885	11.1787	0.0259225	1.14149	0.102113	164.978	1.85932	161.054	16.65	103.753	263.539	164.978	1.85932	NA
Spot 116	175.917	36728.8	0.887568	18.7554	15.0946	0.190593	15.2027	0.0259259	1.80986	0.119049	164.999	2.94836	177.135	24.7161	342.354	343.397	164.999	2.94836	NA
Spot 53	343.456	50630.3	3.42989	20.0303	3.16668	0.179093	3.85523	0.0260175	2.19885	0.570355	165.575	3.59438	167.28	5.94588	191.498	73.6734	165.575	3.59438	NA
Spot 83	85.6	4826.35	1.0813	18.3969	41.7769	0.195187	41.959	0.0260433	3.90458	0.0930571	165.737	6.38885	181.046	69.687	385.847	978.408	165.737	6.38885	NA
Spot 71	63.9396	14684.5	0.698116	19.2445	28.8221	0.186672	29.2652	0.0260546	5.07376	0.173372	165.808	8.30543	173.786	46.7775	283.803	671.684	165.808	8.30543	NA
Spot 27	230.264	30370.2	1.19526	21.1953	11.9787	0.170188	12.0395	0.0261617	1.20795	0.100332	166.481	1.98526	159.582	17.7809	58.3888	286.435	166.481	1.98526	NA
Spot 64	142.19	3362.84	0.846252	16.9451	19.9488	0.213259	21.5277	0.026209	8.09246	0.37591	166.778	13.3234	196.284	38.4404	567.635	438.24	166.778	13.3234	NA
Spot 61	134.238	18563.2	0.675785	20.6379	15.8509	0.176378	16.215	0.0264002	3.41694	0.210727	167.979	5.6656	164.939	24.6905	121.508	375.464	167.979	5.6656	NA
Spot 117	287.544	9177.79	1.26102	19.4891	10.54	0.186944	10.5508	0.0264243	0.477476	0.0452549	168.13	0.792403	174.019	16.8748	254.811	242.92	168.13	0.792403	NA
Spot 7	251.946	31074.1	0.682194	19.7037	6.82695	0.186357	6.94067	0.0266312	1.25124	0.180277	169.43	2.09237	173.516	11.0708	229.553	157.837	169.43	2.09237	NA
Spot 2	91.2128	13088.3	0.549609	20.8338	17.8725	0.178971	18.2532	0.0270427	3.70868	0.203179	172.013	6.29505	167.174	28.1423	99.1892	425.727	172.013	6.29505	NA
Spot 47	172.156	37146	1.26731	19.3202	14.5388	0.193084	14.5737	0.0270555	1.0075	0.0691315	172.093	1.71091	179.257	23.9527	274.769	334.602	172.093	1.71091	NA
Spot 48	150.622	46171	1.10417	19.3655	8.36786	0.195134	9.01038	0.0274069	3.34153	0.370854	174.299	5.74621	181	14.939	269.401	192.184	174.299	5.74621	NA
Spot 51	167.547	30200.6	1.40579	21.4762	20.4441	0.177414	20.5293	0.027634	1.8686	0.0910209	175.723	3.23921	165.833	31.4197	26.8597	494.685	175.723	3.23921	NA
Spot 77	203.732	46751.5	1.49262	20.3871	16.6148	0.187043	16.6226	0.0276565	0.508677	0.0306015	175.864	0.882489	174.103	26.6014	150.275	391.704	175.864	0.882489	NA
Spot 86	43.5894	8734.01	2.00749	17.4438	37.7715	0.218871	38.2203	0.0276904	5.84016	0.152802	176.077	10.144	200.97	69.7972	504.109	859.983	176.077	10.144	NA
Spot 84	187.988	56084.1	0.989271	19.763	9.20097	0.193351	9.27786	0.027714	1.19197	0.128475	176.225	2.07211	179.485	15.2647	222.611	213.158	176.225	2.07211	NA
Spot 120	102.976	26570.6	1.30036	21.5792	26.8546	0.178405	26.938	0.0279217	2.11707	0.0785905	177.528	3.70711	166.687	41.4332	15.3915	655.579	177.528	3.70711	NA
Spot 37	179.493	95255.9	1.55128	19.5892	11.2457	0.197677	11.2978	0.0280849	1.08398	0.095946	178.551	1.9089	183.159	18.9362	243.001	259.828	178.551	1.9089	NA
Spot 109	1395.87	12084.3	2.29379	19.3932	1.55188	0.22353	1.7784	0.0314401	0.868557	0.488392	199.555	1.7067	204.844	3.29901	266.133	35.625	199.555	1.7067	NA
Spot 39	823.745	12654.4	1.65719	18.9848	3.8067	0.235564	5.1454	0.0324349	3.46183	0.672799	205.769	7.01089	214.781	9.96108	314.774	86.6157	205.769	7.01089	NA
Spot 63	872.631	145588	0.887626	19.8899	2.42805	0.230275	2.69796	0.0332183	1.17624	0.435975	210.659	2.43781	210.425	5.12759	207.813	56.3169	210.659	2.43781	NA
Spot 85	132.037	27252.5	1.48997	19.4955	10.7474	0.236245	10.78	0.0334038	0.838943	0.0778237	211.816	1.74814	215.341	20.9204	254.058	247.762	211.816	1.74814	NA
Spot 106	812.053	264824	1.41552	20.0003	2.32529	0.231913	2.48149	0.0336404	0.866495	0.349183	213.292	1.81793	211.777	4.74341	194.978	54.0675	213.292	1.81793	NA
Spot 30	761.315	248344	2.08785	19.834	1.01364	0.234599	1.19359	0.033747	0.630228	0.52801	213.957	1.32629	213.988	2.30296	214.355	23.4675	213.957	1.32629	NA
Spot 42	1027.03	322964	2.09626	19.7476	1.94315	0.236263	2.72164	0.0338384	1.90565	0.700185	214.527	4.02086	215.356	5.2814	224.426	44.9281	214.527	4.02086	NA
Spot 23	532.117	48126.3	2.16648	20.0551	3.23736	0.235034	3.33374	0.0341865	0.795811	0.238714	216.697	1.69584	214.346	6.44198	188.572	75.3683	216.697	1.69584	NA
Spot 45	541.585	27116.8	2.26618	19.0393	5.53359	0.248368	5.86324	0.0342962	1.9383	0.330585	217.381	4.14324	225.25	11.8452	308.217	126.1	217.381	4.14324	NA
Spot 58	600.844	27028	2.21478	19.2026	3.12771	0.247664	3.23604	0.0344924	0.830282	0.256573	218.603	1.78459	224.677	6.52253	288.755	71.4687	218.603	1.78459	NA
Spot 16	1057.64	266369	1.981	19.6208	0.997982	0.246905	1.17549	0.0351353	0.621134	0.528404	222.609	1.3591	224.059	2.36344	239.334	23.0225	222.609	1.3591	NA
Spot 21	594.891	43083.8	5.6576	19.577	2.65173	0.24834	8.472	0.0352607	8.04631	0.949753	223.389	17.6668	225.227	17.1147	244.469	61.1047	223.389	17.6668	NA
Spot 118	404.358	170169	1.49749	19.9588	4.17557	0.246653	4.61267	0.0357043	1.95992	0.424899	226.151	4.35553	223.854	9.26692	199.786	96.9912	226.151	4.35553	NA
Spot 4	181.081	2441.33	1.9123	17.1631	9.75384	0.287777	10.0087	0.035822	2.24407	0.224213	226.883	5.00288	256.808	22.714	539.749	213.786	226.883	5.00288	NA
Spot 57	124.467	36082.6	2.44995	13.4468	4.01681	0.914851	7.27924	0.0892212	6.07064	0.833965	550.929	32.0559	659.633	35.327	1051.47	80.9722	550.929	32.0559	52.3963
Spot 35	189.112	141601	2.2258	13.712	1.09011	1.73449	1.13081	0.172493	0.300683	0.265899	1025.83	2.85159	1021.42	7.28323	1011.95	22.0985	1011.95	22.0985	101.371
Spot 91	62.0598	115144	2.00506	13.3835	3.04927	1.88211	3.26175	0.18269	1.158	0.355025	1081.65	11.5311	1074.81	21.6312	1060.97	61.379	1060.97	61.379	101.949
Spot 102	105.295	201576	1.40334	13.3561	2.60427	1.87716	2.68894	0.181836	0.66944	0.248961	1076.99	6.63975	1073.06	17.8153	1065.1	52.3977	1065.1	52.3977	101.117
Spot 26	64.5453	59951.2	1.4775	13.2658	2.48828	1.92	2.64586	0.184728	0.899481	0.339958	1092.75	9.04118	1088.07	17.6669	1078.72	49.9547	1078.72	49.9547	101.301
Spot 11	48.4865	65299.8	1.36961	13.1662	2.75015	1.88338	2.85356	0.179844	0.761224	0.266763	1066.12	7.48003	1075.25	18.9279	1093.83	55.0855	1093.83	55.0855	97.4676
Spot 50	90.3939	212726	1.92436	13.156	2.18918	1.92992	2.21929	0.184145	0.364357	0.164177	1089.58	3.6526	1091.51	14.8443	1095.38	43.8111	1095.38	43.8111	99.4707
Spot 3	80.0473	116637	1.00238	13.1127	1.8573	1.97673	1.90733	0.187991	0.433993	0.22754	1110.48	4.42717	1107.61	12.8614	1101.98	37.1349	1101.98	37.1349	100.772
Spot 67	109.74	18770.4	1.9381	13.0478	3.14136	1.935	8.07929	0.183112	7.44357	0.921315	1083.96	74.2695	1093.27	54.1362	1111.85	62.7465	1111.85	62.7465	97.4909
Spot 101	116.067	197431	2.42213	12.7194	1.89602	2.16589	2.03023	0.199802	0.725914	0.357552	1174.26	7.7928	1170.16	14.1041	1162.58	37.604	1162.58	37.604	101.005
Spot 112	34.5868	61131.9	2.43047	12.7135	8.3835	1.99092	8.53203	0.183576	1.58507	0.185779	1086.48	15.8485	1112.43	57.7296	1163.48	166.432	1163.48	166.432	93.3818
Spot 32	179.295	61051.6	1.17536	11.0697	1.10645	2.78604	4.61693	0.223678	4.48239	0.970859	1301.28	52.8194	1351.8	34.5106	1432.64	21.1112	1432.64	21.1112	90.8311
Spot 59	185.319	101066	1.16018	9.89427	0.985893	4.04735	1.39709	0.290438	0.989887	0.708535	1643.72	14.3622	1643.77	11.3757	1643.81	18.294	1643.81	18.294	99.9941
Spot 17	157.975	552128	1.44499	8.84048	0.525289	4.44041	4.49684	0.284707	4.46605	0.993154	1615.02	63.8042	1719.91	37.2841	1850.05	9.49764	1850.05	9.49764	87.2959
Spot 43	72.0603	204235	1.15482	8.52632	0.88363	5.64526	1.05032	0.349096	0.567782	0.540579	1930.28	9.47114	1923.04	9.06017	1915.23	15.8538	1915.23	15.8538	100.786
Spot 114	429.383	129724	1.08799	6.06746	0.161115	9.99719	2.61096	0.43993	2.60598	0.998094	2350.33	51.3264	2434.52	24.105	2505.64	2.71083	2505.64	2.71083	93.8015
Spot 31	61.748	349247	0.677805	5.36148	0.496971	13.6576	0.848609	0.531078	0.687864	0.810578	2745.99	15.3809	2726.26	8.02894	2711.67	8.19776	2711.67	8.19776	101.266
ELM15MC-16
Spot 91	436.211	13567.7	0.981195	20.6608	5.44708	0.0866108	5.71806	0.0129783	1.73941	0.304195	83.1251	1.4366	84.3412	4.62785	118.887	128.475	83.1251	1.4366	NA
Spot 15	291.143	10773.2	1.06788	21.5972	3.84482	0.0829307	4.27052	0.0129901	1.85868	0.435235	83.2001	1.53649	80.8966	3.32068	13.3974	92.4697	83.2001	1.53649	NA
Spot 62	755.296	38280.4	1.11131	21.4832	2.74443	0.0837551	3.15221	0.0130499	1.55064	0.491922	83.5811	1.28768	81.6692	2.47358	26.1041	65.8363	83.5811	1.28768	NA
Spot 94	294.808	19802.4	1.76241	21.0799	12.8232	0.0875532	12.8896	0.0133857	1.30685	0.101387	85.717	1.11278	85.2215	10.5368	71.3354	306.007	85.717	1.11278	NA
Spot 53	324.001	23919.2	1.49302	21.2408	5.31264	0.0881283	5.45831	0.0135764	1.25258	0.229482	86.9306	1.08157	85.7583	4.48876	53.2176	126.828	86.9306	1.08157	NA
Spot 97	185.986	1905.16	1.68004	17.8015	13.5463	0.105807	14.0452	0.0136605	3.71024	0.264164	87.4653	3.22326	102.122	13.6464	459.29	301.637	87.4653	3.22326	NA
Spot 29	93.3983	3125.26	0.730312	26.0195	23.1587	0.0736834	23.4817	0.0139049	3.8815	0.165299	89.0193	3.43153	72.1888	16.364	-455.251	617.586	89.0193	3.43153	NA
Spot 11	253.574	12676.4	2.02866	20.3997	5.47709	0.101257	6.2369	0.0149812	2.98336	0.478341	95.8587	2.83866	97.9359	5.8229	148.83	128.479	95.8587	2.83866	NA
Spot 40	332.048	6138.31	1.60957	20.5255	6.06428	0.102643	6.38904	0.01528	2.01106	0.314767	97.7561	1.9511	99.2135	6.03903	134.356	142.649	97.7561	1.9511	NA
Spot 65	710.861	54499.7	1.42815	20.9775	2.84942	0.103891	2.89481	0.0158063	0.510573	0.176375	101.097	0.512148	100.362	2.76632	82.9111	67.6292	101.097	0.512148	NA
Spot 14	591.036	53800.9	1.51274	21.3391	1.57748	0.103232	1.80808	0.0159768	0.883567	0.488678	102.179	0.895702	99.7555	1.71789	42.2158	37.7114	102.179	0.895702	NA
Spot 80	784.132	51551.3	1.96559	20.569	1.92399	0.12002	2.05443	0.0179046	0.72036	0.350638	114.4	0.816819	115.09	2.23537	129.391	45.2677	114.4	0.816819	NA
Spot 21	844.65	72946.9	1.59343	20.7286	2.64859	0.12009	3.96999	0.0180541	2.95732	0.74492	115.346	3.38081	115.153	4.3219	111.156	62.5317	115.346	3.38081	NA
Spot 20	411.985	44385.4	1.69231	20.3657	2.20293	0.137615	6.12684	0.0203266	5.71711	0.933124	129.72	7.3421	130.917	7.52568	152.711	51.6319	129.72	7.3421	NA
Spot 85	259.971	36491.5	1.69931	20.1736	5.35696	0.161008	5.41548	0.0235575	0.793951	0.146608	150.1	1.17796	151.585	7.62582	174.845	125.053	150.1	1.17796	NA
Spot 41	383.919	33471.5	0.997456	20.1658	3.47268	0.165864	3.65772	0.0242587	1.14864	0.314031	154.515	1.75371	155.823	5.28383	175.747	81.007	154.515	1.75371	NA
Spot 90	204.32	3672.74	1.1458	18.8524	9.77929	0.183554	9.90332	0.0250974	1.56241	0.157766	159.791	2.4659	171.114	15.5962	330.685	222.29	159.791	2.4659	NA
Spot 76	124.21	15256.4	0.767118	20.5964	6.17596	0.168264	6.3705	0.025135	1.56229	0.245239	160.028	2.46933	157.911	9.31675	126.286	145.476	160.028	2.46933	NA
Spot 82	81.8034	10877.9	0.792577	21.6361	13.3436	0.161069	13.586	0.0252749	2.55525	0.188079	160.907	4.06069	151.638	19.1394	9.0884	322.286	160.907	4.06069	NA
Spot 10	622.197	46321.6	0.415608	20.2031	1.48025	0.172712	2.05834	0.0253069	1.43026	0.694861	161.108	2.27572	161.77	3.07808	171.44	34.5537	161.108	2.27572	NA
Spot 34	477.913	83515.3	1.64283	20.0663	2.102	0.174486	2.7955	0.0253937	1.84294	0.659252	161.655	2.94215	163.305	4.21701	187.276	48.9329	161.655	2.94215	NA
Spot 60	589.95	78303.1	1.0145	19.8389	1.77461	0.17649	1.86091	0.0253943	0.560115	0.30099	161.658	0.894212	165.036	2.83457	213.784	41.1215	161.658	0.894212	NA
Spot 63	389.364	29146.2	3.77109	20.5776	2.94878	0.170675	3.04578	0.0254721	0.76252	0.250353	162.147	1.22099	160.005	4.50884	128.428	69.3764	162.147	1.22099	NA
Spot 98	102.22	6098.75	0.695412	19.4494	28.2218	0.181237	28.2844	0.0255653	1.88112	0.0665074	162.733	3.02289	169.125	44.092	259.483	660.014	162.733	3.02289	NA
Spot 36	297.28	38604.8	1.44964	20.5126	2.47681	0.17201	2.69232	0.0255901	1.05546	0.392026	162.889	1.69769	161.162	4.01218	135.827	58.2308	162.889	1.69769	NA
Spot 4	780.339	53328.8	1.82279	20.3641	1.24149	0.173365	1.30461	0.025605	0.400895	0.307291	162.983	0.645199	162.335	1.95722	152.908	29.0815	162.983	0.645199	NA
Spot 81	199.205	19200.8	1.24653	20.9493	4.44075	0.16937	4.58	0.0257338	1.12078	0.244711	163.792	1.81262	158.872	6.73575	86.1489	105.362	163.792	1.81262	NA
Spot 68	115.888	13358	1.24218	21.5158	7.04481	0.165129	7.28207	0.025768	1.84367	0.25318	164.007	2.98561	155.183	10.4797	22.4432	169.264	164.007	2.98561	NA
Spot 24	302.351	27079.5	1.32224	20.5147	5.10999	0.173929	5.18079	0.0258782	0.853567	0.164756	164.7	1.38802	162.823	7.79406	135.615	120.157	164.7	1.38802	NA
Spot 22	326.025	26525.9	1.49112	20.4274	2.62839	0.175148	2.83237	0.0259488	1.05539	0.372616	165.143	1.72076	163.877	4.28642	145.643	61.6792	165.143	1.72076	NA
Spot 92	117.662	13884.1	1.31888	21.4233	12.539	0.167474	12.6956	0.0260215	1.98783	0.156576	165.6	3.24993	157.224	18.4941	32.8181	301.374	165.6	3.24993	NA
Spot 70	350.398	31927.6	1.20671	20.5932	2.25923	0.174279	2.6016	0.0260296	1.29006	0.495869	165.651	2.10977	163.126	3.92055	126.651	53.1687	165.651	2.10977	NA
Spot 74	531.056	50130.6	1.35692	20.4487	1.69213	0.175594	1.93572	0.026042	0.940056	0.485638	165.729	1.53809	164.262	2.93579	143.18	39.699	165.729	1.53809	NA
Spot 103	593.383	37216.5	1.43863	20.2194	9.96495	0.178343	9.99185	0.0261531	0.732764	0.0733362	166.427	1.20391	166.634	15.3565	169.549	233.179	166.427	1.20391	NA
Spot 49	364.519	96920.2	1.67182	20.3288	2.6628	0.177499	2.75327	0.0261701	0.699972	0.254233	166.533	1.15076	165.906	4.2142	156.94	62.3412	166.533	1.15076	NA
Spot 42	607.344	153405	0.998506	20.2327	1.50925	0.17913	4.61415	0.0262857	4.36034	0.944992	167.26	7.1993	167.311	7.11762	168.017	35.2449	167.26	7.1993	NA
Spot 107	415.26	30490.7	0.463465	20.3531	7.61301	0.178586	7.72966	0.0263619	1.33778	0.173071	167.738	2.21502	166.843	11.8931	154.135	178.498	167.738	2.21502	NA
Spot 55	211.263	32935	0.729905	20.2726	5.76392	0.179437	6.13487	0.0263828	2.10094	0.342458	167.869	3.48131	167.576	9.47732	163.412	134.859	167.869	3.48131	NA
Spot 57	158.541	6965.82	0.791069	20.4104	5.81541	0.179443	6.1361	0.0265629	1.95773	0.319052	169.001	3.26559	167.581	9.47948	147.589	136.457	169.001	3.26559	NA
Spot 78	356.218	49877.1	1.31087	20.062	2.50811	0.182706	2.92381	0.0265844	1.50269	0.51395	169.136	2.50854	170.387	4.58626	187.771	58.3596	169.136	2.50854	NA
Spot 93	184.075	24994.6	1.12623	21.5108	7.06121	0.171516	7.31182	0.0267583	1.89791	0.259567	170.228	3.18848	160.734	10.87	22.9983	169.641	170.228	3.18848	NA
Spot 28	284.541	58816.6	1.54231	20.1294	2.04857	0.184349	3.17043	0.0269134	2.41971	0.763213	171.202	4.08807	171.796	5.01086	179.959	47.7506	171.202	4.08807	NA
Spot 35	219.67	24184	1.02347	19.5426	5.80027	0.190789	5.86937	0.0270417	0.897997	0.152997	172.007	1.52419	177.302	9.54888	248.526	133.612	172.007	1.52419	NA
Spot 73	239.016	27139.1	0.64304	21.2099	4.31661	0.176056	4.61912	0.0270824	1.64412	0.355939	172.262	2.7947	164.661	7.02132	56.7209	102.976	172.262	2.7947	NA
Spot 19	1200.52	61823.1	0.656244	20.0814	0.690426	0.187485	1.28763	0.0273061	1.08688	0.844092	173.666	1.86234	174.481	2.06424	185.519	16.0902	173.666	1.86234	NA
Spot 108	206.799	23782.4	1.03993	21.1167	12.7991	0.180967	12.8374	0.0277156	0.990058	0.0771231	176.235	1.7212	168.892	19.9767	67.1867	305.665	176.235	1.7212	NA
Spot 26	67.4923	7919.78	1.21257	20.6411	7.74848	0.186411	8.12235	0.0279064	2.43593	0.299904	177.432	4.26317	173.562	12.959	121.145	182.781	177.432	4.26317	NA
Spot 33	213.517	30342.4	1.44638	19.6682	3.14352	0.197318	3.59054	0.0281469	1.735	0.483216	178.94	3.06192	182.854	6.0083	233.764	72.5722	178.94	3.06192	NA
Spot 8	210.842	2218.76	1.1465	19.1177	7.93423	0.203695	8.11591	0.0282433	1.70764	0.210407	179.544	3.02367	188.248	13.9463	298.856	181.246	179.544	3.02367	NA
Spot 54	58.8936	5475.44	0.955629	20.5529	14.9327	0.196587	15.2826	0.029304	3.2512	0.212739	186.191	5.96685	182.234	25.4993	131.236	352.853	186.191	5.96685	NA
Spot 5	815.005	94505.5	1.27235	19.8261	0.748715	0.229407	0.982022	0.032987	0.635448	0.647081	209.216	1.30811	209.709	1.86064	215.276	17.3289	209.216	1.30811	NA
Spot 48	953.802	11457	1.87027	19.6954	1.39942	0.23537	1.82883	0.0336213	1.17739	0.643795	213.173	2.46884	214.622	3.53802	230.527	32.321	213.173	2.46884	NA
Spot 47	631.9	78536.9	2.18599	19.7863	1.26776	0.236022	1.81842	0.03387	1.30363	0.716899	214.724	2.75309	215.158	3.52577	219.902	29.3316	214.724	2.75309	NA
Spot 100	441.141	99023	1.86705	19.0326	5.99283	0.245902	6.04894	0.0339437	0.821986	0.135889	215.183	1.73958	223.242	12.1229	309.068	136.561	215.183	1.73958	NA
Spot 38	1199.82	158995	1.58061	19.7546	0.566907	0.237433	0.727377	0.034018	0.455734	0.626544	215.647	0.966519	216.316	1.41713	223.605	13.1038	215.647	0.966519	NA
Spot 43	346.34	37097.5	2.52289	19.8851	2.61953	0.238534	2.78617	0.0344015	0.949087	0.340643	218.037	2.03476	217.219	5.44858	208.385	60.7481	218.037	2.03476	NA
Spot 87	1234.83	75534.1	1.86289	19.1109	3.26762	0.248225	9.02467	0.0344054	8.41234	0.932149	218.061	18.0373	225.133	18.2247	299.666	74.5227	218.061	18.0373	NA
Spot 64	367.863	140607	2.71349	19.705	2.084	0.243951	2.24029	0.0348641	0.822091	0.366958	220.919	1.78539	221.651	4.46104	229.399	48.164	220.919	1.78539	NA
Spot 39	432.349	73991.5	1.59757	19.7511	1.54428	0.244198	2.26988	0.034981	1.6636	0.732901	221.647	3.62466	221.852	4.52365	224.011	35.7076	221.647	3.62466	NA
Spot 30	885.178	15827	2.8557	19.4606	1.90485	0.249597	2.97698	0.0352285	2.28778	0.768491	223.189	5.01869	226.249	6.03782	258.183	43.7669	223.189	5.01869	NA
Spot 27	864.3	363929	2.31583	19.6135	0.473213	0.25206	0.635727	0.0358557	0.424521	0.667772	227.093	0.947276	228.248	1.29951	240.165	10.9096	227.093	0.947276	NA
Spot 104	533.539	68294.6	2.20432	19.9342	5.16597	0.250124	5.2136	0.0361621	0.703089	0.134857	229	1.58181	226.677	10.5922	202.657	119.998	229	1.58181	NA
Spot 59	742.71	78355.8	2.05289	19.7852	1.28854	0.258026	1.49867	0.0370257	0.765293	0.510647	234.37	1.7614	233.075	3.12113	220.039	29.793	234.37	1.7614	NA
Spot 46	245.393	77144.2	1.46688	18.8381	1.2947	0.294018	5.09493	0.0401706	4.92768	0.967174	253.891	12.2678	261.717	11.755	332.388	29.3414	253.891	12.2678	NA
Spot 51	419.563	50484.7	2.00631	19.4846	1.29595	0.291712	2.70647	0.0412235	2.37603	0.877905	260.412	6.06415	259.906	6.20622	255.346	29.7953	260.412	6.06415	NA
Spot 7	148.691	47445.2	1.47498	18.7377	1.53791	0.455521	2.57082	0.0619048	2.06009	0.801334	387.199	7.74181	381.138	8.16961	344.465	34.7827	387.199	7.74181	NA
Spot 71	96.6507	32219.4	1.07341	18.13	4.53379	0.491418	4.66922	0.0646172	1.11637	0.239092	403.644	4.36799	405.876	15.6228	418.577	101.301	403.644	4.36799	96.4325
Spot 6	35.6403	17293.2	0.830547	13.8399	3.05453	1.67331	3.33339	0.167961	1.33467	0.400396	1000.87	12.373	998.442	21.1888	993.13	62.1111	993.13	62.1111	100.779
Spot 67	45.7496	19218.3	1.25864	13.7909	2.26743	1.60103	2.33559	0.160136	0.560128	0.239822	957.533	4.98409	970.611	14.5986	1000.32	46.0702	1000.32	46.0702	95.7228
Spot 58	643.163	734145	0.898094	13.7349	0.185487	1.69344	0.366586	0.168692	0.316196	0.862542	1004.9	2.94218	1006.06	2.34029	1008.58	3.76293	1008.58	3.76293	99.6355
Spot 13	52.6516	42893.3	1.19894	13.6092	2.47565	1.72276	2.65799	0.170042	0.967509	0.364	1012.34	9.06418	1017.06	17.0781	1027.2	50.0718	1027.2	50.0718	98.5542
Spot 12	78.821	30678.9	1.04296	13.3888	1.14896	1.83867	1.83605	0.178543	1.43212	0.780003	1059.01	13.9861	1059.39	12.076	1060.18	23.1236	1060.18	23.1236	99.8898
Spot 2	115.398	78378.8	1.2925	13.1977	0.674552	1.86606	0.820223	0.178617	0.466632	0.568909	1059.41	4.55871	1069.13	5.42258	1089	13.5171	1089	13.5171	97.283
Spot 23	32.6227	21540.3	1.65187	13.1952	2.93742	1.98948	3.0531	0.190395	0.832467	0.272663	1123.51	8.58321	1111.94	20.6336	1089.37	58.8868	1089.37	58.8868	103.134
Spot 84	61.4696	54774.3	1.87883	12.9418	1.04996	2.05324	1.14721	0.192723	0.462245	0.40293	1136.11	4.81487	1133.37	7.83356	1128.15	20.9345	1128.15	20.9345	100.705
Spot 89	373.53	643087	1.91023	12.9382	0.370295	2.044	0.88866	0.191801	0.807835	0.909049	1131.13	8.38086	1130.3	6.05908	1128.72	7.37589	1128.72	7.37589	100.213
Spot 52	81.4179	83097.2	1.96977	12.9268	1.26449	2.05757	1.42089	0.192905	0.648064	0.456098	1137.09	6.75574	1134.81	9.70913	1130.46	25.165	1130.46	25.165	100.586
Spot 9	88.7485	49810.8	1.98079	12.8027	1.59009	2.12323	1.83924	0.197151	0.924347	0.502571	1160	9.81303	1156.39	12.6965	1149.62	31.5789	1149.62	31.5789	100.902
Spot 110	285.563	420655	1.20843	12.2332	0.880112	2.44973	2.4492	0.217349	2.2856	0.933204	1267.85	26.3065	1257.34	17.6616	1239.41	17.2706	1239.41	17.2706	102.295
Spot 86	61.2516	58890.2	1.58213	11.1569	1.12262	3.09165	1.21691	0.250168	0.469661	0.385947	1439.34	6.05851	1430.62	9.33666	1417.66	21.4634	1417.66	21.4634	101.529
Spot 83	63.2358	54619.8	1.53459	11.0477	1.09398	3.16019	1.31635	0.253211	0.732098	0.556159	1455.01	9.53556	1447.49	10.1535	1436.44	20.8627	1436.44	20.8627	101.293
Spot 96	37.7496	24006.6	1.42693	11.0399	4.68969	3.03565	4.82878	0.243062	1.15061	0.238281	1402.6	14.5034	1416.63	36.8975	1437.77	89.4633	1437.77	89.4633	97.5534
Spot 31	106.271	35121.2	2.56213	10.9524	0.883864	3.12249	1.0301	0.248032	0.529044	0.513586	1428.32	6.77786	1438.25	7.92244	1452.94	16.818	1452.94	16.818	98.3055
Spot 56	128.773	361931	1.31091	10.4999	0.477628	3.51917	0.678529	0.267993	0.481948	0.710283	1530.61	6.56637	1531.53	5.36518	1532.79	8.99173	1532.79	8.99173	99.8579
Spot 111	66.2056	59225.1	0.344279	9.99899	2.2956	3.91901	2.94987	0.284205	1.85256	0.628014	1612.5	26.4296	1617.61	23.8678	1624.25	42.7053	1624.25	42.7053	99.2767
Spot 3	100.953	20756.1	1.9551	9.8762	0.696172	4.01706	0.97484	0.287738	0.682391	0.700003	1630.22	9.82928	1637.65	7.92558	1647.2	12.9122	1647.2	12.9122	98.9687
Spot 101	160.44	276842	2.69401	9.52246	0.96731	4.51436	1.11448	0.311777	0.553508	0.496653	1749.45	8.4806	1733.62	9.26433	1714.56	17.7869	1714.56	17.7869	102.035
Spot 18	145.932	115525	2.05749	9.49161	0.28113	4.4536	1.58653	0.306584	1.56143	0.984175	1723.88	23.6186	1722.37	13.1562	1720.52	5.16594	1720.52	5.16594	100.195
Spot 37	241.825	352807	1.25856	9.34873	0.268589	4.60666	0.718843	0.312347	0.66678	0.927574	1752.25	10.2303	1750.47	5.99723	1748.34	4.91835	1748.34	4.91835	100.223
Spot 109	87.6688	207371	1.90865	9.20658	1.0952	4.82953	1.37657	0.322479	0.833953	0.60582	1801.83	13.1091	1790.06	11.5802	1776.35	19.9842	1776.35	19.9842	101.434
Spot 45	212.704	138476	1.79745	9.17316	0.188247	4.75484	1.24533	0.31634	1.23102	0.988509	1771.83	19.0709	1776.96	10.448	1782.98	3.43055	1782.98	3.43055	99.3746
Spot 50	276.788	153783	0.864421	9.17172	0.155713	4.82508	2.2267	0.320962	2.22124	0.997552	1794.43	34.7922	1789.28	18.7302	1783.27	2.83907	1783.27	2.83907	100.626
Spot 44	189.77	263171	2.85863	9.13826	0.210106	4.89839	0.403732	0.32465	0.344753	0.853916	1812.4	5.44679	1801.98	3.40443	1789.93	3.82765	1789.93	3.82765	101.255
Spot 69	284.214	464155	4.59555	8.95358	0.387233	4.82172	1.48373	0.31311	1.4323	0.965342	1755.99	22.0166	1788.69	12.4783	1827.03	7.02252	1827.03	7.02252	96.1118
Spot 79	102.334	144732	0.766357	8.92688	0.512103	5.05688	0.808942	0.327402	0.626208	0.774108	1825.78	9.95672	1828.9	6.85784	1832.45	9.28093	1832.45	9.28093	99.6359
Spot 17	48.2025	48914.3	1.35975	8.15214	0.769081	6.04579	1.10913	0.357457	0.799181	0.720546	1970.11	13.5663	1982.46	9.66384	1995.36	13.6689	1995.36	13.6689	98.7343
Spot 72	466.42	65975.7	3.01362	6.07311	0.533196	10.0698	1.52555	0.443538	1.42933	0.936932	2366.46	28.3111	2441.2	14.0917	2504.07	8.96992	2504.07	8.96992	94.5044
Spot 75	99.2668	70112.6	0.859747	5.62123	0.247036	11.4879	2.05082	0.468351	2.03588	0.992718	2476.33	41.8619	2563.6	19.1584	2633.35	4.1051	2633.35	4.1051	94.037
Spot 1	95.697	42603.1	0.596246	4.90532	0.2061	15.6265	0.713525	0.555939	0.683111	0.957375	2849.82	15.7342	2854.24	6.80936	2857.34	3.35488	2857.34	3.35488	99.7369
ELM18DVTC-1
Spot 89	1023.77	3282.79	2.15854	14.7188	3.3403	0.0494827	4.07175	0.00564265	0.495604	0.121718	36.2726	0.179264	49.0403	1.94935	728.432	85.6957	36.2726	0.179264	NA
Spot 86	875.113	2845.59	2.01116	13.5347	3.51852	0.0553341	5.1086	0.00582393	0.570958	0.111764	37.4346	0.213116	54.6859	2.71979	896.036	104.829	37.4346	0.213116	NA
Spot 26	1259.29	11481.5	3.25878	18.9867	1.35623	0.0984209	2.39577	0.0139214	0.492016	0.205369	89.1243	0.435488	95.3177	2.17968	253.2	53.9193	89.1243	0.435488	NA
Spot 94	304.286	2713.15	1.52553	14.048	3.86639	0.127066	4.3799	0.0139754	0.526612	0.120234	89.4674	0.467892	121.458	5.01394	804.529	91.075	89.4674	0.467892	NA
Spot 18	632.4	4209.53	2.34006	16.9059	2.75182	0.110664	3.60024	0.0144212	0.622589	0.17293	92.301	0.570561	106.573	3.6424	438.616	78.94	92.301	0.570561	NA
Spot 50	658.138	5382.72	2.65262	17.1885	3.08219	0.111566	4.44098	0.0146449	0.682458	0.153673	93.7225	0.634989	107.397	4.52595	422.402	97.9693	93.7225	0.634989	NA
Spot 47	1299.1	12517.1	3.33603	18.9149	1.42564	0.118776	1.74493	0.0167398	0.727432	0.416883	107.018	0.772061	113.961	1.88102	261.523	36.4362	107.018	0.772061	NA
Spot 13	1897.89	4628.53	2.00927	18.492	1.5112	0.117994	6.2339	0.0168091	0.568602	0.0912112	107.458	0.605943	113.251	6.6806	236.807	143.31	107.458	0.605943	NA
Spot 71	1419.24	12335.2	1.88953	19.0162	1.34242	0.122693	1.5282	0.0173296	0.580604	0.379928	110.757	0.637568	117.51	1.69577	256.529	32.501	110.757	0.637568	NA
Spot 73	5655.87	48468.6	1.70437	20.5594	0.663142	0.116281	1.00491	0.017419	0.603589	0.600642	111.323	0.666166	111.695	1.0629	119.633	18.9233	111.323	0.666166	NA
Spot 43	236.132	3138.8	1.09958	15.6753	2.69305	0.191151	4.24272	0.0235203	0.534027	0.125869	149.866	0.791094	177.611	6.91339	564.973	91.6965	149.866	0.791094	NA
Spot 116	176.175	2262.69	1.00357	12.8441	3.97725	0.239678	4.58886	0.0243304	0.766912	0.167125	154.966	1.17429	218.156	9.00876	970.212	92.3513	154.966	1.17429	NA
Spot 5	147.757	1833.95	1.29426	12.693	4.58486	0.241038	6.51204	0.0246277	0.602438	0.0925115	156.837	0.933443	219.27	12.8431	956.937	132.686	156.837	0.933443	NA
Spot 72	369.173	5501.13	1.45511	16.7859	2.31582	0.193954	4.47877	0.0247346	0.577363	0.128911	157.509	0.898381	179.998	7.38768	486.559	98.0944	157.509	0.898381	NA
Spot 87	524.626	6580.45	1.60714	17.5284	1.98991	0.188469	2.45083	0.0249026	0.611727	0.2496	158.566	0.95816	175.322	3.94637	407.728	53.1024	158.566	0.95816	NA
Spot 79	465.709	6370.12	1.19776	17.0774	2.05099	0.194704	3.02453	0.0251062	0.975138	0.32241	159.847	1.53956	180.635	5.005	462.072	63.4929	159.847	1.53956	NA
Spot 74	229.651	2813.97	1.00328	14.5156	3.69642	0.221553	4.99854	0.025145	0.545349	0.109102	160.091	0.862302	203.201	9.20555	738.413	105.206	160.091	0.862302	NA
Spot 3	1060.68	12733.6	0.968113	18.6565	1.44886	0.182112	1.75753	0.0251801	0.525375	0.298929	160.312	0.831851	169.876	2.74924	305.256	38.2221	160.312	0.831851	NA
Spot 32	330.174	4418.64	1.35416	16.1661	2.87656	0.202783	4.62993	0.0251988	0.54371	0.117434	160.429	0.861504	187.478	7.92605	543.463	100.57	160.429	0.861504	NA
Spot 51	898.075	11161.7	1.33177	19.2429	1.18754	0.175817	1.86665	0.0252717	0.561054	0.300567	160.887	0.891493	164.455	2.8341	216.1	41.2335	160.887	0.891493	NA
Spot 83	467.81	5978.72	1.17067	17.8599	1.63263	0.18705	3.02859	0.0253217	0.598886	0.197744	161.202	0.953444	174.109	4.84578	353.243	67.0671	161.202	0.953444	NA
Spot 44	497.785	7080.71	1.29102	17.401	2.1119	0.192722	3.99571	0.0253399	0.574522	0.143785	161.316	0.915296	178.949	6.55575	418.701	88.3395	161.316	0.915296	NA
Spot 68	402.25	6104.98	1.9771	17.3432	2.19455	0.192756	3.16602	0.0253455	0.534828	0.168928	161.351	0.852241	178.978	5.19522	418.606	69.7104	161.351	0.852241	NA
Spot 10	674.401	9109.88	0.57425	18.8091	1.39173	0.180392	1.89176	0.0253892	0.556207	0.294015	161.626	0.887799	168.397	2.93554	264.625	41.5054	161.626	0.887799	NA
Spot 24	640.149	8334.06	2.02429	17.7554	1.98621	0.190652	2.66889	0.0253967	0.65683	0.246106	161.673	1.04871	177.185	4.3393	389.501	58.0559	161.673	1.04871	NA
Spot 35	805.918	11691.3	0.503056	18.2245	2.05251	0.187363	2.28952	0.0254159	0.541106	0.23634	161.794	0.864581	174.376	3.6684	348.638	50.3046	161.794	0.864581	NA
Spot 25	602.094	9843.16	1.0625	18.1578	2.07374	0.187745	3.20352	0.0254673	0.751148	0.234476	162.117	1.20256	174.703	5.14168	348.671	70.4046	162.117	1.20256	NA
Spot 14	366.123	4541.98	1.42329	16.0713	2.69403	0.207383	3.43188	0.025479	0.795608	0.231829	162.191	1.2743	191.354	5.98542	568.306	72.6836	162.191	1.2743	NA
Spot 60	773.808	12248.9	1.65535	18.3765	1.52821	0.186785	1.94683	0.025503	0.518292	0.266223	162.341	0.830896	173.882	3.11122	333.886	42.5216	162.341	0.830896	NA
Spot 55	253.86	499.025	1.58235	11.5337	4.04419	0.20182	16.062	0.0255059	0.553041	0.0344317	162.36	0.886704	186.665	27.3941	506.46	355.17	162.36	0.886704	NA
Spot 36	986.538	15327.6	1.59572	19.213	1.16522	0.17924	2.22432	0.0255176	0.557117	0.250466	162.434	0.893639	167.406	3.4329	238.279	49.6846	162.434	0.893639	NA
Spot 108	675.187	9571.81	1.5464	18.3935	1.79637	0.186133	2.68412	0.0255668	0.58429	0.217684	162.743	0.938987	173.324	4.27684	320.289	59.5391	162.743	0.938987	NA
Spot 103	600.141	8018.27	1.61972	17.6043	1.88044	0.194051	2.09701	0.0255911	0.543129	0.259001	162.895	0.873645	180.08	3.46039	412.012	45.3121	162.895	0.873645	NA
Spot 80	543.539	7365.26	1.20989	17.5106	1.83428	0.194573	2.21834	0.0256092	0.598333	0.269721	163.009	0.963109	180.524	3.66886	416.44	47.7313	163.009	0.963109	NA
Spot 77	293.431	3992.66	1.14571	15.8358	3.20967	0.211106	4.4897	0.0256695	0.456079	0.101584	163.388	0.735815	194.481	7.94648	590.741	96.8944	163.388	0.735815	NA
Spot 85	209.693	2830.68	1.75881	14.3027	3.23878	0.229816	5.47358	0.0256857	0.62724	0.114594	163.49	1.01258	210.047	10.3862	770.798	114.565	163.49	1.01258	NA
Spot 34	249.871	3583.59	1.26818	13.8944	3.88374	0.240091	4.9781	0.0256955	0.621696	0.124886	163.551	1.004	218.495	9.78655	861.418	102.561	163.551	1.004	NA
Spot 15	605.534	10100.4	1.75044	17.9283	1.67927	0.192711	3.10847	0.0257212	0.625803	0.201322	163.713	1.01162	178.94	5.09978	385.115	68.4364	163.713	1.01162	NA
Spot 98	855.482	11723.4	1.83499	18.6216	1.45828	0.186183	1.97941	0.0257323	0.809317	0.408868	163.783	1.30883	173.367	3.15467	306.181	41.143	163.783	1.30883	NA
Spot 107	923.625	14346.1	1.51088	19.0584	1.35446	0.182744	1.98736	0.0257661	0.625637	0.314808	163.995	1.01307	170.419	3.11789	260.584	43.3366	163.995	1.01307	NA
Spot 62	529.757	8102.62	1.92707	18.3452	1.52304	0.187157	2.76971	0.0257705	0.504048	0.181986	164.023	0.816325	174.2	4.43368	314.686	61.9497	164.023	0.816325	NA
Spot 39	762.278	11004.7	1.90893	18.1602	1.49436	0.191068	2.5766	0.025885	0.599475	0.232662	164.742	0.975077	177.54	4.19691	351.531	56.6197	164.742	0.975077	NA
Spot 113	184.01	2872.53	1.28969	15.0327	3.84718	0.21944	6.43622	0.0259231	0.586076	0.091059	164.982	0.954652	201.444	11.7608	653.052	137.678	164.982	0.954652	NA
Spot 102	790.51	3060.88	1.58483	17.1847	1.64183	0.190954	6.34949	0.0259447	0.558945	0.0880299	165.117	0.911197	177.443	10.3375	344.977	143.199	165.117	0.911197	NA
Spot 57	852.747	8519.43	2.17928	18.4665	1.75486	0.187106	2.47102	0.0259451	0.822851	0.333001	165.12	1.34144	174.157	3.95463	298.684	53.1667	165.12	1.34144	NA
Spot 64	776.541	7683.06	0.988114	18.4474	1.58401	0.187217	2.79898	0.0259864	0.622817	0.222516	165.379	1.01691	174.252	4.48176	296.439	62.2621	165.379	1.01691	NA
Spot 109	398.839	6445.83	0.865532	16.4646	2.3965	0.209402	4.32536	0.0260154	0.528267	0.122132	165.562	0.863472	193.051	7.6045	543.989	93.8891	165.562	0.863472	NA
Spot 118	1409.59	19168.7	1.46813	19.1971	1.04037	0.184013	1.58892	0.0260349	0.540976	0.340469	165.684	0.884893	171.508	2.5074	252.622	34.3606	165.684	0.884893	NA
Spot 104	394.484	5997.89	1.49361	15.7924	2.72819	0.218607	4.35981	0.0260367	0.579494	0.132917	165.696	0.947961	200.75	7.94158	635.522	93.0603	165.696	0.947961	NA
Spot 1	651.874	10516.6	1.48783	18.2837	1.48035	0.191567	1.98441	0.026052	0.480496	0.242135	165.792	0.786466	177.966	3.23941	342.915	43.5797	165.792	0.786466	NA
Spot 6	1362.59	21015.4	1.99532	19.517	0.882078	0.182121	1.42774	0.0261338	0.460287	0.322388	166.306	0.755693	169.884	2.23347	220.011	31.2947	166.306	0.755693	NA
Spot 90	1004.06	16962.8	2.27232	19.2127	1.33546	0.184973	2.07113	0.0261819	0.697104	0.336581	166.608	1.14655	172.331	3.28277	251.647	44.8907	166.608	1.14655	NA
Spot 100	1098.71	14567.4	0.971012	19.5747	1.21765	0.181553	1.8744	0.0263085	0.533684	0.284723	167.403	0.881903	169.396	2.92445	197.325	41.7619	167.403	0.881903	NA
Spot 67	913.304	13623.9	1.38099	18.9135	1.23682	0.188542	1.87136	0.0264251	0.52854	0.282436	168.136	0.877175	175.385	3.01428	274.253	41.1115	168.136	0.877175	NA
Spot 40	667.043	2100.61	1.49179	16.4545	2.32699	0.197375	8.03114	0.0267031	0.591729	0.0736794	169.881	0.992105	182.902	13.4429	354.592	181.173	169.881	0.992105	NA
Spot 37	704.938	9607.14	1.16545	18.7662	1.42719	0.191498	2.69816	0.0269098	0.652294	0.241755	171.179	1.10189	177.907	4.40324	268.252	60.0436	171.179	1.10189	NA
Spot 112	1544.95	22507.5	0.640889	19.3281	0.927626	0.189392	1.40381	0.0269246	0.674694	0.480618	171.272	1.14034	176.111	2.26974	241.573	28.3507	171.272	1.14034	NA
Spot 84	514.987	7613.87	1.78301	18.4685	1.60488	0.194142	2.03056	0.0269336	0.49923	0.245858	171.328	0.844055	180.157	3.35205	297.599	44.9096	171.328	0.844055	NA
Spot 23	349.79	5919.68	1.69909	16.1386	2.25535	0.221384	4.43011	0.0270271	0.604457	0.136443	171.915	1.02542	203.061	8.15357	582.073	95.3258	171.915	1.02542	NA
Spot 91	221.46	3640.08	1.68346	14.9659	3.09742	0.234474	3.82061	0.0270299	0.470476	0.123142	171.932	0.798208	213.886	7.36857	705.317	80.6967	171.932	0.798208	NA
Spot 59	248.853	3417.99	1.22621	14.6421	3.18617	0.238482	4.95125	0.0270477	0.606459	0.122486	172.044	1.02958	217.177	9.6811	739.883	104.002	172.044	1.02958	NA
Spot 28	299.807	3712.8	2.30894	16.0258	3.00647	0.217899	3.46458	0.0270967	0.638099	0.184178	172.352	1.0852	200.16	6.29405	541.92	74.4583	172.352	1.0852	NA
Spot 38	657.275	10350	1.51411	18.0646	1.89039	0.201202	2.41596	0.0271415	0.520956	0.215631	172.633	0.887406	186.143	4.10903	361.191	53.2274	172.633	0.887406	NA
Spot 48	228.746	3765.69	1.93952	14.7061	3.69114	0.239287	5.17783	0.0271707	0.695114	0.134248	172.816	1.18531	217.836	10.1517	737.445	108.654	172.816	1.18531	NA
Spot 52	580.081	9458.87	1.48607	18.3164	1.59521	0.198163	2.89425	0.027197	0.697107	0.240859	172.981	1.18983	183.571	4.86045	322.158	63.8061	172.981	1.18983	NA
Spot 7	380.284	6201.89	0.979342	16.4269	2.93084	0.219781	3.62074	0.0272312	0.578521	0.15978	173.196	0.988636	201.727	6.62431	549.88	78.0646	173.196	0.988636	NA
Spot 95	496.518	7695.77	1.98382	18.3229	1.79347	0.198262	2.09964	0.0272693	0.560115	0.266767	173.435	0.958486	183.655	3.52748	317.206	46.0124	173.435	0.958486	NA
Spot 17	838.802	13041.8	1.32656	18.6679	1.23792	0.19738	1.88927	0.0272918	0.546469	0.289248	173.577	0.935886	182.907	3.16225	305.199	41.2051	173.577	0.935886	NA
Spot 88	850.694	12662.2	1.37573	18.2199	1.40478	0.202425	1.80728	0.0273131	0.618203	0.342062	173.71	1.05954	187.176	3.08932	360.634	38.2964	173.71	1.05954	NA
Spot 82	797.867	15650.2	1.25518	18.9065	1.29828	0.195757	2.16656	0.0273371	0.594703	0.274491	173.86	1.02013	181.529	3.60145	282.588	47.645	173.86	1.02013	NA
Spot 54	385.082	5779.02	1.50743	16.9108	2.33912	0.213139	3.02722	0.0273979	0.580894	0.19189	174.242	0.998603	196.183	5.40045	469.007	65.8022	174.242	0.998603	NA
Spot 114	592.65	9476.99	1.69087	18.4556	1.64887	0.198727	2.91504	0.0274156	0.516733	0.177264	174.353	0.888866	184.049	4.90699	310.405	65.3092	174.353	0.888866	NA
Spot 12	594.472	9872.1	1.15134	18.7941	1.56743	0.195499	2.35743	0.0274228	0.59127	0.250811	174.398	1.01734	181.31	3.91441	272.355	52.307	174.398	1.01734	NA
Spot 75	122.88	2463.66	1.27365	12.0066	5.31731	0.293881	6.79579	0.0274297	0.52437	0.0771611	174.441	0.902454	261.61	15.6741	1139.34	134.907	174.441	0.902454	NA
Spot 120	173.025	3155.47	1.35012	13.3138	4.48354	0.266798	5.24519	0.0274403	0.510842	0.0973926	174.508	0.879502	240.13	11.2172	943.46	107.027	174.508	0.879502	NA
Spot 61	238.054	3866.78	1.68082	15.877	2.49812	0.22372	3.83435	0.0274489	0.568225	0.148193	174.562	0.978597	205.001	7.1179	571.222	82.5133	174.562	0.978597	NA
Spot 81	423.632	6824.67	1.45624	17.6025	1.81013	0.206922	2.52723	0.0274618	0.569005	0.22515	174.643	0.980388	190.967	4.39951	397.838	55.1876	174.643	0.980388	NA
Spot 93	357.696	5590.95	2.2381	16.4576	2.62658	0.220324	3.09854	0.0274674	0.584159	0.188527	174.678	1.0067	202.179	5.68039	536.394	66.5877	174.678	1.0067	NA
Spot 30	1071.98	17437.8	1.14691	19.0808	1.06605	0.195574	1.43233	0.0276016	0.57955	0.404621	175.52	1.0035	181.374	2.37908	258.343	30.0967	175.52	1.0035	NA
Spot 96	682.906	9862.42	1.78038	18.6263	1.37281	0.198931	2.39759	0.0276086	0.519093	0.216506	175.564	0.899043	184.221	4.03939	296.76	53.4288	175.564	0.899043	NA
Spot 111	235.704	3103.67	1.15258	15.3186	3.09997	0.230485	4.30576	0.027619	0.52349	0.121579	175.629	0.906988	210.599	8.18947	622.37	92.2067	175.629	0.906988	NA
Spot 11	1510.68	25219.7	2.06493	19.598	0.908931	0.192254	1.38225	0.0276399	0.521689	0.37742	175.76	0.904534	178.551	2.2632	215.672	29.6607	175.76	0.904534	NA
Spot 115	813.327	14522.1	1.15675	18.9215	1.56685	0.197316	2.04171	0.0276401	0.906698	0.444087	175.761	1.57209	182.852	3.41648	275.471	41.8859	175.761	1.57209	NA
Spot 16	498.214	8768.34	0.955996	18.3757	1.78707	0.20189	3.38426	0.027754	0.585898	0.173124	176.476	1.01995	186.724	5.77229	318.374	75.7639	176.476	1.01995	NA
Spot 76	454.807	7472.57	2.45575	17.3325	1.88554	0.214493	2.64388	0.0278442	0.491993	0.186087	177.042	0.859182	197.316	4.74126	447.18	57.7395	177.042	0.859182	NA
Spot 46	255.926	3978.87	1.57882	14.1731	3.08401	0.256646	4.83645	0.0279333	0.651359	0.134677	177.601	1.14103	231.961	10.0298	826.419	100.045	177.601	1.14103	NA
Spot 119	756.808	13414.9	1.46274	18.9133	1.27734	0.199393	1.7741	0.0279506	0.483005	0.272254	177.709	0.846621	184.613	2.99474	273.871	39.1044	177.709	0.846621	NA
Spot 97	468.396	8088.14	1.60164	17.3915	2.02022	0.214902	2.41453	0.0279541	0.502828	0.208251	177.731	0.881474	197.658	4.33674	442.65	52.5403	177.731	0.881474	NA
Spot 92	874.104	12439.1	2.15032	18.7097	1.43096	0.202115	2.31001	0.0280135	1.01189	0.438046	178.104	1.77755	186.914	3.94366	299.722	47.3517	178.104	1.77755	NA
Spot 56	831.115	13361.2	1.25988	18.82	1.27263	0.200778	2.02865	0.028048	0.472439	0.232883	178.32	0.830907	185.784	3.44423	281.795	45.1382	178.32	0.830907	NA
Spot 101	608.904	10512.4	2.63587	18.063	1.61263	0.210009	3.03205	0.0282367	0.706806	0.233111	179.503	1.25124	193.56	5.34343	368.582	66.4271	179.503	1.25124	NA
Spot 42	2051.68	18282.6	2.09303	19.3284	0.785686	0.229334	1.09707	0.0327777	0.578968	0.527742	207.91	1.18453	209.648	2.07807	229.212	21.5107	207.91	1.18453	NA
Spot 4	2430.76	50481.5	3.39866	19.6152	0.722529	0.231726	1.05032	0.0331524	0.600472	0.571704	210.248	1.24211	211.623	2.00638	226.946	19.9231	210.248	1.24211	NA
Spot 106	680.26	13588.9	2.54479	18.7182	1.25831	0.239661	1.56166	0.0332112	0.519675	0.33277	210.615	1.07683	218.143	3.06559	300.2	33.5954	210.615	1.07683	NA
Spot 9	2232.46	37515.9	2.72448	19.5898	0.72025	0.232002	1.15506	0.0332329	0.561984	0.486542	210.75	1.16523	211.85	2.20859	224.103	23.3255	210.75	1.16523	NA
Spot 20	2618.26	58129.5	3.45751	19.7331	0.742911	0.232312	0.950502	0.0334482	0.549345	0.577953	212.094	1.14617	212.106	1.81943	212.218	17.9509	212.094	1.14617	NA
Spot 69	2742.57	42845.1	2.72792	19.5345	0.651643	0.234733	0.836819	0.0335117	0.500359	0.59793	212.49	1.04588	214.099	1.61534	231.813	15.4829	212.49	1.04588	NA
Spot 53	1902.99	41188.7	2.47602	19.7253	0.97665	0.231879	1.38011	0.0335362	0.850784	0.616461	212.642	1.77962	211.749	2.63778	201.814	25.2294	212.642	1.77962	NA
Spot 22	2264.96	4174.53	2.60263	18.5315	1.55313	0.237213	6.39404	0.0341399	0.565369	0.0884211	216.407	1.20319	216.135	12.4486	213.161	147.66	216.407	1.20319	NA
Spot 8	814.767	12749	4.10236	19.0864	1.06682	0.241859	1.95624	0.0342481	0.582068	0.297544	217.081	1.24252	219.942	3.86852	250.644	42.9745	217.081	1.24252	NA
Spot 41	1883.8	8852.57	3.96428	18.9697	0.816871	0.240502	1.70564	0.0342908	0.650472	0.381364	217.347	1.39021	218.831	3.35769	234.85	36.3863	217.347	1.39021	NA
Spot 29	2044.34	42141.4	3.03988	19.5979	0.724109	0.240883	0.983468	0.034593	0.557456	0.566826	219.23	1.20156	219.143	1.9385	218.207	18.7613	219.23	1.20156	NA
Spot 105	2112.12	43762.8	3.65436	19.5488	0.824231	0.245879	1.09112	0.0350967	0.63137	0.578644	222.368	1.38003	223.223	2.1865	232.225	20.5672	222.368	1.38003	NA
Spot 78	2023.65	39833.8	3.93835	19.6328	0.733513	0.247355	1.06766	0.0354041	0.583184	0.546228	224.282	1.28549	224.425	2.14977	225.914	20.6577	224.282	1.28549	NA
Spot 33	3158.96	47364.1	2.68642	19.5942	0.625579	0.247374	1.01741	0.0354792	0.546248	0.536899	224.75	1.20654	224.441	2.04873	221.184	19.8685	224.75	1.20654	NA
Spot 66	2073.54	42973.9	1.87724	19.4072	1.06611	0.250367	1.55069	0.0355083	0.956213	0.616637	224.931	2.11373	226.874	3.1528	247.067	28.1013	224.931	2.11373	NA
Spot 110	945.485	20895.9	2.41056	19.0066	1.12259	0.255392	1.487	0.0357436	0.596128	0.400894	226.396	1.32618	230.947	3.07164	277.553	31.2129	226.396	1.32618	NA
Spot 117	1300.69	24712.9	2.75833	19.3198	0.950338	0.252435	1.3812	0.0358265	0.651562	0.471738	226.911	1.45275	228.553	2.82671	245.466	28.0276	226.911	1.45275	NA
Spot 21	1503.87	27372.4	2.71722	19.3548	0.753573	0.252457	1.24834	0.035846	0.50572	0.405115	227.033	1.12817	228.57	2.55498	244.4	26.2812	227.033	1.12817	NA
Spot 45	1901.7	49244.4	1.98065	19.5906	0.759085	0.249948	1.03946	0.0358855	0.553262	0.532262	227.279	1.23554	226.534	2.11054	218.796	20.3658	227.279	1.23554	NA
Spot 27	1286.59	23508	2.81695	19.2987	0.873622	0.252863	1.21897	0.0359039	0.643182	0.527645	227.394	1.43706	228.899	2.49807	244.388	23.8488	227.394	1.43706	NA
Spot 49	624.097	12345	2.99984	18.3153	1.2031	0.264694	1.94361	0.036111	0.580326	0.298582	228.682	1.30384	238.443	4.13047	335.726	42.0305	228.682	1.30384	NA
Spot 70	742.7	14883.3	1.86928	18.7409	1.11746	0.276028	1.64667	0.0382587	0.57288	0.347903	242.03	1.36084	247.502	3.61685	299.687	35.2021	242.03	1.36084	NA
Spot 99	4135.09	87315.9	1.85969	19.3489	0.617987	0.276337	0.863521	0.0389262	0.575781	0.666783	246.174	1.3907	247.748	1.89835	262.691	14.777	246.174	1.3907	NA
Spot 65	1191.72	25076.7	3.30212	19.2575	0.930871	0.278474	1.13898	0.0393737	0.569866	0.500328	248.95	1.39164	249.447	2.51908	254.121	22.6999	248.95	1.39164	NA
Spot 31	979.221	26012.1	2.27593	19.1436	1.0091	0.300961	1.26267	0.0423879	0.644112	0.510117	267.617	1.68847	267.151	2.96598	263.07	24.921	267.617	1.68847	NA
Spot 19	151.125	16392.7	1.64144	12.9355	1.13111	1.98625	1.47365	0.188641	0.651991	0.442433	1114.01	6.67029	1110.85	9.95282	1104.69	26.4349	1104.69	26.4349	100.844
Spot 63	372.947	60621.4	1.87608	9.20211	0.637091	4.68388	0.901882	0.313539	0.623283	0.691091	1758.1	9.59075	1764.36	7.54655	1771.77	11.9001	1771.77	11.9001	99.2281
Spot 2	376.978	89284.4	1.65443	7.70766	0.601062	6.81609	0.833637	0.381251	0.576451	0.691489	2082.13	10.257	2087.82	7.38177	2093.42	10.5852	2093.42	10.5852	99.4607
ELM18DVTC-2
Spot 111	147.225	63.3639	0.97056	3.89035	14.9948	0.00776709	247.899	0.00402051	0.50558	0.00203946	25.8659	0.130511	7.8561	19.4024	NA	NA	25.8659	0.130511	NA
Spot 63	98.8323	279.844	0.762924	4.47376	19.2788	0.118132	23.9502	0.0047663	0.485653	0.0202776	30.6525	0.148512	113.377	25.6984	2650.61	403.726	30.6525	0.148512	NA
Spot 81	796.714	365.295	0.51966	8.9363	7.78768	0.0483371	36.4151	0.00481314	0.536481	0.0147324	30.9531	0.165659	47.9313	17.0503	1009.4	763.534	30.9531	0.165659	NA
Spot 38	361.656	255.22	0.521455	6.25492	8.10174	0.0711598	16.4902	0.00486662	0.663536	0.0402382	31.2961	0.207158	69.7995	11.1238	1732.56	304.422	31.2961	0.207158	NA
Spot 23	138.119	440.665	1.04027	5.33436	14.9978	0.108174	19.187	0.00495952	0.501346	0.0261294	31.8921	0.159495	104.294	19.0197	2436.4	328.261	31.8921	0.159495	NA
Spot 82	283.545	1003.52	1.01814	8.25662	8.5167	0.0757812	9.60126	0.00510642	0.641243	0.0667874	32.8344	0.210013	74.1707	6.86755	1759.7	175.573	32.8344	0.210013	NA
Spot 16	126.476	394.831	0.898638	4.24749	18.5668	0.145589	21.1206	0.00515125	0.855022	0.0404828	33.1218	0.282473	138.009	27.2609	2866.26	347.601	33.1218	0.282473	NA
Spot 18	325.58	393.675	1.16864	7.22619	9.27979	0.0734019	23.3911	0.00515524	0.624716	0.0267074	33.1475	0.206546	71.9226	16.2429	1683.62	437.853	33.1475	0.206546	NA
Spot 68	477.081	500.098	1.14092	9.90397	6.54924	0.05178	27.6471	0.00518236	0.516801	0.0186928	33.3214	0.171761	51.2606	13.8212	999.036	572.056	33.3214	0.171761	NA
Spot 28	462.183	1515.78	1.00878	10.6225	6.54858	0.0607618	9.12	0.005212	0.958792	0.105131	33.5115	0.320472	59.8948	5.30447	1305.27	176.479	33.5115	0.320472	NA
Spot 118	231	762.522	1.57295	5.84024	11.9985	0.111613	12.3555	0.00524148	0.605379	0.0489966	33.7005	0.203484	107.44	12.5973	2395.67	210.813	33.7005	0.203484	NA
Spot 53	217.653	635.246	0.969794	7.47715	10.5324	0.08156	17.2417	0.00526562	0.702483	0.0407432	33.8553	0.237204	79.6106	13.2027	1837.56	314.424	33.8553	0.237204	NA
Spot 119	247.736	715.584	0.775688	8.2017	8.39237	0.0746478	10.752	0.00527984	0.519796	0.048344	33.9465	0.175989	73.1004	7.58367	1670.59	199.164	33.9465	0.175989	NA
Spot 113	418.419	1370.93	0.850203	10.6132	7.88638	0.0610711	9.24502	0.00528813	0.887905	0.0960414	33.9997	0.30109	60.1908	5.40298	1286.95	179.537	33.9997	0.30109	NA
Spot 21	433.164	1600.81	1.42079	9.92467	7.39714	0.0670667	9.70718	0.0053003	0.742706	0.076511	34.0777	0.252429	65.912	6.19503	1462.63	184.349	34.0777	0.252429	NA
Spot 95	194.425	552.112	0.485623	5.67999	11.2644	0.11203	15.4608	0.00530871	0.525388	0.0339819	34.1316	0.17885	107.821	15.8167	2380.32	265.008	34.1316	0.17885	NA
Spot 107	335.267	1061.86	0.931112	9.65562	7.69994	0.0662226	9.5804	0.00531359	0.612024	0.063883	34.1629	0.208532	65.1086	6.04195	1433.75	182.787	34.1629	0.208532	NA
Spot 11	493.337	1404.09	0.800112	11.1844	6.25726	0.0580914	7.55961	0.0053246	0.465527	0.0615808	34.2335	0.158944	57.3354	4.21425	1175.33	149.486	34.2335	0.158944	NA
Spot 71	607.638	2101.98	1.50547	11.4135	6.54981	0.059499	10.5561	0.00532984	0.653976	0.0619524	34.2671	0.223504	58.6853	6.01932	1220.6	207.643	34.2671	0.223504	NA
Spot 36	522.294	1600.17	0.558603	11.5412	6.68288	0.0570804	8.56601	0.00533962	0.599001	0.0699276	34.3298	0.20509	56.3647	4.69668	1134.86	170.358	34.3298	0.20509	NA
Spot 110	217.815	682.262	1.03485	5.9046	12.6426	0.110883	15.158	0.00534363	0.584806	0.0385808	34.3555	0.200379	106.773	15.3639	2351.56	260.479	34.3555	0.200379	NA
Spot 114	568.031	1752.63	0.722593	10.9388	5.92725	0.0614594	6.96299	0.00534774	0.62241	0.0893883	34.3819	0.213427	60.5623	4.09367	1277.46	135.345	34.3819	0.213427	NA
Spot 24	384.979	1197.31	0.699168	10.517	7.14482	0.0612807	8.06601	0.00535153	0.639397	0.0792706	34.4062	0.219406	60.3913	4.72917	1270.41	157.145	34.4062	0.219406	NA
Spot 50	374.545	625.613	0.794009	8.68806	8.34128	0.0684904	19.8165	0.00535309	0.521437	0.0263132	34.4162	0.17898	67.2659	12.8985	1483.69	379.107	34.4162	0.17898	NA
Spot 74	692.817	2183.78	1.9181	11.1066	7.76625	0.0617813	8.62467	0.00535324	0.591324	0.068562	34.4172	0.202975	60.8702	5.09563	1285.63	167.858	34.4172	0.202975	NA
Spot 98	743.147	2267.71	0.656221	12.9289	4.35944	0.0524881	5.54668	0.00535512	0.701134	0.126406	34.4292	0.240751	51.9439	2.80871	959.936	112.509	34.4292	0.240751	NA
Spot 104	609.387	1801.03	0.716646	12.2058	5.34702	0.054667	9.12639	0.00535906	0.599487	0.0656872	34.4545	0.205999	54.0439	4.80333	1041	184.157	34.4545	0.205999	NA
Spot 44	310.21	798.708	0.676869	8.49042	11.3864	0.074268	13.5451	0.00536635	0.579588	0.0427893	34.5012	0.199431	72.7415	9.50857	1631.01	252.679	34.5012	0.199431	NA
Spot 70	405.874	1186.45	2.68076	10.4815	7.1233	0.0621093	8.8607	0.00538791	0.713103	0.0804792	34.6395	0.246352	61.1838	5.26126	1283.37	172.352	34.6395	0.246352	NA
Spot 19	371.412	1306.51	0.459738	10.5402	6.51857	0.0622806	8.1462	0.00538795	0.606612	0.0744657	34.6398	0.209565	61.3475	4.84955	1288.72	158.379	34.6398	0.209565	NA
Spot 55	560.173	1846.74	0.970919	11.3496	6.6991	0.0599714	8.75343	0.00538908	0.634326	0.072466	34.647	0.219185	59.1379	5.02877	1214.38	172.05	34.647	0.219185	NA
Spot 48	222.351	666.505	0.616991	7.20785	12.1385	0.0881085	13.6982	0.00538982	0.565245	0.0412641	34.6517	0.195342	85.7398	11.2631	1934.63	246.204	34.6517	0.195342	NA
Spot 41	701.31	1969.53	1.32478	13.1262	3.65906	0.0511982	7.18585	0.0054	0.543357	0.0756149	34.717	0.18813	50.6988	3.55369	891.665	148.148	34.717	0.18813	NA
Spot 96	945.21	2827.36	0.592741	12.5064	4.52556	0.0558643	6.15342	0.0054018	0.515202	0.0837262	34.7285	0.178441	55.1959	3.30578	1068.68	123.355	34.7285	0.178441	NA
Spot 26	347.492	1124.37	1.12142	10.1601	9.04455	0.0639171	10.9506	0.00541161	0.54766	0.0500117	34.7914	0.190026	62.9106	6.68013	1330.56	212.261	34.7914	0.190026	NA
Spot 79	2109.19	2290.16	0.367177	16.3726	2.09805	0.0408925	6.28682	0.00541731	0.522149	0.0830546	34.828	0.181364	40.6951	2.50784	401.874	140.44	34.828	0.181364	NA
Spot 120	183.431	546.563	1.32075	5.34593	15.0581	0.122362	18.676	0.00542048	0.720471	0.0385775	34.8483	0.250395	117.211	20.6769	2494.46	317.365	34.8483	0.250395	NA
Spot 33	514.459	1939.6	1.5762	11.0174	5.13478	0.0622924	8.85395	0.00542437	0.563051	0.0635931	34.8732	0.195824	61.3588	5.27183	1275.96	172.632	34.8732	0.195824	NA
Spot 22	715.846	1996.49	0.530065	12.5296	4.91244	0.0542168	9.85371	0.00542925	0.633554	0.064296	34.9045	0.220541	53.6103	5.14562	997.909	200.222	34.9045	0.220541	NA
Spot 73	322.634	920.663	0.575045	8.33118	9.07735	0.0787507	10.072	0.00543005	0.536691	0.0532853	34.9097	0.186851	76.9697	7.46601	1717.51	185.351	34.9097	0.186851	NA
Spot 31	1322.81	4264.22	0.487759	16.9869	3.11018	0.0413806	4.36808	0.00543009	0.817868	0.187237	34.9099	0.284745	41.1711	1.76242	423.139	95.7697	34.9099	0.284745	NA
Spot 66	530.772	1744.01	0.842971	10.2021	6.75333	0.0674822	8.89632	0.00543206	0.588259	0.0661239	34.9225	0.20488	66.3074	5.71049	1427.63	169.805	34.9225	0.20488	NA
Spot 87	565.774	1958.94	0.90627	12.2872	5.13296	0.0556568	7.60281	0.00544157	0.492009	0.0647142	34.9835	0.171656	54.9963	4.07007	1046.41	153.207	34.9835	0.171656	NA
Spot 94	338.842	423.68	0.854917	7.75015	8.41617	0.0724644	23.8143	0.00544992	1.05798	0.0444265	35.037	0.369681	71.0354	16.3398	1556.24	453.041	35.037	0.369681	NA
Spot 58	894.119	2613.98	2.01741	14.2573	4.67838	0.0487963	7.94315	0.00545194	0.663754	0.083563	35.05	0.232015	48.376	3.7525	771.509	166.852	35.05	0.232015	NA
Spot 27	1450.58	4601.36	1.35281	16.563	2.56546	0.0429045	4.64025	0.00545631	0.69788	0.150397	35.078	0.244137	42.6559	1.93834	492.69	101.216	35.078	0.244137	NA
Spot 7	269.023	697.691	0.7891	6.80632	10.4929	0.0961033	16.6958	0.00546178	0.583499	0.0349488	35.1131	0.204327	93.173	14.8647	2065.37	296.384	35.1131	0.204327	NA
Spot 72	1031.58	3110.88	2.14011	15.7768	3.49287	0.0442636	8.62345	0.00546332	0.441734	0.0512247	35.123	0.154728	43.9782	3.7115	558.238	188.09	35.123	0.154728	NA
Spot 109	5894.12	2070.19	0.524739	18.3187	1.16465	0.0357588	1.42999	0.00546666	0.499816	0.349524	35.1444	0.175179	35.6748	0.501288	71.49	31.8528	35.1444	0.175179	NA
Spot 6	514.556	1914.92	0.512154	11.0212	6.36238	0.0627705	7.06042	0.00547303	0.995367	0.140978	35.1852	0.349268	61.8157	4.23428	1273.46	136.514	35.1852	0.349268	NA
Spot 1	3101.58	9973.89	3.4464	19.1191	1.44848	0.0382681	2.14077	0.00547566	0.581377	0.271574	35.2021	0.204099	38.1317	0.801174	226.627	47.6187	35.2021	0.204099	NA
Spot 37	687.099	1829.6	0.377892	12.322	5.56395	0.0552422	7.51704	0.00547925	0.525103	0.069855	35.2251	0.184464	54.5975	3.99575	1017.32	152.089	35.2251	0.184464	NA
Spot 90	1089.36	3523.48	0.558909	15.9478	2.82191	0.0444665	7.36452	0.00550007	0.675231	0.091687	35.3586	0.238098	44.1755	3.18357	553.624	160.217	35.3586	0.238098	NA
Spot 100	3042.05	8589.57	0.422309	18.8876	1.58748	0.0389231	2.35452	0.00550012	0.616526	0.261847	35.3589	0.2174	38.7721	0.895688	255.481	52.2359	35.3589	0.2174	NA
Spot 39	383.312	1427.9	0.680921	9.29281	7.68712	0.074199	10.2936	0.00550523	0.578123	0.0561636	35.3917	0.204047	72.6763	7.21964	1581.64	192.741	35.3917	0.204047	NA
Spot 84	6347.97	10244.4	1.18673	19.5374	0.973017	0.0378059	1.32621	0.00550576	0.594852	0.448536	35.395	0.209971	37.6796	0.490551	185.707	27.6076	35.395	0.209971	NA
Spot 3	944.8	2671.13	0.860236	13.4598	3.5827	0.0522822	4.70212	0.00551473	0.592139	0.12593	35.4526	0.209352	51.7452	2.37217	891.53	96.3829	35.4526	0.209352	NA
Spot 83	506.345	1513.39	1.29719	12.7757	4.74711	0.0524057	9.97539	0.00551668	0.582195	0.0583631	35.4651	0.205909	51.8644	5.04381	895.633	206.003	35.4651	0.205909	NA
Spot 34	427.172	1468.11	1.13965	10.6035	5.72172	0.0642756	12.5477	0.00551928	0.644272	0.0513458	35.4817	0.227971	63.2527	7.69476	1303.2	244.343	35.4817	0.227971	NA
Spot 59	1284.09	4533.95	2.37921	15.5995	3.66912	0.0465699	4.64165	0.00552009	0.536645	0.115615	35.487	0.189916	46.2183	2.0972	645.826	99.0885	35.487	0.189916	NA
Spot 17	640.629	1906.6	1.92253	12.3639	4.72921	0.055799	6.33951	0.00552859	0.579981	0.0914867	35.5414	0.205566	55.1331	3.40199	1019.47	127.927	35.5414	0.205566	NA
Spot 78	518.903	1915.88	0.916383	10.5608	6.33207	0.0667831	8.14095	0.00553408	0.588856	0.0723325	35.5766	0.208918	65.6422	5.17487	1372.01	156.457	35.5766	0.208918	NA
Spot 112	2573.1	8502.62	3.13333	18.5145	1.73782	0.0398092	3.54499	0.00553428	0.684721	0.193151	35.5779	0.242938	39.6378	1.37808	292.874	79.4263	35.5779	0.242938	NA
Spot 9	1542.51	4572.13	1.74877	16.1243	3.00739	0.0448658	3.73366	0.0055422	0.547048	0.146518	35.6287	0.194368	44.5636	1.62787	556.478	80.5946	35.6287	0.194368	NA
Spot 108	1848.53	4518.43	2.75315	17.2624	2.61413	0.0418765	3.04789	0.00554922	0.62643	0.205529	35.6737	0.222854	41.6545	1.2439	401.25	66.8428	35.6737	0.222854	NA
Spot 80	834.911	2620.67	1.06356	14.8321	3.7173	0.0474516	4.8236	0.00555477	0.606818	0.125802	35.7092	0.216091	47.0734	2.2188	672.591	102.415	35.7092	0.216091	NA
Spot 91	1379.69	4158.77	1.96543	15.9525	2.82844	0.0453947	4.08787	0.00555646	0.5972	0.146091	35.7201	0.21273	45.0775	1.8024	576.364	87.9364	35.7201	0.21273	NA
Spot 116	2491.85	8491.33	2.05941	17.5394	2.50643	0.042363	3.75608	0.00555811	0.618975	0.164793	35.7307	0.220552	42.1285	1.55	423.497	82.6769	35.7307	0.220552	NA
Spot 106	2675.34	9251.36	2.6813	19.0029	1.62926	0.0391483	2.32144	0.00556487	0.614606	0.264752	35.774	0.21926	38.9921	0.888021	241.821	51.5804	35.774	0.21926	NA
Spot 10	3593.48	12399.5	2.08596	18.7352	1.80335	0.0400201	2.49258	0.00557278	0.562025	0.22548	35.8247	0.200786	39.8437	0.973902	289.126	55.4805	35.8247	0.200786	NA
Spot 76	924.869	3083.39	1.3501	13.9984	3.8758	0.0514484	4.43509	0.00558089	0.569936	0.128506	35.8767	0.203906	50.9403	2.20352	833.421	91.713	35.8767	0.203906	NA
Spot 32	1834.71	1552.23	5.78987	13.0898	4.40385	0.0515366	12.096	0.00558631	0.622408	0.0514555	35.9114	0.222894	51.0256	6.01962	834.964	252.58	35.9114	0.222894	NA
Spot 25	541.717	664.029	0.65904	9.65043	6.56661	0.0632513	22.4189	0.00558715	0.611055	0.0272562	35.9168	0.218862	62.275	13.5427	1248.08	444.275	35.9168	0.218862	NA
Spot 46	296.246	929.777	0.551961	9.18611	7.41536	0.0726316	8.58606	0.00560994	0.591247	0.0688613	36.063	0.212626	71.1937	5.90342	1506.09	162.117	36.063	0.212626	NA
Spot 93	798.451	399.132	2.39544	9.82098	4.4206	0.0510066	13.9178	0.00562494	0.630715	0.0453172	36.1591	0.227422	50.5137	6.85848	798.947	292.701	36.1591	0.227422	NA
Spot 43	360.2	1094.52	1.15437	9.10515	8.32157	0.0752635	12.6379	0.00562701	0.58634	0.0463952	36.1723	0.211499	73.6821	8.98229	1567.35	237.527	36.1723	0.211499	NA
Spot 64	499.535	1535.91	0.64081	10.3986	6.75209	0.0675979	7.55455	0.00562729	0.51306	0.067914	36.1741	0.185075	66.4174	4.85699	1363.2	145.389	36.1741	0.185075	NA
Spot 52	417.18	1326.26	0.814051	10.3308	7.74722	0.0669284	11.3214	0.00563383	0.542527	0.0479207	36.2161	0.195931	65.7805	7.21126	1341.76	219.163	36.2161	0.195931	NA
Spot 115	445.865	1513.12	0.6634	9.44568	8.57624	0.0751322	10.8843	0.00563556	0.718292	0.0659931	36.2272	0.259487	73.558	7.72333	1561.23	204.291	36.2272	0.259487	NA
Spot 92	265.641	784.248	0.918027	7.79783	9.09805	0.0863044	11.9209	0.00563702	0.537183	0.0450624	36.2365	0.19411	84.055	9.61684	1816.5	217.018	36.2365	0.19411	NA
Spot 29	378.435	1080.75	0.768946	9.41964	8.91128	0.0723406	12.4627	0.00564152	0.602415	0.0483376	36.2654	0.217855	70.9182	8.53691	1487.88	236.66	36.2654	0.217855	NA
Spot 49	534.235	1779.2	0.784473	11.1958	5.62427	0.0636819	6.83368	0.0056689	0.648037	0.09483	36.4409	0.235484	62.6861	4.15424	1232.91	133.607	36.4409	0.235484	NA
Spot 51	694.343	563.714	0.469245	10.3669	6.33294	0.0555565	33.8787	0.00567512	0.588483	0.0173703	36.4807	0.214077	54.8999	18.1074	957.399	712.479	36.4807	0.214077	NA
Spot 14	274.662	836.281	1.09052	8.42056	9.75601	0.0799238	11.3074	0.0056797	0.834554	0.0738063	36.5101	0.303835	78.0733	8.49737	1661.88	209.42	36.5101	0.303835	NA
Spot 30	262.874	358.204	1.59657	6.70235	9.33002	0.0872831	31.296	0.0057054	0.583336	0.0186393	36.6749	0.21333	84.9693	25.5152	1815.08	583.463	36.6749	0.21333	NA
Spot 85	162.906	431.652	1.02371	6.08116	11.6802	0.105546	18.5466	0.00570768	0.604344	0.0325851	36.6894	0.2211	101.883	17.9806	2152.53	326.659	36.6894	0.2211	NA
Spot 77	1246.2	1945.71	2.02174	15.3118	3.11396	0.0456507	5.89339	0.00571824	0.53327	0.0904862	36.7572	0.195457	45.3261	2.6125	526.025	128.781	36.7572	0.195457	NA
Spot 102	439.05	413.809	0.766703	9.55792	5.12894	0.0556911	18.9437	0.00576445	0.587092	0.0309914	37.0533	0.216913	55.0293	10.1475	930.39	392.011	37.0533	0.216913	NA
Spot 13	878.675	2755.32	1.47383	13.6123	4.46883	0.0547006	8.72098	0.00582829	0.648108	0.0743159	37.4625	0.242093	54.0762	4.59263	870.66	180.522	37.4625	0.242093	NA
Spot 117	575.623	1947.91	1.52307	11.7944	5.63631	0.0626472	9.25081	0.00586483	0.653579	0.070651	37.6967	0.245659	61.6979	5.53767	1133.39	184.069	37.6967	0.245659	NA
Spot 47	145.245	469.85	0.698556	5.83676	10.4913	0.11682	16.0788	0.00589563	0.829717	0.0516032	37.8941	0.313491	112.185	17.0788	2272.37	278.665	37.8941	0.313491	NA
Spot 86	416.778	497.299	0.746447	9.79063	9.08412	0.0598591	36.4265	0.00590736	0.596816	0.0163841	37.9693	0.225941	59.0303	20.8925	1027.51	761.741	37.9693	0.225941	NA
Spot 8	676.499	439.005	0.834231	8.09466	8.08518	0.0761068	32.7644	0.00602672	0.524407	0.0160054	38.7341	0.202515	74.478	23.533	1458.85	640.604	38.7341	0.202515	NA
Spot 20	283.309	178.617	1.19723	6.37867	10.5049	0.06494	81.9831	0.0061207	0.589402	0.00718931	39.3363	0.231143	63.8863	50.8047	1119.92	NA	39.3363	0.231143	NA
Spot 54	1449.41	7344.61	4.44047	18.0413	1.66229	0.0538881	4.05015	0.00730544	0.617009	0.152342	46.9227	0.288466	53.2936	2.10281	349.998	90.4913	46.9227	0.288466	NA
Spot 56	457.63	2310.1	6.75023	11.8455	6.42521	0.088102	6.8849	0.00813613	0.626658	0.0910192	52.2367	0.326023	85.7337	5.66041	1160.43	136.098	52.2367	0.326023	NA
Spot 15	1240.87	8221.99	38.9346	17.9496	1.83563	0.083469	2.56922	0.0112538	0.715927	0.278655	72.1414	0.513601	81.4012	2.00974	362.37	55.6542	72.1414	0.513601	NA
Spot 69	3253.83	31499.7	3.28399	20.3488	0.642776	0.115894	0.956766	0.0172514	0.493116	0.515399	110.261	0.539093	111.343	1.00896	134.508	19.2573	110.261	0.539093	NA
Spot 62	529.766	6968.66	1.51582	17.5838	1.9105	0.191779	2.98159	0.0253109	0.679308	0.227834	161.134	1.08103	178.146	4.87176	410.295	64.9451	161.134	1.08103	NA
Spot 45	798.967	12405.8	0.99101	18.7657	1.24552	0.191867	1.79194	0.0267073	0.411406	0.229587	169.907	0.689876	178.221	2.92904	289.966	39.8507	169.907	0.689876	NA
Spot 60	489.942	26518.4	2.47196	13.1446	0.795065	0.555805	1.04119	0.0531142	0.579505	0.556582	333.613	1.88413	448.792	3.77683	1092.27	17.3064	333.613	1.88413	NA
Spot 2	661.618	25107	1.27966	18.0769	1.00375	0.470887	1.389	0.0625656	0.578178	0.416255	391.21	2.19462	391.801	4.51514	395.273	28.3222	391.21	2.19462	NA
Spot 88	101.596	4500.79	1.52868	14.9076	3.40632	0.592974	3.9708	0.0673284	0.577411	0.145414	420.04	2.34803	472.765	15.0095	737.54	83.1773	420.04	2.34803	56.9515
Spot 99	184.871	8015.17	1.9181	17.0027	1.54076	0.601194	1.86086	0.0763581	0.623295	0.33495	474.348	2.85043	477.991	7.0945	495.506	38.6443	474.348	2.85043	95.7301
Spot 4	262.346	27131.7	1.82974	13.1404	0.845111	1.86646	1.15692	0.179516	0.619338	0.535336	1064.33	6.07639	1069.28	7.64914	1079.36	19.5956	1079.36	19.5956	98.6074
Spot 12	81.5088	8497.47	2.21178	12.5248	1.66325	2.04158	1.84947	0.189728	0.694063	0.375277	1119.9	7.1351	1129.49	12.6057	1147.96	34.0729	1147.96	34.0729	97.5553
Spot 40	520.512	61688.8	2.01859	12.264	0.613365	2.34815	0.893579	0.20982	0.591545	0.661995	1227.86	6.61351	1227	6.3634	1225.46	13.1594	1225.46	13.1594	100.196
Spot 5	229.993	32433.7	2.40272	11.2543	1.11757	2.87162	1.59175	0.236068	1.04569	0.656946	1366.22	12.8741	1374.5	11.9883	1387.36	23.0407	1387.36	23.0407	98.4768
Spot 75	46.0554	6817.82	0.889391	10.4245	1.98159	3.34521	2.36028	0.258014	1.0511	0.445329	1479.67	13.897	1491.67	18.4525	1508.76	39.9144	1508.76	39.9144	98.0722
Spot 65	709.817	103582	1.18859	9.15591	0.497933	4.64776	0.697526	0.308678	0.486348	0.697247	1734.2	7.395	1757.89	5.82858	1786.16	9.11146	1786.16	9.11146	97.0909
Spot 61	677.537	92593.9	2.6126	9.12917	0.544677	4.61265	0.773441	0.304393	0.54404	0.703402	1713.05	8.18419	1751.56	6.45425	1797.8	10.0056	1797.8	10.0056	95.2859
Spot 105	169	31195.2	1.27552	8.84434	0.668662	5.1224	0.877187	0.329918	0.543611	0.619721	1837.98	8.69336	1839.83	7.45216	1841.9	12.4604	1841.9	12.4604	99.7873
Spot 103	242.342	49398.2	1.24728	8.55835	0.663144	5.49589	0.929991	0.341765	0.609532	0.655417	1895.15	10.0084	1899.95	7.98945	1905.19	12.6186	1905.19	12.6186	99.4734
Spot 67	246.196	32082.6	2.15317	8.1783	0.5977	5.90193	0.824322	0.350891	0.547397	0.664057	1938.85	9.16585	1961.52	7.15743	1985.5	10.9682	1985.5	10.9682	97.6506
Spot 101	685.609	53143.1	3.39244	5.89305	0.579337	11.4628	0.821438	0.489712	0.567984	0.69145	2569.43	12.0363	2561.56	7.67164	2555.31	9.93321	2555.31	9.93321	100.553
Spot 57	124.528	42169.4	0.782479	5.25996	0.588214	13.8559	0.81301	0.526652	0.556585	0.684598	2727.33	12.3775	2739.91	7.69963	2749.18	9.74179	2749.18	9.74179	99.2052
ELM18DVTC-6
Spot 78	368.488	139.581	1.28286	5.47296	8.97043	0.0521081	40.0875	0.00465653	0.734752	0.0183287	29.9482	0.219535	51.5773	20.1623	1225.3	821.173	29.9482	0.219535	NA
Spot 102	428.679	1063.18	1.03063	9.47608	7.23906	0.0616074	14.4458	0.00484948	0.514669	0.0356275	31.1862	0.160118	60.7038	8.51239	1470.2	275.489	31.1862	0.160118	NA
Spot 77	328.724	778.401	0.857951	8.1587	10.2135	0.0709675	12.5778	0.00491759	0.541558	0.0430566	31.6231	0.170838	69.6171	8.46308	1708.44	232.182	31.6231	0.170838	NA
Spot 73	95.2736	251.055	1.58413	4.97951	16.4227	0.101722	21.9945	0.00495366	0.483624	0.0219884	31.8545	0.153676	98.3643	20.6226	2333.68	381.549	31.8545	0.153676	NA
Spot 49	220.906	740.449	1.23772	6.65892	9.56936	0.0913179	10.7985	0.00501687	0.630633	0.0583999	32.26	0.202934	88.7303	9.1751	2124.92	189.379	32.26	0.202934	NA
Spot 87	103.588	365.452	1.23533	4.78301	16.983	0.121286	21.5925	0.00503976	0.707842	0.0327819	32.4068	0.228814	116.237	23.7195	2601.66	364.413	32.4068	0.228814	NA
Spot 12	390.25	1194.98	0.654556	8.62977	7.20877	0.0729558	9.43656	0.00508977	0.512679	0.054329	32.7276	0.167362	71.5005	6.51519	1695.95	174.064	32.7276	0.167362	NA
Spot 98	183.626	563.805	1.19789	6.50002	11.5031	0.0930605	16.7021	0.00519393	0.548355	0.0328315	33.3956	0.182653	90.3504	14.4395	2097.24	295.457	33.3956	0.182653	NA
Spot 72	1131.66	3672.71	3.36394	14.7559	3.13695	0.0462481	4.92044	0.00527804	0.50552	0.102739	33.935	0.171097	45.906	2.20848	726.689	103.85	33.935	0.171097	NA
Spot 105	156.451	492.592	1.18746	5.03365	14.292	0.126389	17.6552	0.00529652	0.664099	0.0376149	34.0535	0.225552	120.848	20.1178	2587.52	297.006	34.0535	0.225552	NA
Spot 7	774	2195.31	1.72582	13.9222	4.17722	0.0483354	8.53415	0.00538684	0.614532	0.0720086	34.6326	0.212258	47.9297	3.99537	776.815	179.335	34.6326	0.212258	NA
Spot 32	476.182	1477.2	2.20876	10.0514	9.19356	0.0672786	9.68121	0.00542554	0.586512	0.0605825	34.8808	0.204027	66.1137	6.19675	1424.15	185	34.8808	0.204027	NA
Spot 22	304.115	914.839	2.11334	8.21867	12.4655	0.0798102	14.4651	0.00544537	0.638559	0.0441448	35.0079	0.22294	77.9665	10.8562	1736.88	266.412	35.0079	0.22294	NA
Spot 13	240.724	225.839	1.02578	6.86068	9.23593	0.0626472	49.638	0.00547307	0.525895	0.0105946	35.1855	0.184534	61.6979	29.7222	1269.63	1037.12	35.1855	0.184534	NA
Spot 20	608.321	1674.94	1.87714	11.8181	5.37907	0.0574302	11.6014	0.00549481	0.645048	0.0556008	35.3248	0.227239	56.7007	6.39787	1089.86	232.808	35.3248	0.227239	NA
Spot 54	2961.23	10120.2	8.119	18.1277	1.737	0.0408259	2.2183	0.0055418	0.7897	0.355993	35.6261	0.280563	40.6301	0.883504	347.107	46.8645	35.6261	0.280563	NA
Spot 99	1061.05	9281.25	1.88016	18.0664	1.96229	0.0961601	2.53328	0.01301	0.562644	0.222101	83.327	0.465817	93.2256	2.2565	354.526	55.7957	83.327	0.465817	NA
Spot 64	457.803	4821.82	2.10681	16.2508	2.96868	0.131245	3.84549	0.0163402	0.551156	0.143325	104.484	0.571228	125.216	4.53014	539.306	83.2731	104.484	0.571228	NA
Spot 29	284.086	15172.5	2.42352	11.1449	2.10235	0.230182	2.24534	0.0188179	0.530553	0.236291	120.181	0.631714	210.349	4.26596	1398.01	41.8295	120.181	0.631714	NA
Spot 79	450.243	6417.99	1.05351	17.4598	6.01968	0.181879	8.52514	0.0240735	5.52386	0.64795	153.349	8.37085	169.676	13.3219	403.855	145.534	153.349	8.37085	NA
Spot 6	484.526	6771.74	0.855452	17.6377	1.96601	0.182491	3.05587	0.0243328	0.623645	0.204081	154.981	0.955007	170.202	4.78863	387.359	67.1815	154.981	0.955007	NA
Spot 114	229.145	3843.25	0.923966	14.0905	3.84734	0.22637	4.41901	0.0244676	0.536626	0.121436	155.829	0.826195	207.198	8.28251	840.882	91.3691	155.829	0.826195	NA
Spot 25	726.051	10972.1	1.46515	18.3616	1.92421	0.179147	2.2591	0.0245201	0.726849	0.321742	156.16	1.12141	167.326	3.48505	328.344	48.5198	156.16	1.12141	NA
Spot 92	568.375	6490.19	1.99927	18.3423	1.8269	0.176125	3.7552	0.0245376	0.930295	0.247735	156.27	1.43629	164.721	5.70999	287.948	83.1728	156.27	1.43629	NA
Spot 69	2015.94	17615.6	1.95103	19.6391	0.953378	0.169494	1.18653	0.0246523	0.610652	0.514651	156.992	0.947094	158.979	1.74609	188.672	23.6749	156.992	0.947094	NA
Spot 117	454.563	4355.22	1.52913	16.9773	2.3226	0.189368	4.22782	0.0247709	0.897052	0.212178	157.738	1.39782	176.09	6.83507	430.196	92.1194	157.738	1.39782	NA
Spot 34	526.965	1661.47	1.37069	16.3242	2.67859	0.178847	12.6432	0.0247901	0.528854	0.041829	157.859	0.824703	167.068	19.479	299.579	289.13	157.859	0.824703	NA
Spot 96	969.355	14246.5	1.15725	19.0668	1.23362	0.175199	1.97521	0.0248086	0.593564	0.300507	157.975	0.926285	163.921	2.98995	250.661	43.3451	157.975	0.926285	NA
Spot 90	432.915	6206.35	1.21907	18.025	1.77246	0.181148	2.43701	0.0248293	0.586028	0.24047	158.105	0.91527	169.048	3.79507	325.09	53.714	158.105	0.91527	NA
Spot 45	568.122	7101.62	1.18581	17.7534	1.50426	0.185745	3.32789	0.0248796	0.607349	0.182503	158.421	0.950444	172.992	5.29333	377.14	73.6063	158.421	0.950444	NA
Spot 101	847.837	10586.7	1.23144	18.8749	1.36573	0.176486	1.89416	0.0248861	0.555415	0.293225	158.463	0.869395	165.033	2.88517	260.363	41.6204	158.463	0.869395	NA
Spot 103	256.1	3950.09	1.12279	15.6612	2.8139	0.20596	3.44087	0.0248927	0.513943	0.149364	158.504	0.804685	190.157	5.96696	603.845	73.6127	158.504	0.804685	NA
Spot 106	444.111	7322.22	0.894392	17.7427	2.3158	0.186306	3.16949	0.0249107	0.580485	0.183147	158.617	0.909512	173.472	5.05421	381.11	70.0567	158.617	0.909512	NA
Spot 116	1281.02	19825.7	1.19723	19.3437	1.15198	0.174692	1.38059	0.0249112	0.63519	0.460087	158.621	0.995247	163.482	2.0847	234.509	28.2711	158.621	0.995247	NA
Spot 113	571.789	10243.2	1.69532	17.6965	2.08784	0.188937	2.41268	0.0249289	0.676374	0.280341	158.731	1.06051	175.722	3.89305	410.919	51.8188	158.731	1.06051	NA
Spot 1	1477.63	18919	1.87053	19.3708	0.977782	0.17447	1.41828	0.0249352	0.653562	0.460814	158.771	1.02499	163.291	2.1393	229.317	29.0643	158.771	1.02499	NA
Spot 89	2417.42	42374.5	1.49326	19.9855	0.816075	0.170205	1.0892	0.0249394	0.64874	0.595614	158.798	1.0176	159.597	1.60859	171.444	20.4343	158.798	1.0176	NA
Spot 53	724.794	11964	1.74732	19.1511	1.53147	0.174771	2.81949	0.0249685	0.589006	0.208905	158.981	0.924955	163.551	4.25912	230.214	63.7032	158.981	0.924955	NA
Spot 59	419.26	5528.29	1.53715	17.1805	2.05906	0.190206	2.87413	0.0249851	0.638856	0.222278	159.085	1.00389	176.805	4.66381	420.834	62.5903	159.085	1.00389	NA
Spot 67	372.972	4715.4	1.19515	16.4193	2.74735	0.198303	3.74775	0.024988	0.503678	0.134395	159.104	0.791562	183.689	6.29751	512.906	81.6336	159.104	0.791562	NA
Spot 80	343.519	4625.06	1.33698	16.3181	2.82684	0.199965	4.86384	0.025039	0.635478	0.130654	159.424	1.00068	185.097	8.23009	526.796	105.78	159.424	1.00068	NA
Spot 31	1396.61	21699	1.65387	19.5697	0.96882	0.173945	1.32586	0.0250454	0.561079	0.42318	159.465	0.883747	162.837	1.99477	212.131	27.8383	159.465	0.883747	NA
Spot 39	678.214	9371.18	0.725164	18.3059	1.73842	0.182892	2.3738	0.0250684	0.545348	0.229736	159.609	0.859737	170.546	3.72672	325.085	52.4605	159.609	0.859737	NA
Spot 68	542.454	7962.96	1.89462	17.1136	2.46009	0.194929	2.89843	0.0250749	0.615363	0.212309	159.65	0.970361	180.826	4.80097	467.409	62.7543	159.65	0.970361	NA
Spot 97	535.073	5690.81	0.711627	17.9129	1.73123	0.183403	2.47503	0.0250751	0.489708	0.197859	159.651	0.772223	170.985	3.89481	330.837	55.0347	159.651	0.772223	NA
Spot 111	1388.36	18216.2	1.17977	19.2514	1.33907	0.176732	1.81557	0.0251169	0.891848	0.491221	159.914	1.40865	165.245	2.76874	242.283	36.4537	159.914	1.40865	NA
Spot 23	228.415	3189.71	1.20725	14.3948	3.86346	0.224284	6.19777	0.0251321	0.57205	0.0922995	160.01	0.90407	205.469	11.5292	765.366	130.122	160.01	0.90407	NA
Spot 5	986.271	13274.1	1.66938	18.749	1.11703	0.180523	1.61472	0.0251332	0.535008	0.331333	160.016	0.845563	168.51	2.50718	289.5	34.8019	160.016	0.845563	NA
Spot 37	610.772	9901.03	1.7075	17.4153	1.75468	0.193513	2.27307	0.0251402	0.496563	0.218455	160.06	0.785015	179.623	3.7422	445.459	49.3339	160.06	0.785015	NA
Spot 76	1401.96	18472.9	1.41502	19.5215	1.00875	0.174321	1.45934	0.0251434	0.617407	0.423073	160.08	0.976176	163.162	2.19963	208.089	30.6629	160.08	0.976176	NA
Spot 28	499.95	7950.78	1.70468	16.3473	2.50168	0.205391	2.76044	0.0251473	0.525527	0.190378	160.105	0.831032	189.678	4.77601	575.81	58.9422	160.105	0.831032	NA
Spot 88	928.414	13271.2	1.73527	18.9525	1.09117	0.178694	1.6193	0.0251743	0.542798	0.335206	160.275	0.859243	166.936	2.49268	262.425	35.0122	160.275	0.859243	NA
Spot 57	713.882	7362.03	1.51101	17.8828	1.46378	0.186677	3.71754	0.0252321	0.580449	0.156138	160.638	0.920903	173.79	5.93812	356.711	82.9277	160.638	0.920903	NA
Spot 19	1001.51	12696.1	1.81179	19.3749	1.10788	0.174864	1.93052	0.0252394	0.619203	0.320744	160.684	0.982666	163.632	2.91756	206.47	42.4308	160.684	0.982666	NA
Spot 118	886.583	8414.73	0.830532	18.8757	1.42071	0.178194	2.70643	0.0252729	0.712942	0.263425	160.895	1.13289	166.505	4.15629	247.039	60.1292	160.895	1.13289	NA
Spot 93	516.581	6963.55	0.610473	17.0905	2.33985	0.195953	3.3233	0.0252768	0.60103	0.180853	160.919	0.9552	181.696	5.52895	461.245	72.4952	160.919	0.9552	NA
Spot 40	942.415	12604.1	0.760484	18.897	1.2657	0.179886	2.30008	0.0252804	0.611162	0.265713	160.942	0.971439	167.963	3.56068	268.037	50.8446	160.942	0.971439	NA
Spot 110	2751.27	39855.5	2.83033	20.0995	0.656933	0.171848	0.887317	0.0252861	0.464226	0.523179	160.978	0.738046	161.022	1.32124	161.649	17.6719	160.978	0.738046	NA
Spot 112	871.209	11127.9	1.00848	18.6883	1.22818	0.18175	1.87338	0.0253086	0.543686	0.290217	161.12	0.865129	169.565	2.92554	289.125	40.9681	161.12	0.865129	NA
Spot 15	704.505	6158.18	2.06343	17.9517	1.53125	0.185576	2.54426	0.0253296	0.548093	0.215423	161.251	0.872846	172.847	4.04377	334.645	56.2996	161.251	0.872846	NA
Spot 61	441.684	6343.15	0.840021	17.5089	1.9522	0.19033	2.80897	0.0253457	0.535996	0.190816	161.352	0.854109	176.911	4.56058	390.228	61.8864	161.352	0.854109	NA
Spot 108	814.581	11103.6	2.40279	18.6198	1.40195	0.182813	2.58879	0.0253622	0.502646	0.194163	161.457	0.801476	170.478	4.06274	297.583	57.9627	161.457	0.801476	NA
Spot 2	1355.19	19048	1.82679	19.9192	0.979175	0.172588	1.34211	0.0253734	0.622391	0.463741	161.527	0.992839	161.662	2.00578	163.623	27.8121	161.527	0.992839	NA
Spot 3	983.276	14331.4	1.45303	18.9059	1.13943	0.18103	1.91064	0.0253794	0.634214	0.331938	161.565	1.01193	168.946	2.97372	273.601	41.3214	161.565	1.01193	NA
Spot 52	725.892	10583.9	1.88488	18.6506	1.34176	0.182146	1.74358	0.0254026	0.60997	0.349837	161.71	0.974115	169.906	2.72786	285.615	37.35	161.71	0.974115	NA
Spot 62	668.976	9511.98	0.736403	18.308	2.02183	0.184871	2.92153	0.0254026	0.575063	0.196836	161.71	0.91837	172.243	4.6285	319.475	65.0959	161.71	0.91837	NA
Spot 51	323.619	4331.06	1.3432	16.6031	2.70884	0.198338	3.90861	0.0254076	0.531257	0.13592	161.742	0.848575	183.719	6.56879	476.616	85.6448	161.742	0.848575	NA
Spot 30	782.884	11231.4	0.838336	18.7704	1.37096	0.181967	2.06151	0.0254203	0.663919	0.322054	161.822	1.06099	169.751	3.22258	281.779	44.6823	161.822	1.06099	NA
Spot 8	563.34	7537.85	1.42375	18.1606	1.60475	0.186046	2.34096	0.0254568	0.584606	0.249729	162.051	0.935551	173.25	3.72859	328.995	51.4137	162.051	0.935551	NA
Spot 18	1225.26	18058.8	1.14451	19.2835	1.04569	0.178647	1.27947	0.0254785	0.520206	0.406579	162.188	0.833186	166.896	1.96912	234.21	26.9672	162.188	0.833186	NA
Spot 75	1233.58	16925.9	1.73478	19.6395	1.06617	0.175363	1.85845	0.0254861	0.678378	0.365024	162.235	1.08684	164.063	2.81545	190.533	40.2522	162.235	1.08684	NA
Spot 38	981.235	2912.76	1.73502	17.5308	1.86312	0.182445	5.54917	0.0255109	0.514125	0.092649	162.391	0.824465	170.162	8.69401	279.649	126.535	162.391	0.824465	NA
Spot 109	2027.15	8114.21	0.962431	19.4839	0.775388	0.173888	1.3675	0.02552	0.565602	0.413604	162.448	0.90733	162.787	2.05683	167.699	29.0946	162.448	0.90733	NA
Spot 11	629.512	11582.7	0.677445	17.8409	1.90661	0.19224	2.37719	0.0255207	0.659265	0.277329	162.453	1.05761	178.539	3.89203	397.188	51.1837	162.453	1.05761	NA
Spot 35	413.055	5894.61	1.50643	17.2215	2.20279	0.195737	2.73184	0.0255922	0.549208	0.20104	162.902	0.883461	181.512	4.54071	431.223	59.6437	162.902	0.883461	NA
Spot 26	1308.04	19246.3	1.86658	19.1998	1.02323	0.181359	1.58377	0.0256961	0.60095	0.379443	163.555	0.970522	169.229	2.46877	249.301	33.7332	163.555	0.970522	NA
Spot 104	913.43	13287.7	1.48387	18.8516	1.295	0.183832	1.67883	0.0257262	0.590764	0.35189	163.744	0.955161	171.353	2.6471	277.749	35.9815	163.744	0.955161	NA
Spot 16	564.577	8369.59	1.09192	17.8005	1.83834	0.192568	2.11617	0.0257509	0.608496	0.287546	163.9	0.984751	178.818	3.46963	380.851	45.5631	163.9	0.984751	NA
Spot 119	951.647	14198.4	1.16397	19.157	1.12253	0.1814	1.46203	0.0257604	0.68316	0.467267	163.959	1.10598	169.264	2.27944	244.09	29.7569	163.959	1.10598	NA
Spot 47	1061.81	15925	1.5268	19.3185	1.03826	0.180351	1.34694	0.0257851	0.501024	0.371971	164.115	0.811875	168.362	2.08971	228.49	28.8756	164.115	0.811875	NA
Spot 27	509.495	6920.5	1.4286	17.6942	1.97451	0.193458	2.6041	0.0258576	0.818773	0.314417	164.57	1.3304	179.575	4.28616	381.917	55.5497	164.57	1.3304	NA
Spot 58	215.091	3430.15	2.22832	14.9337	3.98032	0.22521	5.73437	0.0261977	0.579325	0.101027	166.707	0.953394	206.237	10.7031	686.091	121.836	166.707	0.953394	NA
Spot 42	951.038	1605.49	1.16698	16.4567	1.74791	0.187528	15.7288	0.0264191	0.582477	0.0370326	168.097	0.966473	174.518	25.2253	262.41	NA	168.097	0.966473	NA
Spot 60	603.504	9723.59	0.985716	17.3692	1.80588	0.205464	2.06743	0.0267448	0.485165	0.234671	170.143	0.814675	189.739	3.57803	441.127	44.7231	170.143	0.814675	NA
Spot 9	217.318	10137.5	1.56467	16.9438	1.63289	0.613371	2.42447	0.0774217	0.658819	0.271738	480.715	3.05184	485.684	9.35938	509.177	51.3214	480.715	3.05184	94.41
Spot 41	171.927	14867.5	2.13089	13.5617	0.964755	1.72773	1.27685	0.172663	0.555236	0.434849	1026.77	5.27014	1018.91	8.21207	1002.03	23.3444	1002.03	23.3444	102.469
Spot 94	54.4893	5336.89	1.86839	12.9105	2.60671	1.88501	3.02479	0.183492	0.618694	0.204541	1086.02	6.18366	1075.83	20.0701	1055.25	59.6356	1055.25	59.6356	102.916
Spot 84	294.818	27863.6	1.56608	13.2589	0.770686	1.82142	1.0477	0.176996	0.620173	0.591936	1050.54	6.01201	1053.2	6.86779	1058.72	17.0167	1058.72	17.0167	99.2277
Spot 91	79.002	7889.51	0.749022	12.9907	1.62784	1.88852	2.30194	0.182895	0.654183	0.284187	1082.77	6.52039	1077.06	15.2828	1065.54	44.3853	1065.54	44.3853	101.617
Spot 14	585.84	15391.4	0.801651	13.0974	0.64767	1.64435	1.20085	0.158678	0.588142	0.489771	949.425	5.19223	987.383	7.58233	1072.75	21.0305	1072.75	21.0305	88.5036
Spot 63	168.029	17481.5	2.08532	13.0531	1.07497	1.95339	1.49433	0.18775	0.82758	0.553814	1109.17	8.43302	1099.61	10.0359	1080.72	24.9559	1080.72	24.9559	102.633
Spot 74	299.46	34873.4	2.99222	13.1118	0.631494	1.92374	0.846814	0.184457	0.52785	0.623336	1091.28	5.29913	1089.37	5.65757	1085.55	13.2644	1085.55	13.2644	100.528
Spot 66	85.5027	8754.56	2.28472	12.624	1.51714	2.00252	1.92731	0.188011	0.476468	0.247219	1110.59	4.86089	1116.37	13.0526	1127.6	37.2098	1127.6	37.2098	98.4916
Spot 46	55.5111	5945.67	2.0739	12.3395	2.05444	1.92542	2.93467	0.17792	0.54632	0.18616	1055.6	5.31954	1089.95	19.6146	1159.21	57.1789	1159.21	57.1789	91.0618
Spot 50	188.97	20824.3	4.52411	12.5377	0.862631	2.2223	1.19014	0.204704	0.575011	0.483146	1200.54	6.29853	1188.09	8.33439	1165.5	20.6461	1165.5	20.6461	103.007
Spot 86	169.113	18771.6	2.33378	12.5152	0.844913	2.13036	1.25969	0.19593	0.574938	0.456414	1153.42	6.07203	1158.7	8.70485	1168.58	22.2021	1168.58	22.2021	98.7025
Spot 85	84.2309	11926.9	1.40335	11.3828	1.4001	2.78586	1.76843	0.233962	0.514551	0.290964	1355.23	6.28912	1351.75	13.2141	1346.23	32.6703	1346.23	32.6703	100.668
Spot 65	245.171	24573	2.35656	11.262	0.590087	2.82865	0.894783	0.233581	0.458062	0.511925	1353.24	5.59129	1363.17	6.71255	1378.74	14.775	1378.74	14.775	98.1503
Spot 56	232.869	36210.8	1.90998	10.9163	0.617281	3.09825	0.823614	0.247407	0.484144	0.587829	1425.09	6.19008	1432.26	6.32233	1442.91	12.6951	1442.91	12.6951	98.7649
Spot 10	291.946	47310	0.969033	10.7971	0.629145	3.16705	0.869238	0.249342	0.573668	0.659967	1435.08	7.38064	1449.16	6.70812	1469.86	12.3978	1469.86	12.3978	97.6341
Spot 83	174.924	25857.7	0.887921	9.66182	0.808827	4.04481	1.11288	0.286069	0.730377	0.656293	1621.85	10.473	1643.26	9.06034	1670.73	15.5256	1670.73	15.5256	97.0747
Spot 33	23.2539	3881.44	4.3265	9.32899	2.90121	4.42314	3.52927	0.309886	0.565664	0.160278	1740.15	8.62672	1716.68	29.2358	1688.17	64.2903	1688.17	64.2903	103.079
Spot 100	148.061	27533.6	2.0719	9.55949	0.636857	4.23934	0.805703	0.296242	0.47997	0.595716	1672.65	7.0712	1681.67	6.61961	1692.93	11.9313	1692.93	11.9313	98.8018
Spot 55	370.491	73327	2.83249	9.48196	0.659624	4.4403	0.92552	0.307237	0.63061	0.681358	1727.1	9.55429	1719.89	7.67032	1711.11	12.4614	1711.11	12.4614	100.934
Spot 70	830.858	124227	4.78063	9.18801	0.635185	4.42614	0.899872	0.296545	0.634517	0.705119	1674.15	9.35544	1717.24	7.45337	1770.18	11.6511	1770.18	11.6511	94.5753
Spot 71	379.627	61176.5	3.01702	9.15362	0.650854	4.75548	0.931191	0.317744	0.662595	0.711556	1778.7	10.2994	1777.08	7.8125	1775.15	11.9395	1775.15	11.9395	100.2
Spot 21	387.407	66385.9	2.89313	9.14924	0.821368	4.75902	1.1509	0.31769	0.801309	0.696245	1778.44	12.454	1777.7	9.65718	1776.82	15.0728	1776.82	15.0728	100.091
Spot 95	272.124	32928.3	2.83428	9.12833	0.688346	4.59108	0.948388	0.306281	0.615723	0.649231	1722.38	9.30652	1747.65	7.90759	1778	13.1587	1778	13.1587	96.872
Spot 81	408.808	75251.8	3.04139	9.13391	0.723125	4.74561	0.987132	0.316057	0.669785	0.678516	1770.44	10.3692	1775.33	8.27886	1781.07	13.223	1781.07	13.223	99.4037
Spot 120	537.839	92513.8	4.32816	9.14433	0.658777	4.76724	0.936822	0.317177	0.656571	0.700849	1775.93	10.192	1779.15	7.86312	1782.91	12.1827	1782.91	12.1827	99.6086
Spot 107	345.59	73000.2	1.42526	9.13663	0.55015	4.93419	0.761969	0.328256	0.51995	0.682378	1829.92	8.28344	1808.12	6.4332	1783.07	10.154	1783.07	10.154	102.628
Spot 115	382.441	20930.9	1.08731	8.64157	0.703114	5.10931	1.05733	0.322621	0.688251	0.65093	1802.52	10.8224	1837.65	8.97891	1877.67	14.4656	1877.67	14.4656	95.9975
Spot 24	195.688	41846.7	1.52564	8.29299	0.617769	5.81276	0.854122	0.351455	0.577967	0.676679	1941.54	9.68923	1948.31	7.39975	1955.51	11.2287	1955.51	11.2287	99.2858
Spot 82	427.347	115499	1.12195	5.41064	0.588951	12.9336	0.807625	0.509699	0.551667	0.683073	2655.34	12.0066	2674.82	7.61209	2689.57	9.7467	2689.57	9.7467	98.7275
ELM18DVTC-7
Spot 110	271.655	73.3769	2.31453	3.46221	24.8034	0.0150922	181.677	0.00108561	0.582414	0.00320577	6.9945	0.0407149	15.2098	27.4335	1639.37	NA	6.9945	0.0407149	NA
Spot 68	198.077	179.409	2.59741	4.85137	17.3257	0.0531689	56.5533	0.00291612	0.525817	0.00929772	18.7711	0.0985582	52.6005	28.9978	2127.86	1094.57	18.7711	0.0985582	NA
Spot 114	96.7029	241.467	4.04382	4.67784	14.7214	0.067725	20.3398	0.00305584	0.595474	0.0292763	19.6692	0.116946	66.5383	13.1006	2463.42	347.456	19.6692	0.116946	NA
Spot 39	347.75	177.322	3.6711	5.97116	10.3596	0.0382033	81.7718	0.00314195	0.658516	0.0080531	20.2226	0.13296	38.0683	30.5621	1386.52	2033.94	20.2226	0.13296	NA
Spot 78	475.658	188.753	3.15668	7.01853	6.78597	0.0318645	38.7784	0.00350921	0.574559	0.0148164	22.5822	0.129521	31.8499	12.1598	801.789	843.152	22.5822	0.129521	NA
Spot 88	848.857	235.445	2.27252	7.82488	6.09113	0.0323915	41.3567	0.00353707	0.572113	0.0138336	22.7612	0.12999	32.3684	13.1761	819.6	901.815	22.7612	0.12999	NA
Spot 100	126.853	364.661	2.7111	6.3011	16.5617	0.0599967	33.6798	0.00357299	0.620925	0.0184361	22.992	0.142509	59.1621	19.3587	1982.52	618.499	22.992	0.142509	NA
Spot 4	591.992	1325.66	2.09545	11.3539	5.82613	0.038847	13.832	0.00363904	0.480285	0.0347228	23.4162	0.11226	38.6977	5.25199	1132.1	276.506	23.4162	0.11226	NA
Spot 20	696.775	506.101	1.99798	9.89124	6.66292	0.0366216	23.3535	0.00365566	0.654502	0.0280259	23.5229	0.153678	36.5203	8.3774	1004.35	480.083	23.5229	0.153678	NA
Spot 62	378.051	891.589	1.99267	8.00326	10.5385	0.0551453	11.5455	0.00365966	0.543297	0.0470571	23.5486	0.127706	54.5042	6.12694	1787.54	210.864	23.5486	0.127706	NA
Spot 103	275.229	678.182	2.0108	5.58612	13.1795	0.0807592	13.5401	0.00366237	0.790972	0.0584168	23.566	0.18606	78.8585	10.2738	2454.9	229.713	23.566	0.18606	NA
Spot 18	549.661	1491.81	2.36957	10.9487	6.07183	0.0412847	10.01	0.00366769	0.633339	0.0632707	23.6002	0.149196	41.0775	4.02982	1236.87	196.353	23.6002	0.149196	NA
Spot 10	1465.46	709.662	1.57435	12.2696	3.65935	0.0309131	14.7941	0.00367163	0.657852	0.0444671	23.6255	0.155136	30.9133	4.50446	641.5	319.394	23.6255	0.155136	NA
Spot 50	658.462	940.241	1.7565	10.7081	6.18822	0.0396394	17.1074	0.00368474	0.545417	0.031882	23.7097	0.129079	39.4719	6.62313	1147.44	342.093	23.7097	0.129079	NA
Spot 35	1043.34	675.038	1.76481	11.1734	5.39017	0.0345613	25.123	0.0036865	0.5801	0.0230904	23.721	0.137353	34.5002	8.52207	868.379	528.52	23.721	0.137353	NA
Spot 42	190.461	438.159	2.50076	5.94636	12.5015	0.0701481	17.3765	0.00368993	0.71101	0.0409179	23.7431	0.168505	68.84	11.566	2200.71	303.997	23.7431	0.168505	NA
Spot 8	301.019	613.316	2.18912	7.19595	9.81796	0.0595944	12.1101	0.00369278	0.614259	0.0507227	23.7613	0.145687	58.7767	6.91595	1911.56	217.926	23.7613	0.145687	NA
Spot 41	796.949	578.505	2.11079	11.1067	5.76871	0.0330482	26.0732	0.00369595	0.5806	0.022268	23.7817	0.137822	33.014	8.46958	769.503	557.773	23.7817	0.137822	NA
Spot 23	804.274	1647.04	2.39699	10.6242	6.61601	0.0435419	8.73105	0.0037003	0.660909	0.0756964	23.8096	0.15707	43.2763	3.6991	1323.33	168.951	23.8096	0.15707	NA
Spot 119	302.07	594.418	2.63476	7.33244	9.94874	0.0578214	20.0247	0.00370461	0.581908	0.0290595	23.8373	0.138455	57.0762	11.1145	1851.39	365.728	23.8373	0.138455	NA
Spot 71	332.498	593.702	2.3727	8.26189	8.62283	0.0497997	23.1441	0.00370667	0.563918	0.0243655	23.8506	0.134249	49.347	11.1483	1575.69	439.11	23.8506	0.134249	NA
Spot 28	288.503	642.203	2.23344	7.3672	9.92698	0.0585149	17.2948	0.00370985	0.577243	0.0333766	23.871	0.137539	57.7416	9.70798	1870.36	314.253	23.871	0.137539	NA
Spot 80	603.02	1406.52	2.36071	11.7492	6.70462	0.0383014	8.50338	0.00371593	0.557788	0.065596	23.91	0.13312	38.1643	3.18504	1061.97	171.004	23.91	0.13312	NA
Spot 60	307.602	652.772	1.76736	8.85729	11.3467	0.0468866	23.2648	0.00372903	0.558284	0.0239969	23.9942	0.133706	46.5255	10.5802	1450.58	448.827	23.9942	0.133706	NA
Spot 59	670.786	1583.83	2.278	11.1884	5.95623	0.0412789	6.47929	0.00373571	0.56602	0.0873584	24.0371	0.135801	41.0719	2.60807	1200.47	127.344	24.0371	0.135801	NA
Spot 61	487.854	1251.15	2.62996	7.52335	6.54124	0.0629302	7.66269	0.00374799	0.741201	0.0967286	24.1159	0.178414	61.9682	4.60647	1982.38	135.965	24.1159	0.178414	NA
Spot 79	1068.76	2161.92	1.79434	13.5698	4.25422	0.0345671	7.63237	0.00375116	0.546077	0.0715475	24.1363	0.131556	34.5058	2.58937	832.594	158.901	24.1363	0.131556	NA
Spot 113	390.855	976.003	2.95978	7.79894	8.17869	0.0589428	13.6223	0.00375181	0.858612	0.0630298	24.1405	0.206886	58.1521	7.69925	1863.22	246.633	24.1405	0.206886	NA
Spot 14	949.237	808.234	1.65395	11.8408	4.88497	0.0344024	17.6813	0.00375492	0.520186	0.0294202	24.1604	0.125444	34.3442	5.971	820.564	371.801	24.1604	0.125444	NA
Spot 31	387.124	992.585	1.75724	7.87783	8.47104	0.0585327	11.0694	0.00375785	0.706813	0.0638531	24.1793	0.170582	57.7587	6.21515	1847.69	200.445	24.1793	0.170582	NA
Spot 81	755.568	1597.29	1.99922	10.8429	5.51038	0.0431024	8.54278	0.00375934	0.533923	0.0624999	24.1888	0.128908	42.8485	3.58431	1272.86	166.628	24.1888	0.128908	NA
Spot 51	343.797	798.216	2.20467	7.50819	9.69569	0.0601339	14.6324	0.00376303	0.566406	0.038709	24.2125	0.136884	59.2935	8.42781	1893.89	264.481	24.2125	0.136884	NA
Spot 26	324.125	833.616	2.49299	7.19171	12.4503	0.0638634	17.6719	0.0037748	0.530806	0.0300368	24.2881	0.12868	62.8593	10.772	1995.89	316.547	24.2881	0.12868	NA
Spot 96	436.654	1164.92	1.87175	9.00168	9.43804	0.0515453	12.4847	0.00377633	0.564154	0.0451877	24.2979	0.13682	51.0339	6.21402	1605.28	233.481	24.2979	0.13682	NA
Spot 92	691.649	1470.48	2.78346	11.3083	7.26737	0.0409694	12.6558	0.00377954	0.606711	0.0479394	24.3186	0.147265	40.7701	5.0576	1162.5	251.523	24.3186	0.147265	NA
Spot 95	1788.84	4701.17	2.54798	15.766	3.77624	0.0313827	5.72326	0.00378161	0.705697	0.123303	24.3319	0.171386	31.3757	1.76825	610.329	122.859	24.3319	0.171386	NA
Spot 83	366.811	867.336	2.34637	7.52312	9.17505	0.0610676	12.3649	0.00378277	0.51469	0.0416252	24.3393	0.125036	60.1874	7.22594	1912.17	222.623	24.3393	0.125036	NA
Spot 101	430.073	1108.84	2.97945	9.80798	7.27998	0.0465356	9.52858	0.00378484	0.517247	0.0542837	24.3526	0.125725	46.185	4.30221	1407.88	182.541	24.3526	0.125725	NA
Spot 3	616.632	1498.37	1.91576	10.543	6.17959	0.0446901	7.48454	0.00378906	0.590428	0.0788863	24.3797	0.143673	44.3929	3.25103	1327.83	144.612	24.3797	0.143673	NA
Spot 33	1952.81	3626.16	2.57935	16.14	2.69435	0.0301847	6.94859	0.00378913	0.733447	0.105553	24.3801	0.178477	30.1956	2.06728	521.254	151.778	24.3801	0.178477	NA
Spot 16	714.956	1876.99	2.16715	12.5899	6.38785	0.0374632	11.339	0.00379381	0.55099	0.0485926	24.4102	0.134243	37.3442	4.15755	975.124	231.603	24.4102	0.134243	NA
Spot 70	878.133	1872.07	1.82184	12.6806	4.60098	0.03723	8.73011	0.00380356	0.523559	0.0599716	24.4728	0.127887	37.116	3.18177	957.123	178.47	24.4728	0.127887	NA
Spot 98	708.302	1491.51	2.51213	10.6977	6.26006	0.0440205	11.5148	0.00380845	0.528186	0.0458701	24.5042	0.129182	43.7418	4.92987	1288.62	224.61	24.5042	0.129182	NA
Spot 44	664.669	1603.73	1.88797	11.0204	6.21707	0.0428924	9.06501	0.00380922	0.493783	0.0544713	24.5092	0.120792	42.6441	3.78566	1237.55	177.812	24.5092	0.120792	NA
Spot 87	546.447	1227.06	2.11229	10.8317	6.56192	0.0423353	12.6316	0.00380967	0.520609	0.0412147	24.5121	0.12737	42.1015	5.20941	1211.59	249.347	24.5121	0.12737	NA
Spot 72	906.617	2268.99	2.13948	13.3535	4.42255	0.0358993	9.65621	0.00380979	0.887568	0.0919169	24.5128	0.217155	35.8125	3.39787	878.93	199.394	24.5128	0.217155	NA
Spot 17	1560.01	2174.41	2.02801	14.6009	2.93116	0.0324198	4.8617	0.00381323	0.569245	0.117088	24.5349	0.139398	32.3962	1.55015	662.378	103.511	24.5349	0.139398	NA
Spot 37	2020.3	2992.09	2.4618	16.568	2.94966	0.0290947	4.73533	0.00381481	0.569213	0.120206	24.5451	0.139448	29.1207	1.35938	424.942	104.923	24.5451	0.139448	NA
Spot 69	1043.84	2680.98	2.11715	12.8559	3.82827	0.0380468	7.60704	0.00382035	0.553925	0.0728174	24.5806	0.135899	37.9153	2.83105	992.392	154.452	24.5806	0.135899	NA
Spot 75	1336.73	3035.55	0.997208	15.1117	3.99329	0.0322408	6.64109	0.00382037	0.532193	0.0801365	24.5808	0.130568	32.2201	2.10617	646.522	142.358	24.5808	0.130568	NA
Spot 22	483.465	1099.98	1.93733	8.48234	7.64801	0.0554422	9.20081	0.00382324	0.566533	0.0615742	24.5992	0.139097	54.7899	4.90756	1717.34	169.166	24.5992	0.139097	NA
Spot 117	472.231	972.153	2.84494	9.55451	7.89901	0.0474254	10.3073	0.00382573	0.642667	0.0623509	24.6152	0.157892	47.0479	4.73875	1423.55	197.019	24.6152	0.157892	NA
Spot 66	867.13	2256.31	2.8978	12.8906	3.81402	0.0374571	5.11517	0.00382695	0.479462	0.0937334	24.623	0.117833	37.3383	1.87523	957.022	104.189	24.623	0.117833	NA
Spot 24	655.981	1477.87	2.13824	11.1879	6.48675	0.0420094	7.2946	0.00382825	0.580395	0.079565	24.6314	0.142686	41.784	2.98612	1186.81	143.787	24.6314	0.142686	NA
Spot 47	232.301	543.955	1.63879	6.46423	11.4949	0.0686291	16.4383	0.00383057	0.62685	0.0381336	24.6463	0.1542	67.3976	10.7197	2097.14	290.669	24.6463	0.1542	NA
Spot 102	398.566	943.192	1.98796	8.41637	9.11329	0.0549907	10.3432	0.00383179	0.675747	0.0653327	24.6541	0.166281	54.3555	5.4743	1698.18	190.692	24.6541	0.166281	NA
Spot 30	732.712	1778.91	3.29615	11.7641	5.54075	0.0405752	7.76784	0.00383237	0.645938	0.0831554	24.6579	0.15897	40.3855	3.07552	1115.66	154.701	24.6579	0.15897	NA
Spot 2	954.648	2051.43	2.01373	13.4391	5.11538	0.0355887	5.49902	0.00383239	0.661597	0.120312	24.6579	0.162825	35.508	1.91885	848.614	113.58	24.6579	0.162825	NA
Spot 93	882.384	2176.23	3.46607	11.8253	5.41613	0.0411548	6.04819	0.00383456	0.621355	0.102734	24.6719	0.153007	40.9509	2.42751	1142.78	119.715	24.6719	0.153007	NA
Spot 90	925.259	1687.59	1.76266	13.1341	4.06392	0.0357231	10.6901	0.00384031	0.43339	0.0405411	24.7088	0.10688	35.6398	3.74387	852.184	222.53	24.7088	0.10688	NA
Spot 74	1239.17	2950.29	2.11382	15.0253	3.55609	0.0325417	5.79617	0.00384078	0.569679	0.0982853	24.7118	0.140509	32.5161	1.85483	654.995	123.839	24.7118	0.140509	NA
Spot 67	637.394	1540.49	1.92923	10.7497	6.44209	0.0442709	12.4392	0.00384084	0.51583	0.0414679	24.7122	0.127229	43.9853	5.35467	1283.17	243.012	24.7122	0.127229	NA
Spot 106	1010	2513.55	2.21932	14.3546	4.34717	0.0337597	6.45481	0.00384199	0.574989	0.0890791	24.7196	0.141863	33.7132	2.14039	732.692	136.314	24.7196	0.141863	NA
Spot 82	366.207	859.562	2.89626	8.30307	10.8705	0.0552065	18.0507	0.00384305	0.555378	0.0307677	24.7264	0.137062	54.5632	9.58936	1699.99	335.178	24.7264	0.137062	NA
Spot 7	359.909	801.772	2.41695	7.8619	7.60813	0.0584676	12.2376	0.00384329	0.606977	0.0495991	24.728	0.149805	57.6963	6.86392	1804.91	223.097	24.728	0.149805	NA
Spot 63	1060.49	1164.49	2.12935	13.1433	4.80363	0.0336407	7.34748	0.00384567	0.595804	0.0810896	24.7433	0.147139	33.5962	2.42809	723.129	155.551	24.7433	0.147139	NA
Spot 105	586.802	1568.12	1.92607	10.3861	6.33096	0.0461844	11.723	0.00384606	0.643488	0.054891	24.7458	0.158931	45.8442	5.25485	1362.51	226.247	24.7458	0.158931	NA
Spot 27	905.151	949.408	2.81806	10.8315	4.7203	0.0409138	12.8328	0.00384621	0.74137	0.0577714	24.7467	0.183113	40.7158	5.12166	1125.08	256.359	24.7467	0.183113	NA
Spot 5	470.281	1102.29	2.04342	9.33537	6.45596	0.0501715	9.52708	0.00384645	0.588581	0.0617798	24.7482	0.145384	49.7065	4.62157	1520.12	179.71	24.7482	0.145384	NA
Spot 64	452.333	1150.65	2.15832	9.49285	8.10732	0.0493277	10.7309	0.00384954	0.58917	0.0549042	24.7681	0.145646	48.8904	5.1221	1486.55	203.534	24.7681	0.145646	NA
Spot 38	1387.76	3488.01	2.66169	15.7741	3.42206	0.0313536	6.40501	0.00385161	0.604242	0.094339	24.7814	0.149452	31.3471	1.97711	568.581	138.935	24.7814	0.149452	NA
Spot 49	1474.59	2845.17	1.6455	14.1988	3.58159	0.0345966	8.30552	0.00385173	0.488003	0.0587564	24.7821	0.120705	34.5347	2.82007	778.977	174.588	24.7821	0.120705	NA
Spot 54	988.298	2440.16	1.96339	12.3439	4.62185	0.0397827	7.1142	0.00385314	0.539131	0.0757824	24.7912	0.1334	39.6119	2.76381	1065.36	142.83	24.7912	0.1334	NA
Spot 112	707.018	1632.34	1.64207	10.5517	6.59742	0.0456215	7.40287	0.00385441	0.680088	0.0918681	24.7994	0.168334	45.2977	3.27964	1334.66	142.752	24.7994	0.168334	NA
Spot 55	876.243	2092.83	2.7859	13.5844	4.36002	0.0353513	7.29404	0.00385582	0.673626	0.0923529	24.8084	0.166795	35.2752	2.52881	822.01	151.849	24.8084	0.166795	NA
Spot 32	1164.43	2722.58	2.079	14.0298	4.12174	0.0349854	7.46804	0.00385694	0.634252	0.0849288	24.8156	0.157091	34.9163	2.56325	799.597	156.102	24.8156	0.157091	NA
Spot 97	679.174	1570.41	1.2784	11.7085	6.00278	0.0405019	9.0064	0.00385714	0.634269	0.0704243	24.8169	0.157103	40.3139	3.55972	1099.19	180.077	24.8169	0.157103	NA
Spot 109	551.751	1289.8	1.53965	10.3842	6.09976	0.0452961	10.7011	0.00385903	0.627418	0.0586313	24.829	0.155482	44.9817	4.70849	1318.48	207.629	24.829	0.155482	NA
Spot 108	451.431	1186.49	2.29087	9.57492	8.70645	0.0492938	15.1476	0.00386707	0.62198	0.0410612	24.8807	0.154455	48.8576	7.22566	1476.64	288.714	24.8807	0.154455	NA
Spot 19	892.476	2423.36	2.34394	13.2581	4.26704	0.0369675	5.43592	0.00386784	0.487434	0.0896691	24.8856	0.121067	36.859	1.9677	908.223	111.593	24.8856	0.121067	NA
Spot 76	532.009	1413.98	1.96862	11.3104	6.46041	0.0418167	8.86826	0.00388143	0.604132	0.0681229	24.9729	0.150577	41.5962	3.61434	1150.38	176.019	24.9729	0.150577	NA
Spot 89	976.605	2637.09	2.07523	13.0002	4.21682	0.0382207	7.98168	0.0038856	0.640765	0.0802795	24.9997	0.159879	38.0854	2.98356	967.183	162.629	24.9997	0.159879	NA
Spot 34	717.087	1545.85	2.35191	10.6608	6.44382	0.045278	8.15672	0.00388817	0.747196	0.0916049	25.0162	0.186558	44.9641	3.58759	1303.11	158.025	25.0162	0.186558	NA
Spot 12	3292.21	6883.96	2.85277	18.2462	1.81694	0.0281571	2.87145	0.00388851	0.574225	0.199977	25.0184	0.143383	28.1951	0.798473	307.981	64.0674	25.0184	0.143383	NA
Spot 111	411.27	1086.56	2.82419	8.28105	10.4175	0.0578692	12.284	0.00389321	0.639848	0.052088	25.0485	0.159962	57.1221	6.82326	1762.63	225.09	25.0485	0.159962	NA
Spot 57	816.721	322.305	1.78847	9.73295	5.57703	0.0307586	73.2058	0.00389558	0.610934	0.00834543	25.0637	0.152825	30.761	22.1847	501.772	NA	25.0637	0.152825	NA
Spot 15	769.466	1883.38	2.59652	11.8055	4.81518	0.0413431	8.43855	0.00389603	0.573722	0.0679883	25.0666	0.143534	41.1345	3.40179	1120.24	168.206	25.0666	0.143534	NA
Spot 85	1018.6	2414.28	1.6345	13.3071	4.02419	0.0370851	5.34335	0.00389631	0.654696	0.122525	25.0685	0.163803	36.9741	1.94012	899.646	109.45	25.0685	0.163803	NA
Spot 6	734.204	1552.86	1.82526	11.5855	5.64389	0.0414984	11.8819	0.00389721	0.583562	0.0491135	25.0742	0.146039	41.2859	4.8072	1127.07	237.267	25.0742	0.146039	NA
Spot 84	727.645	1780.98	2.20634	12.1697	5.56732	0.039774	6.62371	0.00389937	0.596447	0.0900473	25.088	0.149346	39.6033	2.57272	1040.85	133.299	25.088	0.149346	NA
Spot 21	1853.39	4085.59	2.07219	15.8493	2.99775	0.0319357	3.4727	0.00390069	0.547018	0.15752	25.0966	0.137016	31.92	1.09124	581.027	74.5115	25.0966	0.137016	NA
Spot 118	477.254	1170.85	1.92642	9.99754	7.82381	0.0471752	9.22512	0.00390211	0.80794	0.0875805	25.1057	0.202444	46.8054	4.21987	1375.52	177.086	25.1057	0.202444	NA
Spot 13	748.264	1772.66	2.5574	12.0471	5.9969	0.0402336	11.0625	0.00390242	0.629106	0.0568685	25.1077	0.157647	40.0521	4.34452	1062.46	222.828	25.1077	0.157647	NA
Spot 56	1387.55	3272.72	1.7272	14.815	3.66498	0.0339071	4.85291	0.00391245	0.560064	0.115408	25.1721	0.140705	33.8579	1.616	703.356	102.65	25.1721	0.140705	NA
Spot 65	436.576	1120.8	2.31483	9.28811	6.85765	0.0512461	8.99596	0.00391388	0.769465	0.0855344	25.1812	0.193383	50.745	4.45284	1527.31	169.191	25.1812	0.193383	NA
Spot 94	908.143	2307.35	2.50176	12.6823	5.33977	0.0391116	7.2246	0.00391407	0.491612	0.068047	25.1825	0.123559	38.9563	2.76114	999.23	146.586	25.1825	0.123559	NA
Spot 99	3278.07	7669.01	2.38633	17.8717	2.00933	0.0291375	2.9273	0.00391755	0.703431	0.2403	25.2048	0.176952	29.1629	0.841542	368.652	64.0187	25.2048	0.176952	NA
Spot 77	845.64	2446.18	2.45167	13.5601	4.56694	0.0365471	5.68101	0.00391779	0.565031	0.0994597	25.2064	0.142146	36.4473	2.03386	858.035	117.444	25.2064	0.142146	NA
Spot 45	435.343	1083.56	3.56724	8.46506	9.01094	0.0567979	10.0805	0.00391813	0.484314	0.0480445	25.2085	0.12185	56.0933	5.5012	1716.68	185.577	25.2085	0.12185	NA
Spot 9	672.65	1083.77	1.67905	11.73	5.05849	0.038991	12.274	0.00392376	0.724826	0.059054	25.2447	0.182622	38.8385	4.67704	987.967	250.179	25.2447	0.182622	NA
Spot 120	343.999	854.04	2.18065	8.06482	10.7547	0.0583415	14.2424	0.00393117	0.563417	0.039559	25.2923	0.142222	57.5754	7.97214	1759.75	261.574	25.2923	0.142222	NA
Spot 107	895.328	1930.24	3.16927	12.6436	5.42186	0.0387461	7.01682	0.00393182	0.515729	0.0734989	25.2965	0.130206	38.5991	2.6576	970.937	142.932	25.2965	0.130206	NA
Spot 91	1631.2	3087.29	2.15596	16.0057	2.73995	0.031246	4.17232	0.00393197	0.694031	0.166342	25.2974	0.175228	31.2411	1.28363	515.876	90.3867	25.2974	0.175228	NA
Spot 86	672.69	2027.7	1.64615	10.8746	5.24422	0.0460225	6.19132	0.00393552	0.665341	0.107464	25.3202	0.168135	45.6871	2.76595	1311.27	119.527	25.3202	0.168135	NA
Spot 11	580.872	1477.39	3.1289	10.8894	5.87589	0.0445359	7.46909	0.00393616	0.581409	0.077842	25.3243	0.146949	44.2429	3.2336	1246.95	146.004	25.3243	0.146949	NA
Spot 115	447.021	1164.24	2.21912	11.9196	6.56182	0.0387644	10.8111	0.00394367	0.531417	0.0491547	25.3725	0.134569	38.617	4.09655	965.772	221.069	25.3725	0.134569	NA
Spot 52	1356.54	3107.49	2.24119	15.2889	2.70869	0.0329543	3.51412	0.00394877	0.479081	0.13633	25.4053	0.121472	32.9217	1.13836	622.445	75.0905	25.4053	0.121472	NA
Spot 1	4667.94	12840	2.29748	19.3322	1.19336	0.0275305	1.85275	0.00394979	0.483787	0.261119	25.4118	0.122697	27.5761	0.50404	220.445	41.4028	25.4118	0.122697	NA
Spot 43	373.72	203.516	2.54404	6.45293	9.65986	0.0468206	17.3569	0.00396578	0.559943	0.0322606	25.5145	0.142584	46.4615	7.88271	1329.75	338.253	25.5145	0.142584	NA
Spot 36	1487.95	3193.44	0.987102	14.3532	3.60679	0.0355398	5.32848	0.0039676	0.503304	0.0944556	25.5262	0.12822	35.46	1.85687	773.214	111.7	25.5262	0.12822	NA
Spot 104	2534.86	6728.51	3.37948	17.4284	2.57007	0.0302229	4.43282	0.00398186	0.642133	0.144859	25.6178	0.164174	30.2332	1.32043	414.185	98.091	25.6178	0.164174	NA
Spot 48	503.697	446.875	1.86339	9.13997	7.34076	0.0428741	21.0667	0.00402044	0.611513	0.0290275	25.8655	0.157854	42.6262	8.79429	1130.06	423.978	25.8655	0.157854	NA
Spot 46	867.513	1222.97	1.30976	12.2821	4.90152	0.0393093	17.4606	0.00410577	0.570785	0.03269	26.4133	0.150455	39.1495	6.70571	911.773	361.865	26.4133	0.150455	NA
Spot 40	795.254	2239.65	1.99279	12.1983	5.27633	0.044533	7.2688	0.00428534	0.473019	0.0650753	27.566	0.130114	44.2401	3.14669	1078.36	145.757	27.566	0.130114	NA
Spot 58	1873.83	6006.06	1.9829	17.4042	2.22107	0.0327829	4.566	0.00433743	0.773531	0.169411	27.9004	0.215352	32.7533	1.47165	404.74	100.786	27.9004	0.215352	NA
Spot 116	156.174	214.278	2.01543	4.6234	13.6573	0.102539	29.9849	0.00475992	0.543262	0.0181178	30.6116	0.165907	99.1172	28.3231	2415.34	522.113	30.6116	0.165907	NA
ELM18DVTC-8
Spot 105	280.423	4409.77	1.50926	16.6699	2.54991	0.105873	3.37377	0.013539	0.540094	0.160086	86.6925	0.465087	102.183	3.27965	480.446	73.6013	86.6925	0.465087	NA
Spot 55	440.585	2110.22	1.14365	15.6087	2.50902	0.106559	11.4209	0.0135892	0.660084	0.0577961	87.0115	0.57049	102.813	11.1677	486.564	252.372	87.0115	0.57049	NA
Spot 9	392.176	3798.98	1.59739	16.8744	2.73003	0.105215	5.41437	0.0137853	0.583879	0.107839	88.2586	0.511812	101.579	5.23375	426.594	120.124	88.2586	0.511812	NA
Spot 54	58.7908	850.428	1.73744	7.46703	8.44987	0.224166	11.7869	0.0138342	0.563583	0.0478145	88.5695	0.495749	205.371	21.9192	1918.85	211.912	88.5695	0.495749	NA
Spot 120	214.906	3072.67	2.2733	14.532	4.36395	0.123132	7.1178	0.0139741	0.564235	0.079271	89.4595	0.501276	117.907	7.92363	738.512	150.316	89.4595	0.501276	NA
Spot 148	1066.99	2237.98	4.39073	17.1511	2.11822	0.0992087	10.7359	0.013975	0.592045	0.0551462	89.4649	0.526014	96.0456	9.83903	262.694	246.726	89.4649	0.526014	NA
Spot 30	473.83	6749.8	3.22398	17.9411	1.89622	0.103596	2.52106	0.0140298	0.599128	0.23765	89.8133	0.534366	100.091	2.40297	352.356	55.3198	89.8133	0.534366	NA
Spot 11	96.0663	1475.56	2.01571	11.2322	6.65862	0.15408	9.83069	0.0140691	0.528441	0.0537542	90.0631	0.472622	145.507	13.3275	1182.86	194.456	90.0631	0.472622	NA
Spot 97	267.667	4452.12	1.97285	15.1338	2.88802	0.123081	3.69505	0.0142132	0.548664	0.148486	90.9793	0.495665	117.862	4.11182	701.676	77.8174	90.9793	0.495665	NA
Spot 93	82.6837	1142.06	1.8821	10.2355	7.82961	0.167391	10.1497	0.0142402	0.680846	0.0670802	91.1505	0.616228	157.152	14.7785	1321.31	196.695	91.1505	0.616228	NA
Spot 80	923.476	13511.3	5.78267	19.4276	1.27383	0.0989366	1.54068	0.0143083	0.61059	0.396312	91.5835	0.555247	95.7943	1.4084	201.936	32.8609	91.5835	0.555247	NA
Spot 130	1558.62	25973.3	2.30418	20.0032	0.857516	0.107599	1.11081	0.0158545	0.51025	0.45935	101.403	0.513361	103.766	1.09571	158.374	23.0821	101.403	0.513361	NA
Spot 39	605.01	12541.7	2.65585	18.6469	1.38338	0.123805	1.80265	0.0171263	0.622214	0.345166	109.468	0.675377	118.516	2.01646	304.177	38.5505	109.468	0.675377	NA
Spot 122	774.732	14667.4	2.78244	19.4455	1.28432	0.118746	1.93414	0.0171346	0.55579	0.287358	109.521	0.603565	113.935	2.08452	207.181	42.968	109.521	0.603565	NA
Spot 149	2129.7	45227.2	3.17377	20.0714	0.735297	0.156549	1.08753	0.0230507	0.63041	0.57967	146.908	0.915647	147.678	1.49472	160.062	20.7195	146.908	0.915647	NA
Spot 143	436.865	10913.9	3.08824	18.6341	1.29084	0.167938	1.94898	0.023394	0.611794	0.313905	149.07	0.901539	157.628	2.84555	288.271	42.3072	149.07	0.901539	NA
Spot 37	939.388	7096.14	2.24386	19.1058	0.998025	0.168553	1.40299	0.0243324	0.68333	0.487052	154.979	1.04639	158.163	2.05482	206.109	28.4465	154.979	1.04639	NA
Spot 125	99.0574	2635.11	1.60445	13.0882	4.42089	0.240323	6.31432	0.0246371	0.519741	0.0823115	156.896	0.805608	218.685	12.4233	950.079	128.9	156.896	0.805608	NA
Spot 110	255.31	7333.99	1.49752	17.6389	1.82778	0.18714	3.34296	0.0248015	0.609469	0.182314	157.93	0.950842	174.186	5.35094	400.988	73.646	157.93	0.950842	NA
Spot 12	520.073	12967.4	1.68372	19.0374	1.22539	0.175975	2.04858	0.0248278	0.595372	0.290626	158.095	0.929807	164.591	3.1127	259.071	45.0153	158.095	0.929807	NA
Spot 40	119.634	3435.32	1.42411	14.1145	4.6397	0.228685	5.41084	0.0248958	0.651828	0.120467	158.523	1.0207	209.113	10.226	825.943	112.144	158.523	1.0207	NA
Spot 70	154.309	3826.73	1.06303	16.2286	2.60218	0.197904	5.48528	0.0249413	0.600776	0.109525	158.81	0.942436	183.352	9.20182	512.609	119.907	158.81	0.942436	NA
Spot 71	97.1297	3006.11	1.84986	13.6595	3.90096	0.234363	4.16898	0.0249539	0.637534	0.152924	158.889	1.00059	213.794	8.03738	872.096	85.3766	158.889	1.00059	NA
Spot 146	754.753	18352.6	15.2604	19.52	1.49584	0.173145	1.76321	0.0250264	0.574949	0.326082	159.345	0.904921	162.145	2.64236	203.232	38.7006	159.345	0.904921	NA
Spot 121	333.434	8680.37	1.8261	17.5928	1.79448	0.190806	2.36181	0.0251687	0.696178	0.294765	160.24	1.1018	177.316	3.84261	411.514	50.4716	160.24	1.1018	NA
Spot 109	453.23	12791.2	1.31716	18.261	1.53917	0.187447	1.81678	0.0253438	0.616191	0.339167	161.34	0.981828	174.448	2.91204	356.031	38.5938	161.34	0.981828	NA
Spot 74	167.46	4764.06	1.30918	16.6087	2.52115	0.19884	4.51117	0.0253469	0.521142	0.115523	161.36	0.830477	184.144	7.59748	487.476	98.9348	161.36	0.830477	NA
Spot 133	584.162	19577.2	1.66027	19.1722	1.12536	0.178938	1.40244	0.0253593	0.536257	0.382375	161.438	0.854973	167.146	2.16135	248.745	29.8397	161.438	0.854973	NA
Spot 16	453.443	13755.1	2.0682	18.8605	1.39278	0.181837	1.96083	0.0253839	0.543646	0.277253	161.593	0.867573	169.64	3.06335	283.434	43.1043	161.593	0.867573	NA
Spot 13	301.727	7824.15	1.97839	17.846	1.79548	0.190046	2.83205	0.0254468	0.7302	0.257835	161.988	1.1681	176.668	4.59228	377.921	61.5579	161.988	1.1681	NA
Spot 21	542.822	15526.8	0.552485	19.1583	1.16825	0.179923	1.32797	0.0254614	0.521315	0.392564	162.08	0.834413	167.994	2.05614	252.163	28.1086	162.08	0.834413	NA
Spot 140	199.639	4670.36	1.62487	16.8077	2.7485	0.197731	4.68418	0.0255735	0.581258	0.12409	162.785	0.934353	183.205	7.85213	455.391	103.19	162.785	0.934353	NA
Spot 116	135.393	4065.21	1.65895	15.7169	2.70791	0.211647	3.85664	0.0255789	0.618966	0.160494	162.818	0.99517	194.933	6.84039	603.941	82.4013	162.818	0.99517	NA
Spot 75	583.802	11912.9	1.0648	19.2189	1.06456	0.178448	1.90738	0.0255885	0.510167	0.26747	162.879	0.820545	166.724	2.93271	221.64	42.5374	162.879	0.820545	NA
Spot 82	373.916	11429.6	2.5856	18.2325	1.52229	0.188069	2.88298	0.0255903	0.607145	0.210596	162.89	0.976589	174.98	4.63394	341.661	63.7899	162.89	0.976589	NA
Spot 44	201.442	4720.73	1.35895	16.5304	2.68865	0.202122	5.19343	0.0256124	0.448548	0.0863683	163.029	0.722095	186.92	8.86668	500.624	113.994	163.029	0.722095	NA
Spot 79	163.09	4076.9	1.32997	15.7745	3.23563	0.210393	3.79897	0.0256126	0.654215	0.172209	163.03	1.0532	193.882	6.70511	588.244	81.1928	163.03	1.0532	NA
Spot 111	75.7437	1998.66	1.97427	12.0122	4.41872	0.269	7.01907	0.0256136	0.62986	0.0897355	163.036	1.01402	241.894	15.1089	1099.51	140.008	163.036	1.01402	NA
Spot 141	278.036	7156.92	2.18948	18.5736	1.90544	0.182156	2.24873	0.0256371	0.539277	0.239814	163.184	0.86897	169.914	3.51834	264.676	50.1107	163.184	0.86897	NA
Spot 87	341.372	6414.37	1.98577	17.9123	1.56229	0.188461	4.44927	0.0256493	0.56075	0.126032	163.261	0.903991	175.316	7.16412	341.171	99.9691	163.261	0.903991	NA
Spot 36	376.577	10089.6	1.8201	19.0352	1.3783	0.180823	1.79332	0.0256895	0.619747	0.345587	163.514	1.00063	168.768	2.78841	243.11	38.7766	163.514	1.00063	NA
Spot 23	135.273	1301.22	2.37807	13.4499	3.23659	0.22413	6.61654	0.0257218	0.606386	0.091647	163.717	0.980255	205.341	12.3014	714.894	140.094	163.717	0.980255	NA
Spot 31	390.912	10668.6	1.97754	18.3686	1.43827	0.188259	1.83979	0.0257355	0.515364	0.280121	163.803	0.833545	175.143	2.95968	331.151	40.0372	163.803	0.833545	NA
Spot 86	537.629	14324.2	1.75364	18.8723	1.33098	0.183806	1.70187	0.0257742	0.85812	0.504222	164.046	1.38995	171.33	2.68309	273.102	33.688	164.046	1.38995	NA
Spot 84	364.341	8734.95	2.28486	18.6097	1.65653	0.18455	2.54107	0.0258325	0.729108	0.28693	164.412	1.18359	171.968	4.01984	277.232	55.7358	164.412	1.18359	NA
Spot 119	550.617	13593.4	2.89074	19.2839	0.956024	0.180448	2.05913	0.0258569	0.462475	0.224598	164.566	0.751444	168.446	3.1961	223.303	46.4037	164.566	0.751444	NA
Spot 132	661.454	18436	1.53017	19.2577	1.20172	0.181823	1.50275	0.0258976	0.590429	0.392899	164.822	0.960821	169.628	2.34755	237.183	31.8578	164.822	0.960821	NA
Spot 7	321.771	9532.19	1.58743	18.675	1.43055	0.185933	2.53991	0.025961	0.491491	0.193507	165.22	0.801723	173.153	4.04339	282.953	57.0223	165.22	0.801723	NA
Spot 72	531.164	4188.19	1.40572	17.967	1.36581	0.185848	5.68613	0.025963	0.630412	0.110869	165.232	1.02841	173.08	9.04872	281.742	129.393	165.232	1.02841	NA
Spot 34	512.769	12484.3	1.55399	18.7704	1.33594	0.186471	2.63477	0.0259724	0.670949	0.254651	165.291	1.09492	173.613	4.20464	288.544	58.2519	165.291	1.09492	NA
Spot 129	328.509	9639.37	2.02769	17.7589	1.82551	0.195541	2.18867	0.0259897	0.53534	0.244596	165.4	0.874189	181.346	3.63483	394.53	47.5874	165.4	0.874189	NA
Spot 91	504.143	14891.2	1.91017	18.9823	1.11747	0.18487	1.47679	0.0260185	0.610777	0.413583	165.581	0.998454	172.243	2.33963	264.71	30.8405	165.581	0.998454	NA
Spot 77	266.375	7677.58	1.20471	17.8734	1.96019	0.194266	2.52722	0.0261843	0.534193	0.211376	166.623	0.878682	180.263	4.17417	363.041	55.7135	166.623	0.878682	NA
Spot 43	245.361	7271.08	2.26642	17.7577	2.071	0.196216	3.2886	0.0262545	0.55624	0.169142	167.064	0.917337	181.919	5.47734	379.5	72.8847	167.064	0.917337	NA
Spot 150	302.073	8628.53	1.71393	17.9655	1.67422	0.196551	2.43252	0.0265435	0.524365	0.215564	168.879	0.874044	182.204	4.05727	358.684	53.6011	168.879	0.874044	NA
Spot 25	273.317	8201.9	0.839832	17.3283	1.98586	0.204859	2.54382	0.0265912	0.551175	0.216672	169.178	0.920339	189.23	4.39175	447.378	55.2064	169.178	0.920339	NA
Spot 95	219.472	5644.15	2.75283	17.1003	2.04456	0.205287	4.93069	0.0266465	0.600528	0.121794	169.526	1.00478	189.59	8.52744	447.396	108.796	169.526	1.00478	NA
Spot 22	227.658	5972.61	0.924751	18.1468	2.02759	0.193625	2.57765	0.026671	0.557161	0.216151	169.679	0.933053	179.718	4.24571	313.878	57.2572	169.679	0.933053	NA
Spot 10	250.659	7415.67	1.89343	17.8611	1.88336	0.199102	3.20299	0.026762	0.577175	0.180199	170.251	0.969784	184.366	5.40018	369.268	70.9893	170.251	0.969784	NA
Spot 90	925.077	22227.9	1.88784	19.5774	0.880321	0.185733	1.16873	0.0268022	0.583033	0.49886	170.503	0.98106	172.982	1.85887	206.994	23.4935	170.503	0.98106	NA
Spot 131	332.593	11102	1.85441	17.9519	1.70063	0.200466	2.0459	0.0268433	0.584707	0.285794	170.761	0.985345	185.52	3.46902	377.813	44.0827	170.761	0.985345	NA
Spot 112	581.378	16035.7	1.52989	19.2014	1.1933	0.189612	1.75544	0.0268658	0.680187	0.387473	170.903	1.14718	176.298	2.84105	249.286	37.2483	170.903	1.14718	NA
Spot 49	314.249	9011.72	1.81398	17.8961	1.73563	0.200228	2.32388	0.0268669	0.613474	0.263987	170.909	1.03471	185.319	3.93648	373.167	50.4436	170.909	1.03471	NA
Spot 8	360	9582.26	1.60341	18.7884	1.34722	0.191351	2.68697	0.0268754	0.563468	0.209704	170.963	0.950661	177.781	4.38215	269.416	60.252	170.963	0.950661	NA
Spot 92	187.264	1590.23	2.63658	15.1365	2.55714	0.210242	8.35416	0.0268822	0.632406	0.0756996	171.005	1.06723	193.756	14.7371	480.73	184.318	171.005	1.06723	NA
Spot 102	321.895	9481.39	1.88285	18.5008	1.5435	0.195317	2.22581	0.0269947	0.582107	0.261526	171.712	0.98635	181.156	3.69298	306.186	48.9553	171.712	0.98635	NA
Spot 144	789.213	25439.4	0.738572	19.4679	0.89122	0.188459	1.14618	0.0270466	0.445747	0.388896	172.037	0.756709	175.314	1.84552	219.737	24.4247	172.037	0.756709	NA
Spot 57	719.515	20224.5	0.983914	19.3877	0.927387	0.189043	1.45062	0.0270966	0.491747	0.33899	172.351	0.836302	175.812	2.34179	222.605	31.5436	172.351	0.836302	NA
Spot 28	211.323	6375.43	2.65701	17.0194	2.31579	0.211051	3.07985	0.0271141	0.457742	0.148625	172.461	0.77896	194.434	5.44989	470.223	67.4443	172.461	0.77896	NA
Spot 123	192.444	5927.06	2.46682	16.4908	2.81311	0.216776	3.17354	0.0271185	0.494623	0.155858	172.488	0.841855	199.223	5.74089	528.856	68.7095	172.488	0.841855	NA
Spot 47	117.23	3690.93	1.69772	15.3628	2.804	0.228287	5.20037	0.0271515	0.723733	0.13917	172.696	1.23326	208.783	9.81429	638.539	110.829	172.696	1.23326	NA
Spot 51	425.53	13573	1.58596	18.7737	1.38834	0.19586	1.67971	0.027323	0.528257	0.314494	173.772	0.905701	181.617	2.79338	284.963	36.4668	173.772	0.905701	NA
Spot 76	382.199	12937.8	1.86255	18.8099	1.39687	0.195396	1.9888	0.027356	0.538757	0.270895	173.979	0.92479	181.223	3.30086	276.783	43.8471	173.979	0.92479	NA
Spot 48	227.439	7232.65	2.20111	17.1243	2.38467	0.21205	4.03052	0.0273737	0.55102	0.136712	174.09	0.946433	195.272	7.16006	459.626	88.5893	174.09	0.946433	NA
Spot 18	371.311	11719.3	1.78762	18.3646	1.58821	0.200953	2.47591	0.0273824	0.575448	0.232419	174.145	0.9887	185.932	4.20665	338.405	54.5491	174.145	0.9887	NA
Spot 103	331.48	6862.57	1.72832	18.399	1.8319	0.197017	3.23021	0.0273866	0.538798	0.1668	174.171	0.925867	182.599	5.39844	293.09	72.7389	174.171	0.925867	NA
Spot 41	448.02	13509.3	0.846295	18.8632	1.42907	0.196	2.33658	0.0273906	0.92005	0.393759	174.196	1.58123	181.736	3.88811	280.955	49.1573	174.196	1.58123	NA
Spot 17	393.736	10018.3	2.04958	18.4166	1.43272	0.199823	1.77348	0.027429	0.520888	0.293709	174.437	0.896439	184.976	2.99907	321.805	38.4934	174.437	0.896439	NA
Spot 81	139.106	4488.02	2.06557	14.5089	3.57823	0.247574	5.16861	0.0274528	0.611124	0.118238	174.587	1.05262	224.604	10.415	787.402	107.82	174.587	1.05262	NA
Spot 14	359.486	11327.6	1.69376	18.4587	1.54032	0.200348	2.55096	0.0274775	0.554903	0.217527	174.741	0.956621	185.42	4.32328	323.729	56.5525	174.741	0.956621	NA
Spot 115	347.823	11580.2	1.83626	18.4954	1.54851	0.199946	2.10956	0.0274839	0.848251	0.402099	174.781	1.46267	185.08	3.56922	318.616	43.9074	174.781	1.46267	NA
Spot 136	251.388	7598.22	2.28588	18.0059	2.11162	0.202551	4.1462	0.0275365	0.559339	0.134904	175.112	0.966283	187.283	7.09119	343.667	92.9817	175.112	0.966283	NA
Spot 64	116.989	3751.44	1.67658	16.0222	2.96748	0.22167	4.91814	0.0275919	0.589423	0.119847	175.459	1.02025	203.298	9.06138	539.838	106.871	175.459	1.02025	NA
Spot 35	204.817	6047.31	1.62854	17.0361	2.78842	0.214204	4.14385	0.0276162	0.745747	0.179965	175.611	1.29194	197.074	7.42296	462.475	90.3914	175.611	1.29194	NA
Spot 53	841.58	26029.2	1.40259	19.8377	0.85742	0.189058	1.33232	0.0276186	0.552073	0.414371	175.626	0.956497	175.825	2.15095	178.481	28.2864	175.626	0.956497	NA
Spot 114	245.246	5882.71	2.08131	17.503	1.89583	0.208232	3.97986	0.0276558	0.55599	0.139701	175.86	0.964548	192.068	6.96469	396.203	88.3702	175.86	0.964548	NA
Spot 88	323.11	10961.3	1.70833	18.4091	1.42316	0.201559	1.69374	0.027677	0.57593	0.340035	175.993	0.999885	186.444	2.88492	321.009	36.1782	175.993	0.999885	NA
Spot 63	252.6	7796.41	2.94757	17.2232	2.03071	0.213616	3.8634	0.0277064	0.527537	0.136547	176.178	0.916817	196.582	6.90492	449.092	85.0678	176.178	0.916817	NA
Spot 117	179.681	5471.2	1.83902	16.0868	2.76178	0.22905	3.59348	0.0279367	0.650458	0.18101	177.622	1.13958	209.414	6.80006	584.104	76.7217	177.622	1.13958	NA
Spot 124	154.333	4571.89	2.6833	15.9064	2.58158	0.229624	4.08752	0.0279889	0.619682	0.151604	177.949	1.08764	209.888	7.75073	585.526	87.729	177.949	1.08764	NA
Spot 104	389.153	6645.89	1.57601	18.514	1.56396	0.201019	3.5623	0.0281243	0.619691	0.173958	178.798	1.09277	185.988	6.05414	278.32	80.3187	178.798	1.09277	NA
Spot 61	1175.86	39777.7	2.02249	19.8446	0.89833	0.19344	1.32841	0.0281876	0.76798	0.57812	179.195	1.35723	179.56	2.18629	184.353	25.2499	179.195	1.35723	NA
Spot 38	289.595	7575.1	1.10777	17.9013	2.0661	0.209229	2.45671	0.0281877	0.606586	0.24691	179.196	1.07201	192.905	4.31618	364.113	53.675	179.196	1.07201	NA
Spot 107	160.945	3443.24	1.858	15.9512	2.31252	0.240286	4.18196	0.0297878	0.616689	0.147464	189.22	1.14994	218.655	8.2267	548.729	90.3738	189.22	1.14994	NA
Spot 134	174.919	5032.88	1.73488	16.2768	2.23211	0.239664	2.93082	0.0298347	0.507545	0.173175	189.514	0.947866	218.146	5.75338	539.584	63.1381	189.514	0.947866	NA
Spot 69	324.129	8773.09	1.53532	18.3542	1.54024	0.216601	2.98857	0.0298783	0.585454	0.195898	189.787	1.09492	199.077	5.40268	310.645	66.7108	189.787	1.09492	NA
Spot 135	243.111	7858.56	1.24689	17.5256	1.74192	0.227894	2.33492	0.0300894	0.488229	0.209099	191.108	0.91935	208.459	4.40024	409.398	51.0813	191.108	0.91935	NA
Spot 145	231.224	7327.57	1.67711	17.1063	2.02443	0.234407	4.03864	0.0302574	0.588738	0.145776	192.159	1.11462	213.83	7.78727	459.781	88.6288	192.159	1.11462	NA
Spot 100	160.435	1400.43	1.4269	13.8808	4.21293	0.262851	14.57	0.0309145	0.410228	0.0281555	196.269	0.793017	236.962	30.8022	662.527	313.606	196.269	0.793017	NA
Spot 126	276.541	9207.31	1.47462	18.1496	1.66813	0.228462	2.16582	0.0310652	0.567252	0.26191	197.212	1.10175	208.928	4.08986	343.188	47.3017	197.212	1.10175	NA
Spot 147	1697.83	21760.6	3.77258	19.4879	0.917255	0.225222	1.53868	0.0324186	0.82376	0.535369	205.668	1.66747	206.247	2.87194	212.848	30.132	205.668	1.66747	NA
Spot 83	1427.49	48576.5	3.48242	19.8156	0.911005	0.226272	1.25756	0.0328681	0.830247	0.660207	208.474	1.70316	207.116	2.35614	191.716	21.9907	208.474	1.70316	NA
Spot 138	2131.38	7187.11	3.41831	18.9389	0.729273	0.23017	1.15015	0.0330527	0.674525	0.586465	209.626	1.39124	210.339	2.1851	218.334	21.5688	209.626	1.39124	NA
Spot 42	695.295	25835.2	3.4221	19.5458	0.921358	0.230596	1.15199	0.0330751	0.587161	0.509693	209.766	1.21184	210.691	2.19188	221.031	22.9109	209.766	1.21184	NA
Spot 27	730.235	15317.7	2.66699	18.8982	1.03285	0.237447	1.79424	0.0331772	0.49587	0.276368	210.403	1.02648	216.328	3.49584	281.334	39.4817	210.403	1.02648	NA
Spot 50	1236.18	34893.1	1.78533	19.66	0.801295	0.231434	1.24507	0.0334008	0.674355	0.541619	211.798	1.40506	211.381	2.37597	206.755	24.2757	211.798	1.40506	NA
Spot 96	1374.67	55370.3	3.66333	19.5721	0.75483	0.238446	1.05442	0.0340348	0.657113	0.623202	215.752	1.39427	217.147	2.06136	232.28	19.0373	215.752	1.39427	NA
Spot 101	1318.11	46292.6	8.08494	19.7246	0.63541	0.239403	0.960465	0.0344836	0.459298	0.478204	218.548	0.986964	217.931	1.88377	211.249	19.5264	218.548	0.986964	NA
Spot 33	989.378	36692.8	3.86426	19.3896	0.83145	0.243536	1.26018	0.0345291	0.596134	0.473055	218.832	1.28264	221.312	2.50592	247.755	25.5384	218.832	1.28264	NA
Spot 142	772.988	24728.7	3.41544	19.5488	0.829028	0.239825	1.1344	0.0345799	0.626365	0.552153	219.148	1.3496	218.277	2.22809	208.898	21.929	219.148	1.3496	NA
Spot 52	743.291	27396.9	6.18828	19.491	0.884824	0.2417	1.17031	0.0346584	0.593677	0.507283	219.638	1.28198	219.812	2.31308	221.695	23.3072	219.638	1.28198	NA
Spot 26	1559.36	31544.3	3.44014	19.4982	0.669508	0.242715	1.04765	0.0346719	0.580351	0.553958	219.722	1.25367	220.641	2.07764	230.437	20.142	219.722	1.25367	NA
Spot 2	1030.66	45771.4	3.32857	19.4708	0.825079	0.245553	1.06615	0.0349691	0.615057	0.576897	221.573	1.33965	222.958	2.13418	237.578	20.0925	221.573	1.33965	NA
Spot 15	1361.68	44896	1.91188	19.5061	0.671808	0.24593	0.966752	0.0350154	0.538914	0.557448	221.862	1.1753	223.264	1.93759	238.093	18.4869	221.862	1.1753	NA
Spot 108	1169.03	38138.6	3.84449	19.5166	0.757323	0.246608	1.11776	0.0351322	0.636798	0.56971	222.589	1.39325	223.817	2.2452	236.723	21.2074	222.589	1.39325	NA
Spot 19	868.812	30196.1	5.14447	19.2361	0.791009	0.249657	1.34573	0.035159	0.544633	0.404712	222.756	1.19248	226.298	2.72987	263.254	28.2517	222.756	1.19248	NA
Spot 1	1789.83	62345.4	3.01487	19.6024	0.796709	0.245912	1.088	0.0351992	0.73629	0.676736	223.006	1.6139	223.25	2.18048	225.845	18.5145	223.006	1.6139	NA
Spot 29	1282.79	9668.66	2.52393	19.1362	0.770237	0.246695	1.08614	0.035272	0.637357	0.586811	223.46	1.39984	223.888	2.18231	228.384	20.324	223.46	1.39984	NA
Spot 78	1023.68	41637.4	4.00628	19.7053	0.715181	0.244494	1.03311	0.0353403	0.557051	0.539198	223.885	1.22575	222.094	2.06088	203.138	20.2054	223.885	1.22575	NA
Spot 68	1061.81	33229.1	4.46528	19.6405	0.706544	0.245298	0.978507	0.0354111	0.532876	0.544581	224.326	1.17482	222.75	1.95711	206.118	19.06	224.326	1.17482	NA
Spot 45	1381.02	4432.77	1.90958	18.4805	0.952212	0.249309	3.12691	0.0357019	0.693901	0.221913	226.136	1.54196	226.015	6.33606	224.725	70.4978	226.136	1.54196	NA
Spot 32	394.523	15986.2	3.78878	18.7623	1.23957	0.258458	1.69493	0.0357946	0.637362	0.37604	226.713	1.41987	233.424	3.53456	301.52	35.7907	226.713	1.41987	NA
Spot 24	560.568	2600.11	3.28987	17.0404	1.93369	0.261688	10.424	0.0358085	0.571372	0.0548133	226.8	1.27334	236.027	21.9565	328.894	236.694	226.8	1.27334	NA
Spot 89	446.055	18930	3.70227	18.8081	1.14267	0.259089	1.46904	0.0359774	0.63645	0.433241	227.851	1.42483	233.932	3.06943	295.477	30.2306	227.851	1.42483	NA
Spot 118	337.668	15098.9	3.43552	18.63	1.34695	0.261158	1.7903	0.0359995	0.623053	0.348015	227.988	1.39566	235.6	3.76437	312.19	38.2065	227.988	1.39566	NA
Spot 4	378.172	15355.2	3.97837	18.7166	1.03862	0.260531	1.53938	0.0360541	0.541754	0.35193	228.328	1.21532	235.095	3.2306	303.296	32.8592	228.328	1.21532	NA
Spot 128	1658.16	69605.1	2.17755	19.5839	0.803445	0.252579	1.10771	0.0361477	0.735349	0.663846	228.911	1.65375	228.669	2.26803	226.181	19.1427	228.911	1.65375	NA
Spot 139	501.013	20042.5	2.68614	19.1412	1.09858	0.258716	1.40157	0.0366191	0.625881	0.446555	231.843	1.42528	233.631	2.92511	251.684	28.865	231.843	1.42528	NA
Spot 65	651.472	25836.8	2.7306	19.4102	1.20214	0.257097	1.91366	0.0367661	1.04853	0.547922	232.756	2.397	232.324	3.97396	227.957	36.9659	232.756	2.397	NA
Spot 113	790.4	28025.1	2.75145	19.6279	0.835965	0.255937	1.06849	0.0368317	0.541591	0.506876	233.165	1.24023	231.388	2.21088	213.396	21.3373	233.165	1.24023	NA
Spot 6	764.981	29008.3	2.89209	19.5157	0.749322	0.257519	1.09629	0.0368593	0.479492	0.437378	233.336	1.09882	232.665	2.27955	225.901	22.7718	233.336	1.09882	NA
Spot 98	1019.61	39078.8	1.43318	19.3668	0.773231	0.271571	1.09917	0.0384806	0.605913	0.551247	243.408	1.44734	243.949	2.38363	249.156	21.1027	243.408	1.44734	NA
Spot 99	297.426	13177.2	2.48267	18.7338	1.26636	0.304544	2.11069	0.0422828	0.540508	0.256081	266.967	1.41351	269.943	5.00321	295.821	46.5818	266.967	1.41351	NA
Spot 58	407.082	12265.6	3.86834	10.637	1.09543	0.56025	1.31864	0.0439224	0.483159	0.366406	277.1	1.31047	451.689	4.80782	1477.88	23.2682	277.1	1.31047	NA
Spot 3	24.101	3765.34	2.01284	12.7922	2.83937	1.81175	4.00077	0.176838	0.58503	0.146229	1049.68	5.66702	1049.71	26.1813	1049.8	79.7892	1049.8	79.7892	99.9883
Spot 67	145.018	29115	2.544	13.1076	0.727542	1.91145	1.00427	0.183727	0.549535	0.547199	1087.3	5.49838	1085.09	6.69483	1080.66	16.8476	1080.66	16.8476	100.614
Spot 56	385.184	69512.9	6.86987	13.0792	0.65436	1.9095	0.914989	0.182529	0.62064	0.678304	1080.78	6.17559	1084.41	6.0975	1091.69	13.4672	1091.69	13.4672	98.9999
Spot 5	67.2912	13454	3.96877	12.0002	1.02673	2.41551	1.72596	0.213171	0.662553	0.383875	1245.69	7.50489	1247.22	12.3947	1249.89	31.1947	1249.89	31.1947	99.6634
Spot 127	87.9211	20292.6	3.03552	11.3224	0.715262	2.85216	0.906323	0.236806	0.516458	0.569839	1370.07	6.37448	1369.38	6.81379	1368.28	14.3366	1368.28	14.3366	100.131
Spot 94	94.0157	23675.7	1.5635	11.3168	0.846556	2.89418	1.21457	0.239219	0.681571	0.561161	1382.63	8.48158	1380.4	9.1659	1376.92	19.3288	1376.92	19.3288	100.415
Spot 137	162.687	49914.3	3.55314	10.8736	0.656239	3.14813	0.900502	0.25025	0.593699	0.659297	1439.76	7.66058	1444.54	6.9394	1451.56	12.8855	1451.56	12.8855	99.1871
Spot 106	194.038	55863.1	3.74769	10.1072	0.641368	3.8307	0.898543	0.281333	0.618384	0.688208	1598.07	8.75257	1599.22	7.2351	1600.72	12.1639	1600.72	12.1639	99.8348
Spot 60	233.853	71219.5	1.97957	9.1677	0.624367	4.80714	0.875239	0.321793	0.59724	0.682373	1798.48	9.37303	1786.15	7.35679	1771.76	11.6801	1771.76	11.6801	101.508
Spot 46	96.6876	30762.2	1.66309	9.15715	0.688631	4.74571	1.00686	0.317422	0.661606	0.657096	1777.13	10.2761	1775.35	8.44438	1773.25	13.8537	1773.25	13.8537	100.219
Spot 66	22.1872	7789.33	6.25038	8.96291	1.16399	4.93256	1.93691	0.327225	0.512799	0.264751	1824.92	8.15019	1807.85	16.3534	1788.2	34.0334	1788.2	34.0334	102.053
Spot 85	195.612	14027.4	6.34851	8.76874	0.623032	4.99982	0.865188	0.32218	0.597946	0.691116	1800.37	9.39264	1819.29	7.32089	1841.02	11.3208	1841.02	11.3208	97.7919
Spot 59	79.8929	26782.9	2.24473	8.64593	0.613746	5.37138	0.846458	0.339983	0.559127	0.660549	1886.59	9.14507	1880.3	7.24595	1873.35	11.4605	1873.35	11.4605	100.706
ELM18DVTC-10
Spot 72	166.965	665.489	1.11953	7.02262	13.6784	0.000180089	16.9589	1.07108e-05	0.589867	0.0347821	0.0690461	0.000407278	0.182843	0.0310055	1984.86	303.913	0.0690461	0.000407278	NA
Spot 23	127.021	238.03	1.1684	5.4222	11.6087	0.0262791	25.4506	0.00148612	0.546446	0.0214709	9.57305	0.0522727	26.3388	6.61726	2074.09	456.143	9.57305	0.0522727	NA
Spot 37	67.5882	186.692	0.621325	4.09721	23.742	0.041216	29.7714	0.00168483	0.485275	0.0163	10.8519	0.0526175	41.0105	11.9667	2628.91	507.585	10.8519	0.0526175	NA
Spot 92	132.245	104.825	0.862652	4.46703	11.9836	0.0209713	70.1324	0.00168537	0.613021	0.00874091	10.8554	0.0664902	21.0737	14.6282	1430.72	1575.19	10.8554	0.0664902	NA
Spot 90	64.4628	180.396	0.934271	5.94654	19.3977	0.0224453	83.4192	0.00180097	0.571971	0.00685659	11.5993	0.0662852	22.5385	18.5964	1433.75	2103.38	11.5993	0.0662852	NA
Spot 34	111.736	294.962	0.808836	4.66416	15.7509	0.0434221	25.1187	0.00183469	0.54164	0.0215632	11.8163	0.0639434	43.1597	10.6144	2573.8	427.222	11.8163	0.0639434	NA
Spot 112	44.2572	146.012	0.874935	4.42168	23.0614	0.0346147	60.2933	0.0018521	0.754254	0.0125097	11.9283	0.0898868	34.5526	20.4852	2171.07	1181.59	11.9283	0.0898868	NA
Spot 125	65.134	148.944	0.565274	5.47905	18.6689	0.0227776	85.5273	0.00187909	0.603604	0.00705744	12.102	0.0729798	22.8686	19.3426	1380.59	NA	12.102	0.0729798	NA
Spot 27	85.8363	216.265	0.62926	4.98011	17.5259	0.0368624	25.9445	0.00190921	0.541592	0.020875	12.2958	0.0665297	36.7561	9.36591	2227.59	457.592	12.2958	0.0665297	NA
Spot 69	65.8223	161.901	0.843996	4.07549	18.0482	0.0443105	26.5359	0.00191768	0.721626	0.0271943	12.3503	0.0890377	44.0238	11.433	2533.63	453.988	12.3503	0.0890377	NA
Spot 91	101.986	139.622	1.00088	3.74705	15.3494	0.047923	51.4642	0.00195323	0.63207	0.0122817	12.579	0.0794307	47.5302	23.9018	2633.81	929.545	12.579	0.0794307	NA
Spot 57	26.4458	119.089	0.804494	3.77307	26.8263	0.0428304	42.8754	0.00196641	0.422715	0.00985916	12.6638	0.0534794	42.5837	17.8822	2434.04	767.34	12.6638	0.0534794	NA
Spot 98	25.5977	135.052	1.13852	3.92632	32.5056	0.0435037	61.3147	0.00196792	0.520172	0.00848365	12.6736	0.0658596	43.239	25.961	2459.14	1174.77	12.6736	0.0658596	NA
Spot 79	75.2079	195.63	0.935724	3.69652	19.1562	0.0583128	29.2554	0.00201425	0.490259	0.0167579	12.9716	0.0635306	57.5478	16.3691	2905.27	486.097	12.9716	0.0635306	NA
Spot 143	50.8273	174.356	0.713492	3.8679	25.3257	0.0523165	41.8899	0.00201607	0.625668	0.014936	12.9833	0.0811508	51.7784	21.1492	2726.53	727.47	12.9833	0.0811508	NA
Spot 33	122.899	279.089	2.07137	4.54204	18.0188	0.0487895	26.8051	0.00201968	0.663162	0.0247402	13.0066	0.0861676	48.3694	12.6622	2607.97	455.553	13.0066	0.0861676	NA
Spot 3	130.935	297.827	1.83395	4.38962	13.1935	0.0527414	16.7608	0.00205337	0.542297	0.0323551	13.2233	0.0716361	52.1883	8.52638	2709.64	278.531	13.2233	0.0716361	NA
Spot 64	67.3103	202.426	1.01287	4.5903	23.753	0.0438453	45.0475	0.00205939	0.543977	0.0120756	13.262	0.0720681	43.5714	19.2149	2395.36	814.361	13.262	0.0720681	NA
Spot 22	396.38	278.468	0.616652	6.83113	10.8014	0.0273853	33.2371	0.00206277	1.08668	0.0326947	13.2838	0.144203	27.4326	8.99597	1553.35	642.158	13.2838	0.144203	NA
Spot 41	300.081	677.998	0.883525	6.01583	14.5099	0.0421639	16.9788	0.00208565	3.97565	0.234154	13.4309	0.533411	41.9346	6.97507	2306.88	285.537	13.4309	0.533411	NA
Spot 86	64.1291	180.288	0.58939	5.05674	25.6347	0.035567	43.575	0.00209244	0.878781	0.0201671	13.4746	0.118289	35.4867	15.1974	2004.22	817.028	13.4746	0.118289	NA
Spot 45	120.535	293.633	0.797786	3.95565	18.3752	0.0624095	25.1869	0.00213168	0.626172	0.024861	13.7271	0.0858636	61.4707	15.0243	2923.46	414.989	13.7271	0.0858636	NA
Spot 83	66.2831	222.274	0.61172	4.16142	18.0273	0.0546742	23.3912	0.00214576	0.622183	0.026599	13.8176	0.0858788	54.0508	12.3131	2696.41	392.261	13.8176	0.0858788	NA
Spot 97	93.7029	190.85	0.810756	4.74794	18.3632	0.0423343	34.5664	0.00216304	0.587694	0.0170019	13.9288	0.0817704	42.1005	14.256	2251.08	617.548	13.9288	0.0817704	NA
Spot 1	63.493	172.047	0.441097	4.04465	18.1198	0.0525578	33.2289	0.00218371	0.574606	0.0172923	14.0617	0.0807115	52.0112	16.8491	2601.82	571.73	14.0617	0.0807115	NA
Spot 77	250.071	512.925	0.654487	5.83647	9.43533	0.0439031	14.5708	0.00218559	1.0852	0.0744775	14.0739	0.152563	43.6276	6.22234	2295.91	251.213	14.0739	0.152563	NA
Spot 32	137.519	295.846	0.767254	4.54706	13.9315	0.0536049	21.0275	0.0021888	0.51434	0.0244604	14.0945	0.0724144	53.0208	10.8633	2630.78	353.738	14.0945	0.0724144	NA
Spot 81	290.505	607.882	1.37231	7.33591	9.92981	0.0343295	12.1435	0.00218969	0.537024	0.0442231	14.1002	0.0756388	34.2726	4.09246	1859.45	219.963	14.1002	0.0756388	NA
Spot 26	114.374	252.92	1.21196	4.12587	14.2566	0.0586473	17.2478	0.00219057	0.54282	0.0314719	14.1059	0.0764859	57.8686	9.70225	2777.82	284.984	14.1059	0.0764859	NA
Spot 29	77.9275	214.244	0.964185	4.05674	20.2116	0.0573006	33.9915	0.00219516	0.614057	0.018065	14.1354	0.0867042	56.5762	18.7072	2736.23	578.548	14.1354	0.0867042	NA
Spot 96	82.6084	233.755	0.555611	5.05377	16.1402	0.0430375	35.916	0.00220312	0.610288	0.0169921	14.1866	0.0864841	42.7853	15.0486	2247.82	643.724	14.1866	0.0864841	NA
Spot 49	130.488	298.886	0.475902	4.54862	14.525	0.0544254	16.5495	0.00221359	0.522573	0.0315764	14.254	0.0744051	53.8112	8.67383	2637.31	276.846	14.254	0.0744051	NA
Spot 20	103.982	274.626	0.739436	5.53907	14.3437	0.0403766	19.9159	0.00221748	0.504349	0.0253239	14.279	0.071936	40.1917	7.84835	2125.51	352.41	14.279	0.071936	NA
Spot 114	333.647	237.625	0.782818	6.4239	8.56454	0.0296471	45.7026	0.00222034	0.515866	0.0112875	14.2974	0.0736736	29.6656	13.3626	1564.13	908.2	14.2974	0.0736736	NA
Spot 15	74.8353	220.181	1.15481	4.69268	16.3992	0.0473065	36.4145	0.00222047	0.619841	0.0170218	14.2982	0.0885281	46.9327	16.7028	2396.5	643.519	14.2982	0.0885281	NA
Spot 147	139.371	318.738	0.633768	4.87298	17.039	0.0508234	19.7021	0.00223151	0.651535	0.0330694	14.3692	0.0935161	50.3366	9.67583	2509.39	334.751	14.3692	0.0935161	NA
Spot 76	367.797	704.63	0.846519	7.77593	9.05121	0.0335715	11.4227	0.00223496	0.526985	0.0461347	14.3914	0.0757561	33.5282	3.76732	1781.79	208.765	14.3914	0.0757561	NA
Spot 30	154.66	353.719	0.563699	5.24228	12.7739	0.0475942	17.4763	0.0022399	0.834918	0.0477744	14.4232	0.120287	47.2116	8.06211	2392	299.576	14.4232	0.120287	NA
Spot 44	53.8016	177.251	0.752519	4.04129	31.6003	0.0550833	41.6424	0.0022536	0.491872	0.0118118	14.5113	0.0712968	54.4446	22.0784	2627.5	729.226	14.5113	0.0712968	NA
Spot 150	134.391	352.599	0.931809	4.97722	13.7034	0.0511784	16.37	0.0022548	0.587024	0.0358598	14.519	0.0851342	50.6796	8.09278	2503.64	277.326	14.519	0.0851342	NA
Spot 58	309.115	817.906	0.702075	6.36625	11.1222	0.043798	11.5315	0.00225671	0.580059	0.0503023	14.5313	0.0841951	43.5254	4.9131	2236.56	199.951	14.5313	0.0841951	NA
Spot 133	176.25	422.441	0.763491	6.54841	15.8176	0.0374998	21.3704	0.00226079	0.542613	0.0253908	14.5575	0.078902	37.3801	7.84319	1960.67	385.921	14.5575	0.078902	NA
Spot 74	283.281	683.868	0.640945	8.45214	8.94334	0.0305406	11.6168	0.00226486	0.590252	0.0508101	14.5837	0.0859836	30.5463	3.49568	1582.55	217.717	14.5837	0.0859836	NA
Spot 55	289.177	634.393	0.71476	7.04015	10.1327	0.0378582	17.1814	0.00227698	0.597701	0.0347878	14.6617	0.0875335	37.7308	6.36378	1964.9	308.679	14.6617	0.0875335	NA
Spot 117	347.239	778.579	0.731465	8.28337	10.1091	0.0321936	16.6491	0.00227863	0.629632	0.0378177	14.6723	0.0922763	32.1737	5.27271	1669.31	309.883	14.6723	0.0922763	NA
Spot 40	109.201	291.529	0.52184	4.60943	20.7397	0.0547032	23.4608	0.00228348	0.474683	0.0202331	14.7035	0.0697154	54.0787	12.3559	2594.04	397.333	14.7035	0.0697154	NA
Spot 131	92.8903	261.031	0.527686	4.48801	16.3514	0.0550079	19.1924	0.00228774	0.633048	0.0329843	14.7308	0.0931469	54.372	10.1612	2600.2	323.046	14.7308	0.0931469	NA
Spot 62	51.8363	161.879	0.855395	3.63757	22.4798	0.0634588	29.9815	0.00229051	0.648756	0.0216385	14.7487	0.0955734	62.4731	18.1678	2833.8	501.871	14.7487	0.0955734	NA
Spot 108	280.73	288.735	0.778393	6.22646	9.24562	0.0357645	38.6185	0.00229376	0.550199	0.014247	14.7696	0.0811692	35.6803	13.5407	1849.55	727.853	14.7696	0.0811692	NA
Spot 126	218.517	385.803	0.568657	5.88611	13.0776	0.0428017	17.4002	0.00229858	0.548924	0.031547	14.8006	0.081151	42.5558	7.25189	2164.66	305.724	14.8006	0.081151	NA
Spot 73	378.49	859.741	0.760336	8.15086	7.59983	0.0337663	13.167	0.00229983	0.500831	0.0380369	14.8087	0.0740813	33.7196	4.36698	1740.07	242.243	14.8087	0.0740813	NA
Spot 87	160.966	414.032	0.86169	4.81315	18.0854	0.0562603	21.7661	0.00230118	0.558924	0.0256786	14.8173	0.0827225	55.5766	11.7723	2627.92	366.585	14.8173	0.0827225	NA
Spot 132	288.938	656.21	0.475664	7.31225	12.38	0.0366757	13.5731	0.00230224	0.496377	0.0365706	14.8241	0.073499	36.5733	4.87584	1888.29	245.325	14.8241	0.073499	NA
Spot 39	275.913	699.414	0.42906	7.56664	10.8277	0.0356901	14.3568	0.00230402	0.508022	0.0353853	14.8356	0.0752814	35.6074	5.02355	1837.7	261.233	14.8356	0.0752814	NA
Spot 47	227.652	686.16	1.31074	5.92373	11.6832	0.0475486	13.2236	0.00230546	0.473968	0.0358426	14.8449	0.0702789	47.1674	6.09464	2341.14	227.166	14.8449	0.0702789	NA
Spot 52	234.545	506.48	0.585287	6.24771	13.5645	0.0426054	22.3237	0.00230847	0.522491	0.0234052	14.8642	0.0775747	42.3646	9.26301	2149.15	395.116	14.8642	0.0775747	NA
Spot 75	179.197	429.393	0.711456	4.78503	15.8023	0.0572688	21.0373	0.00230977	0.66608	0.0316618	14.8726	0.0989491	56.5456	11.571	2651.23	353.152	14.8726	0.0989491	NA
Spot 35	55.996	243.581	0.582949	3.95831	25.1976	0.0647652	27.1178	0.00231019	0.594551	0.0219248	14.8753	0.0883391	63.7196	16.7498	2853.07	450.93	14.8753	0.0883391	NA
Spot 10	113.885	328.426	1.37897	4.85278	16.1531	0.0533086	24.3607	0.0023108	0.593014	0.0243431	14.8792	0.0881341	52.7352	12.5194	2530.94	415.571	14.8792	0.0881341	NA
Spot 54	250.129	579.951	0.349331	6.10255	9.31341	0.0450208	10.3126	0.00231521	0.548747	0.0532115	14.9075	0.0817103	44.7142	4.51115	2239.92	178.593	14.9075	0.0817103	NA
Spot 116	322.396	815.126	0.990787	7.50314	10.3908	0.0371089	15.5315	0.00231922	0.582705	0.0375178	14.9334	0.0869168	36.9974	5.64287	1896.18	280.868	14.9334	0.0869168	NA
Spot 84	258.408	562.308	0.849068	7.25739	9.96748	0.0362961	15.9142	0.00232305	0.534289	0.0335732	14.958	0.0798262	36.2013	5.65971	1853.28	289.405	14.958	0.0798262	NA
Spot 38	219.52	664.339	0.972325	5.9205	13.8148	0.047796	15.9186	0.00232663	0.5621	0.0353109	14.981	0.0841104	47.4071	7.37322	2334.38	274.254	14.981	0.0841104	NA
Spot 48	352.408	886.484	0.406082	7.67502	8.05267	0.0368242	13.5437	0.00232704	1.27773	0.0943414	14.9836	0.191228	36.7187	4.88425	1876.26	244.2	14.9836	0.191228	NA
Spot 59	167.636	374.57	0.686636	4.81244	14.4739	0.0560206	16.376	0.00233148	0.661034	0.0403659	15.0122	0.0991201	55.3462	8.82115	2599.04	274.814	15.0122	0.0991201	NA
Spot 142	239.821	533.503	1.01412	6.52074	15.746	0.0411414	23.1028	0.00233196	0.553889	0.023975	15.0153	0.0830713	40.9378	9.26992	2070.05	412.912	15.0153	0.0830713	NA
Spot 134	727.113	1703.45	0.999784	10.6941	6.08649	0.0272961	10.9204	0.00233264	0.505849	0.0463215	15.0196	0.0758883	27.3444	2.94628	1312.54	212.243	15.0196	0.0758883	NA
Spot 102	100.197	279.72	0.761086	3.83521	16.1759	0.0705364	18.2398	0.00234246	0.630386	0.0345611	15.0828	0.0949688	69.2083	12.2034	2968.87	296.62	15.0828	0.0949688	NA
Spot 127	224.151	657.333	0.759525	5.9871	11.4846	0.0473489	16.2582	0.00234421	0.595636	0.036636	15.0941	0.0898004	46.9738	7.46327	2305.35	281.026	15.0941	0.0898004	NA
Spot 119	184.473	512.695	0.74942	5.90215	13.5783	0.0463034	16.0725	0.00234511	0.588668	0.0366258	15.0998	0.0887838	45.9597	7.22232	2266.27	278.923	15.0998	0.0887838	NA
Spot 121	284.162	648.661	0.901726	6.67722	11.7462	0.0416007	14.0868	0.00234789	0.603498	0.0428413	15.1177	0.0911284	41.3857	5.71277	2077.61	249.106	15.1177	0.0911284	NA
Spot 42	474.299	1319.78	1.40692	10.068	7.57023	0.0286384	13.4531	0.00235034	0.508742	0.0378161	15.1335	0.0769	28.6703	3.80311	1390.58	259.143	15.1335	0.0769	NA
Spot 129	556.189	1363.82	1.04049	10.5238	6.38288	0.0273675	7.14005	0.00235686	0.840909	0.117774	15.1754	0.127461	27.415	1.93126	1297.56	138.009	15.1754	0.127461	NA
Spot 36	193.783	595.299	0.732766	5.61394	12.4958	0.0509072	15.8562	0.00236342	0.527826	0.0332882	15.2176	0.0802277	50.4176	7.79927	2415.14	270.918	15.2176	0.0802277	NA
Spot 109	380.027	554.222	1.27071	8.32581	11.2135	0.0309032	18.0394	0.00237203	0.544862	0.030204	15.273	0.0831181	30.9035	5.49088	1517.9	342.922	15.273	0.0831181	NA
Spot 88	274.885	674.486	0.806627	6.50666	12.7055	0.0437499	13.7996	0.00237386	0.455402	0.033001	15.2847	0.0695246	43.4786	5.87332	2146.67	242.19	15.2847	0.0695246	NA
Spot 5	330.777	725.041	0.808023	8.20191	9.99731	0.0336051	16.003	0.0023755	0.623727	0.0389756	15.2953	0.0952878	33.5612	5.28306	1671.67	297.59	15.2953	0.0952878	NA
Spot 138	254.471	662.648	0.872402	5.99796	13.9203	0.0480215	16.2806	0.00237569	0.611376	0.0375525	15.2965	0.0934084	47.6256	7.57483	2306.66	281.37	15.2965	0.0934084	NA
Spot 137	489.61	1140.95	0.536242	9.92592	7.48439	0.0289153	8.88204	0.00238113	0.591922	0.0666426	15.3315	0.0906427	28.9436	2.53449	1384.06	170.533	15.3315	0.0906427	NA
Spot 80	253.71	592.966	0.921258	6.76826	8.71422	0.0410082	13.6389	0.00238128	0.619132	0.0453945	15.3325	0.0948156	40.8079	5.45545	2027.35	242.459	15.3325	0.0948156	NA
Spot 71	292.102	698.944	0.782393	8.15032	8.53929	0.0337372	11.0109	0.00238145	0.625674	0.0568231	15.3336	0.0958242	33.691	3.64883	1674.3	203.802	15.3336	0.0958242	NA
Spot 124	212.974	527.119	1.51572	6.32453	10.0463	0.0435009	20.0308	0.00238452	0.600005	0.0299541	15.3533	0.0920109	43.2363	8.47898	2128.85	354.308	15.3533	0.0920109	NA
Spot 105	301.32	794.9	0.506156	7.54068	11.1849	0.0378215	16.1624	0.00238507	0.885251	0.0547722	15.3569	0.135785	37.6949	5.98077	1880.03	292.759	15.3569	0.135785	NA
Spot 113	143.727	364.748	0.952526	4.82552	19.9931	0.0566408	23.4863	0.00238531	0.558328	0.0237725	15.3584	0.0856483	55.9423	12.7841	2579.32	398.308	15.3584	0.0856483	NA
Spot 111	265.768	676.441	0.549472	7.55794	11.1356	0.0367173	19.8738	0.00238634	0.498296	0.025073	15.365	0.0764721	36.614	7.14707	1825.5	364.09	15.365	0.0764721	NA
Spot 21	430.214	928.628	0.94017	10.9146	5.90497	0.0250644	18.9124	0.00239135	0.557537	0.0294799	15.3972	0.0857428	25.1362	4.69555	1095.55	381.736	15.3972	0.0857428	NA
Spot 99	275.555	807.746	1.07544	5.8719	10.2404	0.0507065	12.9549	0.00239177	0.588773	0.0454478	15.4	0.0905626	50.2237	6.34824	2388.15	221.339	15.4	0.0905626	NA
Spot 115	460.732	854.749	0.939561	10.587	6.4723	0.0255366	10.761	0.00239381	0.499258	0.0463949	15.4131	0.0768591	25.6039	2.7208	1130.72	214.646	15.4131	0.0768591	NA
Spot 2	421.128	1009.07	0.757996	7.75411	8.65132	0.0380663	10.9276	0.00239829	0.621872	0.0569082	15.4418	0.0959137	37.9343	4.06887	1881.69	197.138	15.4418	0.0959137	NA
Spot 11	145.89	284.957	0.726343	5.30207	15.6533	0.0470994	26.833	0.0023994	0.565679	0.0210815	15.449	0.0872872	46.7318	12.256	2256.19	472.458	15.449	0.0872872	NA
Spot 139	392.19	1190.7	0.709419	7.95645	7.4396	0.0376699	8.29665	0.00240053	0.567626	0.0684163	15.4563	0.0876287	37.5465	3.05822	1861.13	149.739	15.4563	0.0876287	NA
Spot 4	361.733	1073.64	0.98594	7.70644	8.81286	0.0386618	9.46774	0.00240096	0.516559	0.0545599	15.4591	0.0797594	38.5167	3.57837	1907.61	170.164	15.4591	0.0797594	NA
Spot 107	344.047	725.16	0.72965	8.34388	7.99658	0.0332541	9.97611	0.00240439	0.640824	0.0642358	15.4811	0.0990876	33.2163	3.2601	1629.79	185.514	15.4811	0.0990876	NA
Spot 118	234.944	297.262	0.917563	5.38513	12.192	0.0467606	29.2164	0.00240493	0.571443	0.019559	15.4846	0.0883793	46.4033	13.253	2239.74	517.326	15.4846	0.0883793	NA
Spot 110	211.071	561.967	0.775094	6.44636	12.3321	0.0434114	16.0263	0.0024061	0.635509	0.039654	15.4921	0.0983353	43.1492	6.77046	2109.45	282.874	15.4921	0.0983353	NA
Spot 46	173.2	462.266	1.65094	5.23684	12.8666	0.0541337	17.7032	0.00240635	0.656915	0.0371071	15.4937	0.101658	53.5303	9.23137	2488.63	300.728	15.4937	0.101658	NA
Spot 65	180.502	436.981	0.693038	6.02964	10.2936	0.0450106	18.8015	0.00240931	0.458742	0.0243993	15.5127	0.071078	44.7043	8.2229	2170.37	330.666	15.5127	0.071078	NA
Spot 63	580.507	1212.46	0.602224	10.401	5.58535	0.0280561	12.5898	0.00241341	0.623	0.0494847	15.5391	0.096692	28.0954	3.48867	1299.77	245.31	15.5391	0.096692	NA
Spot 25	318.884	739.277	0.931931	8.47407	8.67413	0.0330213	17.0215	0.00241962	0.448407	0.0263436	15.579	0.0697732	32.9875	5.5248	1604.96	319.656	15.579	0.0697732	NA
Spot 70	128.85	357.515	0.769698	5.28022	17.9843	0.0511198	23.9578	0.00242048	0.598728	0.0249909	15.5846	0.0931964	50.623	11.8313	2381.66	414.59	15.5846	0.0931964	NA
Spot 9	659.521	871.686	0.476821	9.81205	6.66425	0.0285777	12.3182	0.00242518	0.477605	0.0387724	15.6148	0.0744866	28.6104	3.4751	1326.06	239.217	15.6148	0.0744866	NA
Spot 141	508.422	1134.12	0.66376	11.5959	6.81494	0.0245193	11.3422	0.00242611	0.50108	0.0441785	15.6208	0.0781777	24.5961	2.75622	1022.2	230.063	15.6208	0.0781777	NA
Spot 31	308.966	742.409	0.797057	7.25413	9.51492	0.039973	13.3676	0.00242915	0.433489	0.0324284	15.6403	0.0677169	39.7977	5.21712	1946.45	239.95	15.6403	0.0677169	NA
Spot 144	256.224	756.438	0.522703	5.72097	11.4326	0.0527645	12.7911	0.00243126	0.599439	0.0468639	15.6539	0.0937215	52.2105	6.50957	2427.92	217.612	15.6539	0.0937215	NA
Spot 128	729.44	2006.24	0.569746	12.0467	5.40553	0.0253054	7.92255	0.00243187	0.600107	0.0757467	15.6578	0.0938496	25.375	1.98543	1081.04	158.728	15.6578	0.0938496	NA
Spot 140	436.283	1261.05	1.44367	10.8862	7.67475	0.0269216	10.5304	0.00243242	0.563557	0.0535173	15.6614	0.0881536	26.9742	2.80309	1203.64	207.743	15.6614	0.0881536	NA
Spot 122	327.44	883.483	0.907972	7.5541	9.85823	0.0390333	15.0536	0.00243277	0.596129	0.0396005	15.6636	0.093262	38.8798	5.74223	1901.14	271.937	15.6636	0.093262	NA
Spot 100	71.3014	174.177	0.671881	4.88098	20.4468	0.0430519	28.702	0.00243603	0.605476	0.0210952	15.6845	0.0948508	42.7994	12.0295	2073.1	517.047	15.6845	0.0948508	NA
Spot 95	612.403	1488.55	0.690488	11.3249	5.11858	0.0263564	9.02815	0.00243664	0.672388	0.0744768	15.6885	0.105359	26.4153	2.35406	1158.28	178.906	15.6885	0.105359	NA
Spot 123	317.588	655.111	1.02814	7.95384	10.2241	0.0351202	19.9095	0.0024447	0.483294	0.0242746	15.7403	0.0759792	35.0485	6.85902	1700.06	370.447	15.7403	0.0759792	NA
Spot 130	1062.33	3027.09	0.41115	14.0482	3.4498	0.0222717	5.20414	0.00244589	0.564283	0.10843	15.748	0.0887547	22.3661	1.15124	807.658	108.333	15.748	0.0887547	NA
Spot 106	264.217	638.856	0.68741	6.87759	9.83432	0.0417859	11.808	0.00244678	0.611584	0.051794	15.7537	0.0962292	41.5662	4.80907	2012.56	209.94	15.7537	0.0962292	NA
Spot 104	98.2185	282.402	0.497596	4.28474	20.724	0.0639463	25.4716	0.00244701	0.560126	0.0219902	15.7552	0.0881413	62.9385	15.5459	2738.07	426.837	15.7552	0.0881413	NA
Spot 103	170.552	426.462	0.589721	6.32416	11.6008	0.0427154	21.7933	0.0024525	0.599119	0.027491	15.7905	0.0944881	42.4717	9.06531	2047.36	389.834	15.7905	0.0944881	NA
Spot 85	451.25	1125.95	0.9458	7.65253	8.61911	0.0400188	9.89104	0.00245305	0.662824	0.0670126	15.794	0.104558	39.8424	3.86453	1930.98	177.182	15.794	0.104558	NA
Spot 68	318.191	839.777	0.596484	7.84131	11.8019	0.0376132	18.01	0.00245559	0.506927	0.0281469	15.8103	0.0800487	37.4911	6.62911	1817.34	329.622	15.8103	0.0800487	NA
Spot 149	245.823	693.894	0.735073	6.80938	9.49911	0.0430907	10.8276	0.00245643	0.569937	0.0526372	15.8157	0.0900293	42.8371	4.5418	2059.99	191.348	15.8157	0.0900293	NA
Spot 89	465.315	1266.81	1.01216	10.1307	7.42672	0.0295809	9.63703	0.00245757	0.466883	0.0484468	15.8231	0.0737846	29.6003	2.81142	1367.06	185.725	15.8231	0.0737846	NA
Spot 94	808.28	1982.74	0.695915	12.2072	6.09462	0.0252481	8.2475	0.00246051	0.565685	0.0685887	15.842	0.0895057	25.3182	2.0623	1052.96	166.026	15.842	0.0895057	NA
Spot 93	286.78	632.528	1.86676	7.72758	9.50518	0.0364343	18.7476	0.00246062	0.576687	0.0307606	15.8427	0.0912505	36.3367	6.69191	1755.58	345.95	15.8427	0.0912505	NA
Spot 135	359.703	917.985	0.732154	7.94187	8.81205	0.0375538	12.5325	0.00246216	0.723873	0.0577596	15.8526	0.114612	37.4329	4.6059	1809.62	228.284	15.8526	0.114612	NA
Spot 43	329.959	828.12	0.708537	7.87423	10.1414	0.0374586	11.2721	0.00246492	0.550596	0.0488457	15.8703	0.0872738	37.3397	4.13256	1802.97	205.431	15.8703	0.0872738	NA
Spot 14	362.248	793.382	0.711169	8.22423	9.17029	0.0353086	15.2321	0.00246507	0.636913	0.0418139	15.8713	0.100962	35.2334	5.27477	1694.63	282.224	15.8713	0.100962	NA
Spot 16	96.3433	267.502	0.654373	4.83439	21.6633	0.0540143	33.3425	0.00246685	0.584772	0.0175383	15.8827	0.0927635	53.4152	17.3513	2442.97	582.682	15.8827	0.0927635	NA
Spot 18	151.103	387.105	0.75246	5.0322	12.8784	0.0564815	13.8489	0.00247284	0.620593	0.0448117	15.9213	0.0986843	55.7892	7.5179	2514.22	233.787	15.9213	0.0986843	NA
Spot 66	239.001	216.389	1.49994	5.55313	10.5292	0.0401461	20.3966	0.0024758	0.558779	0.0273957	15.9403	0.0889609	39.9667	7.99366	1920.14	369.657	15.9403	0.0889609	NA
Spot 136	470.115	1026.88	0.572484	10.4568	6.7096	0.0278541	9.00756	0.00247862	0.62914	0.0698458	15.9585	0.100277	27.8959	2.47854	1233.63	176.61	15.9585	0.100277	NA
Spot 28	82.4843	228.557	0.868295	4.20532	24.4226	0.062926	27.0492	0.00248379	0.55299	0.0204439	15.9917	0.088323	61.9643	16.261	2686.95	456.538	15.9917	0.088323	NA
Spot 13	39.4309	116.246	0.673291	3.27664	21.1456	0.0694572	34.4504	0.00248965	0.842676	0.0244605	16.0294	0.134908	68.1842	22.7222	2845.14	581.218	16.0294	0.134908	NA
Spot 60	201.356	247.755	0.687436	5.05147	11.2687	0.0499542	33.3608	0.00249205	0.604707	0.0181263	16.0448	0.0969034	49.4964	16.1178	2292.3	591.988	16.0448	0.0969034	NA
Spot 8	471.089	1033.92	1.71271	10.3807	8.25147	0.0284928	10.68	0.00250888	0.702751	0.0658006	16.1531	0.113374	28.5266	3.00425	1254.24	209.014	16.1531	0.113374	NA
Spot 78	102.868	322.462	0.628702	5.87832	17.3063	0.0447636	35.2827	0.00252377	0.554938	0.0157284	16.2487	0.0900569	44.4643	15.3508	2079.45	643.062	16.2487	0.0900569	NA
Spot 61	97.3892	307.865	0.531331	4.57148	18.2599	0.0620542	22.9503	0.00252436	0.535991	0.0233544	16.2526	0.0870028	61.1311	13.6166	2636.98	386.811	16.2526	0.0870028	NA
Spot 56	88.6529	65.7351	0.730313	4.06067	12.0414	0.00388967	827.587	0.00253802	0.583348	0.000704877	16.3404	0.0952006	3.94185	32.5702	NA	NA	16.3404	0.0952006	NA
Spot 6	360.989	148.507	0.632569	6.00072	7.98303	0.0244251	24.4826	0.0025404	0.889349	0.0363257	16.3557	0.145275	24.5028	5.92719	920.495	510.308	16.3557	0.145275	NA
Spot 19	131.284	343.103	0.661936	4.88442	20.6713	0.058982	23.4304	0.00255144	0.630697	0.0269179	16.4267	0.103471	58.1896	13.2515	2534.42	399.027	16.4267	0.103471	NA
Spot 53	271.048	729.728	1.02709	7.66839	9.44351	0.0394906	12.2443	0.00256685	0.588076	0.0480287	16.5258	0.0970598	39.3266	4.72322	1825.31	222.681	16.5258	0.0970598	NA
Spot 120	340.091	266.351	0.785357	6.90467	8.04292	0.0328194	24.4443	0.00258957	0.641586	0.0262469	16.6719	0.106826	32.7891	7.8872	1465.68	471.299	16.6719	0.106826	NA
Spot 67	210.274	546.739	1.55603	6.12076	12.9287	0.0498029	15.6925	0.0025954	0.552643	0.0352171	16.7094	0.0922235	49.3501	7.5592	2216.9	273.698	16.7094	0.0922235	NA
Spot 7	68.795	221.343	0.656895	4.89588	21.2705	0.0525029	31.0644	0.00262095	0.777143	0.0250171	16.8736	0.130961	51.9582	15.7358	2291.15	548.799	16.8736	0.130961	NA
Spot 24	305.554	611.994	0.35526	7.35432	11.8515	0.0416544	18.3491	0.00266275	0.581441	0.0316877	17.1423	0.0995403	41.438	7.45058	1855.49	334.359	17.1423	0.0995403	NA
Spot 145	265.263	252.845	0.655396	6.80637	8.58337	0.0336985	45.7593	0.00267355	0.914523	0.0199855	17.2118	0.157196	33.653	15.1481	1455.26	922.049	17.2118	0.157196	NA
Spot 12	171.177	389.059	1.30664	4.77611	14.6646	0.0652779	17.0312	0.00267699	0.569487	0.0334379	17.2339	0.098014	64.2085	10.5973	2623.59	285.39	17.2339	0.098014	NA
Spot 17	74.6169	228.174	1.69813	4.00089	19.8079	0.0778196	30.9471	0.00286938	0.691269	0.0223371	18.4707	0.1275	76.0929	22.6916	2798.98	520.561	18.4707	0.1275	NA
Spot 146	319.941	667.431	0.93531	8.88958	6.5196	0.124871	17.1675	0.00992447	0.941937	0.0548674	63.6619	0.596704	119.479	19.3531	1451.9	328.629	63.6619	0.596704	NA
Spot 148	220.152	2454.7	0.867685	10.2935	4.91959	-0.177021	5.12768	-0.0140913	0.618378	0.120596	NA	-0.569751	NA	-11.1997	1448.92	96.968	NA	-0.569751	NA
Spot 50	236.846	946.306	0.820685	10.5821	8.63336	-0.00545177	18.6714	-0.000498124	0.591224	0.0316648	NA	-0.0189944	NA	-1.03924	1181.59	372.03	NA	-0.0189944	NA
ELM18DVTC-12
Spot 22	443.978	6243.27	0.338003	26.9331	41.1957	0.0102703	41.988	0.00214957	7.50795	0.178812	13.8422	1.03815	10.3751	4.33412	NA	NA	13.8422	1.03815	NA
Spot 21	1049.39	10281.2	0.471392	19.2821	12.8331	0.0150817	13.3278	0.00217352	3.42692	0.257125	13.9962	0.479119	15.1994	2.01067	210.064	NA	13.9962	0.479119	NA
Spot 14	406.315	771.424	0.53761	15.8639	21.1667	0.0131709	29.2019	0.00218722	6.36799	0.218068	14.0843	0.895911	13.2862	3.85456	NA	NA	14.0843	0.895911	NA
Spot 15	205.844	2320.55	0.373979	39.4848	107.887	0.005679	109.237	0.00220454	11.3373	0.103787	14.1958	1.60765	5.75005	6.26349	NA	NA	14.1958	1.60765	NA
Spot 16	292.358	3802.98	0.210274	22.498	37.6255	0.0123713	40.4597	0.00221919	14.0424	0.347071	14.29	2.00443	12.4845	5.02031	NA	NA	14.29	2.00443	NA
Spot 18	1241.83	8424.85	0.82193	20.7812	10.2945	0.0141793	10.5776	0.00222356	1.8587	0.175721	14.3181	0.265835	14.2963	1.50161	10.6575	NA	14.3181	0.265835	NA
Spot 1	648.814	6094.61	1.11842	18.6672	12.2582	0.015693	13.5512	0.00223288	5.313	0.392068	14.378	0.763052	15.8106	2.12595	239.603	NA	14.378	0.763052	NA
Spot 23	931.491	12820.1	0.434975	20.5683	15.8395	0.0146887	16.2192	0.00224906	3.29744	0.203304	14.4821	0.477003	14.8062	2.38403	67.8219	NA	14.4821	0.477003	NA
Spot 12	1027.19	12132.3	0.793433	19.8159	14.806	0.0154557	15.0873	0.00228288	2.72387	0.180541	14.6996	0.399943	15.5734	2.33169	152.736	NA	14.6996	0.399943	NA
Spot 20	695.085	6650.21	0.941622	23.8455	28.2415	0.0125335	28.8182	0.00229489	5.28627	0.183435	14.7768	0.780249	12.6472	3.62212	NA	NA	14.7768	0.780249	NA
Spot 3	595.857	5455.88	0.770586	20.8257	17.4444	0.0142924	18.6004	0.00229643	6.08244	0.327006	14.7868	0.898365	14.4096	2.66131	NA	NA	14.7868	0.898365	NA
Spot 6	265.018	2667.57	0.608462	21.1699	32.0152	0.0131461	33.6977	0.00229675	7.55351	0.224155	14.7888	1.11579	13.2614	4.43976	NA	NA	14.7888	1.11579	NA
Spot 9	610.097	5842.43	1.03879	24.0598	19.0527	0.0123455	19.5897	0.00230339	3.68839	0.188282	14.8316	0.546417	12.4587	2.42572	NA	NA	14.8316	0.546417	NA
Spot 2	827.367	15655.5	0.925176	21.1233	14.06	0.0148814	14.2386	0.00233466	1.94096	0.136317	15.0327	0.291438	14.999	2.11994	9.57068	NA	15.0327	0.291438	NA
Spot 4	105.544	1001.15	0.733876	-1.70531	-1696.76	-0.203719	1696.88	0.0024173	20.4712	0.012064	15.5641	3.18232	NA	NA	NA	NA	15.5641	3.18232	NA
Spot 13	1139.77	1547.67	0.713359	14.3568	27.8673	0.0206286	29.5651	0.00248944	4.35644	0.147351	16.028	0.697383	20.7328	6.06759	607.119	645.199	16.028	0.697383	NA
Spot 11	246.88	676.704	0.437442	12.5362	42.9396	0.0206982	47.0268	0.00258471	6.61032	0.140565	16.6406	1.09858	20.8021	9.68332	532.767	NA	16.6406	1.09858	NA
MR19DV-3
Spot 15	496.705	14272.8	1.45291	21.0341	4.65892	0.0325533	5.70258	0.00509451	3.15045	0.552462	32.758	1.02941	32.5275	1.82551	15.5532	NA	32.758	1.02941	NA
Spot 18	391.025	10554.1	1.87704	24.1264	16.8625	0.0280875	17.7266	0.00510208	5.19093	0.292832	32.8065	1.69864	28.1264	4.91747	NA	NA	32.8065	1.69864	NA
Spot 2	503.783	14350.2	1.60609	21.5197	14.962	0.0321904	15.3567	0.00515633	3.2568	0.212077	33.1545	1.077	32.1706	4.86293	NA	NA	33.1545	1.077	NA
Spot 5	328.812	8527.71	1.69362	20.6327	15.1613	0.0331497	15.4807	0.00516078	2.63429	0.170166	33.183	0.871889	33.1138	5.0436	28.0971	NA	33.183	0.871889	NA
Spot 12	421.714	6718.09	2.64131	19.8003	10.7766	0.0343292	11.36	0.00517375	3.377	0.297272	33.2662	1.1205	34.2724	3.82837	105.322	NA	33.2662	1.1205	NA
Spot 10	178.182	3166.13	2.2992	23.4334	38.8748	0.0270146	39.4329	0.00518247	4.39223	0.111385	33.3221	1.45981	27.0662	10.5324	NA	NA	33.3221	1.45981	NA
Spot 14	174.328	5593.17	1.98937	16.9824	29.4379	0.0401175	31.7339	0.00519031	11.4809	0.361786	33.3723	3.82154	39.9387	12.4287	454.683	NA	33.3723	3.82154	NA
Spot 7	284.95	12967.9	1.62205	23.8744	21.3815	0.0291356	22.1464	0.00520345	5.57059	0.251535	33.4566	1.8589	29.161	6.36633	NA	NA	33.4566	1.8589	NA
Spot 19	323.544	8385.01	1.85238	20.6741	15.6435	0.0337533	16.2038	0.0052659	4.02924	0.24866	33.8571	1.36061	33.7068	5.37218	22.9908	NA	33.8571	1.36061	NA
Spot 3	105.973	2615.42	1.71856	26.4406	78.9992	0.023283	80.2199	0.00528533	11.2574	0.140332	33.9817	3.81539	23.3701	18.5354	NA	NA	33.9817	3.81539	NA
Spot 22	277.23	4677.85	2.24791	23.1362	25.4926	0.0291981	25.7815	0.00530295	2.67908	0.103915	34.0947	0.911013	29.2227	7.4268	NA	NA	34.0947	0.911013	NA
Spot 8	315.726	8407	2.2695	31.733	35.075	0.0218158	35.2617	0.00534116	2.70883	0.0768207	34.3397	0.927731	21.9133	7.64436	NA	NA	34.3397	0.927731	NA
Spot 16	436.413	24044.9	1.59304	22.4681	8.22186	0.032307	8.51241	0.0053531	2.08654	0.245117	34.4163	0.716195	32.2852	2.70503	NA	NA	34.4163	0.716195	NA
Spot 6	167.475	5161.22	0.997969	9.75792	423.865	0.0735585	423.951	0.00536196	8.4528	0.0199382	34.4731	2.90616	72.0707	303.696	1614.67	NA	34.4731	2.90616	NA
Spot 9	199.374	610.373	2.04383	12.3052	14.3814	0.042256	15.5893	0.00536337	3.07256	0.197093	34.4821	1.05665	42.0242	6.41767	496.988	338.529	34.4821	1.05665	NA
Spot 23	349.412	5817.07	2.63047	21.0583	22.7798	0.0331839	23.1862	0.00536906	3.81156	0.164389	34.5186	1.31218	33.1474	7.56167	NA	NA	34.5186	1.31218	NA
Spot 4	466.23	1938.75	2.04189	16.3936	8.45888	0.0394224	11.3169	0.00536939	2.29794	0.203054	34.5207	0.791146	39.26	4.35824	339.474	251.616	34.5207	0.791146	NA
Spot 1	514.607	6596.7	1.93252	21.2186	13.834	0.0331159	14.3702	0.00537022	3.38194	0.235344	34.526	1.16453	33.0806	4.67717	NA	NA	34.526	1.16453	NA
Spot 11	798.222	4652.82	1.22489	19.3487	4.39583	0.0358865	5.32719	0.00538794	1.81773	0.341217	34.6397	0.627966	35.7999	1.8739	114.324	NA	34.6397	0.627966	NA
Spot 1C	421.005	12358.4	1.45443	23.6105	17.1286	0.0305886	19.7178	0.00541034	9.66882	0.490359	34.7833	3.35408	30.5936	5.9425	NA	NA	34.7833	3.35408	NA
Spot 13	340.513	8804.7	1.65429	20.3352	13.09	0.0355457	13.6093	0.00544841	3.30735	0.243021	35.0274	1.15534	35.4659	4.74337	65.2743	NA	35.0274	1.15534	NA
Spot 17	238.02	18180.2	2.53906	22.1062	19.5243	0.0748972	19.9069	0.0122618	3.79657	0.190716	78.5643	2.96464	73.3361	14.0851	NA	NA	78.5643	2.96464	NA
Spot 20	114.143	127467	0.898009	8.45583	0.223983	5.74184	0.71736	0.353338	0.680665	0.948848	1950.52	11.4561	1937.69	6.20362	1923.99	4.05786	1923.99	4.05786	101.379
Spot 21	127.073	430532	1.10503	8.44745	0.294094	5.68924	0.55881	0.349535	0.474945	0.849923	1932.38	7.92992	1929.74	4.82586	1926.88	5.27403	1926.88	5.27403	100.285
MR19DV-4
Spot 32	276.838	514.072	0.402702	5.46999	12.5909	0.0734788	17.3983	0.00335388	0.583992	0.0335659	21.5843	0.12584	71.9953	12.0928	2443.94	296.823	21.5843	0.12584	NA
Spot 1	225.39	464.965	0.800533	4.28179	15.9446	0.0985289	17.3137	0.00342989	0.605399	0.0349664	22.0726	0.133399	95.4175	15.7691	2892.7	283.144	22.0726	0.133399	NA
Spot 30	101.212	266.66	0.892642	5.3269	21.3703	0.0663316	26.4564	0.00345057	0.540402	0.0204262	22.2055	0.119793	65.2123	16.712	2220.02	467.356	22.2055	0.119793	NA
Spot 60	144.14	277.801	0.969123	5.00059	20.6252	0.0733918	35.1745	0.00345823	0.84348	0.0239798	22.2548	0.187391	71.913	24.4248	2389.91	620.229	22.2548	0.187391	NA
Spot 46	387.231	716.917	0.749617	6.96127	10.6536	0.0615547	11.3858	0.00356149	0.667613	0.0586356	22.9181	0.152732	60.6534	6.70376	2033.75	201.813	22.9181	0.152732	NA
Spot 99	426.886	719.025	1.31719	7.58344	9.43598	0.0554758	13.8292	0.00356295	0.634593	0.0458879	22.9274	0.145237	54.8222	7.38056	1847.01	251.141	22.9274	0.145237	NA
Spot 53	239.837	462.276	0.741499	5.30937	12.0965	0.080615	14.465	0.00362734	0.630878	0.0436141	23.341	0.146987	78.723	10.9575	2468.12	245.444	23.341	0.146987	NA
Spot 3	536.763	938.007	0.639389	7.80238	8.68712	0.0572518	13.7824	0.00364841	0.626293	0.0454417	23.4764	0.146764	56.5293	7.57831	1861.12	249.864	23.4764	0.146764	NA
Spot 102	1565.02	2944.47	0.686083	12.4316	6.03874	0.0381576	6.19768	0.00366379	0.664584	0.107231	23.5752	0.156391	38.0237	2.31301	1082.8	123.694	23.5752	0.156391	NA
Spot 91	521.295	1131.97	0.630639	9.52493	8.8857	0.0472028	9.64525	0.00368878	0.488385	0.0506348	23.7357	0.115708	46.8322	4.41452	1483.95	182.945	23.7357	0.115708	NA
Spot 28	747.359	1182.33	0.767211	8.83054	7.70605	0.0523361	8.46392	0.00372093	0.610131	0.0720862	23.9422	0.145808	51.7973	4.27416	1661.02	156.568	23.9422	0.145808	NA
Spot 13	250.819	497.042	1.11331	5.13697	13.9606	0.087338	19.7769	0.00372493	0.644745	0.0326009	23.9678	0.154244	85.0205	16.1311	2558.15	334.457	23.9678	0.154244	NA
Spot 119	151.014	254.285	0.930486	3.59748	16.2408	0.119892	17.6077	0.00372907	0.615908	0.0349794	23.9944	0.147509	114.975	19.1426	3073.99	283.638	23.9944	0.147509	NA
Spot 64	133.347	246.122	1.74225	4.74995	24.2548	0.082138	28.2988	0.00375102	0.60289	0.0213044	24.1354	0.145238	80.153	21.8135	2443.08	489.936	24.1354	0.145238	NA
Spot 4	235.82	423.47	0.703172	5.91245	15.0849	0.0716655	26.8639	0.00375696	0.549856	0.0204682	24.1735	0.132671	70.2787	18.243	2206.61	475.537	24.1735	0.132671	NA
Spot 79	2371.59	4673.81	0.821602	15.6731	3.61116	0.0315127	6.07616	0.0037584	0.546896	0.0900068	24.1828	0.132007	31.5037	1.88483	632.575	130.401	24.1828	0.132007	NA
Spot 45	1509.04	2924.73	1.50736	13.3643	4.44159	0.0363258	5.68457	0.00375963	0.857999	0.150935	24.1907	0.207167	36.2304	2.02324	930.556	115.431	24.1907	0.207167	NA
Spot 66	997.841	1649.19	0.55441	12.158	5.48106	0.038152	11.0607	0.00376406	0.593024	0.0536152	24.2191	0.143356	38.0181	4.12736	1028.09	223.997	24.2191	0.143356	NA
Spot 48	3979.95	6798.77	0.548075	16.4453	2.82866	0.0305174	3.16432	0.00376434	0.560435	0.177111	24.2209	0.135488	30.5234	0.951488	559.606	67.9026	24.2209	0.135488	NA
Spot 114	873.438	1699.94	0.96002	10.2592	8.17653	0.0463316	10.125	0.00376984	0.521405	0.0514968	24.2563	0.126236	45.987	4.55235	1407.06	194.084	24.2563	0.126236	NA
Spot 12	2080.63	2286.87	1.10687	13.6841	3.53892	0.0348484	7.00255	0.00377636	0.779231	0.111278	24.2981	0.188982	34.7819	2.39438	835.559	145.137	24.2981	0.188982	NA
Spot 100	810.126	1510.19	1.47622	10.8521	6.22165	0.0430905	6.8704	0.00377761	0.604183	0.08794	24.3062	0.146577	42.8369	2.88186	1262.87	133.854	24.3062	0.146577	NA
Spot 71	3169.43	4887.64	0.875403	16.588	2.31858	0.0299007	5.21891	0.00378363	0.515962	0.0988639	24.3448	0.125373	29.9156	1.53849	503.668	114.36	24.3448	0.125373	NA
Spot 23	1545.36	2885.89	0.851353	13.4034	4.98704	0.0365354	5.66788	0.00379304	0.560669	0.0989204	24.4052	0.136574	36.4358	2.02853	924.247	115.971	24.4052	0.136574	NA
Spot 85	734.691	1393.99	0.645646	9.53259	8.26116	0.0497551	12.3936	0.0037936	0.67282	0.0542879	24.4089	0.163917	49.3038	5.96459	1530.49	233.935	24.4089	0.163917	NA
Spot 29	1761.53	3481.2	0.824735	14.2977	3.6078	0.0346343	4.61587	0.00379871	0.616877	0.133643	24.4417	0.150489	34.5718	1.56893	810.33	95.7313	24.4417	0.150489	NA
Spot 117	637.794	760.288	1.02835	8.31697	7.78001	0.0534546	14.3548	0.00379983	0.572557	0.0398862	24.4489	0.139719	52.8759	7.3961	1661.32	266.934	24.4489	0.139719	NA
Spot 43	324.011	615.254	1.21753	5.60405	13.0931	0.0829579	13.5792	0.00379986	0.603879	0.0444709	24.449	0.147363	80.9221	10.5625	2437.99	230.945	24.449	0.147363	NA
Spot 9	1348.12	2662.09	0.663166	13.5968	5.33798	0.0357937	9.47848	0.00380384	0.627763	0.0662303	24.4746	0.153351	35.709	3.32586	876.063	196.18	24.4746	0.153351	NA
Spot 44	1974.41	3918.36	0.833972	13.8128	3.61244	0.0361526	4.51822	0.00380418	0.591124	0.130831	24.4768	0.144414	36.0608	1.60072	896.518	92.4973	24.4768	0.144414	NA
Spot 27	1044.34	1809.1	0.814632	11.5392	5.84469	0.0416541	6.97739	0.00381379	0.508539	0.0728838	24.5385	0.124551	41.4377	2.83308	1177.5	137.796	24.5385	0.124551	NA
Spot 62	1292.94	2601.3	1.00267	12.0132	4.63249	0.0408818	5.05577	0.00381617	0.699753	0.138407	24.5538	0.171489	40.6847	2.01626	1139.12	99.6597	24.5538	0.171489	NA
Spot 73	472.894	744.228	0.637084	7.51802	8.80548	0.0605419	10.9461	0.00381844	0.705315	0.0644352	24.5684	0.172955	59.6842	6.34488	1879.75	197.428	24.5684	0.172955	NA
Spot 118	2058.63	3961.42	1.09668	14.9131	3.95583	0.0333431	6.9843	0.0038188	0.569833	0.0815876	24.5707	0.139745	33.3038	2.28831	719.157	147.927	24.5707	0.139745	NA
Spot 59	1845.29	3615.12	0.744973	14.4378	3.61604	0.0343756	5.10206	0.0038211	0.712339	0.139618	24.5854	0.174798	34.3179	1.72166	782.294	106.202	24.5854	0.174798	NA
Spot 26	1340.03	2534.63	1.36133	13.2545	4.95184	0.0369838	7.45885	0.00382469	0.52453	0.0703231	24.6085	0.128833	36.8749	2.70111	932.23	152.888	24.6085	0.128833	NA
Spot 105	687.584	1402.51	1.77956	8.92521	9.67175	0.0538259	11.7995	0.00382594	0.627989	0.0532214	24.6165	0.154294	53.2338	6.1196	1661.47	218.901	24.6165	0.154294	NA
Spot 116	1426.38	2736.44	0.633035	14.2067	3.4997	0.0343157	8.10224	0.00382696	0.625477	0.077198	24.6231	0.153718	34.2591	2.72945	775.403	170.185	24.6231	0.153718	NA
Spot 21	1883.73	3079.7	1.06537	13.7875	3.93843	0.0359221	4.32392	0.00382893	0.538365	0.124509	24.6357	0.132377	35.8349	1.52245	869.844	88.9595	24.6357	0.132377	NA
Spot 101	1599.35	3146.79	1.25676	13.4914	5.26151	0.0368002	7.74337	0.00384049	0.624007	0.0805859	24.7099	0.153897	36.6951	2.79072	913.491	159.088	24.7099	0.153897	NA
Spot 115	1050.86	1889.94	0.74788	12.7771	4.98612	0.0373955	7.59584	0.00384197	0.647693	0.0852694	24.7195	0.1598	37.278	2.78024	945.661	155.195	24.7195	0.1598	NA
Spot 57	620.382	1033.84	0.712397	8.65973	8.29777	0.0542013	10.3598	0.00384461	0.781	0.0753873	24.7364	0.192821	53.5954	5.40845	1665.32	191.663	24.7364	0.192821	NA
Spot 93	1400.17	2543.69	0.984505	12.3844	4.1651	0.0400017	4.53478	0.00385317	0.618117	0.136306	24.7914	0.152946	39.8257	1.77105	1076.37	90.2245	24.7914	0.152946	NA
Spot 80	2870.48	1237.95	0.747765	14.3332	3.83653	0.0309111	15.1599	0.00385846	0.713079	0.047037	24.8254	0.176684	30.9113	4.61555	533.643	333.292	24.8254	0.176684	NA
Spot 47	1585.01	3318.55	1.45137	14.2213	3.85918	0.0351791	4.86139	0.00385892	0.599503	0.123319	24.8283	0.14856	35.1063	1.67749	810.083	100.973	24.8283	0.14856	NA
Spot 37	1574.86	3371.13	0.980375	13.8248	4.90594	0.0364091	5.6072	0.00386173	0.516447	0.0921041	24.8464	0.128071	36.3121	2.00012	880.061	115.596	24.8464	0.128071	NA
Spot 108	1621.19	3284.63	1.00595	14.8902	4.45704	0.0333634	7.99303	0.0038623	0.643429	0.0804987	24.8501	0.159585	33.3238	2.62035	696.376	169.988	24.8501	0.159585	NA
Spot 34	1648.82	3283.79	0.79069	13.4955	4.63822	0.037306	6.31884	0.0038626	0.682809	0.108059	24.852	0.169365	37.1904	2.30749	929.756	129.098	24.852	0.169365	NA
Spot 78	532.802	884.99	0.48398	9.59044	7.04266	0.0471847	13.6555	0.00386365	0.695426	0.0509264	24.8587	0.172541	46.8146	6.24772	1394.93	262.747	24.8587	0.172541	NA
Spot 97	1987.05	4512.89	1.29839	15.2565	3.81327	0.0332563	5.13158	0.00386427	0.586645	0.114321	24.8627	0.145575	33.2186	1.67705	688.46	108.811	24.8627	0.145575	NA
Spot 31	1398.56	2380.64	1.01957	12.2012	4.95151	0.0406876	5.74574	0.0038646	0.540069	0.0939948	24.8648	0.134028	40.4951	2.28096	1104.47	114.455	24.8648	0.134028	NA
Spot 33	1116.78	2067.58	0.615062	11.6701	5.53575	0.0422108	6.48681	0.00386476	0.644898	0.0994169	24.8659	0.160051	41.9802	2.66766	1177.49	127.771	24.8659	0.160051	NA
Spot 17	3237.39	5890.28	0.925953	17.6005	2.1121	0.0290784	3.17141	0.00387004	0.510394	0.160936	24.8998	0.126842	29.1046	0.909923	391.526	70.2509	24.8998	0.126842	NA
Spot 86	1090.79	2045.83	0.851775	10.7079	6.96748	0.0462805	7.49191	0.00387198	0.659962	0.0880899	24.9122	0.164093	45.9375	3.36492	1353.57	144.126	24.9122	0.164093	NA
Spot 24	2203.55	3768	0.830767	15.6307	3.19945	0.0322824	3.87295	0.00387513	0.524702	0.135479	24.9324	0.130568	32.2611	1.22981	618.618	82.8482	24.9324	0.130568	NA
Spot 77	3575.29	7029.28	1.05622	18.0834	2.40935	0.0284669	2.74257	0.00387583	0.610141	0.222471	24.9369	0.151857	28.501	0.770791	340.285	60.5326	24.9369	0.151857	NA
Spot 40	1205.82	2311.33	0.687018	12.5317	5.38976	0.0396725	6.17806	0.0038948	0.499966	0.0809261	25.0587	0.125042	39.5042	2.39373	1038.06	124.427	25.0587	0.125042	NA
Spot 110	1671.24	3157.79	0.853436	13.6222	4.46899	0.0369482	5.07316	0.00389635	1.03906	0.204815	25.0687	0.259973	36.8401	1.83546	892.035	102.61	25.0687	0.259973	NA
Spot 75	1491.84	3023.22	0.838588	13.5623	4.11045	0.0371297	8.026	0.0038998	0.588635	0.073341	25.0909	0.147407	37.0178	2.91755	900.277	165.344	25.0909	0.147407	NA
Spot 95	4352.63	8467.63	1.04394	18.2481	1.69925	0.0285949	1.98892	0.00390276	0.592286	0.297792	25.1098	0.148433	28.6274	0.561425	334.733	43.0345	25.1098	0.148433	NA
Spot 81	2380.7	4533.3	0.960484	15.4799	2.54915	0.0331088	3.68756	0.00390354	0.608939	0.165133	25.1149	0.152637	33.0736	1.19996	657.282	78.0177	25.1149	0.152637	NA
Spot 72	581.098	1034.35	0.671112	7.998	8.70264	0.0603663	9.78543	0.003911	0.558328	0.0570571	25.1627	0.140217	59.5161	5.65657	1831.22	177.499	25.1627	0.140217	NA
Spot 50	2944.13	5829.91	0.684875	16.5977	2.5965	0.0311972	3.4108	0.00391315	0.659405	0.193328	25.1766	0.165692	31.193	1.04776	522.973	73.4423	25.1766	0.165692	NA
Spot 6	423.921	909.999	0.966554	6.6746	11.2229	0.0731569	12.0239	0.00391626	0.614973	0.0511459	25.1965	0.15465	71.6908	8.32295	2170.21	210.056	25.1965	0.15465	NA
Spot 25	794.541	1430.84	0.711084	11.189	6.13537	0.0431453	11.9021	0.00391812	0.643701	0.0540828	25.2085	0.16195	42.8903	4.99859	1193.66	235.301	25.2085	0.16195	NA
Spot 39	285.266	559.35	0.832116	5.05664	9.90342	0.0952279	13.1462	0.00391857	0.628175	0.0477838	25.2114	0.158062	92.3617	11.6067	2617.91	219.551	25.2114	0.158062	NA
Spot 18	742.705	1671.79	0.62887	9.66374	8.21807	0.0516556	9.48286	0.00392175	0.658987	0.0694925	25.2318	0.165949	51.1405	4.72951	1538.51	178.348	25.2318	0.165949	NA
Spot 120	3214.82	5915.39	0.461951	16.9425	2.38429	0.0305411	2.82312	0.00392325	0.527294	0.186777	25.2414	0.132836	30.5468	0.849531	470.51	61.416	25.2414	0.132836	NA
Spot 16	1603.25	2838.42	0.680773	13.6392	4.01907	0.0370844	5.25861	0.00392893	0.625996	0.119042	25.2779	0.157929	36.9734	1.90932	882.43	108.05	25.2779	0.157929	NA
Spot 51	1631.47	3388.84	1.63396	13.9841	4.03553	0.0365427	5.42678	0.00393549	0.680698	0.125433	25.32	0.172015	36.4429	1.94261	848.454	112.037	25.32	0.172015	NA
Spot 58	2441.64	4432.83	0.512313	16.3109	2.86863	0.0315597	5.63635	0.0039463	0.666341	0.118222	25.3894	0.168847	31.5499	1.75092	529.853	122.709	25.3894	0.168847	NA
Spot 82	2283.07	4077.17	0.88749	15.9439	2.668	0.0322742	6.15525	0.0039498	0.660283	0.107272	25.4119	0.16746	32.253	1.95405	576.767	133.145	25.4119	0.16746	NA
Spot 41	1694.11	3428.55	0.645507	15.0936	3.33694	0.033929	6.30372	0.00395359	0.780393	0.123799	25.4362	0.198111	33.8794	2.10043	682.389	133.73	25.4362	0.198111	NA
Spot 98	1641.86	3065.15	0.910364	13.7162	3.94255	0.0372217	6.27069	0.00395631	0.583026	0.0929764	25.4537	0.148109	37.1079	2.28492	875.667	129.377	25.4537	0.148109	NA
Spot 112	1420.82	3079.17	0.82165	12.7337	4.18817	0.0403596	6.4699	0.00396765	0.579901	0.0896305	25.5265	0.147736	40.175	2.54854	1035.31	130.294	25.5265	0.147736	NA
Spot 74	1368.68	2652.09	1.06643	14.7952	4.98215	0.0341061	8.09502	0.00397767	0.675937	0.0835004	25.5909	0.172635	34.0533	2.71091	680.535	172.57	25.5909	0.172635	NA
Spot 55	1759.56	3341.46	0.918397	14.4329	4.05916	0.0356865	5.76939	0.0039802	0.57251	0.0992324	25.6071	0.146312	35.6039	2.01853	775.208	120.844	25.6071	0.146312	NA
Spot 65	1632.9	2585.09	1.61351	13.1837	3.98238	0.0385672	5.62054	0.00398292	0.655791	0.116678	25.6245	0.16771	38.4242	2.1193	935.069	114.585	25.6245	0.16771	NA
Spot 92	1980.92	4085.53	0.985265	14.4426	3.66297	0.0362336	5.33398	0.00399405	0.749563	0.140526	25.696	0.192225	36.1401	1.89381	799.857	110.726	25.696	0.192225	NA
Spot 103	262.612	603.698	2.20406	4.84182	15.7069	0.102602	16.5234	0.00399605	0.662195	0.0400763	25.7088	0.169904	99.1751	15.6134	2709.04	274.461	25.7088	0.169904	NA
Spot 94	1111.9	640.559	1.24802	10.7314	5.43183	0.0391002	15.8508	0.00399995	0.572777	0.0361355	25.7339	0.147104	38.9452	6.05632	954.407	325.87	25.7339	0.147104	NA
Spot 38	1839.22	2797.42	0.635011	14.356	3.825	0.0357333	4.32153	0.0040036	0.442222	0.10233	25.7573	0.113677	35.6497	1.51388	765.628	90.6015	25.7573	0.113677	NA
Spot 76	1531.15	2837.33	1.05426	14.4658	3.70079	0.0355168	5.3664	0.00401872	0.55586	0.103582	25.8544	0.143427	35.4375	1.86892	744.848	112.888	25.8544	0.143427	NA
Spot 61	2110.19	3800.66	0.644939	15.728	3.55489	0.0331289	5.07047	0.00402231	0.674887	0.133102	25.8775	0.174294	33.0933	1.65094	593.981	108.97	25.8775	0.174294	NA
Spot 42	1186.28	1784.46	0.445855	13.1299	5.31254	0.0380325	10.6117	0.00403634	0.611235	0.0576004	25.9676	0.158404	37.9013	3.94784	878.818	219.801	25.9676	0.158404	NA
Spot 90	543.23	1088.11	0.847362	7.82954	9.42578	0.0643587	13.4634	0.00404253	0.52742	0.0391743	26.0073	0.136891	63.332	8.26635	1887.15	243.331	26.0073	0.136891	NA
Spot 56	637.448	826.323	0.802704	9.10829	7.30146	0.0518894	12.4854	0.0040452	0.610527	0.0488992	26.0244	0.158566	51.3662	6.25385	1488.54	237.049	26.0244	0.158566	NA
Spot 70	344.668	658.102	0.670801	7.36018	10.8873	0.0645484	15.1603	0.00405748	0.590064	0.0389218	26.1033	0.153714	63.5129	9.33401	1885.8	274.399	26.1033	0.153714	NA
Spot 22	1675.47	3043.57	1.77004	13.687	4.0121	0.0388728	4.49756	0.00411432	0.625146	0.138997	26.4682	0.165125	38.723	1.7088	884.463	92.1385	26.4682	0.165125	NA
Spot 11	429.13	971.863	1.00939	7.65253	9.9005	0.0670792	12.8742	0.00416323	0.545596	0.0423792	26.7822	0.14582	65.9239	8.21769	1908.69	231.958	26.7822	0.14582	NA
Spot 106	268.049	566.947	1.01386	6.04266	12.7848	0.0821976	15.1044	0.00418979	0.749905	0.049648	26.9527	0.201698	80.209	11.6495	2255.22	262.067	26.9527	0.201698	NA
Spot 49	250.679	566.781	1.04641	6.00682	15.2013	0.0837527	16.5674	0.00422582	0.573554	0.0346195	27.184	0.155587	81.667	13.001	2272.77	287.462	27.184	0.155587	NA
Spot 104	1169.4	4135.11	1.10884	12.8068	2.6036	0.0643406	3.59393	0.00626482	0.717038	0.199514	40.2596	0.287777	63.3147	2.20599	1054.69	70.9623	40.2596	0.287777	NA
Spot 7	812.562	6228.44	2.36022	16.5819	2.4179	0.119744	2.89217	0.014972	0.597409	0.206561	95.8006	0.56809	114.84	3.14044	530.004	61.9918	95.8006	0.56809	NA
Spot 113	1448.5	9565.97	2.11461	18.3341	1.68758	0.114863	2.64253	0.0157401	0.577984	0.218723	100.677	0.577377	110.404	2.76445	325.623	58.5475	100.677	0.577377	NA
Spot 35	842.485	7285.82	1.87971	17.3525	1.97688	0.134982	3.16613	0.0175192	0.599978	0.189499	111.958	0.665927	128.565	3.82339	447.603	69.0939	111.958	0.665927	NA
Spot 67	1056.54	1547.12	1.05549	16.1716	1.56913	0.169505	14.37	0.023503	0.538705	0.0374881	149.757	0.797448	158.989	21.151	298.827	NA	149.757	0.797448	NA
Spot 2	232.543	3124.74	0.931911	13.2274	4.32017	0.245605	6.75991	0.0250696	0.601419	0.0889685	159.617	0.948177	223	13.5349	958.952	137.749	159.617	0.948177	NA
Spot 15	1672.62	19641.3	0.92555	19.4583	1.01408	0.176565	1.63136	0.0252093	0.679103	0.41628	160.495	1.07647	165.1	2.48582	231.629	34.2449	160.495	1.07647	NA
Spot 68	840.688	10560.4	1.52809	18.3793	1.93901	0.18658	2.15567	0.0255312	0.594553	0.275808	162.519	0.954181	173.707	3.44178	328.88	46.9961	162.519	0.954181	NA
Spot 52	1102.28	15794.1	1.45038	19.0104	1.28147	0.184075	1.97631	0.0258032	0.595368	0.301252	164.228	0.965411	171.561	3.11962	273.885	43.1842	164.228	0.965411	NA
Spot 8	1116.7	12453.5	1.39515	18.666	1.279	0.186793	1.96777	0.025816	0.480422	0.244146	164.309	0.779401	173.889	3.14478	306.227	43.4655	164.309	0.779401	NA
Spot 88	952.397	13374.3	0.76923	18.6784	1.62869	0.192735	1.9193	0.0266345	0.78768	0.4104	169.45	1.31733	178.96	3.14913	306.476	39.8688	169.45	1.31733	NA
Spot 87	1035.3	12625.3	1.14219	18.5082	1.44553	0.195787	2.07033	0.026807	0.576832	0.278619	170.533	0.970793	181.555	3.44192	327.555	45.1067	170.533	0.970793	NA
Spot 107	1683.29	20671.2	0.933345	19.2816	1.06193	0.189364	1.74638	0.0269022	0.53201	0.304636	171.131	0.898456	176.086	2.82327	243.173	38.3323	171.131	0.898456	NA
Spot 111	533.153	6279.33	1.4006	16.8057	2.11212	0.212453	2.80641	0.026989	0.683428	0.243524	171.676	1.1578	195.609	4.99324	495.103	60.0214	171.676	1.1578	NA
Spot 10	569.266	8578.78	1.45344	16.9866	2.49667	0.215329	2.88446	0.0272742	1.08007	0.374447	173.466	1.84858	198.015	5.18927	501.566	58.8997	173.466	1.84858	NA
Spot 84	765.136	6221.87	1.27236	17.8255	1.79936	0.20382	2.96276	0.027451	0.625706	0.21119	174.575	1.07767	188.353	5.09349	364.771	65.2795	174.575	1.07767	NA
Spot 54	258.299	3336.9	1.3112	14.4375	3.0906	0.248063	5.9709	0.0276651	0.688939	0.115383	175.919	1.19558	225.001	12.0508	775.354	124.853	175.919	1.19558	NA
Spot 63	3604.59	57853.8	2.44135	19.5965	0.678506	0.233494	0.959001	0.0333862	0.607168	0.633126	211.707	1.26454	213.079	1.84327	228.255	17.1492	211.707	1.26454	NA
Spot 69	3962.53	22413.4	3.18207	19.3918	0.657389	0.240813	1.53948	0.0342943	0.539241	0.350274	217.369	1.1526	219.086	3.03374	237.565	33.2372	217.369	1.1526	NA
Spot 20	2275.62	42499.3	1.79296	19.6906	0.736954	0.240181	0.994848	0.0344401	0.531278	0.534029	218.277	1.14025	218.568	1.95632	221.725	19.4544	218.277	1.14025	NA
Spot 83	3641.88	57701.5	2.63854	19.6615	0.596187	0.242148	0.875925	0.0346768	0.541058	0.617699	219.752	1.16895	220.178	1.73382	224.708	15.9298	219.752	1.16895	NA
Spot 96	4732.08	75189.3	1.36923	19.6275	0.522474	0.244017	0.767993	0.034823	0.459196	0.597916	220.663	0.996131	221.705	1.52961	232.749	14.2332	220.663	0.996131	NA
Spot 19	2405.83	39698.7	2.06637	19.6561	0.808123	0.244015	1.08625	0.034945	0.567447	0.522391	221.423	1.23513	221.702	2.16347	224.676	21.4146	221.423	1.23513	NA
Spot 109	1274.07	20351.9	1.98976	19.1891	1.07047	0.256037	1.68604	0.0361758	0.489021	0.290041	229.085	1.1006	231.468	3.48979	255.749	37.1103	229.085	1.1006	NA
Spot 14	1086.2	3616.65	1.67779	17.9446	1.20497	0.261007	1.93779	0.0365233	0.770212	0.39747	231.246	1.74952	235.478	4.07262	277.94	40.7173	231.246	1.74952	NA
Spot 89	2877.39	52775.2	1.55455	19.7043	0.678723	0.261641	0.884511	0.0375463	0.506115	0.572197	237.606	1.18067	235.989	1.86253	219.905	16.7842	237.606	1.18067	NA
Spot 36	227.681	36206.5	0.570241	8.68407	0.719232	5.29122	0.971999	0.332799	0.637903	0.656279	1851.93	10.2681	1867.45	8.30092	1884.74	13.2058	1884.74	13.2058	98.2594
MR19DV-5
Spot 24	62.28	778.55	0.766171	11.9395	88.3532	0.0279143	90.6387	0.00312002	17.9858	0.198434	20.0816	3.60622	27.9553	24.9978	770.707	NA	20.0816	3.60622	NA
Spot 22	61.5693	1598.08	0.821921	-0.560411	-2280.54	-0.840055	2280.62	0.0033695	18.6881	0.00819429	21.6847	4.04564	NA	NA	NA	NA	21.6847	4.04564	NA
Spot 11	113.72	1371.41	0.658376	27.1494	69.2421	0.0119395	74.0325	0.00337296	13.7829	0.186174	21.7069	2.98681	12.0513	8.86938	NA	NA	21.7069	2.98681	NA
Spot 9	49.9644	690.622	0.529122	6.66552	107.191	0.061451	109.257	0.00341553	19.7795	0.181036	21.9804	4.34021	60.5542	64.3116	2104.52	NA	21.9804	4.34021	NA
Spot 1	58.8966	707.206	0.839844	6.81119	331.662	0.060268	332.635	0.00342361	24.9035	0.0748672	22.0323	5.47744	59.4219	194.324	2066.17	NA	22.0323	5.47744	NA
Spot 17	60.8943	1159.54	0.732167	-1.1343	-2904.39	-0.427797	2904.5	0.00342517	24.9328	0.00858419	22.0423	5.48639	NA	NA	NA	NA	22.0423	5.48639	NA
Spot 8	51.1235	529.039	0.887127	6.01269	161.428	0.0670386	162.574	0.00344138	18.295	0.112534	22.1465	4.04476	65.8853	104.074	2242.98	NA	22.1465	4.04476	NA
Spot 23	114.299	2562.04	0.462421	9.12186	220.987	0.0495345	221.222	0.00345921	9.87956	0.0446591	22.261	2.1955	49.0904	106.403	1694.12	NA	22.261	2.1955	NA
Spot 3	121.515	1956.46	0.733545	2.25327	1221.2	0.209926	1221.24	0.00347068	9.31317	0.00762602	22.3347	2.07647	193.49	NA	4047.27	NA	22.3347	2.07647	NA
Spot 15	146.863	2033.81	0.585582	15.7096	31.049	0.0270566	35.2306	0.00348789	16.0202	0.454725	22.4453	3.58953	27.1077	9.42411	462.712	NA	22.4453	3.58953	NA
Spot 13	71.8369	1647.59	0.930075	16.003	143.228	0.025821	143.965	0.0035103	12.7921	0.0888551	22.5892	2.88457	25.8855	36.8112	343.675	NA	22.5892	2.88457	NA
Spot 10	98.2701	2860.69	0.733999	20.029	143.994	0.021588	144.751	0.00351147	12.6044	0.0870766	22.5968	2.8432	21.6869	31.0688	NA	NA	22.5968	2.8432	NA
Spot 20	120.968	2532.3	0.556305	25.1618	78.4446	0.0166064	79.6857	0.003577	10.3241	0.12956	23.0177	2.37212	16.7234	13.2178	NA	NA	23.0177	2.37212	NA
Spot 21	48.825	856.187	0.811541	3.67882	417.32	0.127514	418.062	0.00358239	24.8014	0.0593247	23.0523	5.70708	121.861	521.57	3235.48	NA	23.0523	5.70708	NA
Spot 19	95.5178	1058.69	0.610516	-10.7692	-409.425	-0.0543037	409.639	0.00360949	12.0782	0.0294851	23.2264	2.80029	NA	-243.398	NA	NA	23.2264	2.80029	NA
Spot 7	102.057	291.315	0.669468	9.01889	32.8044	0.0305889	43.9691	0.00364631	19.5152	0.44384	23.4629	4.57051	30.5939	13.2519	633.701	NA	23.4629	4.57051	NA
Spot 18	131.635	2117.28	0.889865	12.7955	104.869	0.0362473	105.442	0.00369874	9.84533	0.0933718	23.7997	2.33883	36.1535	37.4674	959.567	NA	23.7997	2.33883	NA
Spot 5	66.5824	920.598	0.615241	8.36255	43.4245	0.0540631	46.971	0.0037554	16.7147	0.355852	24.1635	4.03131	53.4622	24.4669	1703.93	853.179	24.1635	4.03131	NA
Spot 14	88.0876	1091.01	0.764332	13.0698	59.0131	0.0326883	62.11	0.00376576	16.8168	0.270758	24.23	4.06707	32.6602	19.9651	706.775	NA	24.23	4.06707	NA
Spot 16	219.768	3155.99	1.43312	19.7857	39.8661	0.0237436	40.6451	0.00377267	6.61231	0.162684	24.2744	1.60208	23.8271	9.57207	NA	NA	24.2744	1.60208	NA
Spot 12	295.248	5405.15	0.880987	22.1629	21.1829	0.0221098	21.7751	0.00379944	4.35352	0.199931	24.4464	1.06226	22.2053	4.78278	NA	NA	24.4464	1.06226	NA
Spot 2	78.7371	1084.3	0.596792	5.91127	377.198	0.0847766	377.32	0.00391708	9.09564	0.0241059	25.2018	2.28779	82.6259	308.578	2423.25	NA	25.2018	2.28779	NA
Spot 6	134.723	2901.12	0.980232	23.8022	60.8878	0.0203828	63.1242	0.00402396	15.429	0.244423	25.8881	3.98625	20.4882	12.8041	NA	NA	25.8881	3.98625	NA
MR19DV-6
Spot 44	618.054	108.336	0.543863	4.12475	11.7478	0.0272669	53.367	0.00167162	0.582623	0.0109173	10.767	0.0626786	27.3156	14.3841	1930.73	1041.53	10.767	0.0626786	NA
Spot 13	966.403	744.552	0.653681	8.56891	9.10982	0.0251883	20.3276	0.00186299	0.834697	0.0410622	11.9984	0.100057	25.259	5.07126	1587.53	383.625	11.9984	0.100057	NA
Spot 28	146.742	203.264	0.767297	4.43259	24.9469	0.0442645	32.2495	0.00195994	0.601543	0.0186528	12.6222	0.0758538	43.9791	13.8811	2495.25	559.47	12.6222	0.0758538	NA
Spot 96	332.253	383.39	0.986839	4.57716	14.9775	0.0508581	18.4492	0.00198004	0.643817	0.0348967	12.7515	0.0820154	50.3702	9.06641	2709.65	307.087	12.7515	0.0820154	NA
Spot 31	162.205	192.547	1.84626	4.5874	25.2564	0.041847	40.6117	0.00200255	0.553893	0.0136387	12.8964	0.0713606	41.6257	16.5646	2363.57	727.427	12.8964	0.0713606	NA
Spot 34	141.85	190.125	1.15861	4.0921	22.6962	0.0510164	28.1083	0.00205645	0.627867	0.0223375	13.2431	0.0830637	50.5232	13.8545	2652.16	476.756	13.2431	0.0830637	NA
Spot 93	366.392	481.72	1.60319	4.93463	10.6213	0.0501038	14.6465	0.00205713	0.679241	0.0463756	13.2475	0.0898899	49.641	7.09593	2621.63	244.826	13.2475	0.0898899	NA
Spot 107	401.266	559.354	1.80985	5.03691	14.0654	0.0505013	15.013	0.00207748	0.624415	0.0415917	13.3784	0.08345	50.0254	7.32842	2618.4	251.154	13.3784	0.08345	NA
Spot 42	427.239	459.905	1.04928	5.05813	12.2089	0.0490197	17.0289	0.00208179	0.578553	0.0339748	13.4061	0.0774809	48.5923	8.08002	2565.27	286.948	13.4061	0.0774809	NA
Spot 52	561.152	629.707	0.991143	7.31256	11.7724	0.0332187	18.506	0.00209432	0.694987	0.0375547	13.4868	0.0936332	33.1816	6.04141	1880.45	336.192	13.4868	0.0936332	NA
Spot 35	459.232	148.333	1.29833	4.78589	12.2115	0.0343922	58.3062	0.00210616	0.532158	0.00912696	13.5629	0.0721002	34.3342	19.6867	1932.67	1160.87	13.5629	0.0721002	NA
Spot 89	452.943	582.43	0.803575	5.80343	14.6431	0.0437201	17.1176	0.00211556	0.677402	0.0395734	13.6233	0.0921874	43.4496	7.28076	2344.59	294.869	13.6233	0.0921874	NA
Spot 5	449.724	342.446	1.17579	4.97042	12.4692	0.0480617	16.5815	0.00212638	0.528638	0.0318813	13.693	0.0723095	47.6646	7.721	2496.59	281.199	13.693	0.0723095	NA
Spot 118	1048.87	1143.44	0.646195	10.2175	7.02036	0.0252372	10.1478	0.00213729	0.452	0.0445418	13.7631	0.062143	25.3074	2.5364	1330.06	196.663	13.7631	0.062143	NA
Spot 24	249.852	247.35	0.615748	4.43571	16.1528	0.0521299	25.7074	0.00215449	0.626761	0.0243806	13.8738	0.086862	51.5983	12.9339	2610.65	436.052	13.8738	0.086862	NA
Spot 14	192.013	273.298	1.5025	4.76483	27.0349	0.0494576	36.9493	0.00219174	0.630805	0.0170721	14.1134	0.0889307	49.0161	17.6827	2493.82	647.537	14.1134	0.0889307	NA
Spot 77	1056.67	1412.52	0.958838	10.1557	6.76047	0.0270018	9.01607	0.00220888	0.699594	0.0775941	14.2237	0.0993982	27.0535	2.40696	1396.76	172.676	14.2237	0.0993982	NA
Spot 80	1215.52	400.444	1.04445	9.54252	6.42612	0.0212068	50.0601	0.00223335	0.606997	0.0121254	14.381	0.0871951	21.3079	10.556	894.784	NA	14.381	0.0871951	NA
Spot 87	660.487	829.234	0.889236	9.28864	10.5808	0.0279622	15.4504	0.00223759	0.612806	0.0396627	14.4083	0.0881965	28.0026	4.26744	1438.9	296.073	14.4083	0.0881965	NA
Spot 114	439.379	558.046	0.546777	6.29219	12.5524	0.0420603	20.6007	0.00225116	0.554722	0.0269273	14.4956	0.08032	41.8336	8.4431	2170.54	362.987	14.4956	0.08032	NA
Spot 58	551	856.953	0.804189	7.6342	9.30075	0.0360677	11.5998	0.00227256	0.667212	0.0575194	14.6332	0.0975239	35.9776	4.10027	1881.55	209.344	14.6332	0.0975239	NA
Spot 6	4090.69	5607.35	0.870212	17.031	2.50064	0.0176221	3.35188	0.00228488	0.551712	0.164598	14.7125	0.0810779	17.7374	0.589372	449.82	73.455	14.7125	0.0810779	NA
Spot 97	784.139	994.262	0.451342	8.54823	7.13567	0.0324948	9.69149	0.00228985	0.592901	0.0611774	14.7445	0.0873201	32.47	3.09705	1677.45	179.135	14.7445	0.0873201	NA
Spot 9	708.175	862.408	0.640726	7.17363	9.05259	0.0391404	9.48075	0.00229789	0.499477	0.0526833	14.7962	0.0738187	38.9844	3.62598	2007.9	168.425	14.7962	0.0738187	NA
Spot 15	203.472	276.302	0.549971	4.59005	13.8453	0.0551924	20.6824	0.00231699	1.03406	0.0499973	14.919	0.154093	54.5495	10.9849	2584.59	348.986	14.919	0.154093	NA
Spot 86	286.646	290.136	1.16606	4.85387	15.4408	0.0518349	25.3837	0.00231791	0.592122	0.0233268	14.9249	0.0882715	51.3135	12.7023	2478.61	435.907	14.9249	0.0882715	NA
Spot 33	426.023	539.776	1.4372	5.45942	12.1796	0.0514915	13.3074	0.00233704	0.513806	0.0386107	15.048	0.0772273	50.982	6.61694	2453.5	225.976	15.048	0.0772273	NA
Spot 120	471.668	519.741	0.932926	6.3394	12.1848	0.042939	21.5322	0.00234873	0.508342	0.0236084	15.1232	0.0767873	42.6894	9.00168	2132.56	381.436	15.1232	0.0767873	NA
Spot 84	734.104	976.171	0.728614	8.09015	8.73752	0.0354422	12.1527	0.00234876	0.600338	0.0493998	15.1233	0.0906848	35.3643	4.22375	1790.11	221.942	15.1233	0.0906848	NA
Spot 61	676.739	915.4	0.789751	7.32102	11.157	0.0403071	13.1166	0.00239917	0.656112	0.0500213	15.4475	0.101232	40.1238	5.16031	1983.45	234.217	15.4475	0.101232	NA
Spot 113	881.484	963.63	1.09446	8.92169	7.5441	0.0324245	9.22545	0.00240616	0.628055	0.0680785	15.4924	0.0971842	32.4008	2.94193	1581.32	172.529	15.4924	0.0971842	NA
Spot 67	152.394	262.782	0.899838	5.70233	15.7822	0.0416508	38.093	0.00241966	0.530491	0.0139262	15.5793	0.082547	41.4345	15.4672	2026.57	702.725	15.5793	0.082547	NA
Spot 30	685.271	834.974	1.16116	7.75817	9.75017	0.037638	16.695	0.00241968	0.505581	0.0302833	15.5794	0.0786713	37.5153	6.14898	1845.24	304.136	15.5794	0.0786713	NA
Spot 50	485.15	169.182	0.528452	5.06411	12.7493	0.0400744	51.7456	0.00247028	0.532718	0.0102949	15.9048	0.0846234	39.8967	20.2471	1920.93	1005	15.9048	0.0846234	NA
Spot 45	389.212	511.24	0.87747	6.39696	12.207	0.0471311	19.2421	0.00262497	0.634918	0.0329963	16.8995	0.107157	46.7626	8.79427	2100.93	341.093	16.8995	0.107157	NA
Spot 12	370.101	721.431	1.91109	7.2395	10.3966	0.0612912	12.5972	0.00372192	0.539959	0.0428633	23.9485	0.129072	60.4014	7.38714	1947.77	225.879	23.9485	0.129072	NA
Spot 22	1742.32	2980.08	0.946429	15.0029	3.47698	0.0328659	7.99276	0.00386066	0.620003	0.0775706	24.8395	0.15371	32.8348	2.58244	665.212	170.915	24.8395	0.15371	NA
Spot 110	1091.02	2310.72	0.746279	12.8107	5.27589	0.0383451	8.05623	0.00386683	0.554865	0.068874	24.8791	0.137779	38.207	3.02086	983.714	163.878	24.8791	0.137779	NA
Spot 41	743.102	1529.53	0.769149	11.6125	6.26999	0.0422702	7.90192	0.00398662	0.875045	0.110738	25.6483	0.223988	42.0381	3.254	1118.63	156.886	25.6483	0.223988	NA
Spot 26	1024.5	2540.71	1.87183	13.1136	5.87647	0.0408072	6.95188	0.00418912	0.59868	0.0861177	26.9484	0.160998	40.6118	2.76757	947.289	141.96	26.9484	0.160998	NA
Spot 62	644.907	1288.4	0.292557	10.8087	6.5866	0.052637	9.5638	0.00467509	0.595859	0.0623036	30.0673	0.178742	52.0876	4.85597	1237.35	187.558	30.0673	0.178742	NA
Spot 116	172.184	1318.38	1.71677	9.61486	7.54947	0.174094	8.58777	0.0134996	0.557848	0.0649584	86.4417	0.478994	162.966	12.9305	1498.68	162.353	86.4417	0.478994	NA
Spot 55	1091.4	10011.2	2.98871	17.9766	1.96355	0.129416	2.81929	0.0173684	0.632047	0.224187	111.003	0.695584	123.573	3.28024	372.755	61.8621	111.003	0.695584	NA
Spot 83	3885.52	18537.4	3.21194	19.9964	0.847203	0.124835	1.46309	0.0184144	0.636031	0.434719	117.627	0.741361	119.446	1.64872	155.807	30.8485	117.627	0.741361	NA
Spot 7	210.219	2905.46	1.85462	13.0286	4.83816	0.238578	8.31024	0.0241631	0.535505	0.0644391	153.913	0.814451	217.256	16.255	974.895	169.359	153.913	0.814451	NA
Spot 90	345.76	4845.16	1.53706	15.9512	3.20104	0.208791	3.92327	0.0254291	0.621042	0.158297	161.877	0.992808	192.537	6.88089	587.261	84.0991	161.877	0.992808	NA
Spot 48	1362.48	16919.9	0.893467	19.5127	1.05023	0.176559	1.37573	0.0254642	0.616022	0.447778	162.098	0.986108	165.095	2.09624	208.313	28.5403	162.098	0.986108	NA
Spot 92	1093.47	14226.1	1.40609	18.7393	1.4029	0.185091	1.87015	0.0257132	0.51137	0.273437	163.662	0.826385	172.432	2.9658	294.468	41.0508	163.662	0.826385	NA
Spot 3	513.63	10406.2	2.08844	11.7954	3.7092	0.295563	3.80391	0.0257747	0.585424	0.1539	164.049	0.948268	262.929	8.81175	1273.17	73.3302	164.049	0.948268	NA
Spot 20	288.171	4183.92	1.33458	15.6923	3.32474	0.215911	6.2407	0.026006	0.588926	0.0943685	165.503	0.962282	198.501	11.2526	611.271	134.378	165.503	0.962282	NA
Spot 117	836.057	12822.4	1.43887	18.2062	1.63159	0.197442	2.00651	0.0266028	0.591992	0.295035	169.251	0.988916	182.96	3.35938	363.856	43.2122	169.251	0.988916	NA
Spot 57	648.158	7934.05	1.08405	17.7313	1.81669	0.19989	2.46409	0.0266474	0.523093	0.212287	169.532	0.875249	185.033	4.16811	387.808	54.0741	169.532	0.875249	NA
Spot 99	647.665	10423.1	1.41864	17.9042	1.59228	0.200818	2.61895	0.0267975	0.612022	0.23369	170.474	1.02966	185.818	4.44719	385.596	57.1987	170.474	1.02966	NA
Spot 82	837.494	6928.44	0.884851	18.6794	1.52547	0.190072	3.86646	0.0268214	0.614938	0.159044	170.624	1.03547	176.691	6.2704	258.654	87.746	170.624	1.03547	NA
Spot 78	1453.26	16555.6	1.19708	19.474	1.0208	0.187787	1.63272	0.0269808	0.543304	0.33276	171.625	0.92014	174.739	2.62102	217.107	35.6677	171.625	0.92014	NA
Spot 98	502.409	6416.98	1.86509	17	2.30845	0.210041	3.28188	0.0269925	0.730814	0.222682	171.698	1.23823	193.587	5.78443	469.574	70.862	171.698	1.23823	NA
Spot 2	341.133	5522.98	1.78626	16.1287	2.63484	0.221452	4.57356	0.0271533	0.686118	0.150018	172.707	1.16924	203.117	8.41971	572.6	98.4187	172.707	1.16924	NA
Spot 79	956.233	6251.79	0.968094	18.1633	1.82629	0.19762	2.7421	0.0272008	1.24191	0.452904	173.005	2.12	183.11	4.59439	315.546	55.5866	173.005	2.12	NA
Spot 29	544.939	9979.15	1.73696	17.9338	1.9396	0.203984	3.08377	0.0272107	0.557384	0.180748	173.067	0.951815	188.492	5.30507	386.365	68.147	173.067	0.951815	NA
Spot 27	629.391	10565.4	1.43287	18.2573	1.65509	0.200443	2.75344	0.0272157	0.582686	0.211621	173.099	0.995201	185.501	4.6683	346.511	60.8714	173.099	0.995201	NA
Spot 81	1161.83	16512.9	0.713377	19.0968	1.27722	0.193943	2.08915	0.027336	0.854174	0.408862	173.854	1.46517	179.988	3.44581	261.308	43.8005	173.854	1.46517	NA
Spot 18	439.659	6568.57	1.8218	17.5958	2.0356	0.205864	2.65493	0.0273386	0.570071	0.214722	173.87	0.977936	190.076	4.60223	396.424	58.1574	173.87	0.977936	NA
Spot 91	876.019	13510.3	0.94703	18.5973	1.31167	0.19851	1.80838	0.0273923	0.569442	0.31489	174.207	0.978723	183.864	3.04132	309.85	39.0999	174.207	0.978723	NA
Spot 40	648.793	10103.9	1.42	18.6855	1.54621	0.197147	2.17806	0.0274312	0.586081	0.269084	174.451	1.00871	182.71	3.64204	290.868	47.9023	174.451	1.00871	NA
Spot 71	513.017	7483.97	1.1037	17.4461	2.22838	0.209845	2.56174	0.0274417	0.525029	0.20495	174.517	0.903974	193.422	4.51166	430.821	55.9018	174.517	0.903974	NA
Spot 112	446.659	7788.84	1.63099	17.7214	2.23853	0.206424	3.07184	0.0274423	0.628656	0.204651	174.521	1.08242	190.548	5.33695	394.032	67.4474	174.521	1.08242	NA
Spot 16	283.727	4280.2	2.41464	16.0844	2.94821	0.222689	6.25187	0.0274984	0.537631	0.0859952	174.872	0.927531	204.146	11.5622	557.261	135.954	174.872	0.927531	NA
Spot 59	628.692	9610.46	1.58011	18.198	1.87662	0.202506	2.86372	0.0275183	1.07319	0.374756	174.997	1.8528	187.245	4.89683	344.681	60.0724	174.997	1.8528	NA
Spot 88	561.298	7742.12	1.98835	17.9822	1.54571	0.203492	3.0336	0.0275297	0.744096	0.245284	175.069	1.28515	188.077	5.20831	354.717	66.42	175.069	1.28515	NA
Spot 70	547.919	7147.28	1.37111	17.611	1.52262	0.208408	2.93704	0.0275676	0.547008	0.186244	175.307	0.946021	192.216	5.14333	405.249	64.6298	175.307	0.946021	NA
Spot 11	420.961	5586.95	1.6983	16.9689	2.14942	0.213808	3.33369	0.0275777	0.602371	0.180692	175.37	1.04214	196.743	5.96258	461.426	72.709	175.37	1.04214	NA
Spot 108	182.618	2628.56	1.70695	13.2362	4.7583	0.26696	7.81027	0.0276188	0.760272	0.0973426	175.628	1.31723	240.26	16.7116	931.36	159.781	175.628	1.31723	NA
Spot 105	409.597	6437.96	1.30812	16.0977	2.41571	0.227893	3.32167	0.0276297	0.635184	0.191224	175.696	1.10092	208.458	6.25983	597.128	70.6401	175.696	1.10092	NA
Spot 85	393.002	5502.3	2.10427	16.4603	2.41384	0.22111	4.02105	0.0276536	0.630563	0.156816	175.846	1.09383	202.833	7.39316	529.413	87.0446	175.846	1.09383	NA
Spot 25	362.896	2704.95	1.35827	14.924	2.68131	0.235253	7.3398	0.0276604	0.793034	0.108046	175.889	1.376	214.526	14.1945	663.166	156.529	175.889	1.376	NA
Spot 66	451.49	6798.46	1.56462	17.1248	1.84441	0.215311	4.11709	0.0277155	0.829204	0.201406	176.235	1.44155	198	7.40639	465.906	89.3594	176.235	1.44155	NA
Spot 1	479.844	7514.77	1.3874	17.1685	2.03341	0.214556	2.93958	0.0277401	1.02738	0.349499	176.389	1.78761	197.369	5.27282	456.165	61.1206	176.389	1.78761	NA
Spot 103	481.372	2265.27	1.41359	15.7222	2.81491	0.218472	7.26139	0.0277462	0.700112	0.0964157	176.427	1.21844	200.637	13.2207	495.666	159.44	176.427	1.21844	NA
Spot 109	402.793	6665.38	1.59022	16.0316	2.65984	0.230904	2.96332	0.0277964	0.584391	0.197208	176.742	1.01883	210.945	5.64442	612.469	62.7806	176.742	1.01883	NA
Spot 43	217.396	3852.69	2.13634	13.9863	4.77655	0.260873	6.91284	0.0278877	0.634253	0.09175	177.315	1.1093	235.37	14.5236	863.825	142.936	177.315	1.1093	NA
Spot 54	228.537	3703.08	1.81264	14.0301	4.08538	0.258537	4.44394	0.0279242	0.500598	0.112647	177.544	0.876651	233.487	9.26972	842.418	91.9498	177.544	0.876651	NA
Spot 32	464.727	6702.03	1.33595	17.8136	1.83521	0.208377	2.76433	0.0279724	0.536098	0.193934	177.846	0.940396	192.19	4.84028	372.193	61.0602	177.846	0.940396	NA
Spot 8	224.292	3235.99	1.56786	15.2329	3.11781	0.235547	6.98508	0.0280166	0.615342	0.0880937	178.123	1.08106	214.768	13.5222	638.421	149.826	178.123	1.08106	NA
Spot 74	488.115	5325.17	1.23169	16.9275	2.07788	0.218346	4.92701	0.0280749	0.778749	0.158057	178.489	1.37091	200.532	8.966	468.362	107.775	178.489	1.37091	NA
Spot 119	247.909	4037.16	2.11775	14.7202	3.72982	0.250349	5.15892	0.0281658	0.734572	0.142389	179.059	1.29721	226.86	10.4886	756.895	107.811	179.059	1.29721	NA
Spot 104	250.534	4102.56	2.04667	14.9908	3.45639	0.245793	4.74356	0.0282348	0.634138	0.133684	179.491	1.12252	223.153	9.50323	712.83	99.9676	179.491	1.12252	NA
Spot 115	541.323	8280.77	1.58682	17.5576	2.42675	0.215967	3.4847	0.0283572	0.476731	0.136807	180.259	0.847445	198.548	6.28444	421.769	77.0814	180.259	0.847445	NA
Spot 102	1442.99	22569.7	0.621692	19.1644	1.00296	0.201299	1.69538	0.0283841	0.602037	0.355104	180.427	1.07118	186.225	2.88463	260.434	36.4145	180.427	1.07118	NA
Spot 39	525.219	9711.45	1.33845	17.5912	2.10599	0.21717	2.57775	0.028428	0.502359	0.194883	180.702	0.895169	199.552	4.67005	428.602	56.3814	180.702	0.895169	NA
Spot 23	452.445	3179.2	1.2519	16.8592	2.68056	0.215403	6.11391	0.0285534	0.545891	0.0892866	181.488	0.976911	198.076	11.0026	400.499	136.519	181.488	0.976911	NA
Spot 46	583.322	8417.63	1.42216	18.0144	1.70972	0.211385	2.66031	0.0285634	0.734335	0.276034	181.551	1.31459	194.714	4.71365	357.371	57.7097	181.551	1.31459	NA
Spot 49	463.84	8010.71	1.28284	17.501	2.36274	0.217222	3.33773	0.0285836	0.60779	0.182097	181.677	1.0888	199.595	6.04812	416.95	73.3347	181.677	1.0888	NA
Spot 47	137.463	2202.97	2.20443	13.0187	4.83076	0.278906	8.39607	0.0288229	0.637104	0.0758812	183.177	1.1506	249.79	18.5941	933.656	172.046	183.177	1.1506	NA
Spot 73	640.997	8936.72	2.68083	17.494	1.52377	0.220925	1.99817	0.0288264	0.673768	0.337193	183.199	1.21696	202.68	3.6713	435.791	41.8896	183.199	1.21696	NA
Spot 68	229.623	4010.37	1.14737	13.8643	3.85701	0.274087	4.45401	0.0289707	0.597265	0.134096	184.103	1.08403	245.956	9.72934	887.252	91.254	184.103	1.08403	NA
Spot 10	333.175	4585.96	1.63961	16.4517	2.7699	0.229784	6.01673	0.0290196	0.62409	0.103726	184.409	1.13457	210.021	11.4156	508.05	131.725	184.409	1.13457	NA
Spot 4	730.326	8422.82	0.615493	18.3244	1.51853	0.215475	2.45892	0.0296711	0.598391	0.243355	188.49	1.11157	198.136	4.42617	314.607	54.2367	188.49	1.11157	NA
Spot 64	541.001	7154.66	1.54038	18.1439	1.65936	0.218441	2.24917	0.0298039	0.600294	0.266896	189.321	1.11996	200.612	4.09435	335.511	49.1244	189.321	1.11996	NA
Spot 37	482.291	3433.84	1.56698	16.3676	2.17394	0.241201	3.70009	0.0307278	0.53279	0.143994	195.102	1.02391	219.404	7.30109	488.845	80.8188	195.102	1.02391	NA
Spot 106	403.401	6818.88	2.03854	17.0434	2.6322	0.250671	3.70251	0.0321809	0.80019	0.216121	204.183	1.60825	227.121	7.53519	471.847	80.0214	204.183	1.60825	NA
Spot 51	275.356	3206.58	1.99777	13.3937	3.69725	0.319678	5.28647	0.0331058	0.64908	0.122781	209.957	1.34084	281.655	13.0036	929.356	107.761	209.957	1.34084	NA
Spot 19	1881.39	39350.3	2.12654	19.7425	0.755847	0.241469	1.10085	0.0348561	0.580404	0.52723	220.87	1.26022	219.622	2.17413	206.262	21.7194	220.87	1.26022	NA
Spot 17	1115.36	24073.3	2.77342	19.2138	0.971921	0.272734	1.36393	0.0384832	0.691091	0.506691	243.424	1.65092	244.878	2.96774	258.809	27.0292	243.424	1.65092	NA
Spot 60	124.289	12193.4	1.67318	13.4231	1.51653	1.65611	1.72025	0.163965	0.6251	0.363378	978.774	5.67648	991.89	10.8913	1021	32.4515	1021	32.4515	95.8645
Spot 75	209.243	20839	1.38814	13.2539	1.10179	1.92999	1.46619	0.186984	0.881912	0.6015	1105.02	8.95579	1091.53	9.80667	1064.75	23.5751	1064.75	23.5751	103.782
Spot 94	162.53	15363.9	1.60405	13.1561	1.00974	1.90862	1.23793	0.184803	0.542597	0.438311	1093.16	5.45579	1084.1	8.24834	1065.97	22.3897	1065.97	22.3897	102.551
Spot 38	73.5509	8182.03	2.65684	13.0114	2.15839	1.92794	2.84765	0.186012	0.679486	0.238613	1099.73	6.86989	1090.82	19.0414	1073.1	55.556	1073.1	55.556	102.482
Spot 36	479.511	51928.4	2.81951	13.054	0.595411	2.01793	0.872322	0.191472	0.539755	0.618757	1129.35	5.59161	1121.56	5.92255	1106.51	13.7136	1106.51	13.7136	102.064
Spot 72	148.792	17199.5	1.54339	12.2829	0.944355	2.34878	1.21007	0.211015	0.588252	0.486129	1234.22	6.60762	1227.19	8.61802	1214.83	20.8032	1214.83	20.8032	101.596
Spot 63	269.4	42511	1.3503	11.0076	0.630027	3.21203	0.858318	0.25693	0.568622	0.662484	1474.11	7.49282	1460.06	6.64618	1439.66	12.2556	1439.66	12.2556	102.393
Spot 53	340.541	5974.21	3.80088	9.36166	0.871617	4.3136	2.1539	0.299974	0.66225	0.307465	1691.18	9.85122	1695.96	17.7562	1701.87	37.7528	1701.87	37.7528	99.3723
Spot 76	363.172	40098.9	2.57693	9.40894	0.626679	4.57497	0.889857	0.312815	0.600409	0.674725	1754.54	9.22252	1744.72	7.41487	1732.95	12.0482	1732.95	12.0482	101.246
Spot 69	142.701	28426	4.14453	9.27461	0.71401	4.63702	0.93587	0.312781	0.564179	0.602839	1754.38	8.66529	1755.96	7.81706	1757.82	13.6574	1757.82	13.6574	99.8041
Spot 21	630.284	116695	1.94111	8.97791	0.566388	5.04732	0.82686	0.329225	0.598826	0.724218	1834.62	9.56122	1827.3	7.00756	1818.95	10.3486	1818.95	10.3486	100.862
Spot 95	638.213	68489.4	2.69461	7.98738	0.674525	5.71883	0.905256	0.332609	0.599192	0.661903	1851.02	9.64086	1934.22	7.82391	2024.55	12.0214	2024.55	12.0214	91.4286
Spot 65	296.531	86127.5	1.29993	5.32812	0.618307	13.7221	0.872279	0.529773	0.614342	0.704296	2740.5	13.7149	2730.72	8.25555	2723.48	10.2032	2723.48	10.2032	100.625
MR19DV-8
Spot 59	91.6769	225.615	1.19338	4.59069	15.1465	0.0719953	18.626	0.0032299	0.525456	0.0282108	20.7877	0.109054	70.5911	12.7023	2473.86	317.262	20.7877	0.109054	NA
Spot 145	183.17	435.977	1.72371	5.28742	13.3732	0.0740756	20.3471	0.00336566	0.659086	0.0323922	21.66	0.142519	72.5597	14.2495	2452.43	347.935	21.66	0.142519	NA
Spot 51	276.49	756.631	0.74173	6.7222	13.487	0.0636946	14.9583	0.00352312	0.633905	0.0423783	22.6716	0.143464	62.6982	9.09511	2113.78	263.628	22.6716	0.143464	NA
Spot 36	180.929	436.182	1.34439	5.032	18.3417	0.0835362	20.2375	0.003564	0.542221	0.0267928	22.9342	0.124133	81.4641	15.8436	2558.31	342.483	22.9342	0.124133	NA
Spot 40	571.321	1168.25	0.919312	8.98838	6.7869	0.049162	9.79674	0.00359334	0.697476	0.0711947	23.1227	0.160986	48.73	4.66124	1610.43	182.532	23.1227	0.160986	NA
Spot 67	105.69	238.272	1.35131	4.66249	11.6773	0.0799688	19.2488	0.00359677	1.04845	0.0544683	23.1447	0.242225	78.1156	14.4735	2469.56	327.866	23.1447	0.242225	NA
Spot 141	137.362	320.633	1.20652	4.38927	20.9099	0.094877	23.1377	0.00362987	0.604713	0.0261354	23.3573	0.140989	92.0364	20.3612	2739.13	386.356	23.3573	0.140989	NA
Spot 19	173.646	396.817	0.96144	6.02455	13.4752	0.0665502	17.0497	0.00363331	0.547835	0.0321316	23.3794	0.127848	65.4205	10.8027	2136.66	300.389	23.3794	0.127848	NA
Spot 112	258.034	158.619	1.96201	4.76105	10.814	0.0642141	32.6139	0.00369394	0.581656	0.0178346	23.7688	0.137998	63.194	19.9843	2044.74	593.515	23.7688	0.137998	NA
Spot 98	266.342	672.282	1.53585	6.9899	11.4778	0.0630871	16.586	0.00371828	0.550208	0.033173	23.9251	0.131394	62.1181	9.99442	2001.74	296.569	23.9251	0.131394	NA
Spot 70	259.137	748.054	0.953933	6.17501	10.0274	0.0743301	12.8574	0.00373326	0.42933	0.0333917	24.0213	0.102939	72.8002	9.03277	2281.41	222.226	24.0213	0.102939	NA
Spot 47	241.157	553.355	1.78964	6.42335	13.7883	0.0684398	18.4934	0.00377514	0.710814	0.0384361	24.2903	0.172334	67.2178	12.0289	2118.63	326.856	24.2903	0.172334	NA
Spot 87	140.875	327.169	0.792083	4.62726	15.7912	0.0926955	19.4113	0.00377762	0.602772	0.0310526	24.3062	0.146235	90.0113	16.7218	2634.73	325.756	24.3062	0.146235	NA
Spot 114	208.917	479.719	0.82376	6.6922	8.90497	0.0633885	18.174	0.00378885	0.644521	0.035464	24.3784	0.156827	62.406	11.0006	1976.77	326.362	24.3784	0.156827	NA
Spot 13	463.155	561.829	0.720858	9.03873	8.40582	0.0446764	24.3038	0.00379066	0.577892	0.0237779	24.39	0.140681	44.3795	10.554	1327.26	477.436	24.39	0.140681	NA
Spot 144	384.024	941.119	0.706221	8.9611	8.96991	0.0506004	10.9023	0.00379883	0.526678	0.0483089	24.4424	0.128489	50.1211	5.33173	1560.38	204.862	24.4424	0.128489	NA
Spot 45	378.971	894.247	1.1882	8.3014	7.03629	0.0552205	9.46443	0.0038191	0.520146	0.054958	24.5726	0.12757	54.5766	5.02904	1712.76	174.203	24.5726	0.12757	NA
Spot 128	1423.66	2045.13	1.0594	14.1966	3.94206	0.0334072	11.2851	0.00382776	0.650658	0.0576565	24.6282	0.15994	33.3669	3.7043	719.184	239.862	24.6282	0.15994	NA
Spot 55	307.95	772.727	0.866162	7.12435	11.8367	0.0650773	12.2642	0.00383749	0.54485	0.0444261	24.6907	0.13427	64.0173	7.60896	2000.85	218.488	24.6907	0.13427	NA
Spot 83	212.097	498.834	1.14111	6.19203	14.5462	0.0712842	17.0698	0.00383781	0.573939	0.0336231	24.6928	0.14145	69.9174	11.5336	2161.04	299.923	24.6928	0.14145	NA
Spot 1	566.149	1307.75	1.3989	10.4992	7.06605	0.0447723	8.38013	0.00384111	0.531512	0.0634252	24.714	0.131106	44.4727	3.64645	1305.79	162.669	24.714	0.131106	NA
Spot 136	437.465	1104.92	0.761236	7.64256	8.75485	0.0629027	10.7952	0.00384826	0.622771	0.0576899	24.7599	0.153902	61.942	6.48695	1935.25	193.491	24.7599	0.153902	NA
Spot 64	416.805	1141.2	1.45589	8.05909	10.9658	0.0595242	11.5626	0.00385178	0.612943	0.0530109	24.7825	0.151611	58.7093	6.59588	1834.2	209.915	24.7825	0.151611	NA
Spot 17	226.426	583.613	1.53548	5.39918	13.468	0.0871483	17.73	0.00386871	0.588091	0.0331692	24.8912	0.146101	84.8434	14.4324	2491.64	301.144	24.8912	0.146101	NA
Spot 105	879.806	1773.19	0.795811	12.6525	4.74485	0.0378265	9.9434	0.00387178	0.717286	0.0721368	24.9109	0.178338	37.6998	3.67992	954.208	203.301	24.9109	0.178338	NA
Spot 5	306.132	695.516	1.02517	6.50084	10.9608	0.072144	11.5548	0.00387768	0.452111	0.0391277	24.9488	0.112578	70.7319	7.8949	2163.93	202.052	24.9488	0.112578	NA
Spot 102	1011.72	2139.61	1.06513	13.156	4.21182	0.0370449	10.113	0.00387789	0.521386	0.0515561	24.9501	0.129835	36.9348	3.6681	908.079	208.534	24.9501	0.129835	NA
Spot 79	558.307	454.208	1.0761	9.16884	6.30567	0.041483	26.0541	0.00388451	0.681	0.026138	24.9926	0.16987	41.2709	10.5375	1133.7	527.22	24.9926	0.16987	NA
Spot 126	1143.82	2161.8	1.35424	13.6715	4.00189	0.0355582	6.65551	0.00388466	0.46776	0.0702816	24.9936	0.116684	35.4781	2.32048	819.542	138.816	24.9936	0.116684	NA
Spot 122	2841.95	1137.66	0.842328	15.4169	2.74727	0.0278197	10.5277	0.00389406	0.621379	0.0590233	25.054	0.155378	27.8618	2.89334	278.234	241.207	25.054	0.155378	NA
Spot 16	319.633	822.031	0.935383	7.79282	13.0458	0.0599573	13.6393	0.00389486	0.603554	0.044251	25.0591	0.150952	59.1243	7.83403	1827.18	248.275	25.0591	0.150952	NA
Spot 116	510.529	1320.16	1.62212	9.43032	7.52596	0.05128	10.0758	0.00389891	0.483561	0.0479924	25.0851	0.121066	50.7777	4.99047	1536.59	189.844	25.0851	0.121066	NA
Spot 88	1992.43	4872.43	1.64841	17.2391	2.44555	0.0295346	4.50425	0.00389935	0.728516	0.161739	25.0879	0.182414	29.5546	1.31203	410.477	99.432	25.0879	0.182414	NA
Spot 72	220.187	502.686	0.873156	6.4516	12.2213	0.0690607	16.9982	0.00389984	0.64053	0.0376822	25.0911	0.160404	67.8077	11.1501	2077.41	301.394	25.0911	0.160404	NA
Spot 8	322.394	813.709	0.782545	7.53076	9.27755	0.0624717	12.9046	0.0039031	0.604948	0.0468786	25.112	0.151619	61.5302	7.70457	1897.54	232.774	25.112	0.151619	NA
Spot 130	1513.28	3699.04	1.67118	14.7393	3.5838	0.0344434	6.68357	0.00390981	0.554189	0.082918	25.1551	0.139135	34.3844	2.25964	738.971	141.101	25.1551	0.139135	NA
Spot 148	865.707	2035.26	1.16574	13.3578	4.78035	0.036472	6.061	0.00391298	0.721682	0.11907	25.1755	0.181332	36.3737	2.16559	857.218	125.036	25.1755	0.181332	NA
Spot 109	369.634	840.651	0.809361	8.03414	9.07721	0.058476	16.261	0.00392119	0.539675	0.0331883	25.2282	0.135884	57.7043	9.1219	1769.4	298.842	25.2282	0.135884	NA
Spot 12	2994	5963.13	0.604379	17.3819	1.85587	0.0296213	3.59315	0.00392176	0.664703	0.184992	25.2319	0.167389	29.6402	1.04962	404.209	79.0838	25.2319	0.167389	NA
Spot 66	621.089	1634.47	1.26607	11.1916	6.5927	0.0436862	11.672	0.00393059	0.709569	0.0607925	25.2886	0.179088	43.4166	4.96081	1212.8	230.007	25.2886	0.179088	NA
Spot 42	1664.68	4585.96	1.17829	14.9868	3.8374	0.0343826	5.19244	0.00393118	0.611509	0.117769	25.2923	0.154362	34.3247	1.7525	723.681	109.45	25.2923	0.154362	NA
Spot 23	548.795	1417.48	0.746468	10.7837	9.08392	0.044879	10.2197	0.00393326	0.641038	0.0627257	25.3057	0.161901	44.5764	4.45706	1264.26	199.713	25.3057	0.161901	NA
Spot 117	2342.3	5079.44	1.04895	16.9857	2.57401	0.0303303	5.38446	0.00393423	0.543111	0.100866	25.3119	0.137202	30.339	1.60943	449.875	119.064	25.3119	0.137202	NA
Spot 146	523.209	1255.06	1.71901	8.58745	8.03594	0.0571239	10.8937	0.00393645	0.600787	0.0551497	25.3261	0.151858	56.4064	5.97728	1719.43	200.492	25.3261	0.151858	NA
Spot 29	724.504	1761.22	1.71316	12.1762	6.36144	0.0401235	7.68948	0.00394085	0.625155	0.0813	25.3544	0.158193	39.9446	3.01191	1038.03	154.964	25.3544	0.158193	NA
Spot 115	707.749	1606.36	0.664184	12.0702	5.75253	0.0402343	13.1837	0.0039513	0.606331	0.0459908	25.4215	0.153835	40.0528	5.17771	1038.26	267.016	25.4215	0.153835	NA
Spot 57	441.312	1197.21	0.825608	9.17164	8.06629	0.0531015	9.50381	0.00395377	0.549356	0.0578038	25.4374	0.139467	52.5355	4.86595	1575.87	178.001	25.4374	0.139467	NA
Spot 63	608.54	1659.78	1.40148	9.74838	6.9963	0.0515306	8.78834	0.00397336	0.524159	0.0596425	25.5632	0.133726	51.0198	4.37303	1510.13	165.961	25.5632	0.133726	NA
Spot 132	909.521	2289.6	1.52033	13.1931	4.81442	0.0380673	8.45168	0.00397374	0.587046	0.0694591	25.5656	0.149785	37.9353	3.14703	913.858	173.803	25.5656	0.149785	NA
Spot 43	242.879	657.635	1.12778	6.48377	11.2456	0.0734068	13.3025	0.00397493	0.515231	0.0387318	25.5733	0.1315	71.9272	9.23737	2150.98	233.222	25.5733	0.1315	NA
Spot 123	177.346	531.594	1.0266	5.52603	15.3479	0.0859258	16.3481	0.00397661	0.576136	0.0352417	25.584	0.147107	83.701	13.1355	2421.25	279.254	25.584	0.147107	NA
Spot 111	638.308	1425.97	0.956862	11.781	7.03591	0.0410257	9.57566	0.00397684	0.562145	0.0587056	25.5855	0.143542	40.825	3.83173	1064.56	192.681	25.5855	0.143542	NA
Spot 15	183.778	546.613	1.22725	5.65137	15.0851	0.084107	16.7488	0.00397858	0.630896	0.0376681	25.5967	0.161168	81.9989	13.1947	2384.03	287.267	25.5967	0.161168	NA
Spot 49	1067.85	2990.92	0.624054	13.3169	5.94937	0.0385479	6.37664	0.00398282	0.577144	0.0905091	25.6239	0.147593	38.4054	2.40324	934.99	130.406	25.6239	0.147593	NA
Spot 50	664.376	1110.75	1.09785	11.4584	5.58703	0.0408136	10.0229	0.00398294	0.569978	0.0568676	25.6247	0.145765	40.6181	3.99078	1051.04	202.118	25.6247	0.145765	NA
Spot 54	1478.8	3648.77	1.5525	15.9255	2.41589	0.0322735	2.91506	0.00398333	0.534737	0.183439	25.6272	0.136766	32.2523	0.9254	559.274	62.4709	25.6272	0.136766	NA
Spot 25	4438.97	10921.3	0.828926	19.1633	1.34049	0.0278527	2.88476	0.00398348	0.686698	0.238043	25.6282	0.175639	27.8945	0.793736	228.717	64.7544	25.6282	0.175639	NA
Spot 92	283.625	685.717	1.32412	5.73851	13.1041	0.085455	14.0126	0.00398652	0.583885	0.0416686	25.6477	0.149455	83.2607	11.2019	2407.69	239.157	25.6477	0.149455	NA
Spot 110	2330.69	4849.39	1.2779	16.8986	2.05332	0.0308596	2.63993	0.00398834	0.560221	0.21221	25.6593	0.143463	30.8605	0.802442	457.982	57.2315	25.6593	0.143463	NA
Spot 46	262.305	671.185	1.07525	6.2083	12.9284	0.0777231	18.4679	0.00398905	0.640748	0.0346952	25.6639	0.164114	76.002	13.5243	2244.09	322.009	25.6639	0.164114	NA
Spot 58	1852.24	3999.08	1.43152	15.1269	2.86448	0.0344741	4.1905	0.00400351	0.493515	0.11777	25.7567	0.12686	34.4146	1.41798	690.555	88.7883	25.7567	0.12686	NA
Spot 95	932.142	2411.76	1.10893	11.3807	5.1928	0.0452643	7.26175	0.00400375	0.603725	0.0831377	25.7583	0.155199	44.9507	3.19302	1246.27	141.894	25.7583	0.155199	NA
Spot 37	1834.25	3062.64	1.53307	15.7208	3.0958	0.0324868	6.83459	0.00400623	0.5853	0.0856379	25.7742	0.150555	32.462	2.18356	561.131	148.554	25.7742	0.150555	NA
Spot 34	514.968	1297.12	1.00347	9.25005	7.35201	0.0537869	9.98683	0.00400648	0.776541	0.0777565	25.7758	0.19976	53.1962	5.17589	1575.09	186.857	25.7758	0.19976	NA
Spot 139	1221.92	2946.66	1.69053	14.8127	3.70928	0.0345456	4.93024	0.004011	0.854668	0.173352	25.8049	0.220105	34.4847	1.67163	691.009	103.599	25.8049	0.220105	NA
Spot 6	731.034	1528.2	0.550265	10.1088	7.19563	0.0497019	7.99833	0.00401537	0.531088	0.0663998	25.8329	0.136921	49.2524	3.84537	1421.52	152.722	25.8329	0.136921	NA
Spot 131	1155.6	2665.05	0.741127	14.2893	3.71242	0.0357375	7.21085	0.00401751	0.571369	0.0792374	25.8466	0.147384	35.6539	2.52634	759.482	151.798	25.8466	0.147384	NA
Spot 52	1405.27	3330.12	0.616938	14.9569	3.99696	0.0345768	5.08423	0.00401768	0.561324	0.110405	25.8478	0.144799	34.5154	1.72535	689.366	107.858	25.8478	0.144799	NA
Spot 26	140.88	330.634	1.17308	5.66339	15.1442	0.0757092	17.6601	0.00401926	0.584212	0.0330809	25.8579	0.150762	74.1028	12.6211	2185.48	309.646	25.8579	0.150762	NA
Spot 71	1296.69	3009.21	0.563116	15.1875	3.2346	0.0337751	7.56912	0.00402067	0.600399	0.0793222	25.8669	0.154994	33.7282	2.511	637.548	162.552	25.8669	0.154994	NA
Spot 22	480.808	1437.97	1.09537	8.967	7.71135	0.0566955	8.65466	0.00403109	0.543846	0.0628385	25.9339	0.140757	55.9949	4.715	1661.73	160.196	25.9339	0.140757	NA
Spot 137	275.351	738.498	1.17534	7.01482	8.67024	0.069483	11.1138	0.00405209	0.642561	0.0578163	26.0687	0.167169	68.2087	7.33173	2020.53	197.268	26.0687	0.167169	NA
Spot 118	1016.96	3042.88	0.735207	14.0882	3.65429	0.0370484	4.91773	0.00406493	0.594345	0.120858	26.1511	0.155113	36.9382	1.78388	810.498	102.169	26.1511	0.155113	NA
Spot 84	680.991	1512.45	1.33324	12.9802	5.2226	0.0377174	6.93747	0.00406519	0.552534	0.0796449	26.1528	0.14421	37.5931	2.56032	847.709	143.949	26.1528	0.14421	NA
Spot 28	1356.82	3453.81	1.07805	15.0775	3.41363	0.034791	3.85515	0.004073	0.622671	0.161517	26.2029	0.162827	34.7256	1.31609	673.348	81.3993	26.2029	0.162827	NA
Spot 127	516.172	1349.75	1.53095	10.614	6.09728	0.0470818	8.88577	0.00408154	0.642927	0.0723547	26.2577	0.168475	46.7148	4.05695	1285.53	172.897	26.2577	0.168475	NA
Spot 125	292.242	706.403	0.91746	6.13555	10.3009	0.0813546	15.2174	0.00408462	0.58026	0.0381314	26.2775	0.152167	79.4177	11.6253	2282.02	263.431	26.2775	0.152167	NA
Spot 134	141.083	357.828	1.35218	5.05227	16.012	0.0917623	18.2199	0.00409581	0.556877	0.0305642	26.3493	0.146434	89.1437	15.5505	2482.44	309.928	26.3493	0.146434	NA
Spot 9	709.698	1944.99	0.935824	12.6763	5.49795	0.0403496	6.5016	0.00409614	0.656149	0.100921	26.3515	0.172552	40.1653	2.56042	971.005	132.065	26.3515	0.172552	NA
Spot 32	213.246	578.599	1.1111	5.07283	14.9238	0.099429	15.5518	0.00411317	0.666591	0.0428628	26.4608	0.176024	96.2491	14.2818	2609.81	260.489	26.4608	0.176024	NA
Spot 133	338.886	974.752	0.775442	8.63631	7.70051	0.0576573	15.1507	0.00411629	0.646848	0.0426943	26.4808	0.170939	56.9187	8.3865	1654.14	282.131	26.4808	0.170939	NA
Spot 147	174.426	408.164	1.37229	4.74723	12.6717	0.102209	20.1422	0.00411714	0.584603	0.0290237	26.4863	0.154522	98.8132	18.9676	2654.03	337.708	26.4863	0.154522	NA
Spot 44	427.047	1239.66	0.902316	8.14935	8.54225	0.0633364	11.3673	0.00412114	0.573755	0.050474	26.512	0.151802	62.3562	6.87509	1824.2	206.624	26.512	0.151802	NA
Spot 80	593.398	1429.26	1.21946	10.8259	8.61414	0.0467407	11.6626	0.0041212	0.561529	0.0481477	26.5124	0.148569	46.384	5.28794	1252.46	228.678	26.5124	0.148569	NA
Spot 106	249.863	744.19	1.03838	4.99124	18.0116	0.105021	18.5163	0.00414666	0.63809	0.0344609	26.6758	0.169864	101.4	17.8704	2687.14	308.874	26.6758	0.169864	NA
Spot 86	599.524	1596.08	1.47275	10.8307	5.88613	0.047889	8.01269	0.0041739	0.637992	0.0796227	26.8507	0.170949	47.4973	3.71818	1275.05	156.006	26.8507	0.170949	NA
Spot 48	482.323	1252.42	1.20266	9.65168	7.87484	0.053406	9.54181	0.00419525	0.671199	0.0703429	26.9877	0.180763	52.8291	4.912	1474.94	180.977	26.9877	0.180763	NA
Spot 41	656.669	1577.02	0.921957	11.1606	8.56397	0.046579	10.0808	0.00419902	0.518898	0.0514739	27.012	0.139871	46.2271	4.55561	1208.98	198.698	27.012	0.139871	NA
Spot 149	132.231	341.164	1.16847	5.04031	18.5714	0.0931974	22.9145	0.0042032	0.537234	0.0234451	27.0388	0.144957	90.4775	19.8382	2464.95	392.684	27.0388	0.144957	NA
Spot 143	689.856	1702.03	0.978705	12.4683	5.2098	0.0417911	7.66993	0.00423676	0.622959	0.081221	27.2542	0.169424	41.5713	3.12411	973.773	156.07	27.2542	0.169424	NA
Spot 24	1466.34	4172	1.91382	14.6903	4.08428	0.0377998	5.89912	0.00425377	0.817662	0.138607	27.3634	0.223266	37.6737	2.1817	757.291	123.351	27.3634	0.223266	NA
Spot 93	208.373	512.17	1.43836	6.97776	15.294	0.0688649	23.0966	0.00427325	0.598076	0.0258945	27.4885	0.164052	67.6217	15.1107	1909.81	420.458	27.4885	0.164052	NA
Spot 129	1327.94	3947.55	1.78117	13.8682	4.42134	0.0404608	4.99922	0.00428903	0.603101	0.120639	27.5897	0.166038	40.2739	1.97398	882.182	102.716	27.5897	0.166038	NA
Spot 4	934.226	1102.64	2.37422	11.6784	5.27112	0.0434555	12.3501	0.00433783	0.554363	0.0448874	27.903	0.154349	43.1922	5.22245	1005.23	251.285	27.903	0.154349	NA
Spot 100	288.86	897.747	2.10765	7.41543	10.31	0.0720542	10.845	0.00435907	0.7373	0.0679851	28.0393	0.206285	70.6469	7.40134	1955.27	193.805	28.0393	0.206285	NA
Spot 27	263.16	769.1	0.832286	7.30755	10.0907	0.0731153	13.0032	0.00445273	0.490113	0.0376918	28.6404	0.140059	71.6514	8.99608	1943.4	233.39	28.6404	0.140059	NA
Spot 91	416.697	1068.66	2.27245	9.5164	7.62265	0.0569505	8.28554	0.00449355	0.513556	0.0619822	28.9024	0.148098	56.2399	4.53311	1466.53	157.326	28.9024	0.148098	NA
Spot 90	349.985	1018.68	1.47397	9.39464	7.67228	0.0574321	11.3138	0.00449563	0.57096	0.050466	28.9157	0.164727	56.7025	6.23942	1481.63	214.85	28.9157	0.164727	NA
Spot 7	1012.41	2871.34	1.74589	13.4027	4.02598	0.0437214	7.00129	0.00455537	0.467859	0.0668247	29.2991	0.136768	43.4509	2.97796	917.776	143.86	29.2991	0.136768	NA
Spot 97	1034.37	3631.95	2.21427	13.5544	4.1218	0.044227	6.25016	0.00459473	0.623387	0.0997395	29.5517	0.1838	43.9426	2.68791	923.726	127.924	29.5517	0.1838	NA
Spot 85	349.342	920.477	1.44351	8.10259	10.6789	0.0707059	11.5348	0.00473758	0.733627	0.0636014	30.4683	0.222996	69.3691	7.7345	1770.82	210.907	30.4683	0.222996	NA
Spot 73	660.043	1755.47	0.790878	11.0596	5.51686	0.0624149	10.5081	0.0055036	0.741252	0.0705408	35.3812	0.261546	61.4758	6.26837	1252.32	205.621	35.3812	0.261546	NA
Spot 74	1634.22	16802.7	3.96467	19.5851	1.29728	0.114754	1.83393	0.0166227	0.579644	0.316067	106.276	0.610973	110.305	1.9169	199.172	40.4022	106.276	0.610973	NA
Spot 33	723.498	6279.37	1.23829	18.1843	1.31815	0.170719	1.81689	0.0235484	0.495627	0.272789	150.043	0.735067	160.042	2.69022	311.693	39.7847	150.043	0.735067	NA
Spot 142	271.944	5179.47	1.21891	16.3501	2.70013	0.198547	4.1518	0.0247533	0.6547	0.157691	157.627	1.01947	183.896	6.98364	537.268	89.7447	157.627	1.01947	NA
Spot 121	188.296	2865.88	1.91438	13.7202	4.55256	0.233439	6.11377	0.0250113	0.529251	0.086567	159.25	0.832505	213.034	11.7494	860.02	126.498	159.25	0.832505	NA
Spot 2	362.634	5593.87	1.46273	16.6552	2.1841	0.200001	3.38368	0.025236	0.519302	0.153472	160.663	0.824016	185.127	5.7263	510.938	73.5317	160.663	0.824016	NA
Spot 99	272.318	4185.33	1.20506	14.9544	3.22789	0.221684	4.03694	0.0253578	0.565001	0.139958	161.428	0.900748	203.31	7.43815	722.739	84.8147	161.428	0.900748	NA
Spot 89	480.309	7965.85	1.15045	17.6457	1.9152	0.191562	3.04616	0.0253685	0.533229	0.175049	161.496	0.850445	177.961	4.97254	403.641	67.1676	161.496	0.850445	NA
Spot 61	312.024	4829.92	1.27936	15.2884	2.4353	0.219527	3.98373	0.0255371	0.815115	0.204611	162.556	1.30845	201.516	7.28155	686.98	83.2451	162.556	1.30845	NA
Spot 104	1523.83	22913.5	1.62619	19.6204	0.898041	0.178612	1.2652	0.0257747	0.62924	0.497346	164.049	1.01924	166.865	1.94683	207.982	25.4753	164.049	1.01924	NA
Spot 65	264.341	3193.01	1.2744	14.8268	3.81243	0.223588	6.15938	0.0258014	0.900544	0.146207	164.217	1.46017	204.892	11.4287	704.101	129.762	164.217	1.46017	NA
Spot 21	827.115	11589.1	1.35436	18.8526	1.19319	0.185172	1.73266	0.025925	0.540916	0.312189	164.993	0.881151	172.502	2.74877	277.753	37.6921	164.993	0.881151	NA
Spot 53	371.251	6451	1.00899	17.1105	2.22678	0.2007	4.53255	0.0259416	0.522181	0.115207	165.098	0.851164	185.719	7.69298	457.722	99.9376	165.098	0.851164	NA
Spot 56	497.624	8064.64	1.73866	17.5311	1.90341	0.197598	2.94366	0.0259652	0.708773	0.24078	165.246	1.15634	183.092	4.93165	421.033	63.8032	165.246	1.15634	NA
Spot 62	321.054	5118.49	1.64018	15.9789	2.48951	0.215025	4.62215	0.0261301	0.622581	0.134695	166.282	1.022	197.761	8.30591	593.007	99.3237	166.282	1.022	NA
Spot 82	796.456	12391.6	2.14555	19.1836	1.32048	0.186088	2.61917	0.0266075	0.549373	0.209751	169.281	0.917878	173.286	4.17251	229.293	59.1626	169.281	0.917878	NA
Spot 78	661.642	7385.96	1.04113	17.8629	1.62273	0.197934	2.95391	0.0266671	0.578088	0.195703	169.655	0.96796	183.377	4.95585	365.008	65.2961	169.655	0.96796	NA
Spot 101	302.105	4043.9	1.06676	15.1754	3.00402	0.23273	4.8495	0.0270909	0.521731	0.107585	172.316	0.887115	212.45	9.29658	685.566	102.969	172.316	0.887115	NA
Spot 119	522.252	9028.63	1.63165	17.7764	1.81135	0.203867	3.11214	0.0271339	0.535707	0.172135	172.586	0.912287	188.393	5.35132	392.396	68.7808	172.586	0.912287	NA
Spot 120	479.167	9078.94	1.3142	17.2413	1.97785	0.210886	2.86452	0.0271931	0.660759	0.23067	172.957	1.12763	194.296	5.06559	463.063	61.7808	172.957	1.12763	NA
Spot 14	509.668	8268.28	1.3468	17.4924	2.05758	0.207568	3.2693	0.0272137	0.493039	0.150809	173.086	0.842028	191.51	5.70609	426.074	72.0806	173.086	0.842028	NA
Spot 35	546.8	7439.19	1.40878	17.6898	1.77263	0.204775	3.09857	0.0272381	0.522123	0.168504	173.24	0.892477	189.159	5.34769	393.765	68.5267	173.24	0.892477	NA
Spot 39	394.981	4879.53	1.0148	16.8999	2.04676	0.210862	2.78769	0.0272789	0.615732	0.220875	173.495	1.05402	194.275	4.92925	455.815	60.3393	173.495	1.05402	NA
Spot 76	493.797	7052.98	1.73607	17.7615	2.03262	0.203522	2.62074	0.0273054	0.560269	0.213783	173.661	0.959981	188.102	4.50002	374.44	57.6294	173.661	0.959981	NA
Spot 18	802.182	11679.9	1.19268	18.8683	1.36201	0.19463	1.88924	0.0273171	0.500086	0.264702	173.735	0.857222	180.572	3.12533	271.997	41.7622	173.735	0.857222	NA
Spot 108	455.189	2965.98	1.63613	17.6289	2.07022	0.195118	4.51875	0.0273574	0.536274	0.118678	173.988	0.920573	180.987	7.49106	274.363	102.844	173.988	0.920573	NA
Spot 3	482.072	7726.39	1.50502	17.4445	1.66	0.209288	2.27844	0.027382	0.547471	0.240283	174.142	0.940616	192.955	4.00391	430.726	49.2956	174.142	0.940616	NA
Spot 96	826.001	13067.6	1.46235	18.902	1.38903	0.196366	1.97287	0.0275085	0.842318	0.42695	174.936	1.4537	182.047	3.28801	276.39	40.8405	174.936	1.4537	NA
Spot 107	3145.37	8247.46	2.08625	18.9059	0.936641	0.218743	1.44914	0.0310793	0.840559	0.580038	197.299	1.6333	200.863	2.64097	243.924	27.1741	197.299	1.6333	NA
Spot 140	920.14	16011.3	1.81843	19.5983	0.975785	0.233488	1.33869	0.0338641	0.543277	0.405827	214.687	1.14714	213.074	2.573	196.31	28.4448	214.687	1.14714	NA
Spot 138	1852.1	34136.1	2.94119	19.3243	1.16044	0.242786	1.64025	0.0343813	1.02712	0.6262	217.911	2.20081	220.699	3.25363	251.56	29.4221	217.911	2.20081	NA
Spot 150	2298.18	45679.4	2.83953	19.5014	0.716676	0.241586	0.969112	0.0344979	0.611714	0.631211	218.638	1.31501	219.719	1.9147	232.295	17.3614	218.638	1.31501	NA
Spot 113	1529.26	29927.7	2.73592	19.4265	0.895027	0.242649	1.14713	0.0345551	0.627228	0.54678	218.994	1.35052	220.587	2.27443	238.599	22.1372	218.994	1.35052	NA
Spot 77	2621.62	65572.4	2.20917	19.6599	0.65159	0.240601	0.941292	0.0345664	0.54473	0.578704	219.065	1.17326	218.912	1.85362	218.297	17.7573	219.065	1.17326	NA
Spot 10	2035.94	41942	3.32146	19.5173	0.710885	0.243205	0.939452	0.0347016	0.58284	0.620404	219.907	1.26009	221.041	1.8661	234.163	16.999	219.907	1.26009	NA
Spot 31	898.526	2955.7	2.06274	17.3592	1.74503	0.251738	7.47317	0.03476	0.643029	0.086045	220.271	1.39248	227.987	15.2617	309.33	169.748	220.271	1.39248	NA
Spot 103	1877.54	37747.9	3.61645	19.5797	0.773672	0.243322	1.00875	0.0348397	0.582009	0.576961	220.767	1.26313	221.137	2.00452	226.07	19.0516	220.767	1.26313	NA
Spot 11	1565.99	33501	2.81676	19.5778	0.818588	0.243708	1.17324	0.0350492	0.590969	0.503706	222.072	1.29003	221.452	2.33437	215.876	23.4692	222.072	1.29003	NA
Spot 94	1478.14	17918.6	2.83291	19.4328	0.895832	0.244741	1.59253	0.0350585	0.703944	0.44203	222.13	1.53704	222.295	3.1794	225.03	33.0131	222.13	1.53704	NA
Spot 68	1454.3	19255.1	2.90597	19.3653	0.793126	0.246831	1.07287	0.035224	0.570411	0.53167	223.161	1.25115	223.999	2.15659	233.833	20.9783	223.161	1.25115	NA
Spot 124	1249.93	17223.7	2.17496	18.9637	0.84962	0.252074	1.23492	0.0352848	0.455236	0.368637	223.54	1.00019	228.26	2.52445	278.188	26.2614	223.54	1.00019	NA
Spot 38	2447.49	43842	1.54631	19.6559	0.703331	0.246772	0.906837	0.0354591	0.520541	0.574019	224.624	1.14913	223.951	1.8225	217.864	17.2015	224.624	1.14913	NA
Spot 81	1035.74	19090.2	2.02357	19.1179	0.997011	0.251567	1.64624	0.0355025	0.638611	0.38792	224.895	1.41144	227.848	3.35989	259.415	34.8685	224.895	1.41144	NA
Spot 30	2675.15	62171	2.37498	19.6183	0.689515	0.248921	0.942954	0.0356683	0.57409	0.608821	225.927	1.27456	225.699	1.9083	224.325	17.2989	225.927	1.27456	NA
Spot 75	3421.16	69812	2.14222	19.5897	0.635452	0.249959	0.839262	0.0357726	0.537965	0.640997	226.576	1.19773	226.543	1.70412	227.198	14.8967	226.576	1.19773	NA
Spot 69	1243.2	27910.3	2.28082	19.2961	0.905518	0.253133	1.20935	0.0358022	0.655183	0.541763	226.761	1.45987	229.118	2.48048	254.379	23.3967	226.761	1.45987	NA
Spot 20	3307.84	79302	2.76798	19.6703	0.588482	0.252557	0.846331	0.036144	0.534878	0.631996	228.887	1.20279	228.652	1.73274	227.217	15.1564	228.887	1.20279	NA
Spot 135	1261.82	28900.8	2.30891	19.316	1.20712	0.258078	1.81584	0.036553	0.987646	0.543908	231.431	2.24518	233.117	3.78226	251.123	35.0435	231.431	2.24518	NA
Spot 60	232.94	81320.8	2.03954	4.19977	0.585685	20.479	0.82573	0.624792	0.581283	0.703962	3128.96	14.4093	3114.26	7.99414	3105.47	9.34202	3105.47	9.34202	100.756

## Sheet: Info
This Supplemental Material accompanies Miller, E.L., Raftrey, M.E., and Lund Snee, J.-E., 2021, Downhill from Austin and Ely to Las Vegas: U-Pb
detrital zircon suites from the Eocene–Oligocene Titus Canyon Formation and associated strata, Death Valley, Calif., in Craddock, J.P., Malone,
D.H., Foreman, B.Z., and Konstantinou, A., eds., Tectonic Evolution of the Sevier-Laramide Hinterland, Thrust Belt, and Foreland, and Postorogenic
Slab Rollback (180–20 Ma): Geological Society of America Special Paper 555, https://doi.org/10.1130/2021.2555(14).
This table is also in the PDF.
